# Supplementary material for: Molecular anatomy of the pre-primitive-streak chick embryo
Source: Open Biol. 2020 Feb 12;10(2):190299. doi: 10.1098/rsob.190299 (PMC7058932; doi:10.1098/rsob.190299)
Supplement: Electronic Supplementary Material [file rsob190299supp2.xlsx]

## Sheet: fpkm
tracking_id	gene_id	gene_short_name	gene_name	locus	homolog human gene id	homolog human gene name	human locus (hg38)	HC1_WAO	HC2_WMZ	HC3_WAP	HC4_AAO	HC5_AMZ	HC6_AAP	HC7_PAO	HC8_PMZ	HC9_PAP	HC10_Sickle	HC11_hypoblasts	HC12_GWM		mean	stdeva
ENSGALG00000000003	ENSGALG00000000003	PANX2	PANX2	chr1:20174066-20177667	ENSG00000073150	PANX2	chr22:50170731-50180294	2.86424	2.43576	2.27639	2.36353	2.95063	2.66684	2.71413	4.69529	1.28597	2.31849	2.58268	2.88941		2.67028	0.7757
ENSGALG00000000004	ENSGALG00000000004	-	RFKL	chrZ:34434330-34440653	ENSG00000135002	RFK	chr9:76385517-76394517	16.9608	20.3985	17.3654	20.5982	20.1742	17.3123	21.6232	18.4791	17.7216	13.9681	10.4147	17.7247		17.7284	3.09845
ENSGALG00000000011	ENSGALG00000000011	C10orf88	C10orf88	chr6:31441000-31444539	ENSG00000119965	C10orf88	chr10:122930903-122954403	45.2457	47.7403	48.1505	50.9286	50.6611	47.1646	43.6806	47.6623	50.6209	43.5346	32.2892	50.6531		46.5276	5.20023
ENSGALG00000000044	ENSGALG00000000044	WFIKKN1	WFIKKN1	chr14:13618721-13621217	ENSG00000127578	WFIKKN1	chr16:629239-634116	14.6078	14.3202	4.09721	10.9134	7.50471	7.90221	13.2375	14.945	5.99029	19.8625	9.66752	8.00709		10.9213	4.5565
ENSGALG00000000048	ENSGALG00000000048	-	ENSGALG00000000048	chr25:2898319-2906240				0.735685	0.908343	0.680584	0.697672	0.419505	0.441322	0.65464	0.687927	0.610279	0.947599	0.743673	0.79302		0.693354	0.157319
ENSGALG00000000055	ENSGALG00000000055	LAMTOR3	LAMTOR3	chr4:60487513-60514714	ENSG00000109270	LAMTOR3	chr4:99878336-99894490	59.1034	69.7822	63.458	55.7334	55.543	57.5068	53.8817	63.1976	75.4323	71.0231	81.7883	68.657		64.5922	8.82492
ENSGALG00000000059	ENSGALG00000000059	TUBB3	TUBB3	chr11:19086512-19089789	ENSG00000258947	TUBB3	chr16:89921392-89938761	179.693	199.743	229.636	160.741	158.9	225.842	173.965	209.249	267.739	221.279	213.784	200.005		203.381	31.6896
ENSGALG00000000067	ENSGALG00000000067	SPR	SPR	chr4:90447246-90450343	ENSG00000116096	SPR	chr2:72887360-72892158	17.2901	23.8295	27.8424	13.5249	14.2855	20.3258	18.0093	25.6878	39.9753	45.8518	58.6059	18.3159		26.962	14.0566
ENSGALG00000000071	ENSGALG00000000071	DDIAS	DDIAS	chr1:189094839-189101813	ENSG00000165490	DDIAS	chr11:82899975-82958277	14.4274	14.1446	15.7011	16.7218	14.3314	15.8962	14.2237	13.9406	15.6996	12.4889	11.6032	12.9197		14.3415	1.50601
ENSGALG00000000081	ENSGALG00000000081	-	IL4I1	chr16:205311-210738				0.415381	0.347712	0.225302	0.224284	0.255153	0.134372	0.107141	0.165184	0.0951285	0.224349	0.275137	0.609335		0.25654	0.145556
ENSGALG00000000086	ENSGALG00000000086	TIMM17A	TIMM17A	chr26:1104134-1111045	ENSG00000134375	TIMM17A	chr1:201955491-201970661	334.031	364.627	327.423	323.356	504.244	343.627	394.512	386.014	395.212	403.249	317.254	375.712		372.438	51.672
ENSGALG00000000091	ENSGALG00000000091	INTS4	INTS4	chr1:192954503-192986209	ENSG00000149262	INTS4	chr11:77878720-77994678	30.0609	32.1064	31.6939	28.7151	28.1028	34.5258	27.5083	32.6015	27.941	27.8448	34.2356	31.9033		30.6033	2.56017
ENSGALG00000000094	ENSGALG00000000094	-	ADIPOR1	chr26:1096732-1102409				63.6474	68.4751	68.822	57.1698	57.8933	67.8527	62.1133	67.3791	72.7309	77.2581	95.6564	69.5353		69.0444	10.1649
ENSGALG00000000102	ENSGALG00000000102	UBE2T	UBE2T	chr26:1089610-1092699	ENSG00000077152	UBE2T	chr1:202331657-202341980	38.0029	51.7989	62.4628	46.5224	64.1998	51.9683	46.338	49.8666	72.9886	76.1498	119.55	45.903		60.4793	21.9131
ENSGALG00000000104	ENSGALG00000000104	-	CRY4	chr26:1069629-1086604				0.89929	1.23624	1.09822	0.631298	0.883397	0.997661	1.1796	0.925406	1.3329	0.975022	1.8918	0.718194		1.06409	0.330268
ENSGALG00000000106	ENSGALG00000000106	-	ENSGALG00000000106	chr26:1069629-1086604	ENSG00000121931	LRIF1	chr1:110947185-110964079	18.0768	15.2676	18.3536	17.9927	16.6866	19.15	18.1972	18.5866	17.8999	18.304	17.501	16.1498		17.6805	1.11098
ENSGALG00000000107	ENSGALG00000000107	TRIM7	TRIM7	chr16:191905-201219	ENSG00000146054	TRIM7	chr5:181193924-181205293	0.78542	1.672	1.46376	0.281157	1.64848	0.855181	0.431856	1.12916	1.0595	0.562478	4.64295	0.267448		1.23328	1.18168
ENSGALG00000000109	ENSGALG00000000109	AFMID	AFMID	chr18:9950626-9953475	ENSG00000183077	AFMID	chr17:78187317-78207701	13.048	13.1236	11.2075	13.4752	10.9342	13.3154	11.1669	11.4343	14.2527	14.0589	11.8498	18.4156		13.0235	2.06641
ENSGALG00000000112	ENSGALG00000000112	PLP1	PLP1	chr4:1877761-2053843	ENSG00000123560	PLP1	chrX:103773718-103792619	0.224062	0.0958642	0.116467	0.210802	0.383705	0.277847	0.221541	0.227707	0.393404	0.674762	0.930952	0		0.313093	0.259925
ENSGALG00000000115	ENSGALG00000000115	-	HEP21	chr16:189280-190877				0.229404	0.147225	0.0894327	0.129496	0.0736598	0	0	0.116568	0.226566	0.388603	0.953146	0		0.196175	0.264076
ENSGALG00000000120	ENSGALG00000000120	BMP10	BMP10	chr22:284592-290447	ENSG00000163217	BMP10	chr2:68865481-68871517	0	0	0	0	0	0	0.0156897	0	0	0	0	0		0.00130748	0.00452923
ENSGALG00000000122	ENSGALG00000000122	GNB2L1	GNB2L1	chr16:153730-157612	ENSG00000204628	RACK1	chr5:181236909-181248096	3974.35	4358.65	4368.7	4073.3	4666.31	4151.84	4371.51	4511.63	6168.7	5395.29	4139.52	4314.1		4541.16	631.837
ENSGALG00000000123	ENSGALG00000000123	-	ENSGALG00000000123	chr16:134465-137899	ENSG00000103313	MEFV	chr16:3242028-3256627	0.0631258	0	0.0492175	0.0627783	0	0	0	0.0320754	0	0	0	0		0.0172664	0.0266281
ENSGALG00000000129	ENSGALG00000000129	TCF25	TCF25	chr11:19064510-19086448	ENSG00000141002	TCF25	chr16:89873570-89913627	11.5962	12.4363	9.20864	12.2261	12.1853	9.29757	12.1775	9.55106	10.6225	12.5995	16.0438	15.6379		11.9652	2.20313
ENSGALG00000000136	ENSGALG00000000136	Blec2	BLEC2	chr16:122773-125266	ENSG00000256797	KLRF2	chr12:9881489-9895833	0.126037	0.161773	0.196541	0.213439	0	0.468873	0.149542	0.19213	0.248954	0.355836	0.349112	0.219952		0.223516	0.122364
ENSGALG00000000137	ENSGALG00000000137	-	SNRPE	chr26:1667872-1670176				222.165	244.607	308.795	232.908	361.606	258.513	238.465	246.945	406.388	335.905	284.042	234.292		281.219	59.3682
ENSGALG00000000141	ENSGALG00000000141	BLB1	BLB1	chr16:116645-118450	ENSG00000196126	HLA-DRB1	chr6:32578769-32589848	0.484674	1.36861	2.46893	0.510707	1.61858	3.24549	0.460051	1.51067	4.21235	2.51781	2.37176	0.830043		1.79997	1.19201
ENSGALG00000000142	ENSGALG00000000142	CEPT1	CEPT1	chr26:1032398-1055596	ENSG00000134255	CEPT1	chr1:111139627-111185102	25.1598	36.091	28.5476	25.1649	24.0599	29.2698	25.1096	32.9893	29.8093	29.0458	24.6296	23.2975		27.7645	3.92461
ENSGALG00000000146	ENSGALG00000000146	SUPT6H	SUPT6H	chr19:5773591-5793552	ENSG00000109111	SUPT6H	chr17:28662091-28702684	39.9408	34.3591	29.8475	32.7724	34.8893	32.3328	32.7711	36.6807	22.285	22.6848	23.1972	32.343		31.1753	5.68422
ENSGALG00000000150	ENSGALG00000000150	RPL9	RPL9	chr4:69714759-69833817	ENSG00000163682	RPL9	chr4:39454124-39458948	2156.59	2455.17	2508.45	2389.59	3110.68	2386.67	2456.71	2613.59	3358.44	3040.08	2307.65	2306.61		2590.85	373.765
ENSGALG00000000151	ENSGALG00000000151	ADAMTS19	ADAMTS19	chrZ:45324843-45485330	ENSG00000145808	ADAMTS19	chr5:129460265-129738683	0.0498903	0.0426906	0.0648321	0.0469376	0.0961166	0.0927996	0.0986582	0.076053	0.076647	0.244149	0.506708	0.116088		0.125964	0.131216
ENSGALG00000000154	ENSGALG00000000154	DENND2D	DENND2D	chr26:1020204-1027765	ENSG00000162777	DENND2D	chr1:111187174-111204535	7.41494	11.318	17.0942	6.47081	10.3214	17.8181	8.53626	13.1974	18.1299	9.64116	5.96736	5.36258		10.9393	4.65342
ENSGALG00000000156	ENSGALG00000000156	BRD2	BRD2	chr16:102513-115717	ENSG00000204256	BRD2	chr6:32968660-32981505	62.7652	66.336	50.7114	62.0461	63.0238	53.2483	61.9668	55.6643	60.3668	62.8994	55.3992	69.8076		60.3529	5.56004
ENSGALG00000000158	ENSGALG00000000158	HLA-DMA	MHCDMA	chr16:96321-99142	ENSG00000204257	HLA-DMA	chr6:32948613-32969094	1.55624	1.1122	1.44294	1.23461	0.410387	0.834501	1.44683	1.06861	2.32622	1.47247	2.21356	1.32122		1.36998	0.528117
ENSGALG00000000161	ENSGALG00000000161	ISOC1	ISOC1	chrZ:45600339-45620745	ENSG00000066583	ISOC1	chr5:129094751-129114028	9.80464	11.8601	10.216	12.193	10.494	10.9055	14.4181	10.8247	10.7006	13.8574	13.147	13.4464		11.8223	1.5644
ENSGALG00000000162	ENSGALG00000000162	-	DMB1	chr16:93894-96168	ENSG00000248993	AL645941.2	chr6:32937364-32953122	0.100398	0.0429549	0.15656	0.0377825	0.0859653	0.0414993	0.0794146	0.0340104	0	0.226761	0.556189	0.116806		0.123195	0.149765
ENSGALG00000000164	ENSGALG00000000164	MYBPH	MYBPH	chr26:1001410-1010920	ENSG00000133055	MYBPH	chr1:203167811-203175813	2.59829	2.80732	4.92366	2.28362	2.40783	3.67063	2.20484	3.34248	4.7425	3.00857	2.27755	2.20023		3.03896	0.960203
ENSGALG00000000168	ENSGALG00000000168	ADORA1	ADORA1	chr26:981820-998840	ENSG00000163485	ADORA1	chr1:203090654-203167405	0.266316	0.0684157	0.0831193	0.120355	0.13692	0.0330483	0.158109	0.0812544	0.210573	0.240782	0.0738217	0.0934253		0.130512	0.0741831
ENSGALG00000000172	ENSGALG00000000172	MYOG	MYOG	chr26:968609-972124	ENSG00000122180	MYOG	chr1:203083132-203086036	0.0608201	0	0.0474213	0.102997	0	0	0.144326	0.0309048	0.0800902	0.0343424	0	0		0.0417418	0.0476985
ENSGALG00000000184	ENSGALG00000000184	SLC27A6	SLC27A6	chrZ:45636818-45675681	ENSG00000113396	SLC27A6	chr5:128538013-129033642	0.0706647	0.090701	0.165291	0.0598344	0.0680697	0.197162	0.0628827	0.0179536	0.139581	0.399012	0.195736	0.0822133		0.129092	0.102555
ENSGALG00000000186	ENSGALG00000000186	MTCH1	MTCH1	chr26:1661082-1667786	ENSG00000137409	MTCH1	chr6:36968141-36986298	3.82572	4.06725	3.9772	3.2721	3.37502	4.16903	3.3471	2.70979	2.95147	2.88029	6.20831	5.61989		3.86693	1.0752
ENSGALG00000000189	ENSGALG00000000189	-	ENSGALG00000000189	chrZ:45718091-45739382	ENSG00000047188	YTHDC2	chr5:113513683-113595285	3.99006	4.14775	3.61969	3.81958	3.13718	5.96376	4.6442	4.91838	1.2786	2.10738	3.25682	4.13028		3.75114	1.23849
ENSGALG00000000195	ENSGALG00000000195	SVCT2	SVCT2	chr22:377943-413671	ENSG00000089057	SLC23A2	chr20:4852356-5010293	12.1072	7.20758	5.18909	9.35856	4.99896	7.82914	8.54864	5.96338	2.8561	3.60695	6.64551	9.73052		7.00347	2.68665
ENSGALG00000000201	ENSGALG00000000201	PLEKHM1	PLEKHM1	chr27:1757582-1772756	ENSG00000225190	PLEKHM1	chr17:45435900-45490749	9.74833	8.81243	9.14394	9.04006	7.0777	5.95762	8.80877	7.11929	8.92207	9.10762	12.7617	14.4468		9.24553	2.34045
ENSGALG00000000208	ENSGALG00000000208	MCC	MCC	chrZ:45751048-45946263	ENSG00000171444	MCC	chr5:113022099-113488830	6.58616	7.13319	10.0613	8.05522	8.09558	11.4179	8.58402	8.57277	14.348	12.9567	8.68299	6.47524		9.24742	2.49267
ENSGALG00000000209	ENSGALG00000000209	PRNP	PRNP	chr22:439954-444495	ENSG00000171867	PRNP	chr20:4686236-4701590	1.70744	0.6788	2.68614	1.82532	1.06738	1.83625	2.47367	1.16705	2.74586	9.35028	32.3102	2.30292		5.01261	8.88625
ENSGALG00000000215	ENSGALG00000000215	DCP2	DCP2	chrZ:45955425-45980081	ENSG00000172795	DCP2	chr5:112976702-113020970	20.7896	17.7683	14.8751	19.7657	19.1996	22.7497	20.6347	18.5004	8.96142	9.59015	12.2042	17.2221		16.8551	4.50047
ENSGALG00000000217	ENSGALG00000000217	PPFIA4	PPFIA4	chr26:944390-966983	ENSG00000143847	PPFIA4	chr1:203026498-203078740	0.119494	0.208153	0.452537	0.0289087	0.065775	0.317525	0.0607629	0.190832	0.404627	0.20242	0.472844	0.139023		0.221908	0.155264
ENSGALG00000000218	ENSGALG00000000218	-	ENSGALG00000000218	chrZ:46009580-46016260	ENSG00000272869	AC008575.2	chr5:112861188-112893079	145.526	173.078	161.951	229.928	236.819	177.26	230.223	170.865	242.839	210.589	156.808	190.143		193.836	34.5421
ENSGALG00000000220	ENSGALG00000000220	-	APC	chrZ:46027194-46082742	ENSG00000258864	AC008575.1	chr5:112827213-112867582	4.9646	4.8915	6.19051	4.45102	5.69502	7.40091	4.66515	5.36871	5.07139	4.31245	6.0166	3.95311		5.24841	0.957932
ENSGALG00000000223	ENSGALG00000000223	TMEM183A	TMEM183A	chr26:913437-925134	ENSG00000163444	TMEM183A	chr1:203007386-203024848	120.557	99.9717	91.8764	141.48	94.9352	93.2301	134.492	113.936	114.437	147.266	148.092	150.054		120.861	22.7703
ENSGALG00000000225	ENSGALG00000000225	-	MGAT4C	chr26:905582-910800				8.38817	11.0732	14.8922	7.07312	7.39072	10.1936	13.084	19.9748	22.9628	45.7544	39.0569	15.6334		17.9564	12.486
ENSGALG00000000226	ENSGALG00000000226	TMEM9	TMEM9	chr26:901104-904818	ENSG00000116857	TMEM9	chr1:201134772-201171574	5.66521	4.78262	3.40921	5.7735	3.6137	2.66389	6.87966	4.28905	3.35457	5.36728	7.13522	6.14872		4.92355	1.46745
ENSGALG00000000227	ENSGALG00000000227	DPYSL2	DPYSL2	chr22:467829-509519	ENSG00000092964	DPYSL2	chr8:26514022-26658178	119.592	102.927	78.6181	111.009	92.2374	78.0746	111.725	90.3753	75.855	76.6022	74.8452	94.3359		92.1831	15.9656
ENSGALG00000000233	ENSGALG00000000233	SP2	SP2	chr27:4179406-4245458	ENSG00000167182	SP2	chr17:47896150-47928957	9.49919	7.7235	6.59901	8.42632	7.15516	5.80114	6.88534	6.84107	6.1839	5.92838	9.05094	10.1168		7.51756	1.44553
ENSGALG00000000234	ENSGALG00000000234	EPB41L4A	EPB41L4A	chrZ:46187203-46301052	ENSG00000129595	EPB41L4A	chr5:112142441-112419316	0.522746	0.555692	0.377189	0.446675	0.336722	0.436105	0.547699	0.268339	0.144849	0.860912	2.81843	0.511586		0.652245	0.704642
ENSGALG00000000235	ENSGALG00000000235	PPP2R2A	PPP2R2A	chr22:551091-584895	ENSG00000221914	PPP2R2A	chr8:26291491-26372680	252.513	270.596	258.229	269.716	326.849	302.5	267.698	265.188	270.817	211.781	126.724	195.521		251.511	52.3315
ENSGALG00000000239	ENSGALG00000000239	-	ENSGALG00000000239	chr27:1777178-1781597				1.01971	0.727135	0.942302	1.15124	0.145521	0.234165	1.03065	0.767631	0.397866	0.511811	0.836897	1.45		0.767911	0.388029
ENSGALG00000000241	ENSGALG00000000241	STARD4	STARD4	chrZ:46509913-46518374	ENSG00000164211	STARD4	chr5:111496033-111512590	4.32165	4.11172	3.29265	6.05985	4.30869	5.23669	6.19687	3.30901	3.91521	3.32795	2.33218	4.78304		4.26629	1.15956
ENSGALG00000000242	ENSGALG00000000242	EBF2	EBF2	chr22:614697-738010	ENSG00000221818	EBF2	chr8:25841730-26045397	0.18346	0.266876	0.22887	0.151891	0.282757	0.0909997	0.0870703	0.223734	0.177164	0.0966859	0.203269	0.142295		0.177923	0.0664879
ENSGALG00000000243	ENSGALG00000000243	-	RDM1	chr27:1782740-1787570	ENSG00000278023	RDM1	chr17:35918066-35930773	7.98989	9.63972	14.2431	6.13992	10.2209	10.4997	8.29509	8.21132	15.4854	12.2615	13.718	6.36336		10.2557	3.0888
ENSGALG00000000244	ENSGALG00000000244	CAMK4	CAMK4	chrZ:46532505-46697608	ENSG00000152495	CAMK4	chr5:111223653-111494886	1.51124	1.34155	0.681471	2.04516	2.20195	1.67752	1.80875	1.61953	1.03626	1.52423	2.45894	1.9055		1.65101	0.491036
ENSGALG00000000247	ENSGALG00000000247	WDR36	WDR36	chrZ:46726619-46756993	ENSG00000134987	WDR36	chr5:111091716-111130502	66.0442	72.5072	68.582	83.4799	79.745	93.4337	93.9313	83.4752	75.4231	68.7048	49.8346	69.957		75.4265	12.3892
ENSGALG00000000249	ENSGALG00000000249	-	GH	chr27:1787644-1791152	ENSG00000204414	CSHL1	chr17:63909597-63918838	0.270865	0.173831	0.323087	0.175151	0.260917	0	0.160689	0.137634	0.136191	0	0.143236	0.157565		0.161597	0.0963032
ENSGALG00000000251	ENSGALG00000000251	CD79B	CD79B	chr27:1793525-1797961	ENSG00000007312	CD79B	chr17:63928740-63932354	0.0216157	0	0.168537	0.0244038	0	0.0536089	0	0.0878694	0.170786	0	0	0.0251483		0.0459974	0.063585
ENSGALG00000000253	ENSGALG00000000253	SLC25A46	SLC25A46	chrZ:46823255-46837245	ENSG00000164209	SLC25A46	chr5:110738136-110765161	11.3504	10.54	6.42904	12.4313	9.26111	7.19528	13.0445	8.27624	3.28423	7.14672	11.9367	16.6794		9.79791	3.59986
ENSGALG00000000255	ENSGALG00000000255	MAN2A1	MAN2A1	chrZ:47154836-47271874	ENSG00000112893	MAN2A1	chr5:109689366-109869625	12.3491	11.022	10.2102	10.4743	9.83652	16.2385	12.6558	10.6949	4.3267	5.44034	7.01265	7.91306		9.84784	3.29314
ENSGALG00000000259	ENSGALG00000000259	PSMF1	PSMF1	chr20:10068515-10074329	ENSG00000125818	PSMF1	chr20:1113263-1189415	45.4843	45.8977	32.3235	43.3839	35.7283	33.6223	40.8735	35.1424	37.3214	40.6601	43.9008	53.6606		40.6666	6.19845
ENSGALG00000000264	ENSGALG00000000264	-	ENSGALG00000000264	chrZ:47377289-47399491	ENSG00000198961	PJA2	chr5:109334709-109409994	2.11491	1.61355	1.15314	1.98696	1.13971	1.22876	2.26366	1.15732	0.837443	1.15244	1.82298	2.06479		1.54464	0.487257
ENSGALG00000000273	ENSGALG00000000273	FER	FER	chrZ:47508616-47596423	ENSG00000151422	FER	chr5:108747822-109196841	2.78683	3.04787	1.59431	2.75532	2.07558	2.84234	3.32614	2.8992	1.41146	2.21608	3.12883	1.89932		2.49861	0.634525
ENSGALG00000000274	ENSGALG00000000274	-	ENSGALG00000000274	chr27:1832328-1840320				0.0349614	0	0.0545186	0	0.0224517	0	0.0207409	0	0.0460385	0.0987059	0.0484202	0.0203376		0.0288479	0.0297916
ENSGALG00000000275	ENSGALG00000000275	KCTD9	KCTD9	chr22:825261-833324	ENSG00000104756	KCTD9	chr8:25427847-25458476	21.9756	20.9994	19.1457	22.467	20.9258	22.0315	21.2068	19.9086	17.3553	18.2571	17.9443	23.0736		20.4409	1.8959
ENSGALG00000000276	ENSGALG00000000276	FBXL17	FBXL17	chrZ:47686971-47974445	ENSG00000145743	FBXL17	chr5:107859035-108382098	8.59588	11.2215	11.4427	6.93523	7.18965	13.0771	15.2736	19.2186	11.2918	17.7101	18.322	10.9032		12.5984	4.21319
ENSGALG00000000277	ENSGALG00000000277	GnRH-I	GNRH1	chr22:835869-838873	ENSG00000147437	GNRH1	chr8:25419260-25424654	0	0	0.49526	0.537843	0.407913	0.590753	0.188415	0.645528	0	0.179333	0.879721	0.184751		0.34246	0.291548
ENSGALG00000000280	ENSGALG00000000280	EFNA5	EFNA5	chrZ:48046147-48249653	ENSG00000184349	EFNA5	chr5:107376889-107670895	13.3802	15.1589	13.7806	15.2647	16.6452	11.9933	14.351	12.7541	16.8839	12.9902	12.9993	15.9943		14.3496	1.62151
ENSGALG00000000284	ENSGALG00000000284	HOXB4	HOXB4	chr27:3648587-4003342				3.6634	1.462	0.624075	4.83102	1.58157	0.57262	4.16399	1.03243	0.689158	1.35586	1.70544	5.47985		2.26345	1.76564
ENSGALG00000000293	ENSGALG00000000293	-	ENSGALG00000000293	chr27:1854434-1864610				1.76034	0.892855	0.951918	1.3463	1.05753	1.16187	1.28856	1.20467	0.831893	1.25852	0.747131	1.64338		1.17875	0.309848
ENSGALG00000000295	ENSGALG00000000295	-	ENSGALG00000000295	chr26:867136-875006				0.154003	0.0675278	0.120216	0.0989968	0.060061	0.156362	0.2165	0.110738	0.0846715	0.276793	0.223118	0.108824		0.139818	0.0677839
ENSGALG00000000296	ENSGALG00000000296	PCNX1	PCNX1	chr5:27201731-27283175	ENSG00000100731	PCNX1	chr14:70907405-71115382	13.0568	11.1002	12.7011	11.3523	10.9415	17.1574	12.0574	13.156	8.50887	8.34822	8.2953	8.27921		11.2462	2.66578
ENSGALG00000000299	ENSGALG00000000299	PKP1	PKP1	chr26:818282-850755	ENSG00000081277	PKP1	chr1:201283452-201332993	12.0782	5.99367	0.513461	8.31344	3.42168	1.98587	11.3829	3.83298	0.394177	1.62261	1.01569	4.12683		4.55679	4.07627
ENSGALG00000000302	ENSGALG00000000302	-	TNNT2	chr26:796119-806432	ENSG00000118194	TNNT2	chr1:201359008-201377762	6.26669	2.96585	4.77051	5.18463	7.57335	4.78682	5.67803	4.6766	4.28131	10.6224	7.12542	5.4621		5.78281	1.96715
ENSGALG00000000309	ENSGALG00000000309	LAD1	LAD1	chr26:789838-794797	ENSG00000159166	LAD1	chr1:201373244-201399915	15.3358	10.7435	3.44191	15.3398	10.0509	5.22526	15.475	6.37977	3.69923	8.28718	2.0644	11.3723		8.95125	4.86845
ENSGALG00000000311	ENSGALG00000000311	-	ENSGALG00000000311	chr22:844643-915617	ENSG00000147459	DOCK5	chr8:25184723-25418082	0.540784	0.212485	0.240942	0.473477	0.297672	0.301084	0.399388	0.235535	0.152598	0.324052	0.6114	0.597064		0.36554	0.156448
ENSGALG00000000313	ENSGALG00000000313	TNNI1	TNNI1	chr26:778999-784453	ENSG00000159173	TNNI1	chr1:201403768-201429866	0.552582	2.12778	7.29566	0.748626	3.78517	4.88795	0.830474	2.43347	11.4	5.24191	1.47959	0.60003		3.4486	3.31283
ENSGALG00000000314	ENSGALG00000000314	NEFL	NEFL	chr22:952290-957139	ENSG00000277586	NEFL	chr8:24950955-24957110	12.2929	10.424	8.65718	12.2437	14.4441	7.19901	10.8407	10.0562	8.50119	11.2232	26.6034	19.0013		12.6239	5.3801
ENSGALG00000000317	ENSGALG00000000317	NEFM	NEFM	chr22:961850-965751	ENSG00000104722	NEFM	chr8:24913012-24919098	9.87052	18.3558	14.6047	8.02285	18.3838	10.2364	8.07215	10.1337	11.7513	9.50764	12.0795	9.75082		11.7308	3.57741
ENSGALG00000000318	ENSGALG00000000318	CSRP1	CSRP1	chr26:499823-772333	ENSG00000159176	CSRP1	chr1:201483530-201509456	31.2642	46.9162	48.7533	27.5727	42.3254	47.084	32.923	54.8476	80.4375	69.7522	43.6773	29.6825		46.2697	16.0963
ENSGALG00000000329	ENSGALG00000000329	AHCYL1	AHCYL1	chr26:1288996-1307914	ENSG00000168710	AHCYL1	chr1:109984686-110023741	45.991	51.3531	50.3657	45.7932	45.3078	47.6147	42.0545	55.6489	49.0154	53.8054	80.3901	60.8381		52.3482	10.2194
ENSGALG00000000336	ENSGALG00000000336	PP1M M21 subunit	PP1M M21 subunit	chr26:499823-772333	ENSG00000077157	PPP1R12B	chr1:202348699-202592706	19.5603	25.2003	26.8268	16.9794	28.685	29.7876	18.3171	29.5539	24.3471	25.1774	21.7753	16.4322		23.5535	4.84631
ENSGALG00000000337	ENSGALG00000000337	CTXN1	CTXN1	chr28:399016-399271	ENSG00000178531	CTXN1	chr19:7924485-7926166	0.468287	0.601066	0.730244	0	0	0	0	0.475905	1.23332	1.58653	6.4856	0		0.965079	1.81571
ENSGALG00000000341	ENSGALG00000000341	-	EDMPN1	chr25:1912396-1913451				0	0.0916811	0	0.0806412	0.0917404	0.0885743	0.0847496	0	0.0940594	0.16133	0.0989254	0		0.0659751	0.0528985
ENSGALG00000000349	ENSGALG00000000349	PSMC5	PSMC5	chr27:1872535-1876047	ENSG00000087191	PSMC5	chr17:63827152-63832026	286.147	293.845	304.135	301.573	333.904	266.856	293.891	279.318	400.331	361.731	318.163	325.553		313.787	37.5878
ENSGALG00000000352	ENSGALG00000000352	TIMM44	TIMM44	chr28:474415-495534	ENSG00000104980	TIMM44	chr19:7926718-7943920	93.4251	104.914	98.1507	100.139	126.666	81.4938	96.5131	93.7784	116.882	103.68	80.386	90.2141		98.8535	13.275
ENSGALG00000000357	ENSGALG00000000357	ADAMDEC1	ADAMDEC1	chr22:1049689-1067955	ENSG00000134028	ADAMDEC1	chr8:24384285-24406013	0	0	0	0	0	0	0	0	0	0	0	0		0	0
ENSGALG00000000362	ENSGALG00000000362	-	ENSGALG00000000362	chr26:499823-772333	ENSG00000134369	NAV1	chr1:201622885-201826969	13.6954	15	19.4066	12.8667	12.4352	16.8062	11.7167	16.5953	20.3715	15.3158	9.55704	15.0137		14.8983	3.1231
ENSGALG00000000364	ENSGALG00000000364	STC1	STC1	chr22:1150403-1157453	ENSG00000159167	STC1	chr8:23841915-23854807	0.221356	0.49721	0.517773	0.374861	0.213228	0.68623	0.0656598	0.224957	0.437235	0.312475	0.843068	0.257532		0.387632	0.221343
ENSGALG00000000365	ENSGALG00000000365	-	NKX2-6	chr22:1169896-1172573				0.0838486	0.0459293	0.130695	0.0946215	0.0459589	0	0.099442	0.0727307	0.0471207	0.189155	0.347798	0.0416313		0.0999109	0.092134
ENSGALG00000000367	ENSGALG00000000367	-	ASIC2	chr27:1939763-2016704				1.30572	0.695672	0.268922	0.834495	0.890121	0.336049	1.31538	0.951402	0.778603	1.44674	0.477768	1.46178		0.896888	0.416659
ENSGALG00000000371	ENSGALG00000000371	-	CRHR1	chr27:2399394-2423289	ENSG00000263715	LINC02210-CRHR1	chr17:45620344-45835826	2.77931	0.852378	2.64645	2.41582	0.789749	2.07398	2.13034	1.59973	1.9757	3.05538	40.7066	6.00922		5.58622	11.1405
ENSGALG00000000374	ENSGALG00000000374	RNPEP	RNPEP	chr26:499823-772333	ENSG00000176393	RNPEP	chr1:201982372-202006147	17.1245	13.5456	9.4683	19.6449	15.0567	12.5814	19.024	14.5716	15.5411	15.6285	8.71861	21.651		15.213	3.87143
ENSGALG00000000377	ENSGALG00000000377	HNRNPM	HNRNPM	chr28:496610-521972	ENSG00000099783	HNRNPM	chr19:8444767-8489114	386.555	377.676	437.375	382.82	547.048	273.993	409.145	318.922	381.217	379.182	354.167	329.975		381.506	67.5651
ENSGALG00000000378	ENSGALG00000000378	SLC25A37	SLC25A37	chr22:1190200-1195716	ENSG00000147454	SLC25A37	chr8:23528805-23575463	20.9876	15.0959	18.9727	18.887	18.1008	17.0989	15.7591	17.2075	28.1713	24.961	20.0801	23.0021		19.8603	3.87642
ENSGALG00000000379	ENSGALG00000000379	-	ITGB3	chr27:2474194-2491225	ENSG00000259753	AC068234.1	chr17:47253897-47344292	48.7172	25.2605	3.28865	44.2398	10.1249	2.93493	52.3505	15.4987	2.77712	7.36333	2.47438	52.7897		22.3183	21.2108
ENSGALG00000000390	ENSGALG00000000390	ENTPD4	ENTPD4	chr22:1201008-1207911	ENSG00000197217	ENTPD4	chr8:23385783-23457695	15.8623	15.9453	14.0355	11.4173	13.4942	13.1346	11.0447	11.7034	7.77389	9.89398	16.8735	13.6768		12.9046	2.6718
ENSGALG00000000394	ENSGALG00000000394	SLC6A17	SLC6A17	chr26:1342525-1349149	ENSG00000197106	SLC6A17	chr1:110150486-110202202	1.29686	0.85164	0.399759	1.22578	0.542303	0.486188	0.697792	0.720277	0.417009	0.272476	0.856279	2.07022		0.819715	0.505392
ENSGALG00000000396	ENSGALG00000000396	-	METTL2A	chr27:2503688-2516378	ENSG00000165055	METTL2B	chr7:128476729-128506602	40.2627	44.6089	40.4523	53.1331	46.6701	38.8107	47.3643	49.6633	54.4714	52.732	47.4954	49.814		47.1232	5.24539
ENSGALG00000000397	ENSGALG00000000397	IPO9	IPO9	chr26:499823-772333	ENSG00000198700	IPO9	chr1:201829141-201884294	68.9926	67.3259	58.3738	63.02	64.7693	65.97	64.8225	65.9565	57.4189	51.2979	36.5683	57.1897		60.1421	9.05796
ENSGALG00000000399	ENSGALG00000000399	DUSP28	DUSP28	chr9:2677577-2680770	ENSG00000188542	DUSP28	chr2:240560054-240564014	0.0932555	0.0897729	0.218133	0.0789628	0	0.173462	0.110648	0.118466	0.0614012	0.105315	0.129155	0.13562		0.109516	0.0547302
ENSGALG00000000400	ENSGALG00000000400	-	ENSGALG00000000400	chr26:1357091-1364505	ENSG00000116396	KCNC4	chr1:110211343-110283100	1.24763	1.46008	1.94554	1.96783	1.48459	1.52436	1.08846	1.00688	2.10197	0.78736	0.228695	2.00652		1.40416	0.566392
ENSGALG00000000401	ENSGALG00000000401	RBM15	RBM15	chr26:1389269-1392137	ENSG00000162775	RBM15	chr1:110338506-110346681	9.56882	6.94199	6.45257	6.58845	5.94999	8.49149	6.21702	6.76486	4.54569	4.9904	5.65293	8.5686		6.72773	1.49284
ENSGALG00000000402	ENSGALG00000000402	LOXL2	LOXL2	chr22:1213670-1249445	ENSG00000134013	LOXL2	chr8:23297189-23425328	9.7626	9.75375	12.0173	11.3246	13.354	9.76689	10.5014	9.08554	14.6452	11.338	8.70434	10.4844		10.8948	1.75823
ENSGALG00000000404	ENSGALG00000000404	COPS2	COPS2	chr10:10432651-10453886	ENSG00000166200	COPS2	chr15:49106068-49155661	61.1968	72.0462	74.5262	74.9835	84.4248	73.6638	76.627	80.2049	80.2992	76.0555	64.2527	62.9059		73.4322	7.26949
ENSGALG00000000406	ENSGALG00000000406	-	ENSGALG00000000406	chr28:527494-537038	ENSG00000090661	CERS4	chr19:8206736-8262421	0	0	0.0543721	0.0393647	0	0.0432372	0	0.0708693	0.0459148	0.0393762	0	0.0405658		0.0278083	0.0259762
ENSGALG00000000407	ENSGALG00000000407	-	ENSGALG00000000407	chr28:539409-544254				3.12516	2.46025	2.27423	4.79842	3.61248	2.63523	3.53496	2.28672	2.9356	2.42344	2.59694	4.29036		3.08115	0.82331
ENSGALG00000000408	ENSGALG00000000408	LSM7	LSM7	chr28:546207-551800	ENSG00000130332	LSM7	chr19:2321517-2328620	179.584	182.154	181.711	195.691	256.455	136.61	193.15	162.715	191.131	175.159	152.368	173.98		181.726	29.1782
ENSGALG00000000409	ENSGALG00000000409	CHMP7	CHMP7	chr22:1264836-1273235	ENSG00000147457	CHMP7	chr8:23243637-23262000	68.0258	63.681	58.9408	70.2934	63.5991	55.7918	65.9437	55.4504	66.4899	60.9569	62.2668	74.6011		63.8367	5.69248
ENSGALG00000000410	ENSGALG00000000410	TLK2	TLK2	chr27:2528978-2568624	ENSG00000146872	TLK2	chr17:62458658-62615481	108.488	99.0061	78.0818	105.247	101.776	89.3455	103.571	90.7127	66.9293	81.6836	92.8656	107.492		93.7665	13.0264
ENSGALG00000000417	ENSGALG00000000417	SLC16A4	SLC16A4	chr26:1402848-1411888	ENSG00000168679	SLC16A4	chr1:110362848-110391082	0.109682	0.234635	0.4561	0.103191	0.140872	0.249353	0.0867583	0.0557331	0.409228	0.144509	0.10127	0.233946		0.193773	0.128337
ENSGALG00000000419	ENSGALG00000000419	LAMTOR5	LAMTOR5	chr26:1413367-1415592	ENSG00000134248	LAMTOR5	chr1:110401249-110407942	193.961	178.334	162.574	192.902	172.158	146.855	181.661	195.48	249.77	236.308	241.973	240.935		199.409	34.5646
ENSGALG00000000424	ENSGALG00000000424	CMTM3	CMTM3	chr11:11584763-11595252	ENSG00000140931	CMTM3	chr16:66603874-66613892	43.0497	49.6886	55.578	44.6728	43.1662	50.5258	46.6899	48.0525	58.271	63.6056	60.9773	40.7053		50.4152	7.55567
ENSGALG00000000428	ENSGALG00000000428	-	HINT1Z	chrZ:44899733-44903752	ENSG00000169567	HINT1	chr5:131159027-131171735	213.514	249.229	273.938	279.568	296.432	297.061	299.051	280.134	497.552	411.648	274.934	312.371		307.119	75.8206
ENSGALG00000000430	ENSGALG00000000430	SPPL2B	SPPL2B	chr28:551865-586908	ENSG00000005206	SPPL2B	chr19:2328615-2354806	17.6742	17.3082	16.9094	15.1084	13.4373	18.924	14.865	16.1973	10.1266	10.523	10.4456	12.1257		14.4704	3.08751
ENSGALG00000000433	ENSGALG00000000433	-	ENSGALG00000000433	chr7:22326552-22332653	ENSG00000127824	TUBA4A	chr2:219249711-219278170	2.01892	2.18305	3.16872	2.14794	1.93869	2.33923	2.03974	2.46443	4.4381	2.80551	2.39109	2.30987		2.52044	0.697373
ENSGALG00000000436	ENSGALG00000000436	RABIF	RABIF	chr26:499823-772333	ENSG00000183155	RABIF	chr1:202878957-202889135	88.1442	78.3524	96.6988	72.0958	88.5027	70.6901	84.4831	86.8293	118.495	98.504	79.4664	102.355		88.7181	13.6459
ENSGALG00000000437	ENSGALG00000000437	-	PGA3	chr26:1422502-1425632				0.615906	0.215602	0.305594	0.537313	0.323612	0.416591	0.631121	0.227609	0.405524	2.05503	5.15681	1.72626		1.05141	1.42162
ENSGALG00000000438	ENSGALG00000000438	ERMP1	ERMP1	chrZ:27772154-27788263	ENSG00000099219	ERMP1	chr9:5765076-5833117	11.0084	11.3757	8.97292	11.9465	8.12631	15.6161	12.4395	10.5184	3.9652	5.06638	4.91322	8.24046		9.34909	3.48596
ENSGALG00000000441	ENSGALG00000000441	KCNA10	KCNA10	chr26:1427485-1429339	ENSG00000143105	KCNA10	chr1:110517217-110519175	5.22648	9.17747	14.6023	4.85571	9.69618	8.12385	3.31593	5.90167	9.05708	3.85291	5.30319	6.60847		7.14344	3.16963
ENSGALG00000000442	ENSGALG00000000442	KCNA2	KCNA2	chr26:1458525-1460788	ENSG00000177301	KCNA2	chr1:110519837-110631474	0.538184	0.261377	0.703148	0.492649	0.2055	0.721484	0.431456	0.384336	0.536314	0.394234	1.12812	0.964593		0.56345	0.274385
ENSGALG00000000451	ENSGALG00000000451	MEIG1	MEIG1	chr1:7470106-7475632	ENSG00000197889	MEIG1	chr10:14959439-14988050	2.6665	2.82361	2.49487	3.16095	3.08229	2.23194	2.76832	2.50663	2.28237	2.63489	3.87764	4.11052		2.88671	0.58891
ENSGALG00000000452	ENSGALG00000000452	-	TNFRSF10B	chr22:1278136-1284564	ENSG00000120889	TNFRSF10B	chr8:23020133-23069179	14.1066	13.0758	8.51453	13.3759	11.528	6.86359	10.8625	9.01518	6.61886	7.14605	7.06487	17.8044		10.498	3.56674
ENSGALG00000000456	ENSGALG00000000456	MRPS21	MRPS21	chr25:2368226-2727336	ENSG00000266472	MRPS21	chr1:150293720-150308979	207.852	210.301	300.193	212.113	258.698	226.263	241.261	236.118	440.131	353.752	288.18	264.796		269.971	68.7684
ENSGALG00000000458	ENSGALG00000000458	TMPRSS9	TMPRSS9	chr28:603117-614593	ENSG00000178297	TMPRSS9	chr19:2389771-2426239	104.374	119.592	85.553	96.7583	105.372	128.368	94.542	97.7399	98.1226	62.8679	4.52024	25.2243		85.2529	36.8918
ENSGALG00000000461	ENSGALG00000000461	MRC2	MRC2	chr27:2576055-2597588	ENSG00000011028	MRC2	chr17:62627401-62693597	10.9007	12.6973	23.2776	8.8058	8.68208	17.8265	9.42747	14.9382	19.7571	14.6376	11.382	11.0812		13.6178	4.63424
ENSGALG00000000466	ENSGALG00000000466	LCK	LCK	chr23:5137851-5158527	ENSG00000182866	LCK	chr1:32251239-32286165	0.185727	0.101711	0.118905	0.138941	0.13405	0.101599	0.107612	0.114089	0.173182	0.0586177	0.233278	0.280315		0.145669	0.0624944
ENSGALG00000000469	ENSGALG00000000469	ADRA1A	ADRA1A	chr22:4528860-4544179	ENSG00000120907	ADRA1A	chr8:26748150-26867273	0.139076	0.396689	0.93979	0.122122	0.277862	0.555707	0.0366697	0.235564	0.569771	0.209414	0.0214017	0.10787		0.300995	0.271543
ENSGALG00000000470	ENSGALG00000000470	LMNB2	LMNB2	chr28:623374-649206	ENSG00000176619	LMNB2	chr19:2427638-2456996	79.1322	62.1754	42.7953	54.9317	55.2128	71.2888	60.7386	50.3737	24.4853	25.7895	31.9031	42.4365		50.1052	17.2961
ENSGALG00000000474	ENSGALG00000000474	RPL36	RPL36	chr28:662316-665141	ENSG00000130255	RPL36	chr19:5674947-5691876	4291.12	4884.15	5091.92	4586.41	7159.41	4959.13	5222.87	5203.95	6978.6	5867.68	4431.21	4600.26		5273.06	939.426
ENSGALG00000000476	ENSGALG00000000476	LRRTM4	LRRTM4	chr22:4048930-4051993	ENSG00000176204	LRRTM4	chr2:76747719-77593319	9.88232	9.96038	3.70571	8.31468	8.37745	4.27135	6.9974	7.90718	3.0877	2.86119	0.7084	5.09717		5.93091	3.04129
ENSGALG00000000477	ENSGALG00000000477	-	ENSGALG00000000477	chr26:1508359-1510438	ENSG00000180316	PNPLA1	chr6:36243203-36312229	0.864178	1.04396	1.26832	0.975642	0.652897	0.567328	1.14598	0.929897	0.803282	0.574075	0	0.177425		0.750249	0.378407
ENSGALG00000000478	ENSGALG00000000478	-	ENSGALG00000000478	chr27:2792541-2813795				3.64435	2.45671	2.98469	2.60834	2.24723	4.43525	2.92473	3.26156	2.49498	2.10693	2.42323	2.47424		2.83852	0.66834
ENSGALG00000000483	ENSGALG00000000483	-	ENSGALG00000000483	chr26:1514681-1518984				6.29028	1.64888	0.414466	6.6015	1.82063	1.09862	8.61972	2.34096	0.291665	1.00052	2.08592	11.3382		3.62928	3.64656
ENSGALG00000000497	ENSGALG00000000497	-	ENSGALG00000000497	chr26:1522347-1523129				1.91653	2.95194	4.18408	4.32747	2.46154	7.12977	3.63835	3.50588	5.04753	3.46298	1.5926	4.4595		3.72318	1.49516
ENSGALG00000000498	ENSGALG00000000498	-	ACE	chr27:2830974-2847223	ENSG00000264813	AC113554.1	chr17:63484823-63521848	0.0345578	0.0887126	0.377224	0.0780302	0.08877	0.239978	0.0410028	0.126432	0.263941	0.273186	1.08166	0.0884521		0.231829	0.288847
ENSGALG00000000504	ENSGALG00000000504	ETV7	ETV7	chr26:1529163-1533184	ENSG00000010030	ETV7	chr6:36354091-36387800	5.60189	6.22936	4.60552	7.13958	6.29766	5.12798	7.28068	4.49925	5.05567	4.09736	3.56656	5.78191		5.44029	1.16453
ENSGALG00000000505	ENSGALG00000000505	KCNH6	KCNH6	chr27:2854850-2882929	ENSG00000173826	KCNH6	chr17:63523334-63548977	0.4041	0.398271	0.540129	0.3829	0.370724	0.554791	0.299665	0.440007	0.456115	0.643786	3.27802	0.386187		0.679558	0.823759
ENSGALG00000000507	ENSGALG00000000507	CPNE7	CPNE7	chr11:18986241-18989246	ENSG00000178773	CPNE7	chr16:89575768-89597246	0.398168	0.355828	0.665037	0.288896	0.522766	0.750352	0.468217	0.882276	0.758188	0.921833	0.87793	0.51313		0.616885	0.22094
ENSGALG00000000510	ENSGALG00000000510	DCAF7	DCAF7	chr27:2884254-2899987	ENSG00000136485	DCAF7	chr17:63550461-63594266	11.6577	13.4983	14.6068	11.2378	12.2191	14.4258	11.8393	13.8855	15.1259	12.0512	13.6277	12.1972		13.031	1.3128
ENSGALG00000000511	ENSGALG00000000511	KCTD20	KCTD20	chr26:1533746-1550311	ENSG00000112078	KCTD20	chr6:36442767-36491143	60.3541	65.6938	67.0583	62.8732	69.8909	69.5703	64.6424	66.4153	73.6547	61.5612	56.1038	61.9816		64.9833	4.79341
ENSGALG00000000513	ENSGALG00000000513	ZNF276	ZNF276	chr11:19016869-19054970	ENSG00000158805	ZNF276	chr16:89720400-89740903	25.5281	26.3192	23.8454	25.0701	26.1116	22.2538	25.9701	26.7672	25.5158	25.0774	25.8671	34.2864		26.051	2.86363
ENSGALG00000000516	ENSGALG00000000516	FANCA	FANCA	chr11:19016869-19054970	ENSG00000187741	FANCA	chr16:89737549-89816657	11.2917	5.18741	2.96467	9.2893	3.89053	3.54249	10.6907	4.72088	4.11177	10.0549	10.9576	18.8183		7.96002	4.72534
ENSGALG00000000518	ENSGALG00000000518	KLHL12	KLHL12	chr26:499823-772333	ENSG00000117153	KLHL12	chr1:202891100-202928636	78.2485	71.7494	74.847	73.6616	82.159	73.6086	73.6654	70.7738	97.4826	85.379	62.4308	90.6302		77.8863	9.58821
ENSGALG00000000521	ENSGALG00000000521	SPIRE2	SPIRE2	chr11:19057726-19063586	ENSG00000204991	SPIRE2	chr16:89818179-89871319	3.7618	0.379672	0.0712914	3.54545	0.574549	0.226785	3.79501	0.586184	0.0173064	2.22107	2.06876	9.88405		2.26099	2.82135
ENSGALG00000000523	ENSGALG00000000523	STK38	STK38	chr26:1556063-1564278	ENSG00000112079	STK38	chr6:36493892-36547470	10.5877	16.2543	13.1911	8.92943	11.1218	14.6483	9.71009	12.9467	6.4265	7.82976	12.5484	8.67861		11.0727	2.92846
ENSGALG00000000525	ENSGALG00000000525	MAP3K3	MAP3K3	chr27:2906873-2941579	ENSG00000198909	MAP3K3	chr17:63622415-63696303	4.47263	3.35819	3.62406	3.30034	3.41667	4.42251	4.02344	3.96608	2.65615	2.80611	4.39278	4.13226		3.71427	0.61865
ENSGALG00000000528	ENSGALG00000000528	DBNDD1	DBNDD1	chr11:19093978-19155777	ENSG00000003249	DBNDD1	chr16:90004865-90020128	7.6361	7.9912	10.2127	6.71377	9.00089	9.37016	6.29575	7.73241	13.81	8.3193	9.8424	7.97285		8.74146	1.9816
ENSGALG00000000529	ENSGALG00000000529	LIMD2	LIMD2	chr27:2950470-2960895	ENSG00000136490	LIMD2	chr17:63695902-63701172	4.28401	7.72591	14.5891	5.8651	7.04821	9.87144	6.88884	7.40644	20.6437	10.3848	7.33483	3.5086		8.79591	4.73302
ENSGALG00000000533	ENSGALG00000000533	SRSF3	SRSF3	chr26:1573429-1579366	ENSG00000112081	SRSF3	chr6:36594353-36605600	476.604	510.43	566.234	540.149	661.98	501.921	547.327	585.387	677.513	582.534	528.963	581.835		563.406	60.3332
ENSGALG00000000535	ENSGALG00000000535	ERRFI1	ERRFI1	chr21:237399-240168	ENSG00000116285	ERRFI1	chr1:8004404-8026308	45.2811	34.566	33.4688	45.2772	31.6001	44.8628	42.7185	35.496	23.629	25.5518	28.1542	38.6397		35.7704	7.71108
ENSGALG00000000538	ENSGALG00000000538	-	RNF113A	chr27:2961284-2967376	ENSG00000139797	RNF113B	chr13:98175785-98177265	47.5033	50.3915	57.6864	50.7996	65.8645	47.7469	48.3341	55.432	70.5148	66.1363	69.0726	56.8652		57.1956	8.66529
ENSGALG00000000540	ENSGALG00000000540	GAS8	GAS8	chr11:19093978-19155777	ENSG00000141013	GAS8	chr16:90019629-90044975	22.8429	27.8595	29.7769	24.0514	34.324	25.0067	23.0535	25.9576	32.9591	25.8723	25.3648	24.2403		26.7758	3.75585
ENSGALG00000000541	ENSGALG00000000541	-	ZC3H11A	chr26:471162-484685	ENSG00000215817	ZC3H11B	chr1:219608347-219613145	38.3693	40.0682	38.6771	38.5744	42.2234	38.5114	34.6238	37.9554	35.6246	31.1621	40.4549	41.3849		38.1358	3.0802
ENSGALG00000000542	ENSGALG00000000542	ZNF593	ZNF593	chr23:242518-243718	ENSG00000142684	ZNF593	chr1:26169871-26170873	239.785	254.302	243.992	244.965	219.267	196.113	244.223	260.08	352.273	298.668	260.039	294.952		259.055	40.6017
ENSGALG00000000544	ENSGALG00000000544	RAB44	RAB44	chr26:1593032-1605920	ENSG00000255587	RAB44	chr6:36697851-36733183	0.294152	0.31463	0.480541	0.419068	0.0989475	0.156326	0.35732	0.270467	0.56258	0.466646	0.281292	0.220001		0.326831	0.137204
ENSGALG00000000545	ENSGALG00000000545	REN	REN	chr26:1715949-1719075	ENSG00000143839	REN	chr1:204154819-204190324	0.0637298	0	0.0993799	0.0719498	0.0818527	0.19757	0.0378077	0.0323833	0.167844	0.143942	0.176527	0.222435		0.107952	0.0719934
ENSGALG00000000549	ENSGALG00000000549	-	URAH	chr11:19093978-19155777				1.42889	2.17792	1.94967	2.41978	1.26171	2.54709	3.17883	2.08744	5.88004	3.12647	2.35001	2.38971		2.56646	1.18803
ENSGALG00000000550	ENSGALG00000000550	STRADA	STRADA	chr27:2968261-2979376	ENSG00000266173	STRADA	chr17:63682336-63741986	65.4034	63.8225	60.8289	69.0266	58.2852	61.1723	66.083	61.2392	68.5777	69.7278	73.8666	72.693		65.8939	4.98708
ENSGALG00000000551	ENSGALG00000000551	C6orf89	C6orf89	chr26:1608778-1626550	ENSG00000198663	C6orf89	chr6:36871870-36928964	7.33601	5.4674	6.90736	6.79567	5.76708	5.98189	5.83158	6.32071	7.63878	7.94202	11.4963	9.03615		7.21008	1.70624
ENSGALG00000000556	ENSGALG00000000556	-	UTS2	chr21:266262-269577	ENSG00000049247	UTS2	chr1:7843083-7853512	0.162621	0	0.126795	0.183596	0	0.100829	0.096475	0	0	0.0918251	0.225224	0.0945991		0.0901637	0.0776102
ENSGALG00000000557	ENSGALG00000000557	ETNK2	ETNK2	chr26:1706579-1713414	ENSG00000143845	ETNK2	chr1:204131062-204152003	0.828779	1.29172	2.86173	0.802008	0.684295	2.23897	0.737509	1.17315	3.00126	2.13931	1.51677	0.998661		1.52285	0.833555
ENSGALG00000000558	ENSGALG00000000558	SLC1A6	SLC1A6	chr28:682645-704983	ENSG00000105143	SLC1A6	chr19:14950034-15022990	0.600959	0.302775	0.289022	0.545314	0.346252	0.37609	0.533112	0.490871	0.332817	0.418619	0.280028	0.588089		0.425329	0.120468
ENSGALG00000000560	ENSGALG00000000560	-	ENSGALG00000000560	chr26:1628841-1632635	ENSG00000164530	PI16	chr6:36948263-36964837	0	0	0	0	0	0	0	0.062854	0	0	0.085657	0		0.0123759	0.0293099
ENSGALG00000000564	ENSGALG00000000564	CCDC47	CCDC47	chr27:2980910-2989606	ENSG00000108588	CCDC47	chr17:63745250-63776351	47.4741	51.5733	36.6327	50.1481	55.3405	44.6908	50.6482	43.8052	39.9067	42.4382	31.6861	45.8775		45.0185	6.71989
ENSGALG00000000568	ENSGALG00000000568	LGR6	LGR6	chr26:423512-463485	ENSG00000133067	LGR6	chr1:202193901-202319781	1.27251	2.34109	1.9182	0.76621	1.85229	2.99815	0.553606	1.37943	2.45768	0.574825	0.469968	0.493493		1.42312	0.880469
ENSGALG00000000573	ENSGALG00000000573	PER3	PER3	chr21:272582-291803	ENSG00000049246	PER3	chr1:7784320-7845177	13.2078	11.4673	10.092	14.1487	12.5813	15.1764	13.3884	12.6615	9.99203	9.4039	4.49512	12.2567		11.5726	2.82459
ENSGALG00000000576	ENSGALG00000000576	RRNAD1	RRNAD1	chr25:1439371-1441316	ENSG00000143303	RRNAD1	chr1:156728442-156736960	11.9468	13.2192	9.13645	13.1002	8.99484	10.1318	12.4098	11.3038	12.9292	12.7163	10.7136	14.0857		11.724	1.66626
ENSGALG00000000577	ENSGALG00000000577	RANBP3	RANBP3	chr28:734246-764185	ENSG00000031823	RANBP3	chr19:5916139-5978142	47.7947	52.6962	47.8675	43.3396	48.2341	49.7883	43.9652	48.3302	32.8644	33.5092	36.6094	40.6723		43.8059	6.57061
ENSGALG00000000579	ENSGALG00000000579	VAMP3	VAMP3	chr21:292092-295858	ENSG00000049245	VAMP3	chr1:7771269-7781432	115.576	111.28	117.763	119.756	124.433	99.2685	109.646	114.868	159.8	147.213	123.255	115.606		121.539	16.5412
ENSGALG00000000581	ENSGALG00000000581	DDX42	DDX42	chr27:2989796-3006212	ENSG00000198231	DDX42	chr17:63773603-63819317	41.245	46.605	44.2556	39.9795	41.7223	45.9008	40.9905	44.4477	40.1723	37.7746	45.3886	43.4192		42.6584	2.74257
ENSGALG00000000583	ENSGALG00000000583	SOX13	SOX13	chr26:1683808-1703852	ENSG00000143842	SOX13	chr1:204073115-204127743	20.9216	36.195	62.0633	21.3959	38.6355	53.7472	21.6661	41.7321	73.9195	46.6564	37.9351	25.8974		40.0638	16.8935
ENSGALG00000000584	ENSGALG00000000584	-	ENSGALG00000000584	chr26:375288-387140				5.19371	4.5081	1.3478	4.61282	3.4211	2.19228	2.88072	1.62897	0.58977	0.780859	0.337346	4.25078		2.64535	1.73258
ENSGALG00000000585	ENSGALG00000000585	-	MYL4	chr27:3015290-3020580				3.90098	4.38708	4.19177	4.60524	5.40043	4.30575	2.58859	6.2662	7.16683	60.6544	89.5419	6.13061		16.595	28.0387
ENSGALG00000000589	ENSGALG00000000589	-	BTN1A1	chr28:790660-796192	ENSG00000124557	BTN1A1	chr6:26501221-26510422	0.524857	0.448958	0.810868	0.593062	0.41453	0.628133	0.255294	0.382666	0.887703	0.383114	0.276795	0.145463		0.479287	0.221614
ENSGALG00000000593	ENSGALG00000000593	-	ENSGALG00000000593	chr4:60552549-60554841				0	0	0	0	0.131556	0	0	0	0	0.115674	0	0		0.0206025	0.0482361
ENSGALG00000000596	ENSGALG00000000596	CDC27	CDC27	chr27:3024096-3050899	ENSG00000004897	CDC27	chr17:47117703-47189422	50.1604	54.1235	55.206	50.012	49.6003	51.6607	47.7851	55.3317	50.4473	55.0811	77.5889	50.1462		53.9286	7.8761
ENSGALG00000000599	ENSGALG00000000599	MARCH2	MARCH2	chr28:803141-814464	ENSG00000099785	MARCH2	chr19:8413270-8439017	6.17685	5.42834	4.16525	5.90553	3.14476	5.86544	4.75383	4.86352	3.88376	5.5302	6.01141	9.77599		5.45874	1.65667
ENSGALG00000000603	ENSGALG00000000603	KANSL1	KANSL1	chr27:3055085-3122696	ENSG00000120071	KANSL1	chr17:46029916-46225389	27.8029	28.1057	29.7476	25.6016	23.4066	30.2883	26.3206	32.5375	33.5757	33.6244	30.9537	33.1379		29.5919	3.38496
ENSGALG00000000604	ENSGALG00000000604	-	ENSGALG00000000604	chr23:542218-560715	ENSG00000084628	NKAIN1	chr1:31179745-31239554	29.1296	20.4954	12.8147	22.4022	14.1587	14.6642	24.4948	21.7273	8.62196	27.0867	15.6377	47.8816		21.5929	10.3239
ENSGALG00000000606	ENSGALG00000000606	ARL8A	ARL8A	chr26:344888-354803	ENSG00000143862	ARL8A	chr1:202133404-202144743	40.3053	35.679	20.1541	42.8903	28.1509	20.1367	33.93	22.6131	20.8793	24.8464	28.1874	55.1663		31.0782	10.8907
ENSGALG00000000607	ENSGALG00000000607	GPR37L1	GPR37L1	chr26:339117-343258	ENSG00000170075	GPR37L1	chr1:202122858-202133592	0.92821	0.558466	0.452313	0.867819	0.521571	0.26276	0.412995	0.456915	0.546046	0.525061	0.134868	0.286848		0.496156	0.228005
ENSGALG00000000608	ENSGALG00000000608	CDH1	CDH1	chr11:19093978-19155777	ENSG00000039068	CDH1	chr16:68737225-68835548	516.098	605.097	639.298	460.546	546.49	642.876	514.098	620.912	748.624	565.865	372.913	472.97		558.816	100.535
ENSGALG00000000611	ENSGALG00000000611	PPP1R15B	PPP1R15B	chr26:1775327-1779751	ENSG00000158615	PPP1R15B	chr1:204403387-204411791	24.0172	19.1749	13.0061	20.4751	20.7928	17.2799	16.4851	13.2869	10.4163	13.8855	21.3712	25.7966		17.999	4.7489
ENSGALG00000000613	ENSGALG00000000613	RAB11B	RAB11B	chr28:820468-833331	ENSG00000185236	RAB11B	chr19:8389981-8404434	69.761	83.1428	86.5996	66.542	70.9207	81.5514	74.6572	78.111	85.2092	82.1937	77.0458	72.0712		77.3171	6.56097
ENSGALG00000000615	ENSGALG00000000615	SNRNP40	SNRNP40	chr23:568348-579100	ENSG00000060688	SNRNP40	chr1:31259568-31296782	178.376	178.698	182.053	184.182	197.394	183.503	191.538	179.847	217.722	189.061	150.852	180.819		184.504	15.3325
ENSGALG00000000616	ENSGALG00000000616	ELF3	ELF3	chr26:313617-317551	ENSG00000163435	ELF3	chr1:202007945-202017188	6.08319	3.32745	1.79687	4.71914	3.41637	1.94782	3.90867	2.27899	1.68818	2.1638	0.532445	1.52033		2.78194	1.56001
ENSGALG00000000618	ENSGALG00000000618	ZCCHC17	ZCCHC17	chr23:579320-592457	ENSG00000121766	ZCCHC17	chr1:31296982-31364953	80.2252	75.1099	91.2955	81.1958	96.6094	82.6854	76.1616	80.6553	117.594	83.2026	62.6216	75.5095		83.5722	13.631
ENSGALG00000000619	ENSGALG00000000619	ANGPTL4	ANGPTL4	chr28:838934-846067	ENSG00000167772	ANGPTL4	chr19:8363289-8374373	21.4906	14.5727	21.9076	16.157	9.31294	12.038	20.263	9.86564	15.4219	16.485	15.2617	50.6992		18.6229	10.8959
ENSGALG00000000621	ENSGALG00000000621	KANK3	KANK3	chr28:863497-872099	ENSG00000186994	KANK3	chr19:8322584-8343262	3.48319	1.89597	2.32289	2.79294	1.24849	1.39784	2.66786	1.69322	2.51695	1.48916	1.35385	7.21848		2.50674	1.63785
ENSGALG00000000625	ENSGALG00000000625	MAPT	MAPT	chr27:3126089-3162020	ENSG00000186868	MAPT	chr17:45894382-46028334	4.19629	4.96912	4.46	3.79317	4.17942	5.79364	3.21683	4.44372	5.5652	4.98244	3.58795	3.16653		4.36286	0.852332
ENSGALG00000000627	ENSGALG00000000627	DNAJC11	DNAJC11	chr21:489941-551357	ENSG00000007923	DNAJC11	chr1:6634168-6701924	71.7628	74.9812	72.7065	72.7591	93.9128	77.3147	79.1547	80.8345	76.6315	73.2227	61.6481	71.1544		75.5069	7.57337
ENSGALG00000000629	ENSGALG00000000629	-	ENSGALG00000000629	chr28:875632-876795	ENSG00000167774	AC010323.1	chr19:8308283-8321379	133.537	127.48	156.04	137.447	140.5	127.371	145.454	163.49	225.858	191.113	146.677	164.069		154.92	28.8262
ENSGALG00000000630	ENSGALG00000000630	HAS3	HAS3	chr11:19093978-19155777	ENSG00000103044	HAS3	chr16:69105564-69118719	1.39011	0.905445	1.45593	1.12435	0.90603	0.488838	0.787754	0.442793	0.573753	0.445185	0.431025	0.772437		0.810304	0.36223
ENSGALG00000000632	ENSGALG00000000632	CHTF8	CHTF8	chr11:19157096-19169735	ENSG00000168802	CHTF8	chr16:69118010-69132584	138.005	137.975	139.974	145.739	129.142	120.683	137.029	127.233	177.337	142.115	107.756	159.881		138.572	17.8704
ENSGALG00000000636	ENSGALG00000000636	MDM4	MDM4	chr26:1802526-1819782	ENSG00000198625	MDM4	chr1:204516379-204558120	68.6903	41.0761	20.5711	54.7339	34.7133	37.2607	52.3577	42.4985	11.5224	23.0988	44.045	72.63		41.9331	18.4542
ENSGALG00000000637	ENSGALG00000000637	ZBTB48	ZBTB48	chr21:554291-560757	ENSG00000204859	ZBTB48	chr1:6580001-6589280	22.9481	22.4604	20.5629	21.2273	21.2461	20.4613	22.5391	23.3777	24.9054	21.6406	22.4684	26.65		22.5406	1.80412
ENSGALG00000000638	ENSGALG00000000638	UTP4	UTP4	chr11:19157096-19169735	ENSG00000141076	UTP4	chr16:69131291-69231130	279.007	266.576	219.966	274.557	245.461	240.889	282.957	284.126	304.603	285.252	168.271	312.38		263.67	39.9183
ENSGALG00000000639	ENSGALG00000000639	LRRN2	LRRN2	chr26:1831197-1833288	ENSG00000170382	LRRN2	chr1:204617170-204685733	0.142832	0.10185	0.643445	0.12542	0.101916	0.393595	0.13181	0.532236	0.710548	0.985732	1.47263	0.258494		0.466709	0.429024
ENSGALG00000000643	ENSGALG00000000643	ANKS3	ANKS3	chr14:12889939-12901828	ENSG00000168096	ANKS3	chr16:4696510-4734378	5.61298	6.32756	5.46003	5.10384	6.2678	7.10323	5.6699	5.84758	3.79463	3.411	4.50036	6.33526		5.45285	1.09163
ENSGALG00000000645	ENSGALG00000000645	ESPN	ESPN	chr21:588401-595422	ENSG00000187017	ESPN	chr1:6424788-6461370	0.356121	0.228548	5.14945	0.694458	0.498973	1.86679	0.403331	0.345464	2.94162	0.822624	1.74867	0.640315		1.30803	1.4604
ENSGALG00000000650	ENSGALG00000000650	NIP7	NIP7	chr11:19174899-19176268	ENSG00000132603	NIP7	chr16:69339430-69343111	412.202	404.75	358.297	432.874	441.55	354.708	451.61	447.422	580.676	498.902	342.708	501.625		435.61	69.0848
ENSGALG00000000652	ENSGALG00000000652	ACOT7	ACOT7	chr21:604019-610916	ENSG00000097021	ACOT7	chr1:6264269-6394391	83.5656	97.9396	114.778	77.3	97.928	100.648	82.9805	98.4317	136.996	107.96	50.5853	73.8189		93.5776	22.0932
ENSGALG00000000653	ENSGALG00000000653	CNTN2	CNTN2	chr26:1968415-1991975	ENSG00000184144	CNTN2	chr1:205042937-205078284	0.0478338	0.0204655	1.74047	0.0360023	0.112633	0.316352	0.0283774	0.105326	1.33327	0.243087	0.441653	0.102027		0.377291	0.563422
ENSGALG00000000654	ENSGALG00000000654	-	TMED6	chr11:19176608-19179130	ENSG00000157315	TMED6	chr16:69343248-69351809	0.362417	0.465177	0	0.613743	0.116369	0.112353	0.161253	0.092078	0.298277	0.15348	0.188225	0.105411		0.222399	0.178528
ENSGALG00000000657	ENSGALG00000000657	-	TERF2	chr11:19180204-19188036	ENSG00000132604	TERF2	chr16:69355561-69408571	45.7872	48.1929	47.4709	45.9059	42.2377	44.8165	43.2405	42.4987	46.182	44.1607	58.7856	52.7166		46.8329	4.73028
ENSGALG00000000660	ENSGALG00000000660	CYB5B	CYB5B	chr11:19192248-19204431	ENSG00000103018	CYB5B	chr16:69424525-69466266	124.498	128.613	141.392	134.111	165.666	131.104	136.348	126.847	152.614	161.86	182.303	130.747		143.009	18.4251
ENSGALG00000000667	ENSGALG00000000667	EDN2	EDN2	chr23:953065-958386	ENSG00000127129	EDN2	chr1:41478775-41484673	0.0842061	0.0772014	0	0.0543241	0.0772513	0.014917	0.0856375	0.0611256	0.0633633	0.0543399	0.0999619	0.0559816		0.0606925	0.0288466
ENSGALG00000000668	ENSGALG00000000668	RBBP5	RBBP5	chr26:2002935-2012259	ENSG00000117222	RBBP5	chr1:205086142-205122015	38.3638	45.0171	40.5889	35.2939	39.2383	38.2911	36.0319	38.3856	35.416	34.8924	35.6951	36.9754		37.8491	2.88351
ENSGALG00000000669	ENSGALG00000000669	-	ENSGALG00000000669	chr25:1335269-1343139	ENSG00000253831	ETV3L	chr1:157092044-157099808	47.3268	45.1735	35.9055	41.9687	38.5756	30.181	44.7427	39.263	28.2508	31.2241	42.3395	57.4929		40.2037	8.24953
ENSGALG00000000672	ENSGALG00000000672	SCMH1	SCMH1	chr23:1265739-1281882	ENSG00000010803	SCMH1	chr1:41027200-41242154	4.26312	4.53882	4.21461	3.86739	3.43323	3.94077	3.82087	5.6153	5.23746	3.70251	5.57387	5.96337		4.51428	0.861666
ENSGALG00000000674	ENSGALG00000000674	MYO1D	MYO1D	chr27:1585858-1658806	ENSG00000176658	MYO1D	chr17:32492522-32877177	1.3535	3.28538	8.0757	1.16416	3.11777	5.94919	1.09022	3.57938	7.05182	3.33589	2.07514	1.10895		3.43226	2.39961
ENSGALG00000000678	ENSGALG00000000678	CITED4	CITED4	chr23:1422977-1425194	ENSG00000179862	CITED4	chr1:40861051-40862366	17.5924	19.8021	62.5292	19.1439	24.9121	37.9213	14.9824	22.5054	65.2007	30.5383	56.891	31.3409		33.6133	18.1206
ENSGALG00000000681	ENSGALG00000000681	PAK1	PAK1	chr1:193148136-193175598	ENSG00000149269	PAK1	chr11:77321707-77474635	24.7227	39.9495	48.5846	26.2116	38.9746	38.9483	27.7843	49.4579	60.6885	53.5087	38.119	26.2518		39.4335	11.8216
ENSGALG00000000684	ENSGALG00000000684	KLHDC8A	KLHDC8A	chr26:2090691-2093563	ENSG00000162873	KLHDC8A	chr1:205336065-205357090	3.21273	2.92093	0.31312	2.7959	2.27808	0.912984	2.02507	2.14265	0.264415	1.92747	3.52253	0.73977		1.9213	1.12522
ENSGALG00000000685	ENSGALG00000000685	MAP3K14	MAP3K14	chr27:1563066-1577397	ENSG00000006062	MAP3K14	chr17:45263121-45317040	4.09602	3.32792	1.96781	4.13387	1.79788	2.44556	4.27902	2.49479	1.15322	2.10258	1.21288	3.64226		2.72115	1.13589
ENSGALG00000000690	ENSGALG00000000690	GDPD4	GDPD4	chr1:193197286-193216890	ENSG00000178795	GDPD4	chr11:77216558-77301687	0.0374047	0.096021	0.495794	0.126688	0.144125	0.417452	0	0.209073	0.394048	0.126725	0.155412	0.0435177		0.187188	0.161846
ENSGALG00000000692	ENSGALG00000000692	CDK18	CDK18	chr26:2156418-2171476	ENSG00000117266	CDK18	chr1:205504595-205532793	1.92219	3.51708	2.59354	1.75456	2.73144	4.85173	1.40723	2.68774	1.77723	1.84745	2.11462	0.586838		2.31597	1.09116
ENSGALG00000000693	ENSGALG00000000693	NOB1	NOB1	chr11:19281498-19283690	ENSG00000141101	NOB1	chr16:69741867-69754940	116.043	119.628	110.325	113.254	120.097	105.719	116.089	131.542	161.629	144.103	104.757	149.394		124.382	18.3087
ENSGALG00000000695	ENSGALG00000000695	MFSD4A	MFSD4A	chr26:2177658-2191981	ENSG00000174514	MFSD4A	chr1:205568885-205602918	0.417035	1.13354	0.898974	0.664694	0.661657	0.532352	0.84409	2.79222	1.2437	5.6931	7.72934	1.39849		2.00077	2.3269
ENSGALG00000000699	ENSGALG00000000699	WWP2	WWP2	chr11:19283822-19315488	ENSG00000198373	WWP2	chr16:69762306-69941741	21.3566	25.469	21.4034	17.6335	17.511	17.7264	16.1702	20.2343	19.8548	20.396	23.7751	24.2246		20.4796	2.93758
ENSGALG00000000703	ENSGALG00000000703	SLC45A3	SLC45A3	chr26:2227360-2246179	ENSG00000158715	SLC45A3	chr1:205657851-205680459	1.3824	0.907817	0.751991	1.03442	0.701948	0.697656	0.801037	0.898477	0.275176	0.544378	5.38753	1.60833		1.24926	1.35027
ENSGALG00000000707	ENSGALG00000000707	PSMD7	PSMD7	chr11:19316619-19321784	ENSG00000103035	PSMD7	chr16:74296775-74306288	337.054	360.588	333.414	371.282	389.076	301.425	345.9	332.868	426.612	397.912	337.151	377.053		359.195	34.7091
ENSGALG00000000708	ENSGALG00000000708	NUCKS1	NUCKS1	chr26:2263741-2277078	ENSG00000069275	NUCKS1	chr1:205712819-205750276	285.173	220.249	175.869	329.5	321.871	128.265	287.906	180.967	236.671	339.915	409.575	359.542		272.959	85.0273
ENSGALG00000000712	ENSGALG00000000712	RAB29	RAB29	chr26:2278557-2284352	ENSG00000117280	RAB29	chr1:205767986-205775460	1.06949	0.712769	0.33676	1.54413	0.554734	0.331555	1.17134	0.731562	0.487506	1.60265	4.8709	1.92624		1.2783	1.24711
ENSGALG00000000713	ENSGALG00000000713	ZFHX3	ZFHX3	chr11:19692862-19834198	ENSG00000140836	ZFHX3	chr16:72782885-73144447	2.37448	1.41878	1.94654	1.93234	1.76434	1.88101	1.96147	2.15716	1.91	2.18598	2.7088	1.56588		1.9839	0.345333
ENSGALG00000000719	ENSGALG00000000719	RPL22	RPL22	chr21:622371-626856				1297.9	1375.93	1488.8	1386.29	1801.27	1273.48	1414.63	1445.36	2223.13	2033.38	1494.56	1468.26		1558.58	299.834
ENSGALG00000000720	ENSGALG00000000720	-	ENSGALG00000000720	chr23:1432742-1440630				1.72381	1.99012	5.36889	1.67115	2.20799	4.008	1.51174	2.10412	5.311	2.68202	0.81094	0.991864		2.5318	1.54693
ENSGALG00000000721	ENSGALG00000000721	SLC41A1	SLC41A1	chr26:2287190-2302856	ENSG00000133065	SLC41A1	chr1:205789093-205813748	13.0088	13.9439	11.7298	10.6812	10.0143	13.0621	9.92013	11.5015	8.2574	8.61893	7.65615	10.6072		10.7501	1.99443
ENSGALG00000000722	ENSGALG00000000722	-	ENSGALG00000000722	chr28:900939-906771				0	0.0267977	0.0325569	0.0235708	0.080445	0.0517792	0	0.0636527	0.109971	0.0707331	0	0.07287		0.0443647	0.0360882
ENSGALG00000000723	ENSGALG00000000723	STX12	STX12	chr23:1440705-1453368	ENSG00000117758	STX12	chr1:27773183-27824452	20.1935	24.7757	31.397	18.7581	21.626	23.9545	20.4185	19.5713	27.4323	23.1569	28.1523	19.6414		23.2565	4.01655
ENSGALG00000000724	ENSGALG00000000724	PM20D1	PM20D1	chr26:2309019-2320200	ENSG00000162877	PM20D1	chr1:205828022-205850132	7.90257	6.09383	4.63315	8.74895	4.99623	5.44419	8.89182	5.2607	4.22172	7.41399	10.2943	6.75895		6.7217	1.9355
ENSGALG00000000726	ENSGALG00000000726	ELAVL1	ELAVL1	chr28:919938-942567	ENSG00000066044	ELAVL1	chr19:7958579-8005659	96.3043	113.611	144.691	99.2277	113.131	133.582	103.614	125.155	131.676	119.037	127.51	86.7551		116.191	17.3073
ENSGALG00000000729	ENSGALG00000000729	PPP1R8	PPP1R8	chr23:1454059-1471678	ENSG00000117751	PPP1R8	chr1:27830778-27851676	27.5381	28.1572	33.7692	29.0605	28.6759	26.2103	28.4042	30.9146	38.0737	31.0884	25.97	26.768		29.5525	3.49932
ENSGALG00000000731	ENSGALG00000000731	THEMIS2	THEMIS2	chr23:1481725-1483948	ENSG00000130775	THEMIS2	chr1:27872543-27886685	0.34711	0.140694	0.569776	0.206255	0.0233142	0.521045	0.0867051	0.167095	0.288684	0.144412	0.303625	0.233799		0.25271	0.165044
ENSGALG00000000734	ENSGALG00000000734	-	RPA2	chr23:1486449-1490280	ENSG00000204086	RPA4	chrX:96883908-96885467	195.297	208.026	192.89	219.934	210.988	187.553	205.826	198.637	239.37	213.556	169.573	197.313		203.247	17.5452
ENSGALG00000000736	ENSGALG00000000736	MATK	MATK	chr28:949225-953352	ENSG00000007264	MATK	chr19:3777970-3802129	0.20598	0.235007	0.321203	0.18087	0.0881847	0.227044	0.10862	0.279107	0.391794	0.827076	0.729033	0.159762		0.312807	0.234125
ENSGALG00000000737	ENSGALG00000000737	SMPDL3B	SMPDL3B	chr23:1490483-1496253	ENSG00000130768	SMPDL3B	chr1:27934993-27959157	11.5237	13.984	16.3925	10.9574	12.6236	12.9846	10.6236	12.3085	17.5689	11.856	8.93601	11.3713		12.5942	2.42097
ENSGALG00000000740	ENSGALG00000000740	APBA3	APBA3	chr28:975012-979463	ENSG00000011132	APBA3	chr19:3750819-3761699	8.63326	9.18667	7.76759	8.2595	6.49464	7.72518	8.06587	7.63613	8.39342	10.7025	13.4016	11.7487		9.00126	1.97868
ENSGALG00000000745	ENSGALG00000000745	SLC26A9	SLC26A9	chr26:2323803-2335164	ENSG00000174502	SLC26A9	chr1:205913048-205943460	1.16078	0.398465	0.0210479	1.24955	0.398723	0.117162	0.464428	0.0685853	0.017774	0.0914572	0.261709	0.0942202		0.361992	0.423696
ENSGALG00000000747	ENSGALG00000000747	CHD5	CHD5	chr21:626922-654242	ENSG00000116254	CHD5	chr1:6101793-6180123	1.65316	1.31391	1.81958	1.70956	1.71629	1.46461	1.59477	1.44775	1.49399	1.30475	1.44972	1.64393		1.551	0.163504
ENSGALG00000000748	ENSGALG00000000748	TJP3	TJP3	chr28:980789-991145	ENSG00000105289	TJP3	chr19:3708109-3750813	16.5977	14.8757	6.9597	16.9158	17.1968	11.3366	15.9229	14.2446	9.70949	9.39523	5.41211	8.75782		12.277	4.1765
ENSGALG00000000751	ENSGALG00000000751	ARNT	ARNT	chr25:2368226-2727336	ENSG00000143437	ARNT	chr1:150809705-150876768	126.742	129.16	141.338	124.913	160.285	137.898	139.533	149.895	197.163	166.065	132.786	154.522		146.692	20.691
ENSGALG00000000755	ENSGALG00000000755	ACER3	ACER3	chr1:193390264-193443628	ENSG00000078124	ACER3	chr11:76860867-77026797	5.94836	6.19051	5.97498	4.96107	4.85237	8.63884	3.84678	5.88174	3.45782	4.47837	6.67966	4.30193		5.43437	1.42491
ENSGALG00000000761	ENSGALG00000000761	TSKU	TSKU	chr1:193483507-193498274	ENSG00000182704	TSKU	chr11:76782251-76798154	69.3517	65.9452	39.7589	65.6281	54.5727	45.8396	60.2672	67.5153	31.8583	62.5212	82.5368	56.3082		58.5086	13.9605
ENSGALG00000000764	ENSGALG00000000764	SSR2	SSR2	chr25:2368226-2727336	ENSG00000163479	SSR2	chr1:156009048-156020959	242.903	273.775	301.276	259.335	261.813	272.394	259.897	281.185	388.914	346.953	323.105	282.007		291.13	42.4365
ENSGALG00000000769	ENSGALG00000000769	RAB7B	RAB7B	chr26:2348766-2351790	ENSG00000276600	RAB7B	chr1:205976740-206003461	0.841155	0.522414	0.338501	0.888381	0.313651	0.336474	0.93364	0.579084	0.714622	0.827355	0.826751	0.599801		0.643486	0.228128
ENSGALG00000000775	ENSGALG00000000775	CTSS	CTSS	chr25:2368226-2727336	ENSG00000163131	CTSS	chr1:150730196-150765957	0.42895	0.724441	0.387259	0.331347	0.260967	0.447931	0.589309	0.825969	0.505399	0.586401	0.875486	0.866776		0.569186	0.212394
ENSGALG00000000776	ENSGALG00000000776	BRPF3	BRPF3	chr26:188924-194291	ENSG00000096070	BRPF3	chr6:36196744-36232790	25.5255	25.2723	27.2166	22.2291	26.9699	24.6188	22.3693	25.6081	33.0144	26.1366	25.557	24.9168		25.7862	2.7416
ENSGALG00000000777	ENSGALG00000000777	EYA3	EYA3	chr23:1499031-1528963	ENSG00000158161	EYA3	chr1:27970344-28088696	39.5412	40.9267	37.7958	41.8352	37.4598	40.2003	40.2086	38.0554	40.9972	38.1262	32.909	38.0883		38.8453	2.37518
ENSGALG00000000783	ENSGALG00000000783	PTAFR	PTAFR	chr23:1546989-1548057	ENSG00000169403	PTAFR	chr1:28147166-28193936	1.03877	0.222218	0.161986	0.586378	0.311306	0.3435	0.575168	0.140756	0.0455965	0.11731	0.0959108	0.5237		0.346883	0.289106
ENSGALG00000000784	ENSGALG00000000784	PIPKIgamma87	PIP5K1C	chr28:992123-1022893	ENSG00000186111	PIP5K1C	chr19:3630183-3700479	48.9295	52.7934	52.8585	47.6594	49.6953	54.6686	45.993	51.5169	56.6887	53.0385	73.0292	52.8414		53.3094	6.90066
ENSGALG00000000785	ENSGALG00000000785	HYAL1	HYAL1	chr12:1444893-1447241	ENSG00000114378	HYAL1	chr3:50299889-50312381	4.74381	5.82102	6.51779	3.58164	5.99543	5.76759	4.33529	7.00384	8.70887	22.0135	20.3558	5.21406		8.33822	6.15282
ENSGALG00000000786	ENSGALG00000000786	CTSE	CTSE	chr26:2355278-2358720	ENSG00000196188	CTSE	chr1:206009264-206023909	0.0314559	0	0.0981163	0.0355131	0.040401	0	0.0373223	0.0319676	0.124287	0.0355235	0.130717	0		0.0471086	0.0458158
ENSGALG00000000787	ENSGALG00000000787	DHX38	DHX38	chr11:19949491-19959954	ENSG00000140829	DHX38	chr16:72093562-72112912	60.3548	61.1126	59.3379	58.0161	67.409	69.7833	62.5794	65.1658	68.7822	62.0647	54.6191	67.2429		63.039	4.68714
ENSGALG00000000788	ENSGALG00000000788	AVPR1B	AVPR1B	chr26:2366152-2368135	ENSG00000198049	AVPR1B	chr1:206109692-206117699	0	0.0357666	0.0869068	0.0314597	0	0	0	0.0566378	0.110083	0	0	0		0.0267378	0.0388106
ENSGALG00000000790	ENSGALG00000000790	DNAJC8	DNAJC8	chr23:1558285-1572115	ENSG00000126698	DNAJC8	chr1:28199456-28233025	207.712	230.394	240.407	236.108	248.814	213.877	233.934	227.487	299.481	269.421	218.453	221.938		237.335	25.6062
ENSGALG00000000791	ENSGALG00000000791	-	ENSGALG00000000791	chr26:2383707-2464057	ENSG00000188610	FAM72B	chr1:121167646-121185539	40.8866	50.6314	40.0725	41.8671	37.9167	35.731	38.7514	43.3459	39.7816	38.8246	35.9416	43.367		40.5931	4.01857
ENSGALG00000000793	ENSGALG00000000793	VPS72	VPS72	chr25:2368226-2727336	ENSG00000163159	VPS72	chr1:151169987-151195321	115.367	119.497	129.475	111.865	129.192	112.211	127.897	141.777	182.214	169.977	196.748	157.785		141.167	28.8714
ENSGALG00000000795	ENSGALG00000000795	MFSD12	MFSD12	chr28:1047525-1053915	ENSG00000161091	MFSD12	chr19:3538261-3574290	10.0947	10.0652	7.56805	10.6591	5.34423	7.5888	10.6531	7.61842	10.0539	10.9863	7.68728	11.7538		9.17274	1.93387
ENSGALG00000000802	ENSGALG00000000802	DHODH	DHODH	chr11:19961317-19964884	ENSG00000102967	DHODH	chr16:72008588-72027664	47.7699	50.0542	54.1154	45.923	58.9319	50.4127	46.9778	49.0782	73.1055	61.854	41.0069	55.0341		52.8553	8.5877
ENSGALG00000000803	ENSGALG00000000803	-	ENSGALG00000000803	chr28:1957156-1958826				5.80809	4.69146	4.06008	6.67029	5.98065	2.98026	6.00018	6.36053	5.8681	4.41046	19.3472	11.8253		7.00022	4.45004
ENSGALG00000000806	ENSGALG00000000806	LINGO3	LINGO3	chr28:1980343-1982161	ENSG00000220008	LINGO3	chr19:2289784-2292024	0.463797	0.309557	0.578594	0.523618	0.166792	0.552124	0.352189	0.603317	0.513026	0.691378	2.92907	0.884935		0.714033	0.721502
ENSGALG00000000808	ENSGALG00000000808	-	ENSGALG00000000808	chr1:193584081-193629631				0.438122	0.196124	0.118081	0.277839	0.303855	0.457756	0.336915	0.283832	0.116823	0.421269	0.458815	0.363401		0.314403	0.122472
ENSGALG00000000811	ENSGALG00000000811	IST1	IST1	chr11:19965163-19972343	ENSG00000182149	IST1	chr16:71845996-71931199	88.3074	98.7603	92.1541	88.531	90.2801	83.8566	83.8093	87.9849	87.8506	79.1533	80.9313	98.2824		88.3251	6.07572
ENSGALG00000000812	ENSGALG00000000812	OAZ1	OAZ1	chr28:1993418-1997365	ENSG00000104904	OAZ1	chr19:2269509-2273490	913.851	1010.39	957.042	1132.05	1160.13	1014.02	1140.7	1037.06	1068.41	1004.05	822.589	1012.49		1022.73	97.2095
ENSGALG00000000814	ENSGALG00000000814	HNRNPR	HNRNPR	chr23:1578984-1658220	ENSG00000125944	HNRNPR	chr1:23303771-23344336	95.3763	112.551	126.26	97.852	129.728	109.642	105.73	111.053	110.183	93.5605	75.0924	79.7062		103.895	16.515
ENSGALG00000000816	ENSGALG00000000816	-	ENSGALG00000000816	chr26:2383707-2464057	ENSG00000196369	SRGAP2B	chr1:144887265-145095528	4.80761	5.2729	5.9698	4.39386	4.6719	6.3244	5.02515	7.49676	5.92889	6.75071	7.60955	4.42434		5.72299	1.14065
ENSGALG00000000817	ENSGALG00000000817	ZNF821	ZNF821	chr11:19972950-19984338	ENSG00000102984	ZNF821	chr16:71859680-71895336	15.533	17.0423	18.4154	13.9331	17.5179	15.5149	13.936	17.5156	21.1269	17.806	16.8565	19.9035		17.0918	2.1684
ENSGALG00000000818	ENSGALG00000000818	LRRC32	LRRC32	chr1:193661420-193663418	ENSG00000137507	LRRC32	chr11:76657524-76670747	0.0333843	0	0	0	0.0428778	0.0413981	0.0198052	0.0169637	0.0879235	0.0942533	0.254298	0.0582604		0.054097	0.0706496
ENSGALG00000000820	ENSGALG00000000820	HTR1D	HTR1D	chr23:1671070-1672207	ENSG00000179546	HTR1D	chr1:23191895-23194729	5.51595	3.58114	3.15056	3.47576	3.13037	3.73815	3.23428	3.61762	2.19597	1.77461	1.51011	3.8803		3.23373	1.06182
ENSGALG00000000824	ENSGALG00000000824	-	ENSGALG00000000824	chr27:1532894-1536253				1.89775	0.72557	0.598165	1.54991	0.855689	0.675948	1.79655	1.00535	0.638051	3.96712	4.52965	2.86557		1.75878	1.35076
ENSGALG00000000830	ENSGALG00000000830	EMSY	EMSY	chr1:193751651-193786714	ENSG00000158636	EMSY	chr11:76444923-76553025	28.5559	29.7807	30.2406	25.5609	24.436	40.4873	26.0599	31.9637	25.318	20.3392	18.4964	19.9582		26.7664	6.06906
ENSGALG00000000835	ENSGALG00000000835	-	PLEKHJ1	chr28:2029445-2035954	ENSG00000104886	PLEKHJ1	chr19:2230084-2237704	52.9067	55.3572	49.4289	47.8397	50.9306	46.0777	47.7459	47.3343	52.1646	49.0419	65.9808	60.2961		52.092	5.91653
ENSGALG00000000836	ENSGALG00000000836	RFX5	RFX5	chr25:2727343-2731219	ENSG00000143390	RFX5	chr1:151340640-151347357	6.71731	9.49482	9.11145	7.25467	8.71663	10.1368	6.2081	6.92531	13.9629	10.3758	8.99567	6.20042		8.67499	2.23767
ENSGALG00000000838	ENSGALG00000000838	THAP12	THAP12	chr1:193796219-193809102	ENSG00000137492	THAP12	chr11:76349956-76380971	13.3689	10.3795	9.01002	13.715	10.9296	10.9721	11.6457	9.6186	6.16006	6.566	6.42852	11.588		10.0318	2.57153
ENSGALG00000000839	ENSGALG00000000839	WNT11	WNT11	chr1:193938734-193964975	ENSG00000085741	WNT11	chr11:76186325-76210736	8.84468	6.7642	1.58037	9.17417	6.08225	2.01076	4.32886	2.54676	1.64999	1.97687	2.57751	5.35946		4.40799	2.79189
ENSGALG00000000843	ENSGALG00000000843	DOT1L	DOT1L	chr28:2041019-2096657	ENSG00000104885	DOT1L	chr19:2164149-2232578	23.0453	17.5942	16.9804	21.3043	18.6863	23.4379	20.4166	21.0944	14.31	14.9752	16.673	20.1357		19.0544	2.99667
ENSGALG00000000845	ENSGALG00000000845	UVRAG	UVRAG	chr1:194108534-194189490	ENSG00000198382	UVRAG	chr11:75815167-76143195	5.97233	6.35775	5.22988	6.56789	6.47782	5.87038	5.52507	5.49268	4.41639	5.05482	7.1817	6.75328		5.90833	0.799805
ENSGALG00000000847	ENSGALG00000000847	GARNL3	GARNL3	chr17:10901975-10937573	ENSG00000136895	GARNL3	chr9:127224265-127393660	19.7184	15.4623	15.791	18.7927	22.0174	19.6383	16.6925	16.9463	12.6256	12.664	16.3446	19.5236		17.1847	2.87603
ENSGALG00000000848	ENSGALG00000000848	AP1G1	AP1G1	chr11:19994787-20036521	ENSG00000166747	AP1G1	chr16:71729000-71809201	73.7236	109.471	52.6335	69.1324	75.1301	68.5898	67.9667	89.7958	48.3285	52.842	40.4045	55.3516		66.9475	19.1672
ENSGALG00000000853	ENSGALG00000000853	SLC2A8	SLC2A8	chr17:10878730-10887869	ENSG00000136856	SLC2A8	chr9:127397138-127408424	9.94494	9.2736	8.42347	10.0299	9.78564	8.56058	10.8242	9.20506	12.9268	11.2871	8.42215	9.71806		9.86679	1.31513
ENSGALG00000000855	ENSGALG00000000855	ZMPSTE24	ZMPSTE24	chr23:1748473-1762655	ENSG00000084073	ZMPSTE24	chr1:40258107-40294184	84.3356	88.4465	92.5173	88.7687	94.0652	88.2582	85.7876	86.0191	92.3729	84.0171	69.8846	72.8841		85.6131	7.40744
ENSGALG00000000856	ENSGALG00000000856	EIF2D	EIF2D	chr26:2506266-2516101	ENSG00000143486	EIF2D	chr1:206571292-206612463	52.174	39.9821	43.7066	56.4844	48.5547	42.478	63.7423	48.1908	58.1775	67.0077	62.9656	60.4804		53.662	9.09889
ENSGALG00000000857	ENSGALG00000000857	NMT1	NMT1	chr27:1496711-1506683	ENSG00000136448	NMT1	chr17:45051610-45109016	97.2711	104.799	111.28	103.469	112.925	108.292	113.092	117.931	150.636	132.218	101.703	102.607		113.019	15.0042
ENSGALG00000000862	ENSGALG00000000862	RLF	RLF	chr23:1766444-1795825	ENSG00000117000	RLF	chr1:40161373-40240921	20.2864	18.2584	19.1336	23.0628	21.2779	23.076	21.0199	18.9892	16.6881	17.1161	20.3724	19.8255		19.9255	2.04031
ENSGALG00000000863	ENSGALG00000000863	DYRK3	DYRK3	chr26:2516670-2522793	ENSG00000143479	DYRK3	chr1:206635536-206684419	8.22717	4.80693	4.10044	7.21925	3.94014	4.76755	7.53977	6.88315	4.72177	8.2562	14.4843	9.98889		7.07796	3.03115
ENSGALG00000000864	ENSGALG00000000864	FBXW2	FBXW2	chr17:10869140-10878707	ENSG00000119402	FBXW2	chr9:120751978-120793412	39.3662	36.563	40.7685	38.0792	40.8057	40.9213	38.2517	42.2581	39.1764	34.6264	28.6417	32.9997		37.7048	3.93704
ENSGALG00000000866	ENSGALG00000000866	-	SELENBP1	chr25:2758035-2768002	ENSG00000143416	SELENBP1	chr1:151364302-151372733	1.63598	2.17343	6.89834	1.4614	1.9759	3.66779	1.71024	2.45601	5.58469	3.58704	2.7118	0.954858		2.90146	1.77704
ENSGALG00000000868	ENSGALG00000000868	RNF121	RNF121	chr1:194214929-194221742	ENSG00000137522	RNF121	chr11:71928701-71997597	24.7395	31.1468	33.4014	28.5465	32.9223	25.2228	29.5439	32.1335	38.7998	36.4209	40.5633	30.6906		32.0109	4.87097
ENSGALG00000000870	ENSGALG00000000870	DCAKD	DCAKD	chr27:1489882-1496485	ENSG00000172992	DCAKD	chr17:45023340-45061109	1.71948	1.16749	1.37176	1.92335	1.10097	1.24617	1.65257	1.11747	1.73761	1.90405	3.16295	2.92815		1.75267	0.674625
ENSGALG00000000871	ENSGALG00000000871	MADPRT	MADPRT1	chr1:194211171-194212413	ENSG00000129744	ART1	chr11:3645128-3664416	0.173787	0	0.0676476	0.147133	0	0.0537941	0	0	0.22885	0.0980893	0	0		0.0641084	0.0809013
ENSGALG00000000875	ENSGALG00000000875	PHLPP2	PHLPP2	chr11:20040535-20066522	ENSG00000040199	PHLPP2	chr16:71637835-71724701	10.6251	11.9511	11.5103	9.07934	10.5797	12.5518	8.74897	12.2097	10.3528	8.1492	8.01808	9.48741		10.272	1.58042
ENSGALG00000000881	ENSGALG00000000881	GPATCH3	GPATCH3	chr23:1831567-1836134	ENSG00000198746	GPATCH3	chr1:26890488-26900466	25.1699	26.5678	26.4571	26.0728	37.8906	26.311	26.9748	24.5043	33.9858	31.0846	30.3257	32.9061		29.0209	4.18243
ENSGALG00000000883	ENSGALG00000000883	MAPKAPK2	MAPKAPK2	chr26:2534864-2552591	ENSG00000162889	MAPKAPK2	chr1:206684944-206734283	183.707	146.723	65.2991	176.984	127.563	74.8164	195.021	151.557	66.1145	117.966	125.424	233.048		138.685	53.3106
ENSGALG00000000884	ENSGALG00000000884	CXXC5	CXXC5	chr13:1027564-1056195	ENSG00000171604	CXXC5	chr5:139647299-139683882	15.4184	14.9425	19.3986	14.8136	14.6021	18.516	15.499	14.8383	22.0211	20.556	23.2412	20.2484		17.8413	3.17821
ENSGALG00000000887	ENSGALG00000000887	NR0B2	NR0B2	chr23:1837227-1839682	ENSG00000131910	NR0B2	chr1:26911489-26913966	0.362141	0.338094	0.153956	0.501832	0.147949	0.142844	0.292946	0.351301	0.108395	0.650713	0.980423	0.689524		0.393343	0.267605
ENSGALG00000000891	ENSGALG00000000891	NSUN5	NSUN5	chr19:305335-328817	ENSG00000130305	NSUN5	chr7:73302517-73308867	23.3041	27.1231	25.4111	23.6011	29.2585	25.051	24.7276	21.7107	28.716	26.735	21.046	26.5815		25.2721	2.56915
ENSGALG00000000892	ENSGALG00000000892	IL10	IL10	chr26:2562266-2564556	ENSG00000136634	IL10	chr1:206767602-206772494	0	0	0	0.0889041	0.10114	0	0	0	0	0.08893	0	0.27485		0.046152	0.0831342
ENSGALG00000000893	ENSGALG00000000893	TAT	TAT	chr11:20080988-20088163	ENSG00000198650	TAT	chr16:71565660-71577130	0.308568	0.19803	0.120295	0.319337	0.165132	0.127546	0.152548	0.078397	0.0677224	0.174235	0.534194	0.388914		0.219577	0.140397
ENSGALG00000000894	ENSGALG00000000894	APCDD1	APCDD1	chr2:98537291-98568148	ENSG00000154856	APCDD1	chr18:10454628-10489948	1.36935	1.32323	0.649539	1.21679	1.03653	0.684389	1.18612	1.02652	0.575932	1.42883	3.36034	0.793544		1.22093	0.734777
ENSGALG00000000895	ENSGALG00000000895	NUDC	NUDC	chr23:1841075-1849961	ENSG00000090273	NUDC	chr1:26900238-26946862	289.059	342.089	297.409	331.758	350.839	296.217	306.65	307.397	389.437	323.136	249.552	308.48		316.002	35.2688
ENSGALG00000000901	ENSGALG00000000901	CHST4	CHST4	chr11:20098882-20100019	ENSG00000140835	CHST4	chr16:71525233-71538746	0.0962084	0.205812	0.150027	0.108618	0.0411891	0.0397676	0.0761008	0.228138	0.168921	0.144866	0.399735	0.261174		0.160046	0.103212
ENSGALG00000000902	ENSGALG00000000902	KDF1	KDF1	chr23:1855767-1858613	ENSG00000175707	KDF1	chr1:26949562-26960406	21.0341	20.8522	16.6669	17.9552	17.3515	19.2974	17.6525	17.3501	11.5598	14.098	22.421	17.7735		17.8344	2.98079
ENSGALG00000000903	ENSGALG00000000903	TERF2IP	TERF2IP	chr11:20106414-20141797	ENSG00000166848	TERF2IP	chr16:75647786-75761872	24.3358	26.8151	28.2788	27.4837	28.8203	26.3334	29.1035	24.9642	22.2289	22.9738	22.8607	28.3753		26.0478	2.49449
ENSGALG00000000905	ENSGALG00000000905	PSMB4	PSMB4	chr25:2799649-2802045	ENSG00000159377	PSMB4	chr1:151399534-151401944	495.616	540.391	604.334	559.102	737.367	561.758	569.752	560.631	972.935	836.468	697.662	569.58		642.133	142.413
ENSGALG00000000906	ENSGALG00000000906	-	RALGPS1	chr17:10765225-10860650				1.61214	1.33079	1.45702	1.48743	1.6956	2.25536	1.66403	1.15308	0.746681	0.627212	1.23258	0.828059		1.34083	0.461967
ENSGALG00000000907	ENSGALG00000000907	KARS	KARS	chr11:20106414-20141797	ENSG00000065427	KARS	chr16:75627474-75648643	269.776	317.244	338.29	307.795	364.518	326.302	311.736	338.976	451.141	399.832	373.669	301.527		341.734	49.1638
ENSGALG00000000908	ENSGALG00000000908	ADAT1	ADAT1	chr11:20106414-20141797	ENSG00000065457	ADAT1	chr16:75596981-75623300	3.99829	4.26774	3.24026	4.01666	3.25447	3.0096	3.6213	2.74291	2.70585	3.4215	3.08492	4.21488		3.46486	0.553186
ENSGALG00000000909	ENSGALG00000000909	GFAP	GFAP	chr27:1466575-1470293	ENSG00000131095	GFAP	chr17:44903161-44916937	0.138172	0.177349	0.258557	0.0623974	0.0354927	0.102804	0.0983644	0.0280839	0.14556	0.124831	0.114818	0.289355		0.131315	0.0799643
ENSGALG00000000911	ENSGALG00000000911	IL19	IL19	chr26:2575865-2577627	ENSG00000142224	IL19	chr1:206798870-206842981	0.11413	0	0	0.12885	0	0	0.135415	0	0.15029	0.386663	0	0		0.076279	0.116868
ENSGALG00000000913	ENSGALG00000000913	-	CHST6	chr11:20162332-20168892	ENSG00000135702	CHST5	chr16:75528535-75535247	22.551	25.0816	33.6631	26.8961	31.1238	33.6969	23.4325	33.1975	40.8971	31.9939	29.7225	20.7906		29.4206	5.83563
ENSGALG00000000914	ENSGALG00000000914	-	ENSGALG00000000914	chr27:1463366-1464611				0	0	0	0	0.110767	0	0	0	0	0	0.0796285	0		0.0158663	0.0376457
ENSGALG00000000918	ENSGALG00000000918	-	ENSGALG00000000918	chr27:1458649-1462141	ENSG00000167131	CCDC103	chr17:44899142-44905390	2.54807	2.58919	2.0695	2.69693	2.59086	2.76476	2.39343	2.10399	4.12434	3.17731	2.57322	2.90274		2.71119	0.540241
ENSGALG00000000919	ENSGALG00000000919	PIGR	PIGR	chr26:2579725-2590284	ENSG00000162896	PIGR	chr1:206928518-206946466	0.0282003	0	0	0.0636767	0.0181091	0.0174841	0.0334596	0.0143289	0.0165655	0	0.058585	0.0292714		0.0233067	0.0210053
ENSGALG00000000920	ENSGALG00000000920	CGN	CGN	chr25:2806614-2815037	ENSG00000143375	CGN	chr1:151510510-151538692	52.3974	43.9147	21.0567	45.9697	57.3937	27.8788	45.5195	25.3806	18.9821	37.1964	43.452	49.9081		39.0875	12.8164
ENSGALG00000000927	ENSGALG00000000927	ANGPTL2	ANGPTL2	chr17:10765225-10860650	ENSG00000136859	ANGPTL2	chr9:127087332-127122883	0.408976	0.489942	0.85034	0.646418	0.472749	0.591674	0.54995	0.51261	0.789881	0.431071	0.490894	0.253768		0.540689	0.163482
ENSGALG00000000934	ENSGALG00000000934	ZBTB43	ZBTB43	chr17:10730327-10734909	ENSG00000169155	ZBTB43	chr9:126805006-126838210	26.2499	28.0868	30.2556	29.3879	32.9535	29.0402	26.3018	29.4874	31.6189	26.7196	26.5976	24.1817		28.4067	2.52436
ENSGALG00000000943	ENSGALG00000000943	WDTC1	WDTC1	chr23:1922622-1937829	ENSG00000142784	WDTC1	chr1:27234516-27308633	10.5255	11.9216	8.62188	8.02813	6.87999	11.3428	8.71589	9.75753	5.4245	7.26988	17.1588	9.03843		9.55708	3.03329
ENSGALG00000000944	ENSGALG00000000944	SUPT4H1	SUPT4H1	chr19:520175-523042	ENSG00000213246	SUPT4H1	chr17:58345175-58353093	107.671	116.82	107.561	109.991	109.838	110.945	114.1	120.766	167.037	134.394	131.362	129.863		121.696	17.1867
ENSGALG00000000946	ENSGALG00000000946	PFDN1	PFDN1	chr13:1458572-1511771	ENSG00000113068	PFDN1	chr5:140245039-140303121	121.111	148.91	188.152	127.815	219.731	170.676	151.917	174.086	253.785	228.049	195.565	131.977		175.981	42.4488
ENSGALG00000000949	ENSGALG00000000949	HBEGF	HBEGF	chr13:1515671-1521782	ENSG00000113070	HBEGF	chr5:140332843-140346631	7.27802	6.39495	8.22634	7.00354	9.59862	5.33025	7.24444	5.46044	10.0986	8.43981	9.80919	8.24015		7.76036	1.59785
ENSGALG00000000950	ENSGALG00000000950	MVB12B	MVB12B	chr17:10448296-10497105	ENSG00000196814	MVB12B	chr9:126326849-126507041	19.0748	18.0165	15.2945	14.8042	13.694	17.6496	16.3275	14.9356	11.5291	11.1798	15.8251	15.6485		15.3316	2.3883
ENSGALG00000000955	ENSGALG00000000955	TMEM222	TMEM222	chr23:1945537-1950433	ENSG00000186501	TMEM222	chr1:27322145-27336400	35.6184	43.9581	42.7163	30.6395	35.6717	46.6555	31.2968	35.5786	40.4849	37.5866	40.0126	33.6419		37.8217	5.02479
ENSGALG00000000962	ENSGALG00000000962	PUS3	PUS3	chr24:308798-318129	ENSG00000110060	PUS3	chr11:125893485-125903221	52.413	60.6061	46.3859	52.1618	56.2744	44.4987	47.1534	52.2629	64.799	50.2681	37.7819	65.317		52.4935	8.24217
ENSGALG00000000966	ENSGALG00000000966	-	ENSGALG00000000966	chr21:674537-695542	ENSG00000131697	NPHP4	chr1:5862811-5992473	4.00452	3.23669	2.24308	3.39817	2.66858	2.71962	3.26067	2.68904	2.82957	3.86054	5.05421	6.27682		3.52013	1.15326
ENSGALG00000000972	ENSGALG00000000972	PBX3	PBX3	chr17:10212848-10309636	ENSG00000167081	PBX3	chr9:125747345-125967377	3.77856	3.08844	2.72136	3.29225	4.08822	2.87055	3.60912	2.90234	2.65187	2.5851	4.52651	4.61051		3.39374	0.72083
ENSGALG00000000975	ENSGALG00000000975	C1orf174	C1orf174	chr21:898338-900470	ENSG00000198912	C1orf174	chr1:3889125-3900293	25.9734	26.6636	34.3553	27.3223	35.6989	33.2371	25.5663	28.2267	30.5605	24.7198	21.2174	25.3841		28.2438	4.3575
ENSGALG00000000977	ENSGALG00000000977	MAPKAP1	MAPKAP1	chr17:10126236-10210950	ENSG00000119487	MAPKAP1	chr9:125437393-125707234	15.5919	16.7019	13.5574	16.4812	16.0746	16.4913	15.9153	15.6708	13.688	14.8245	14.6343	14.8722		15.3753	1.06175
ENSGALG00000000978	ENSGALG00000000978	CEP104	CEP104	chr21:905169-916809	ENSG00000116198	CEP104	chr1:3812081-3857214	5.21321	4.40411	5.61004	5.81485	5.60218	4.60665	5.59253	5.22523	5.10185	6.12803	7.18266	6.64263		5.59366	0.790377
ENSGALG00000000980	ENSGALG00000000980	-	ENSGALG00000000980	chr21:921617-923179	ENSG00000130764	LRRC47	chr1:3778558-3796504	46.7738	49.0124	42.5844	54.3164	42.8021	45.1195	52.5987	47.8221	53.2975	55.5809	42.5931	59.1747		49.3063	5.61989
ENSGALG00000000988	ENSGALG00000000988	EFTUD2	EFTUD2	chr27:1442515-1458168	ENSG00000108883	EFTUD2	chr17:44849943-44899662	184.69	175.082	161.571	184.175	194.005	161.136	189.999	184.324	223.281	211.006	161.824	198.763		185.821	19.5036
ENSGALG00000000990	ENSGALG00000000990	SRSF6	SRSF6	chr20:112209-116846	ENSG00000124193	SRSF6	chr20:43457928-43464247	345.148	377.206	348.056	362.512	381.099	363.49	382.786	378.723	365.037	358.943	312.922	343.969		359.991	20.2092
ENSGALG00000000991	ENSGALG00000000991	TAF12	TAF12	chr23:2257260-2263245	ENSG00000120656	TAF12	chr1:28589323-28643085	115.481	114.516	114.649	128.256	138.068	99.3637	128.94	119.984	137.76	132.081	152.737	141.573		126.951	14.7656
ENSGALG00000000993	ENSGALG00000000993	GAPVD1	GAPVD1	chr17:10083832-10113057	ENSG00000165219	GAPVD1	chr9:125261794-125367207	9.05882	5.76142	2.67808	8.95152	5.90493	4.83719	8.24815	4.82479	2.26877	4.53239	3.52471	6.08673		5.55646	2.27249
ENSGALG00000000994	ENSGALG00000000994	-	ENSGALG00000000994	chr23:2264038-2265225	ENSG00000188060	RAB42	chr1:28592200-28595443	10.5757	10.4691	19.1864	8.03788	12.3402	19.7144	7.79127	8.92131	21.9365	13.4264	11.1049	7.07684		12.5484	5.05185
ENSGALG00000000996	ENSGALG00000000996	-	AP3D1	chr28:2096717-2125319	ENSG00000065000	AP3D1	chr19:2100988-2164465	46.8293	45.345	48.1906	45.2487	48.7882	52.659	45.8378	47.9427	47.9541	42.089	42.4536	42.869		46.3506	3.05132
ENSGALG00000000997	ENSGALG00000000997	GJC1	GJC1	chr27:1428041-1439416	ENSG00000182963	GJC1	chr17:44798448-44830816	7.62046	8.42341	8.72306	8.05939	8.00302	9.09611	9.6283	10.0168	10.5538	12.9884	16.8127	8.56531		9.87423	2.62863
ENSGALG00000000998	ENSGALG00000000998	MTFR1L	MTFR1L	chr23:2267073-2275079	ENSG00000117640	MTFR1L	chr1:25818640-25832942	53.8271	62.782	60.3216	61.1574	59.7908	58.2868	56.6011	62.1182	74.2684	67.4569	69.2621	65.6402		62.626	5.7235
ENSGALG00000000999	ENSGALG00000000999	ZNF319	ZNF319	chr11:488688-502790	ENSG00000166188	ZNF319	chr16:57994668-58000453	9.22656	14.3548	16.9032	7.4786	7.51349	13.1216	9.18655	14.0322	15.3219	13.82	13.6125	12.3609		12.2444	3.12635
ENSGALG00000001000	ENSGALG00000001000	-	HSPA5	chr17:10076956-10081027	ENSG00000044574	HSPA5	chr9:125234853-125241330	182.252	177.188	180.768	203.881	208.597	169.592	192.417	181.333	210.658	227.779	239.777	213.267		198.959	21.8576
ENSGALG00000001003	ENSGALG00000001003	SEPN1	SEPN1	chr23:2277654-2291256	ENSG00000255054	AL020996.2	chr1:25811470-25823744	7.63562	9.5748	7.81907	7.74651	6.46265	10.4721	7.22267	7.20555	4.26289	5.12611	6.35964	5.77223		7.13832	1.74223
ENSGALG00000001006	ENSGALG00000001006	TP73	TP73	chr21:929104-957410	ENSG00000078900	TP73	chr1:3652520-3736201	2.22193	1.29633	0.918713	1.90039	1.34041	1.66987	1.91732	1.62513	1.35213	1.82491	3.56685	2.83964		1.8728	0.728084
ENSGALG00000001013	ENSGALG00000001013	PPP6C	PPP6C	chr17:10069934-10073726	ENSG00000119414	PPP6C	chr9:125146573-125189939	55.575	56.6587	54.295	54.4558	53.7013	50.7717	56.3179	62.0488	70.5707	60.689	60.4831	62.2339		58.1501	5.33421
ENSGALG00000001014	ENSGALG00000001014	ARPC5L	ARPC5L	chr17:10066625-10069746	ENSG00000136950	ARPC5L	chr9:124862130-124877733	99.8736	102.667	97.0447	105.84	121.775	97.4269	112.075	107.904	111.76	105.57	83.3615	114.956		105.021	10.0287
ENSGALG00000001017	ENSGALG00000001017	WRAP73	WRAP73	chr21:961079-974151	ENSG00000116213	WRAP73	chr1:3630767-3652761	17.1415	14.8239	16.6452	17.5622	16.2503	15.3099	17.5714	16.6498	18.8506	16.8639	20.7784	19.3584		17.3171	1.68252
ENSGALG00000001019	ENSGALG00000001019	BTBD2	BTBD2	chr28:2143379-2155407	ENSG00000133243	BTBD2	chr19:1985438-2034881	39.5935	44.793	42.4705	38.1378	41.2441	40.024	37.3777	39.1229	53.2352	47.2832	49.5429	53.4408		43.8555	5.74824
ENSGALG00000001021	ENSGALG00000001021	MYOCD	MYOCD	chr18:832278-865063	ENSG00000141052	MYOCD	chr17:12665890-12768949	0.607415	0.721891	1.14015	0.406377	0.491203	0.878759	0.42708	0.89165	0.50362	0.381089	0.23368	0.353342		0.586355	0.269457
ENSGALG00000001022	ENSGALG00000001022	CCDC43	CCDC43	chr27:1391411-1399208	ENSG00000180329	CCDC43	chr17:44673069-44689779	96.6316	82.6046	83.6905	104.981	123.053	83.4773	101.639	91.0453	106.598	95.2958	71.6597	104.82		95.458	13.9368
ENSGALG00000001024	ENSGALG00000001024	TPRG1L	TPRG1L	chr21:974182-977331	ENSG00000158109	TPRG1L	chr1:3625002-3630127	153.894	149.069	161.409	183.772	157.145	158.977	169.243	157.307	184.401	175.02	205.51	192.647		170.7	17.6068
ENSGALG00000001025	ENSGALG00000001025	GOLGA1	GOLGA1	chr17:10048761-10063018	ENSG00000136935	GOLGA1	chr9:124878357-124948492	6.86781	5.66023	5.31723	6.73341	6.49954	7.8291	6.09004	6.35504	3.91897	3.49696	3.90478	6.16788		5.73675	1.34111
ENSGALG00000001028	ENSGALG00000001028	RNF43	RNF43	chr19:527580-580075	ENSG00000108375	RNF43	chr17:58352500-58417595	2.21946	1.74133	2.38149	1.35859	1.90673	4.18164	1.23115	2.31336	1.78734	1.45823	0.237143	0.551125		1.78063	1.00443
ENSGALG00000001030	ENSGALG00000001030	SCAMP4	SCAMP4	chr28:2195248-2199827	ENSG00000227500	SCAMP4	chr19:1905214-1926013	45.4849	44.4424	31.4609	33.7556	36.9425	41.246	36.5536	37.1738	20.5837	24.8879	23.3477	44.2485		35.0106	8.49858
ENSGALG00000001031	ENSGALG00000001031	HSF5	HSF5	chr19:584203-609343	ENSG00000176160	HSF5	chr17:58420167-58488384	1.94601	1.87952	2.54461	1.6967	1.36157	2.50096	1.9203	2.15389	1.92828	2.17589	2.02729	2.14444		2.02329	0.322742
ENSGALG00000001034	ENSGALG00000001034	AAR2	AAR2	chr20:190156-256564	ENSG00000131043	AAR2	chr20:36236459-36270918	51.4285	61.1465	57.9312	58.0546	53.0482	56.2358	53.344	58.9172	71.9656	60.1716	50.4479	55.5125		57.3503	5.72995
ENSGALG00000001035	ENSGALG00000001035	-	ENSGALG00000001035	chr28:2204643-2216483				0.85234	1.06184	0.390922	0.311325	0.418569	0.435211	0.684115	0.331196	0.231081	0.56621	0.902703	1.1958		0.615109	0.319735
ENSGALG00000001036	ENSGALG00000001036	ELAC2	ELAC2	chr18:1062002-1078113	ENSG00000006744	ELAC2	chr17:12992391-13018187	65.6752	99.5642	54.8517	69.4754	72.2825	65.727	67.1069	69.5026	57.4503	60.0906	43.3698	70.1982		66.2745	13.3244
ENSGALG00000001037	ENSGALG00000001037	SCAI	SCAI	chr17:10012248-10043274	ENSG00000173611	SCAI	chr9:124942608-125143506	5.97157	5.79313	5.54932	5.95787	4.70439	7.0606	5.49932	6.33334	3.79464	4.41089	4.76029	6.24063		5.50633	0.927996
ENSGALG00000001038	ENSGALG00000001038	MAN1C1	MAN1C1	chr23:2297999-2325825	ENSG00000117643	MAN1C1	chr1:25617468-25786207	0.984736	2.06223	0.686975	0.994723	1.7973	1.06044	0.953159	1.44846	0.375371	1.96076	4.52215	0.934626		1.48174	1.08742
ENSGALG00000001042	ENSGALG00000001042	MTMR4	MTMR4	chr19:615600-657520	ENSG00000108389	MTMR4	chr17:58489529-58517905	13.0321	12.2733	8.12361	10.737	9.93618	13.6497	11.5407	11.1076	5.01397	5.95142	6.53177	11.0947		9.916	2.85632
ENSGALG00000001043	ENSGALG00000001043	REXO1	REXO1	chr28:2249191-2285122	ENSG00000079313	REXO1	chr19:1815246-1848463	40.2926	41.1868	44.9444	41.3109	43.068	35.4326	38.65	36.3589	48.0515	42.636	41.7901	37.6183		40.945	3.60491
ENSGALG00000001046	ENSGALG00000001046	DLGAP4	DLGAP4	chr20:341071-476413	ENSG00000080845	DLGAP4	chr20:36306336-36528637	53.623	55.6149	51.8124	55.0375	47.432	46.6198	56.3865	60.8312	75.2512	68.3987	67.7167	71.5459		59.1891	9.48872
ENSGALG00000001048	ENSGALG00000001048	OLFML2A	OLFML2A	chr17:9999212-10004942	ENSG00000185585	OLFML2A	chr9:124777158-124814885	32.5112	31.9007	28.594	32.0893	29.4102	30.7278	30.8596	26.6127	36.2585	26.8799	15.0568	34.3263		29.6023	5.37987
ENSGALG00000001049	ENSGALG00000001049	-	ENSGALG00000001049	chr19:657605-776272	ENSG00000204403	CASP12	chr11:104885718-104898670	4.82632	5.83591	7.38372	4.52576	6.7009	6.59773	5.05609	6.29498	10.9085	8.35293	8.97004	6.81462		6.85563	1.85002
ENSGALG00000001051	ENSGALG00000001051	LDLRAP1	LDLRAP1	chr23:2349303-2363415	ENSG00000157978	LDLRAP1	chr1:25543580-25568886	19.1154	20.0492	16.5528	14.1275	19.2863	23.5969	16.3319	17.1022	13.2394	11.354	11.2351	10.3918		16.0319	4.0799
ENSGALG00000001054	ENSGALG00000001054	-	C20H20ORF24	chr20:497109-501466	ENSG00000259399	TGIF2-C20orf24	chr20:36574553-36612384	229.361	241.041	274.205	238.027	307.595	263.665	237.165	215.918	304.629	257.973	225.518	222.627		251.477	30.8015
ENSGALG00000001055	ENSGALG00000001055	-	NSF	chr27:1314136-1370343	ENSG00000073969	NSF	chr17:46590669-46757464	23.3974	29.3397	25.6668	21.789	23.1507	25.1842	21.478	23.5346	21.7082	20.607	25.3075	18.3432		23.2922	2.85569
ENSGALG00000001056	ENSGALG00000001056	ABHD11	ABHD11	chr19:657605-776272	ENSG00000106077	ABHD11	chr7:73736094-73738867	7.01988	5.9562	5.00554	9.00869	6.09945	4.80992	7.31465	7.46907	7.95603	8.27321	7.08888	9.04595		7.08729	1.40345
ENSGALG00000001058	ENSGALG00000001058	ARHGEF16	ARHGEF16	chr21:1013085-1019368	ENSG00000130762	ARHGEF16	chr1:3454426-3481113	26.3658	36.4309	35.7257	27.073	33.165	38.8726	28.1401	31.5368	44.8373	44.7321	49.635	28.0624		35.3814	7.80111
ENSGALG00000001062	ENSGALG00000001062	GGT7	GGT7	chr20:502767-516984	ENSG00000131067	GGT7	chr20:34844720-34872860	0.569436	0.601913	1.17526	0.472708	0.709856	1.07996	0.596149	0.476576	0.573419	0.453933	0.162369	0.214338		0.590493	0.296488
ENSGALG00000001067	ENSGALG00000001067	TMEM57	TMEM57	chr23:2364573-2380219	ENSG00000204178	TMEM57	chr1:25430858-25500209	34.0156	42.3482	39.8375	36.7849	46.0185	33.6801	36.3283	38.9282	51.1675	37.3729	25.6511	34.9456		38.0899	6.47901
ENSGALG00000001073	ENSGALG00000001073	NR6A1	NR6A1	chr17:9939862-9999037	ENSG00000148200	NR6A1	chr9:124517275-124771310	72.7394	47.5743	37.5732	49.7588	48.1573	62.1507	47.4062	36.8361	16.2844	17.1998	20.7038	38.2475		41.2193	17.3002
ENSGALG00000001076	ENSGALG00000001076	LIMK1	LIMK1	chr19:776889-785744	ENSG00000106683	LIMK1	chr7:74082933-74122525	13.2331	18.77	26.0745	11.5516	14.0494	23.1057	13.2125	20.1892	33.5699	23.1885	17.1076	12.1063		18.8465	6.71334
ENSGALG00000001078	ENSGALG00000001078	-	ENSGALG00000001078	chr21:1244895-1246231	ENSG00000169717	ACTRT2	chr1:3021483-3022903	0.0264399	0	0	0	0	0	0	0	0	0	0	0		0.00220332	0.00763254
ENSGALG00000001079	ENSGALG00000001079	WNT3	WNT3	chr27:1291170-1312214	ENSG00000108379	WNT3	chr17:46762506-46833154	0.107213	0.137612	0	0.121042	0	0.0886292	0	0.0363131	0	0.0403524	0.0494873	0.0415715		0.0518517	0.050271
ENSGALG00000001080	ENSGALG00000001080	NR5A1	NR5A1	chr17:9914202-9930043	ENSG00000136931	NR5A1	chr9:124481236-124507430	1.06146	0.479374	0.505768	0.887684	0.479684	0.341253	0.513099	0.349589	0.245905	0.355177	1.49731	1.39502		0.675944	0.428969
ENSGALG00000001081	ENSGALG00000001081	TTC34	TTC34	chr21:1352068-1361071	ENSG00000215912	TTC34	chr1:2635976-2801717	0	0	0	0	0.0284184	0	0	0.0224863	0	0	0	0		0.00424206	0.00998771
ENSGALG00000001084	ENSGALG00000001084	ATP8B3	ATP8B3	chr28:2286961-2297493	ENSG00000130270	ATP8B3	chr19:1782075-1812276	0.240736	0.135958	0.0750805	0.108715	0.136045	0.0716457	0.125679	0.137005	0.114124	0.0761225	0.0800184	0.268876		0.130834	0.0633948
ENSGALG00000001091	ENSGALG00000001091	C1orf116	C1orf116	chr26:2605226-2608015	ENSG00000182795	C1orf116	chr1:207018521-207032756	4.04235	2.297	0.689458	3.99328	2.62298	0.887666	3.42232	1.51915	1.33078	5.49236	10.4389	4.67849		3.45123	2.68989
ENSGALG00000001093	ENSGALG00000001093	TCF3	TCF3	chr28:2386329-2441061	ENSG00000071564	TCF3	chr19:1609290-1652605	68.5527	71.6052	80.532	59.8551	70.9066	86.8004	68.2491	74.7934	80.0322	85.7321	96.6084	61.4209		75.424	10.8893
ENSGALG00000001094	ENSGALG00000001094	ADGRD2	ADGRD2	chr17:9890241-9912922	ENSG00000180264	ADGRD2	chr9:124451425-124478589	0.905968	0.472806	0.279447	1.11274	0.255736	0.271601	0.909556	0.38447	0.15732	0.404751	1.30988	0.787626		0.604325	0.383416
ENSGALG00000001096	ENSGALG00000001096	-	UQCR11	chr28:2447967-2449864	ENSG00000267059	AC005943.1	chr19:1578339-1605445	292.523	310.646	343.633	297.826	331.106	290.339	337.999	363.557	576.955	499.712	452.249	344.027		370.048	91.1787
ENSGALG00000001097	ENSGALG00000001097	WNT9B	WNT9B	chr27:1266851-1277675	ENSG00000158955	WNT9B	chr17:46833201-46886730	0.0621442	0.0797646	0.0484536	0	0.0399081	0.231185	0	0.0315776	0.0409169	0	0	0		0.0444958	0.0650343
ENSGALG00000001099	ENSGALG00000001099	-	ANKHD1	chr13:1544221-1650955	ENSG00000254996	ANKHD1-EIF4EBP3	chr5:140401908-140549569	36.3627	32.231	33.16	36.2783	35.3972	32.4072	36.0281	38.5817	36.4575	35.9737	34.9652	36.3123		35.3462	1.87488
ENSGALG00000001101	ENSGALG00000001101	MBD3	MBD3	chr28:2453801-2470213	ENSG00000071655	MBD3	chr19:1573596-1592801	155.908	169.578	239.371	140.772	162.164	192.441	143.643	166.122	198.29	142.794	124.772	133.501		164.113	32.5331
ENSGALG00000001103	ENSGALG00000001103	cpsmb7	cpsmb7	chr17:9859672-9879881	ENSG00000136930	PSMB7	chr9:124353466-124415444	812.207	816.1	948.813	845.929	981.352	876.985	904.269	993.662	1242.43	1078.76	827.867	839.629		930.667	128.9
ENSGALG00000001106	ENSGALG00000001106	-	ENSGALG00000001106	chr28:2476805-2483279	ENSG00000181588	MEX3D	chr19:1554669-1568058	14.6289	14.3683	14.6792	10.7711	19.4424	9.78009	10.1124	14.7376	13.2334	11.7799	24.3125	15.2437		14.4241	4.10936
ENSGALG00000001107	ENSGALG00000001107	-	GOSR2	chr27:1231000-1242818	ENSG00000108433	GOSR2	chr17:46923075-46975524	25.1986	24.0581	25.2447	26.574	25.3424	26.6643	26.0686	25.0979	23.3365	24.2929	22.126	22.5597		24.7136	1.47712
ENSGALG00000001108	ENSGALG00000001108	MIER2	MIER2	chr28:2491634-2497664	ENSG00000105556	MIER2	chr19:301444-344815	14.551	14.6252	13.2663	12.1253	12.8053	16.8505	11.6925	14.6704	10.189	10.1726	14.8745	15.4959		13.4432	2.10041
ENSGALG00000001109	ENSGALG00000001109	GTSF1	GTSF1	chr27:1212096-1223346	ENSG00000170627	GTSF1	chr12:54455950-54473602	24.9292	22.7613	14.1605	30.4014	25.8934	16.041	27.1729	24.261	15.8686	22.5417	25.3903	35.7808		23.7668	6.21999
ENSGALG00000001110	ENSGALG00000001110	-	ENSGALG00000001110	chr19:813727-893422	ENSG00000277149	TYW1B	chr7:72558744-72828198	24.1427	26.6536	23.3048	22.2735	24.8446	25.8239	21.8442	20.5917	22.0984	21.5608	21.7851	21.385		23.0257	1.92468
ENSGALG00000001111	ENSGALG00000001111	DNAH9	DNAH9	chr18:1085142-1257267	ENSG00000007174	DNAH9	chr17:11598431-11969748	0.296578	0.142365	0.0864805	0.198721	0.232266	0.17641	0.151627	0.203386	0.076204	0.378498	1.09533	0.345048		0.281909	0.272833
ENSGALG00000001115	ENSGALG00000001115	MMEL1	MMEL1	chr21:1372223-1393392	ENSG00000142606	MMEL1	chr1:2590639-2632990	0.0565626	0.0363002	0	0	0.0181618	0	0.0167779	0.0574827	0.0186209	0.0159692	0.50919	0.0822582		0.0676103	0.141493
ENSGALG00000001117	ENSGALG00000001117	PFKFB2	PFKFB2	chr26:2614870-2634075	ENSG00000123836	PFKFB2	chr1:207034366-207081024	2.64051	1.92996	1.90368	2.99022	2.38667	2.60941	2.86325	2.60362	2.12649	1.85376	0.876275	3.10556		2.32412	0.625024
ENSGALG00000001118	ENSGALG00000001118	NEK6	NEK6	chr17:9813136-9859322	ENSG00000119408	NEK6	chr9:124257606-124353307	47.8393	37.1031	17.5064	49.594	30.3981	20.0449	48.9864	26.4222	18.7811	22.3523	20.2546	39.9175		31.6	12.5344
ENSGALG00000001121	ENSGALG00000001121	SH3GL1	SH3GL1	chr28:2505253-2530104	ENSG00000141985	SH3GL1	chr19:4360370-4400547	42.5379	47.1538	43.4778	38.134	47.3376	54.1106	40.1334	46.1168	36.6836	36.959	42.8792	38.7421		42.8555	5.18608
ENSGALG00000001122	ENSGALG00000001122	CALN1	CALN1	chr19:939566-1038785	ENSG00000183166	CALN1	chr7:71779491-72447151	0.891746	0.804308	0.78925	1.14281	1.36202	0.597732	0.714902	0.636826	1.0156	0.952623	1.10152	1.90672		0.993005	0.363722
ENSGALG00000001124	ENSGALG00000001124	LHX2	LHX2	chr17:9699001-9729062	ENSG00000106689	LHX2	chr9:124001670-124033301	0.269376	0.0844014	0.263166	0.461534	0.108417	0.244468	0.241777	0.446296	0.438328	0.255718	0.319433	0.297898		0.285901	0.120054
ENSGALG00000001126	ENSGALG00000001126	CHAF1A	CHAF1A	chr28:2531065-2545563	ENSG00000167670	CHAF1A	chr19:4402662-4445018	49.9815	55.3123	55.4659	55.6355	63.6226	45.5327	50.2928	50.635	58.1745	52.6413	55.1369	55.1577		53.9657	4.61166
ENSGALG00000001130	ENSGALG00000001130	GALNT17	WBSCR17	chr19:1074002-1259228	ENSG00000185274	GALNT17	chr7:71132169-71713600	0.358487	0.555993	0.512437	0.370998	0.0767383	0.351927	0.301286	0.318779	0.373721	0.337369	0.496491	0.382318		0.369712	0.122815
ENSGALG00000001132	ENSGALG00000001132	-	ENSGALG00000001132	chr13:1650999-1654407	ENSG00000113108	APBB3	chr5:140558268-140564781	0.0230273	0	0.0718172	0	0	0	0.0273219	0.0234019	0.0606464	0.05201	0.0318919	0.0267906		0.0264089	0.0247364
ENSGALG00000001136	ENSGALG00000001136	-	LOC419390	chr21:1399142-1400827				1.3719	1.12057	1.82816	1.57701	1.60184	1.63936	1.21342	1.19142	2.49635	1.80283	1.34729	1.65415		1.57036	0.37577
ENSGALG00000001141	ENSGALG00000001141	HES5	HES5	chr21:1416931-1418581	ENSG00000197921	HES5	chr1:2528745-2530245	3.4188	2.31941	0.460248	3.44269	0.758158	0.548992	3.18092	1.1748	0.58299	1.13882	1.56694	5.59108		2.01532	1.59888
ENSGALG00000001143	ENSGALG00000001143	ETS1	ETS1	chr24:878534-944202	ENSG00000134954	ETS1	chr11:128458761-128587558	61.6585	79.9667	59.7411	45.2533	71.9477	64.9066	50.6181	71.7531	56.4863	43.8383	17.332	39.3853		55.2406	17.213
ENSGALG00000001144	ENSGALG00000001144	ZNF346	ZNF346	chr13:10272904-10281839	ENSG00000113761	ZNF346	chr5:177022696-177081189	23.9497	26.8354	24.5338	21.1842	21.7531	22.7061	20.8304	22.2878	23.2878	28.8556	26.3969	24.4175		23.9199	2.44732
ENSGALG00000001146	ENSGALG00000001146	UBXN6	UBXN6	chr28:2546137-2550925	ENSG00000167671	UBXN6	chr19:4444999-4457822	17.2406	19.6962	15.176	16.1517	17.3682	13.7857	14.596	15.317	14.5674	16.9591	23.3223	20.8851		17.0888	2.88165
ENSGALG00000001149	ENSGALG00000001149	ADGRG5	ADGRG5	chr11:589249-592073	ENSG00000159618	ADGRG5	chr16:57542421-57591681	0.0883749	0.113433	0.757962	0.0997736	0.141883	0.49315	0.104857	0.157172	0.698252	0.648718	0.642578	0.0257045		0.330988	0.287858
ENSGALG00000001153	ENSGALG00000001153	AUTS2	AUTS2	chr19:1327381-1987436	ENSG00000158321	AUTS2	chr7:69598919-70793068	1.07636	0.877175	1.85165	0.713688	0.833854	1.66314	0.699363	1.2241	1.23741	1.32206	5.99991	1.72934		1.60234	1.43886
ENSGALG00000001156	ENSGALG00000001156	RNF222	RNF222	chr18:1716057-1716690	ENSG00000189051	RNF222	chr17:8390704-8397826	1.72338	0.603281	0.366468	2.12255	0.704282	0.0971396	2.04479	0.238829	0.20631	0.707722	0	0.0911378		0.742157	0.77807
ENSGALG00000001157	ENSGALG00000001157	DENND1A	DENND1A	chr17:9508468-9683772	ENSG00000119522	DENND1A	chr9:123379654-123930152	5.85147	5.37833	6.65951	4.89495	4.49853	6.48557	5.26445	4.96786	3.29428	4.03238	4.60854	3.67985		4.96798	1.03976
ENSGALG00000001158	ENSGALG00000001158	UIMC1	UIMC1	chr13:10285735-10332399	ENSG00000087206	UIMC1	chr5:176905005-177022633	11.5094	12.3923	9.75937	11.2181	11.5717	9.32258	10.228	10.3865	10.0717	10.7576	14.0559	12.8237		11.1747	1.38551
ENSGALG00000001160	ENSGALG00000001160	DOK4	DOK4	chr11:604053-605838	ENSG00000125170	DOK4	chr16:57471922-57487327	8.94792	15.4305	28.9573	7.77263	16.4139	19.9986	8.51834	12.9448	28.5009	28.6268	52.7776	11.7575		20.0539	12.9902
ENSGALG00000001161	ENSGALG00000001161	FLI1	FLI1	chr24:988811-1059723	ENSG00000151702	FLI1	chr11:128686535-128813267	0.251824	0.251398	0.145442	0.157948	0.0838534	0.0714077	0.509048	0.635061	0.270202	1.89592	4.44354	0.379791		0.757953	1.26168
ENSGALG00000001163	ENSGALG00000001163	NDEL1	NDEL1	chr18:1725864-1855756	ENSG00000166579	NDEL1	chr17:8413131-8490411	2.42182	3.90709	2.09583	2.99293	3.76361	2.45492	2.36891	2.54536	2.57994	2.47491	4.5172	3.14603		2.93905	0.750192
ENSGALG00000001165	ENSGALG00000001165	PANK4	PANK4	chr21:1419596-1450372	ENSG00000157881	PANK4	chr1:2508533-2526628	3.59294	3.9065	7.45249	3.59809	5.15536	6.37713	3.90615	4.64451	6.25311	5.28387	5.69203	3.619		4.95676	1.29382
ENSGALG00000001167	ENSGALG00000001167	KCNJ1	KCNJ1	chr24:1068728-1069844	ENSG00000151704	KCNJ1	chr11:128836315-128867373	0.0656132	0.0421086	0	0	0	0	0.038925	0	0.043201	0.0740978	0.0454359	0		0.0257818	0.0286645
ENSGALG00000001168	ENSGALG00000001168	POLR2C	POLR2C	chr11:606281-613985	ENSG00000102978	POLR2C	chr16:57462387-57472010	180.471	184.2	162.472	194.21	201.644	161.511	179.772	184.657	220.491	225.153	224.659	224.678		195.326	23.7585
ENSGALG00000001169	ENSGALG00000001169	CRB2	CRB2	chr17:9474862-9499855	ENSG00000148204	CRB2	chr9:123356170-123380324	6.33582	4.13128	3.57219	5.94176	2.877	4.95314	6.10685	5.1349	3.1502	3.41383	1.39555	1.2904		4.02524	1.71905
ENSGALG00000001171	ENSGALG00000001171	Sema6B	SEMA6B	chr28:2574359-2580634	ENSG00000167680	SEMA6B	chr19:4542593-4559808	2.72085	3.40002	6.0933	2.50345	3.00196	5.33595	3.68338	6.60217	7.03958	13.8745	10.176	4.69947		5.76089	3.39034
ENSGALG00000001172	ENSGALG00000001172	-	KBP	chr21:1419596-1450372				0.343659	0.181849	0.285755	0.249719	0.204026	0.291811	0.176062	0.185073	0.202911	0.214325	0.375013	0.193684		0.241991	0.0672574
ENSGALG00000001174	ENSGALG00000001174	RCC1L	RCC1L	chr19:2611677-2625091	ENSG00000274523	RCC1L	chr7:75027122-75074228	19.9808	19.603	15.4482	19.4561	21.3718	17.1792	19.6055	17.2384	16.5615	16.8688	14.7742	21.4604		18.2957	2.23618
ENSGALG00000001175	ENSGALG00000001175	-	C4BPA	chr26:2686742-2697121	ENSG00000117335	CD46	chr1:207752057-207795513	17.744	16.1353	23.0445	13.7139	14.7624	18.1063	14.2241	17.4944	17.7163	16.5493	20.1978	14.4199		17.009	2.70378
ENSGALG00000001177	ENSGALG00000001177	-	ENSGALG00000001177	chr26:2726481-2736958	ENSG00000174059	CD34	chr1:207880972-207911402	1.69064	0.987973	0.964529	0.791415	0.759112	0.306801	4.0282	3.82742	1.3213	9.36005	3.54077	4.55755		2.67798	2.58567
ENSGALG00000001181	ENSGALG00000001181	KCNJ5	KCNJ5	chr24:1075876-1112534	ENSG00000120457	KCNJ5	chr11:128891356-128921035	14.1348	19.4142	6.96244	14.6544	12.038	6.98867	21.8541	19.19	10.2006	16.9853	5.10976	7.11709		12.8874	5.68749
ENSGALG00000001182	ENSGALG00000001182	NCOA6	NCOA6	chr20:533384-565533	ENSG00000198646	NCOA6	chr20:34689097-34825649	11.8028	12.0697	11.458	10.4892	10.9932	14.5567	11.2659	12.2511	9.14167	8.98359	13.7422	10.7961		11.4625	1.62534
ENSGALG00000001183	ENSGALG00000001183	-	MYH10	chr18:1725864-1855756				57.2244	59.4174	71.3633	51.2654	69.1126	75.0644	56.3706	64.1482	60.4053	47.7477	42.706	40.0331		57.9049	11.0749
ENSGALG00000001184	ENSGALG00000001184	COQ9	COQ9	chr11:614087-620331	ENSG00000088682	COQ9	chr16:57447425-57461275	74.1475	77.1837	70.0805	80.0477	75.6409	64.2276	79.0284	90.5652	96.2286	92.4995	80.4146	88.292		80.6964	9.55194
ENSGALG00000001189	ENSGALG00000001189	NCF1	NCF1	chr19:2625769-2632588	ENSG00000158517	NCF1	chr7:74773962-74789315	1.02533	1.0002	1.05527	0.60194	0.737464	0.635726	0.827254	0.791925	0.99914	0.625274	0.454413	0.954316		0.809021	0.199864
ENSGALG00000001191	ENSGALG00000001191	MEOX1	MEOX1	chr27:3530596-3536176	ENSG00000005102	MEOX1	chr17:43640388-43661954	0.0173191	0.0444595	0	0.0391059	0.0444883	0.0214765	0	0.0176008	0.0456129	0.0195587	0.479726	0.0201495		0.0624581	0.132373
ENSGALG00000001201	ENSGALG00000001201	GFOD2	GFOD2	chr11:639658-645158	ENSG00000141098	GFOD2	chr16:67674531-67719421	18.2379	19.4505	26.1046	15.4749	18.5339	19.8616	17.5282	20.3403	27.5427	31.3458	49.3749	20.8936		23.7241	9.30504
ENSGALG00000001203	ENSGALG00000001203	TMEM45B	TMEM45B	chr24:1420684-1424248	ENSG00000151715	TMEM45B	chr11:129815819-129860003	1.09291	1.51501	1.49976	1.23387	0.617627	1.46367	0.570563	1.24397	1.66945	1.48108	1.81636	1.62755		1.31932	0.393094
ENSGALG00000001204	ENSGALG00000001204	ENKD1	ENKD1	chr11:648320-653717	ENSG00000124074	ENKD1	chr16:67662945-67667265	40.1392	46.2757	48.4438	39.3805	51.3606	41.0564	45.6645	49.7078	53.3711	46.8225	42.0679	53.7249		46.5012	5.03064
ENSGALG00000001206	ENSGALG00000001206	-	ENSGALG00000001206	chr13:8366751-8370140				0.895733	1.39965	1.27534	0.92333	0.800314	1.20734	1.84832	2.13723	1.9488	1.45137	3.93741	1.31398		1.5949	0.849177
ENSGALG00000001207	ENSGALG00000001207	PLCH2	PLCH2	chr21:1463926-1522836	ENSG00000149527	PLCH2	chr1:2425980-2505530	0.411062	0.276998	0.272428	0.440878	0.382768	0.331328	0.329214	0.396861	0.148858	0.116054	0.384281	0.274989		0.31381	0.101649
ENSGALG00000001209	ENSGALG00000001209	-	ENSGALG00000001209	chr20:575827-578793				18.5391	9.86648	1.41023	15.3148	7.54983	7.28928	17.1681	6.89292	4.16806	6.12772	10.0199	14.2039		9.87919	5.35856
ENSGALG00000001214	ENSGALG00000001214	PARD6A	PARD6A	chr11:655583-659450	ENSG00000102981	PARD6A	chr16:67660946-67662778	2.54109	3.46544	3.21958	2.65368	2.61096	2.48146	2.33662	2.55014	3.01158	2.79794	2.72747	2.80856		2.76704	0.324559
ENSGALG00000001219	ENSGALG00000001219	PIGU	PIGU	chr20:603731-624358	ENSG00000101464	PIGU	chr20:34560542-34698790	23.1188	23.093	22.096	20.6701	19.2047	25.3854	20.1525	24.4423	18.389	17.8547	16.6807	21.9515		21.0866	2.72004
ENSGALG00000001220	ENSGALG00000001220	HERPUD1	HERPUD1	chr11:661330-665530	ENSG00000051108	HERPUD1	chr16:56932048-56944863	42.1023	40.0833	34.8512	42.0106	36.1949	39.7514	35.1778	36.8987	31.6598	30.678	37.6228	46.1377		37.764	4.49422
ENSGALG00000001223	ENSGALG00000001223	PEX10	PEX10	chr21:1536288-1539949	ENSG00000157911	PEX10	chr1:2403964-2413797	39.0335	35.7727	40.6139	45.6596	38.59	37.1525	38.0856	38.4695	50.424	47.4374	43.4695	44.5641		41.606	4.60442
ENSGALG00000001225	ENSGALG00000001225	RABGAP1	RABGAP1	chr17:9298407-9363121	ENSG00000011454	RABGAP1	chr9:122940833-123104866	18.2808	17.1802	15.1658	14.4586	15.6964	16.8887	13.6875	16.4926	8.63057	9.12608	15.9425	15.0129		14.7136	2.99722
ENSGALG00000001229	ENSGALG00000001229	SKI	SKI	chr21:1663099-1753291	ENSG00000157933	SKI	chr1:2228695-2310119	3.62976	3.30152	4.20839	2.55838	1.82309	4.24116	3.29778	3.85573	1.71743	1.84309	2.04517	2.06096		2.88187	0.976951
ENSGALG00000001231	ENSGALG00000001231	SAMHD1	SAMHD1	chr20:632271-658022	ENSG00000101347	SAMHD1	chr20:36890229-36951843	30.1136	24.4914	26.8855	32.493	21.8014	24.7491	31.5977	26.3652	25.2966	23.2868	12.993	48.0107		27.3403	8.27237
ENSGALG00000001234	ENSGALG00000001234	CETP	CETP	chr11:668619-674247	ENSG00000087237	CETP	chr16:56961850-56983845	0.0499652	0.0641324	0	0.0940163	0	0.020653	0.0592836	0.016926	0.021932	0.075235	0.0691999	0.019377		0.0408934	0.0314994
ENSGALG00000001235	ENSGALG00000001235	-	ANKRD24	chr28:2618282-2624077				0.107252	0.151428	0.317771	0.0847597	0.0551004	0.265994	0.0890779	0.163495	0.29659	0.35125	0.430765	0.112302		0.202149	0.124387
ENSGALG00000001238	ENSGALG00000001238	STX8	STX8	chr18:2134793-2210857	ENSG00000170310	STX8	chr17:9250471-9576591	54.0393	63.1062	66.5822	52.4799	61.587	53.1203	55.9523	66.2693	72.851	66.8678	79.761	62.708		62.9437	8.29432
ENSGALG00000001239	ENSGALG00000001239	SLC26A2	SLC26A2	chr13:8343627-8347969	ENSG00000155850	SLC26A2	chr5:149960737-149993455	2.62637	3.3338	4.07291	2.42452	2.81413	4.53435	2.18649	3.40641	3.68779	2.16304	2.23068	1.60376		2.92369	0.883901
ENSGALG00000001242	ENSGALG00000001242	-	ENSGALG00000001242	chr23:4108591-4112001				4.0736	4.97088	5.70369	5.03625	5.96891	4.82022	4.45891	3.57136	7.36642	4.66516	3.33739	5.25666		4.93579	1.0935
ENSGALG00000001244	ENSGALG00000001244	-	ENSGALG00000001244	chr18:2213177-2218737				0.123319	0.0783555	0.111376	0.137997	1.54e-06	1.85e-06	0.127113	0.18146	0.0705385	0.141151	0.516781	0.142286		0.135865	0.132314
ENSGALG00000001245	ENSGALG00000001245	SIRT6	SIRT6	chr28:2625854-2632332	ENSG00000077463	SIRT6	chr19:4174109-4182604	61.8258	65.7117	57.2232	57.6572	65.1898	47.5077	54.0372	63.4965	69.5847	63.1695	92.4717	76.0887		64.497	11.4908
ENSGALG00000001250	ENSGALG00000001250	-	APLP2	chr24:1440223-1481454				262.08	200.199	124.307	250.475	189.839	136.921	244.476	181.854	114.896	258.952	411.922	283.64		221.63	82.8641
ENSGALG00000001252	ENSGALG00000001252	CREB3L3	CREB3L3	chr28:2632684-2637600	ENSG00000060566	CREB3L3	chr19:4153601-4173054	0.205048	0.175458	0.170533	0.293227	0.158014	0.27122	0.454139	0.486228	0.198011	2.19213	0.814085	0.508925		0.493918	0.569529
ENSGALG00000001253	ENSGALG00000001253	RC3H2	RC3H2	chr17:9268843-9284385	ENSG00000056586	RC3H2	chr9:122844556-122905341	6.00394	3.59031	1.83445	4.82059	3.48071	4.09537	4.86973	3.82568	1.11307	1.42692	3.30678	4.15662		3.54368	1.46392
ENSGALG00000001256	ENSGALG00000001256	NLRC5	NLRC5	chr11:676353-711376	ENSG00000140853	NLRC5	chr16:56989485-57083531	0.263242	0.146415	0.109466	0.19813	0.118335	0.136013	0.166579	0.0668811	0.0924391	0.0644112	0.0789923	0.12761		0.130709	0.0579142
ENSGALG00000001258	ENSGALG00000001258	NUMA1	NUMA1	chr1:194229469-194241962	ENSG00000137497	NUMA1	chr11:72002864-72080693	34.4965	36.7576	37.5515	29.7827	34.0723	34.5586	33.6856	31.3441	44.3929	43.6954	54.6618	37.8604		37.7383	6.88772
ENSGALG00000001261	ENSGALG00000001261	CFAP52	CFAP52	chr18:2219938-2238454	ENSG00000166596	CFAP52	chr17:9576627-9643459	0.108491	0.0464175	0.0281967	0.0408281	0.139342	0.0672668	0.150178	0.0367519	0.0238108	0.04084	0.175298	0.0631107		0.076711	0.0527122
ENSGALG00000001262	ENSGALG00000001262	CLIC4	CLIC4	chr23:2508970-2526376	ENSG00000169504	CLIC4	chr1:24745357-24844324	75.0455	76.7084	77.6343	71.1278	74.5644	82.8765	79.0222	94.6386	77.7969	99.6039	110.471	92.3104		84.3167	12.1294
ENSGALG00000001263	ENSGALG00000001263	GTF2IRD1	GTF2IRD1	chr19:2692299-2727020	ENSG00000006704	GTF2IRD1	chr7:74453790-74602604	17.4822	31.9835	38.9519	14.9855	29.4703	37.2727	21.3788	31.3793	41.9124	25.1926	25.0388	10.4874		27.1279	9.84881
ENSGALG00000001264	ENSGALG00000001264	PLXNA2	PLXNA2	chr26:2758146-2844703	ENSG00000076356	PLXNA2	chr1:208022242-208244320	0.36343	0.306343	1.33647	0.251083	0.236873	0.928245	0.30249	0.501644	1.09287	0.673834	1.61519	0.586907		0.682948	0.461294
ENSGALG00000001267	ENSGALG00000001267	-	MAP2K2	chr28:2637818-2646108	ENSG00000230626	AC011005.1	chr7:129126518-129130793	200.895	207.149	199.787	197.894	194.231	194.054	201.442	209.295	232.955	205.674	167.189	207.191		201.48	14.8744
ENSGALG00000001270	ENSGALG00000001270	PRKCZ	PRKCZ	chr21:1792969-1832353	ENSG00000067606	PRKCZ	chr1:2050470-2185395	12.9963	12.7307	11.9813	12.921	11.4731	11.844	12.2393	11.6295	11.3267	9.49084	9.19039	9.96259		11.4821	1.29501
ENSGALG00000001273	ENSGALG00000001273	C2CD4C	C2CD4C	chr28:2655667-2656909	ENSG00000183186	C2CD4C	chr19:405438-409170	2.04697	0.740103	0.359665	1.7902	0.703552	0.500516	1.29988	0.556691	0.303721	1.04188	2.99469	3.82382		1.34681	1.12079
ENSGALG00000001275	ENSGALG00000001275	PDCL	PDCL	chr17:9259526-9263603	ENSG00000136940	PDCL	chr9:122798389-122828631	24.2093	23.3927	21.5501	20.6731	20.938	22.1551	20.4493	21.5114	18.2737	16.6762	18.1061	20.9532		20.7407	2.17496
ENSGALG00000001276	ENSGALG00000001276	HOXB9	HOXB9	chr27:3648587-4003342	ENSG00000170689	HOXB9	chr17:48621159-48626356	0.110678	0.14206	0.0862954	0	0.142152	0	0.0656598	0.112479	0.0728726	0.437465	0.61314	0.257532		0.170028	0.183175
ENSGALG00000001279	ENSGALG00000001279	ZNF652	ZNF652	chr27:3606500-3613929	ENSG00000198740	ZNF652	chr17:49289206-49362473	21.4685	20.0537	20.7829	19.4336	23.222	24.0733	19.5092	20.447	18.5651	18.2606	18.0356	19.0177		20.2391	1.90046
ENSGALG00000001282	ENSGALG00000001282	GABRD	GABRD	chr21:1843700-1851220	ENSG00000187730	GABRD	chr1:2019298-2030758	1.01065	1.03112	0.646565	0.234053	0.29955	0.674828	0.368965	0.368699	0.102374	0.321916	0.03589	0.150746		0.437113	0.333024
ENSGALG00000001283	ENSGALG00000001283	SRRM1	SRRM1	chr23:2533127-2549839	ENSG00000133226	SRRM1	chr1:24631716-24673267	148.728	147.942	144.614	155.78	156.792	149.532	153.889	153.499	138.77	131.975	110.4	132.231		143.679	13.4755
ENSGALG00000001288	ENSGALG00000001288	CFAP74	CFAP74	chr21:1856462-1897536	ENSG00000142609	CFAP74	chr1:1921951-2003837	0.406685	0.399174	0.289112	0.418628	0.399432	0.215072	0.361898	0.401145	0.236267	0.357964	0.629507	0.528813		0.386975	0.114474
ENSGALG00000001289	ENSGALG00000001289	SHC2	SHC2	chr28:2657405-2666166	ENSG00000129946	SHC2	chr19:416583-460996	0.575913	0.46276	0.91093	0.597674	0.339968	0.594218	0.438603	0.324657	1.15386	0.711233	0.986858	1.27961		0.698024	0.316367
ENSGALG00000001299	ENSGALG00000001299	-	GIP	chr27:3648587-4003342				0.764253	2.69761	5.66092	0.934731	2.78116	3.55391	1.13348	3.23619	4.36106	3.02078	1.58769	1.03735		2.56409	1.52999
ENSGALG00000001304	ENSGALG00000001304	-	ENSGALG00000001304	chr21:1900178-1905748	ENSG00000178821	TMEM52	chr1:1917590-1919273	0.920603	0.887737	0.734951	0.614753	0.582799	0.675224	0.664012	0.58933	0.617449	0.768658	1.36243	0.686298		0.758687	0.219398
ENSGALG00000001306	ENSGALG00000001306	NFRKB	NFRKB	chr24:1538407-1555630	ENSG00000170322	NFRKB	chr11:129863636-129895590	22.9527	21.9072	23.2914	20.4055	20.3284	24.3513	21.5302	23.9029	19.3803	17.9686	17.3782	19.4302		21.0689	2.2956
ENSGALG00000001309	ENSGALG00000001309	SNF8	SNF8	chr27:3648587-4003342	ENSG00000159210	SNF8	chr17:48929316-48945117	78.0545	95.664	108.31	91.6735	143.562	94.3466	87.3366	91.1739	148.075	112.778	94.4517	88.5662		102.833	22.0462
ENSGALG00000001310	ENSGALG00000001310	-	TRNAU1AP	chr23:2561957-2574203	ENSG00000180098	TRNAU1AP	chr1:28553085-28578545	2.45513	1.60652	0.300275	2.60875	0.989268	1.373	3.76977	1.90799	2.15533	3.31625	1.80014	3.47244		2.14624	1.03945
ENSGALG00000001311	ENSGALG00000001311	-	ENSGALG00000001311	chr18:2251577-2261226	ENSG00000006740	ARHGAP44	chr17:12789539-12991643	0.285585	0.442399	0.337843	0.300184	0.328852	0.647217	0.292108	0.450357	0.42794	0.489332	2.56408	0.675972		0.603489	0.631041
ENSGALG00000001313	ENSGALG00000001313	EIF4H	EIF4H	chr19:2848375-2858861	ENSG00000106682	EIF4H	chr7:74174245-74197101	377.373	374.26	358.115	397.876	432.908	386.322	403.601	353.748	365.096	357.33	277.345	339.537		368.626	38.4739
ENSGALG00000001314	ENSGALG00000001314	PTGS1	PTGS1	chr17:9247983-9255289	ENSG00000095303	PTGS1	chr9:122370530-122395703	2.28552	3.369	3.59186	1.73364	2.27038	3.29911	2.57408	3.81067	3.9972	3.16583	1.31065	2.34743		2.81295	0.849749
ENSGALG00000001315	ENSGALG00000001315	UBE2Z	UBE2Z	chr27:3648587-4003342	ENSG00000159202	UBE2Z	chr17:48908369-48929056	13.7011	12.2581	10.8872	10.5125	12.1889	13.4167	11.974	11.9294	8.1851	10.3399	11.869	14.9286		11.8492	1.76043
ENSGALG00000001316	ENSGALG00000001316	CPNE2	CPNE2	chr11:713259-752424	ENSG00000140848	CPNE2	chr16:57092537-57148367	6.60918	6.88543	9.52063	4.93539	6.39503	9.77602	6.59343	7.66547	11.1034	9.8402	9.03032	5.15494		7.79245	2.00811
ENSGALG00000001317	ENSGALG00000001317	-	LOC428335	chr28:2670557-2679462				84.149	74.0994	75.2993	95.2968	75.8559	72.3455	80.8765	71.6626	90.3859	88.5924	85.3679	121.853		84.6487	14.0033
ENSGALG00000001319	ENSGALG00000001319	CAMK1G	CAMK1G	chr26:3106194-3112647	ENSG00000008118	CAMK1G	chr1:209583717-209613938	9.41282	9.7444	9.59888	7.21008	6.78596	9.31877	9.55544	14.0231	11.4495	12.6575	7.49504	11.0705		9.86017	2.17175
ENSGALG00000001320	ENSGALG00000001320	-	CYP1A2	chr10:2370951-2373767	ENSG00000140505	CYP1A2	chr15:74748844-74756202	0.0367399	0.0471572	0.057292	0.0829574	0.0235938	0.0683387	0	0.0560064	0.0725707	0.912798	1.57738	0.128233		0.255256	0.484606
ENSGALG00000001325	ENSGALG00000001325	-	CYP1A1	chr10:2375741-2379385	ENSG00000140465	CYP1A1	chr15:74719542-74725610	0.0805593	0.0827128	0.175892	0.09095	0.0827662	0.0399323	0.0956181	0.0982501	0.0636328	0.181987	0.602704	0.112511		0.142293	0.150724
ENSGALG00000001328	ENSGALG00000001328	BSG	BSG	chr28:2698083-2709095	ENSG00000172270	BSG	chr19:571277-583493	479.477	515.257	609.733	502.856	626.363	537.354	483.485	486.816	719.497	669.346	498.18	408.475		544.737	91.3205
ENSGALG00000001329	ENSGALG00000001329	EPB41	EPB41	chr23:2610405-2669406	ENSG00000159023	EPB41	chr1:28887091-29120046	4.95255	5.12765	3.57489	4.04062	4.33585	7.24492	4.12022	3.82399	2.42016	2.4797	1.90233	3.06103		3.92366	1.44814
ENSGALG00000001330	ENSGALG00000001330	ATP5G1	ATP5G1	chr27:3648587-4003342	ENSG00000159199	ATP5G1	chr17:48892765-48895871	366.524	355.15	367.211	355.392	387.558	317.271	429.435	376.435	515.36	568.015	525.289	462.52		418.847	80.6217
ENSGALG00000001331	ENSGALG00000001331	ST14	ST14	chr24:1562613-1582952	ENSG00000149418	ST14	chr11:130159562-130210376	73.8352	86.5734	92.6782	61.4406	76.6541	97.8957	69.9224	90.4727	98.3437	73.95	57.0566	40.0232		76.5705	17.8009
ENSGALG00000001332	ENSGALG00000001332	RBL1	RBL1	chr20:663123-682263	ENSG00000080839	RBL1	chr20:36996349-37095995	30.7623	23.7918	21.594	27.6705	21.8101	34.0511	26.2237	23.2847	12.4644	12.5741	11.6812	24.2008		22.5091	7.16716
ENSGALG00000001333	ENSGALG00000001333	MRRF	MRRF	chr17:9220719-9242855	ENSG00000148187	MRRF	chr9:122264603-122331343	55.4874	55.7467	56.6112	61.8438	59.4364	59.4859	57.8424	58.311	76.6321	67.0912	48.08	56.764		59.4443	6.98825
ENSGALG00000001334	ENSGALG00000001334	GNB1	GNB1	chr21:1923158-1956964	ENSG00000078369	GNB1	chr1:1785285-1891117	203.615	191.447	192.469	191.125	183.745	196.496	203.777	188.717	159.241	180.239	186.165	179.138		188.014	12.0392
ENSGALG00000001335	ENSGALG00000001335	-	FAM18B1	chr18:2287670-2294491	ENSG00000171928	TVP23B	chr17:18780995-18806714	131.252	137.472	128.259	128.661	144.694	123.32	125.477	124.36	132.614	129.547	132.377	136.442		131.206	6.11817
ENSGALG00000001341	ENSGALG00000001341	ZBTB44	ZBTB44	chr24:1595969-1635701	ENSG00000196323	ZBTB44	chr11:130226677-130314686	12.302	8.21378	8.63681	9.49129	8.26234	14.9951	9.89944	9.72763	4.50672	4.339	4.71411	7.42281		8.54259	3.16197
ENSGALG00000001342	ENSGALG00000001342	HCN2	HCN2	chr28:2711393-2723081	ENSG00000099822	HCN2	chr19:589893-617159	0.252391	0.957137	2.54036	0.323801	0.663061	1.70714	0.408357	0.862761	2.25097	1.41218	1.93842	0.747444		1.172	0.78029
ENSGALG00000001343	ENSGALG00000001343	LAMB3	LAMB3	chr26:3114634-3124587	ENSG00000196878	LAMB3	chr1:209614870-209652466	13.4856	7.65607	3.16177	10.1012	7.41877	8.28832	9.97247	6.2056	2.56131	3.408	2.67749	6.78876		6.81045	3.42513
ENSGALG00000001347	ENSGALG00000001347	LHX6	LHX6	chr17:9209477-9219104	ENSG00000106852	LHX6	chr9:122202577-122229626	0.492105	0.120773	0.609134	0.661526	0.241762	0.388937	0.632466	0.42081	1.02046	0.492745	0.260634	0.437524		0.481573	0.236022
ENSGALG00000001348	ENSGALG00000001348	TEKT3	TEKT3	chr18:2340326-2346218	ENSG00000125409	TEKT3	chr17:15303811-15341641	0.0235891	0.0302776	0	0	0.0605943	0.0292515	0	0.0479457	0.062126	0.0266394	0	0.0274442		0.0256556	0.0228099
ENSGALG00000001350	ENSGALG00000001350	RSPRY1	RSPRY1	chr11:783315-794496	ENSG00000159579	RSPRY1	chr16:57186137-57240475	21.2399	26.91	28.0511	20.8807	23.4293	28.0403	22.0197	29.8463	26.218	23.1281	29.1533	21.5915		25.0423	3.32999
ENSGALG00000001362	ENSGALG00000001362	CLK3	CLK3	chr10:2406128-2414549	ENSG00000179335	CLK3	chr15:74598500-74645414	25.5379	26.9612	27.3259	26.9053	25.7194	26.2106	24.1735	26.5508	36.0867	31.6166	43.0445	28.6572		29.0658	5.44018
ENSGALG00000001363	ENSGALG00000001363	MYBBP1A	MYBBP1A	chr19:2859430-2878400	ENSG00000132382	MYBBP1A	chr17:4538897-4555631	102.53	98.3751	80.8613	101.379	102.823	106.407	101.192	94.8207	76.0193	73.0433	57.3479	83.0625		89.8218	15.4307
ENSGALG00000001364	ENSGALG00000001364	CSNK1A1	CSNK1A1	chr13:8450252-8481381	ENSG00000113712	CSNK1A1	chr5:149492197-149551552	227.39	246.125	219.219	247.036	203.065	208.006	235.376	225.017	204.318	194.513	200.959	215.177		218.85	17.6491
ENSGALG00000001366	ENSGALG00000001366	CASP9	CASP9	chr21:4917507-4923271	ENSG00000132906	CASP9	chr1:15490832-15526534	7.36976	9.02778	7.34112	4.52398	5.97442	5.69874	5.08694	5.09751	6.45755	5.85441	5.82139	7.43314		6.30723	1.27722
ENSGALG00000001369	ENSGALG00000001369	-	ENSGALG00000001369	chr26:3151010-3153878	ENSG00000117594	HSD11B1	chr1:209686178-209734950	1.24044	0.863541	0.524565	1.02065	0.78309	0.573566	1.02276	0.833289	0.775199	2.37431	3.23209	1.85899		1.25854	0.82116
ENSGALG00000001370	ENSGALG00000001370	ADAMTS8	ADAMTS8	chr24:1657702-1668923	ENSG00000134917	ADAMTS8	chr11:130404925-130428993	0.537941	0.671459	1.42713	0.180862	0.410437	0.985181	0.66311	0.605217	0.746526	0.5582	0.644253	0.422515		0.654403	0.313085
ENSGALG00000001371	ENSGALG00000001371	-	ENSGALG00000001371	chr18:2837332-2861145	ENSG00000153976	HS3ST3A1	chr17:13495689-13601927	0.128893	0.606611	0	0.24253	0.551821	0.106555	0.101954	0.218316	0.056577	0.339641	0.29752	0.24993		0.241696	0.187293
ENSGALG00000001373	ENSGALG00000001373	TRAF3IP3	TRAF3IP3	chr26:3155550-3164147	ENSG00000009790	TRAF3IP3	chr1:209756032-209782320	0.246115	0.114872	0	0.15156	0.201156	0.138724	0.212375	0.11369	0.117852	0.126337	0.371847	0.156184		0.162559	0.0903944
ENSGALG00000001374	ENSGALG00000001374	SLC35E2B	SLC35E2B	chr21:2000640-2022446	ENSG00000189339	SLC35E2B	chr1:1659529-1692728	16.8466	20.8637	20.6638	17.0434	15.2316	19.9654	16.0128	19.8397	16.0402	15.0779	15.1032	15.5425		17.3526	2.29985
ENSGALG00000001375	ENSGALG00000001375	COX10	COX10	chr18:2633966-2730807	ENSG00000006695	COX10	chr17:14069496-14208677	29.3352	29.273	26.919	27.2097	25.7956	29.5709	32.3116	30.9257	30.5569	31.8664	25.8696	26.701		28.8612	2.30583
ENSGALG00000001376	ENSGALG00000001376	ARID3B	ARID3B	chr10:2418108-2443420	ENSG00000179361	ARID3B	chr15:74541177-74598131	52.9742	52.0404	34.9962	44.4415	40.4124	35.005	47.993	47.7037	22.6345	35.6625	63.7713	57.9334		44.6307	11.5056
ENSGALG00000001377	ENSGALG00000001377	POLRMT	POLRMT	chr28:2724944-2739524	ENSG00000099821	POLRMT	chr19:617224-633604	38.7002	41.0171	32.558	37.2935	37.9254	40.8124	36.6891	38.9118	30.6883	29.3067	28.8341	42.989		36.3105	4.80394
ENSGALG00000001378	ENSGALG00000001378	C1orf74	C1orf74	chr26:3165103-3165577	ENSG00000162757	C1orf74	chr1:209779208-209784559	11.2555	6.65689	10.1525	12.7072	11.9051	9.98906	9.03401	5.83144	16.1294	10.3432	8.864	8.34483		10.1011	2.75746
ENSGALG00000001381	ENSGALG00000001381	-	ACTG1	chr10:2445977-2448023	ENSG00000184009	ACTG1	chr17:81509971-81523847	474.569	516.661	865.971	478.478	526.979	608.437	460.1	572.164	934.752	605.896	585.649	520.503		595.847	151.462
ENSGALG00000001382	ENSGALG00000001382	CDC2L1	CDK11A	chr21:2000640-2022446	ENSG00000008128	CDK11A	chr1:1702730-1724324	51.2137	60.8933	55.5417	52.9548	72.039	39.5672	49.0448	42.9724	54.5391	52.5135	61.7566	54.6023		53.9699	8.53677
ENSGALG00000001383	ENSGALG00000001383	HTR4	HTR4	chr13:8257576-8273261	ENSG00000164270	HTR4	chr5:148451032-148677235	8.56257	6.84385	4.20626	4.95743	7.73452	8.90666	6.99628	7.52249	3.38679	4.03794	1.04254	1.934		5.51094	2.61583
ENSGALG00000001387	ENSGALG00000001387	SPNS2	SPNS2	chr19:2919588-3039102	ENSG00000183018	SPNS2	chr17:4498838-4539035	1.65629	0.0880549	0	1.32738	0.0293667	0.113429	1.29167	0.0929603	0.0860135	0.147529	0.0633395	1.31732		0.517779	0.657484
ENSGALG00000001389	ENSGALG00000001389	TTLL11	TTLL11	chr17:9111586-9145145	ENSG00000175764	TTLL11	chr9:121821928-122093606	8.97727	8.06788	10.0175	8.12161	9.06925	12.1856	7.34275	7.68814	7.12408	5.68363	5.65794	7.83361		8.14744	1.79953
ENSGALG00000001391	ENSGALG00000001391	PLLP	PLLP	chr11:822732-825202	ENSG00000102934	PLLP	chr16:57248547-57284687	0.0791235	0.0507791	0.123385	0.178658	0.101624	0	0.18776	0.120616	0.468867	0.17871	0.219166	0.138082		0.153898	0.117075
ENSGALG00000001392	ENSGALG00000001392	MMP23B	MMP23B	chr21:2025701-2032615	ENSG00000189409	MMP23B	chr1:1632095-1635263	0.629038	0.461369	0.420394	0.473449	0.230834	0.557168	0.604191	0.943686	0.788896	0.811863	0.954165	0.80154		0.639716	0.22407
ENSGALG00000001394	ENSGALG00000001394	UBL7	UBL7	chr10:2448879-2454055	ENSG00000138629	UBL7	chr15:74445977-74461182	36.1417	34.0996	35.5252	34.387	27.0509	34.6874	32.8474	34.7033	43.464	42.1833	51.5488	44.3005		37.5783	6.56856
ENSGALG00000001405	ENSGALG00000001405	IRF6	IRF6	chr26:3166484-3173112	ENSG00000117595	IRF6	chr1:209785623-209806175	120.116	96.0555	69.0993	130.225	81.4422	76.1139	127.672	82.5075	74.5478	88.5926	124.636	162.378		102.782	29.3231
ENSGALG00000001407	ENSGALG00000001407	ADAMTS15	ADAMTS15	chr24:1676277-1685806	ENSG00000166106	ADAMTS15	chr11:130448974-130476641	0.230328	0.25129	0.448965	0.0910126	0.281035	0.385583	0.16397	0.304297	0.333635	0.364157	0.446593	0.321564		0.301869	0.107221
ENSGALG00000001409	ENSGALG00000001409	IL12B	IL12B	chr13:8148377-8157639	ENSG00000113302	IL12B	chr5:159314783-159330887	0.162089	0.208106	0.0634055	0.139697	0.0681133	0.109632	0.192124	0.0898478	0.0232772	0.0598902	0.0734442	0.188719		0.114862	0.0614797
ENSGALG00000001410	ENSGALG00000001410	SPNS3	SPNS3	chr19:3081800-3101570	ENSG00000182557	SPNS3	chr17:4433688-4488208	0.490119	0.148021	0.224791	0.325491	0.185145	0.286009	0.136829	0.292995	0.113895	0.325586	0.239575	0.402507		0.264247	0.112702
ENSGALG00000001412	ENSGALG00000001412	SEMA7A	SEMA7A	chr10:2464701-2487049	ENSG00000138623	SEMA7A	chr15:74409289-74434467	2.76864	2.3125	2.49203	3.44752	2.87615	2.05742	2.19805	1.69648	1.79612	3.01171	16.7335	4.07377		3.78866	4.13388
ENSGALG00000001416	ENSGALG00000001416	ADRA1B	ADRA1B	chr13:7992486-8008603	ENSG00000170214	ADRA1B	chr5:159865080-159972544	0.362861	0.0582184	0	0.614495	0.058256	0.0281228	0.349809	0.161334	0.0298643	0.17928	0.157046	0.7124		0.225974	0.236966
ENSGALG00000001418	ENSGALG00000001418	GUCA1B	GUCA1B	chr26:3177502-3181038	ENSG00000112599	GUCA1B	chr6:42184401-42194916	0	0	0	0.0961846	0.0547115	0.105647	0.0505424	0.0865818	0	0.0481064	0.0589965	0.0991193		0.0499908	0.0416561
ENSGALG00000001419	ENSGALG00000001419	DAB2IP	DAB2IP	chr17:8976003-9095837	ENSG00000136848	DAB2IP	chr9:121567057-121785530	4.43235	3.07303	3.06442	3.92466	2.14908	3.32207	3.38982	3.42808	2.09793	2.14091	7.20703	3.65526		3.49039	1.37753
ENSGALG00000001420	ENSGALG00000001420	RALGAPB	RALGAPB	chr20:769627-832009	ENSG00000170471	RALGAPB	chr20:38472816-38578861	8.23961	7.87252	7.52442	6.27138	5.64257	8.36268	7.41249	8.03675	6.19129	8.59988	17.0559	7.28833		8.20815	2.93801
ENSGALG00000001425	ENSGALG00000001425	SNX19	SNX19	chr24:1769656-1795190	ENSG00000120451	SNX19	chr11:130875436-130916509	5.83196	8.41528	6.68738	5.40652	6.57128	7.77246	4.21879	6.01176	5.88886	4.13498	3.87855	4.72732		5.79543	1.42816
ENSGALG00000001428	ENSGALG00000001428	EFHD1	EFHD1	chr9:950200-964519	ENSG00000115468	EFHD1	chr2:232606057-232682781	14.39	16.77	11.5485	10.0603	10.3624	10.0794	14.0019	12.5131	8.84037	12.8851	19.8462	12.5388		12.8197	3.12803
ENSGALG00000001429	ENSGALG00000001429	TTC1	TTC1	chr13:7946298-7979505	ENSG00000113312	TTC1	chr5:160009113-160065543	92.6723	104.753	113.382	108.376	133.76	110.991	112.039	113.833	137.508	120.91	108.471	99.2253		112.993	12.8376
ENSGALG00000001431	ENSGALG00000001431	GUCA1A	GUCA1A	chr26:3184462-3188865	ENSG00000048545	GUCA1A	chr6:42155406-42180056	0.57486	0.113516	0.0344782	0.299542	0.170385	0.10967	0.262335	0.134818	0.0582306	0.0998764	0	0.437298		0.191251	0.172677
ENSGALG00000001433	ENSGALG00000001433	B3GNTL1	B3GNTL1	chr18:3160547-3269810	ENSG00000175711	B3GNTL1	chr17:82942155-83051810	2.74156	2.81512	3.90109	3.17255	3.65322	3.78212	3.37484	3.55235	3.65531	3.90879	2.65787	3.22948		3.37036	0.4478
ENSGALG00000001434	ENSGALG00000001434	STOM	STOM	chr17:8909344-8919459	ENSG00000148175	STOM	chr9:121338988-121370304	3.22681	1.85152	1.4107	3.99252	2.19308	1.60428	3.38415	2.10055	1.8652	7.31939	8.58426	3.73015		3.43855	2.29211
ENSGALG00000001437	ENSGALG00000001437	NTM	NTM	chr24:1863779-2108022	ENSG00000182667	NTM	chr11:131370478-132336822	3.06271	3.06143	4.66569	4.12393	3.40293	2.85314	4.37185	4.61147	6.16587	16.995	43.8938	4.357		8.46373	11.7956
ENSGALG00000001439	ENSGALG00000001439	RANBP10	RANBP10	chr11:853430-907120	ENSG00000141084	RANBP10	chr16:67723066-67806652	45.145	47.7866	41.2841	43.7819	40.6851	42.0721	43.2762	45.6356	40.1831	37.3984	42.5174	49.4965		43.2718	3.37335
ENSGALG00000001440	ENSGALG00000001440	ACTL9	ACTL9	chr28:1858899-1860380	ENSG00000181786	ACTL9	chr19:8697397-8698822	0	0	0	0	0	0	0	0	0	0	0	0		0	0
ENSGALG00000001441	ENSGALG00000001441	UBE2G1	UBE2G1	chr19:3117216-3141494	ENSG00000132388	UBE2G1	chr17:4269259-4366628	314.063	357.427	292.267	321.055	333.861	315.261	315.729	299.905	248.112	240.386	242.736	314.126		299.577	37.3538
ENSGALG00000001442	ENSGALG00000001442	OPCML	OPCML	chr24:2114866-2367108	ENSG00000183715	OPCML	chr11:132414977-133532519	2.2768	2.34431	3.66514	2.41497	2.8419	3.88293	2.27345	4.30638	3.20251	6.2486	13.7057	2.44477		4.13395	3.2314
ENSGALG00000001445	ENSGALG00000001445	FABP6	FABP6	chr13:7872425-7910143	ENSG00000170231	FABP6	chr5:160187367-160238735	13.9086	11.0615	17.613	16.0326	14.8254	12.1202	15.2258	16.4309	23.2762	21.5192	17.2676	19.9051		16.5988	3.62493
ENSGALG00000001446	ENSGALG00000001446	GSN	GSN	chr17:8882614-8908331	ENSG00000148180	GSN	chr9:121207794-121332843	45.7025	50.0932	53.9375	50.769	62.7758	61.7736	48.7125	49.3179	77.3585	51.3707	15.8521	21.1646		49.069	16.7225
ENSGALG00000001449	ENSGALG00000001449	STRA6	STRA6	chr10:2519525-2529895	ENSG00000137868	STRA6	chr15:74179466-74212267	5.86664	1.33768	1.99037	6.30605	0.73695	1.03097	7.03023	2.79658	1.63452	7.69641	5.70863	14.9178		4.7544	4.09622
ENSGALG00000001450	ENSGALG00000001450	-	ENSGALG00000001450	chr24:2430482-2445194	ENSG00000080854	IGSF9B	chr11:133908564-133956985	0.752938	0.393729	0.413119	0.503735	0.143267	0.674322	0.545942	0.382593	0.257055	0.141717	0.772437	0.973322		0.496181	0.259693
ENSGALG00000001452	ENSGALG00000001452	ATP5F1	ATP5F1	chr26:3215747-3219185	ENSG00000116459	ATP5F1	chr1:111448864-111462773	521.167	556.52	614.186	595.603	655.961	561.901	598.195	622.009	792.718	683.556	599.685	596.039		616.462	70.2478
ENSGALG00000001459	ENSGALG00000001459	TNNC1	TNNC1	chr12:588235-593708	ENSG00000114854	TNNC1	chr3:52451102-52454070	11.961	12.5392	17.8707	10.9586	15.9254	13.6674	13.9689	12.983	21.8531	22.1357	15.0044	14.5715		15.2866	3.62704
ENSGALG00000001462	ENSGALG00000001462	-	ADORA3	chr26:3223602-3225944	ENSG00000282608	ADORA3	chr1:111499429-111503760	0.375991	0.431799	0.462882	0.424487	0.737075	0.392628	0.281755	0.482661	0.651472	0.469306	0.383698	0.506507		0.466688	0.123182
ENSGALG00000001463	ENSGALG00000001463	PDIK1L	PDIK1L	chr23:3215344-3218935	ENSG00000175087	PDIK1L	chr1:26111165-26125543	3.98171	3.84432	3.132	3.93834	4.11835	5.46184	4.26441	5.08496	2.78404	2.94467	4.24569	4.18149		3.99849	0.790016
ENSGALG00000001465	ENSGALG00000001465	RPL38	RPL38	chr18:9191871-9194395	ENSG00000172809	RPL38	chr17:74203582-74210655	2012.61	1971.66	2392.79	1913.02	2734.08	1980.94	2043.53	2258.57	3426.05	2991.77	2389.43	2260.5		2364.58	468.317
ENSGALG00000001467	ENSGALG00000001467	ANKFY1	ANKFY1	chr19:3146815-3171826	ENSG00000185722	ANKFY1	chr17:4163907-4263977	10.9186	9.18025	7.39784	8.76985	7.56988	12.1474	9.03402	9.86326	4.12502	3.77275	6.05624	7.09933		7.99454	2.52744
ENSGALG00000001470	ENSGALG00000001470	STOML1	STOML1	chr10:2548210-2551299	ENSG00000067221	STOML1	chr15:73978923-73994622	0.447739	0.790201	1.45459	0.400179	0.694868	1.24924	0.597647	0.511901	2.211	0.969138	1.57609	0.672846		0.96462	0.552857
ENSGALG00000001472	ENSGALG00000001472	JAM3	JAM3	chr24:2491131-2515882	ENSG00000166086	JAM3	chr11:134068925-134152001	54.0886	57.964	43.3742	44.6056	32.7812	43.4574	56.8162	65.4884	26.5341	34.4456	34.1995	44.1739		44.8274	11.8087
ENSGALG00000001473	ENSGALG00000001473	MIB2	MIB2	chr21:2039788-2073019	ENSG00000197530	MIB2	chr1:1615415-1630610	8.0084	10.579	9.63277	7.59476	9.46979	8.0897	7.08895	8.29367	8.56991	7.83088	7.07249	5.76803		8.16653	1.29435
ENSGALG00000001474	ENSGALG00000001474	RAB14	RAB14	chr17:8863066-8878261	ENSG00000119396	RAB14	chr9:121178137-121223014	95.0312	96.6654	89.8449	105.73	92.4616	82.4103	95.5048	84.5005	84.6798	83.2538	81.2528	103.881		91.268	8.34007
ENSGALG00000001475	ENSGALG00000001475	-	STMN1	chr23:3242122-3252831	ENSG00000117632	STMN1	chr1:25884181-25906991	545.07	619.159	792.666	645.704	869.382	714.893	670.244	667.769	927.263	921.888	1023.29	758.468		762.983	145.891
ENSGALG00000001476	ENSGALG00000001476	RAP1A	RAP1A	chr26:3234993-3256864	ENSG00000116473	RAP1A	chr1:111542218-111716691	24.4858	17.0501	13.6394	27.0368	16.5204	12.9632	26.2498	14.1176	10.7171	18.9365	26.8834	39.9968		20.7164	8.43414
ENSGALG00000001479	ENSGALG00000001479	CYB5D2	CYB5D2	chr19:3177599-3181452	ENSG00000167740	CYB5D2	chr17:4143168-4187310	4.6846	5.39693	5.06015	5.49784	4.66666	4.4206	5.07023	4.43788	6.68043	6.32265	7.9782	6.30097		5.5431	1.08176
ENSGALG00000001480	ENSGALG00000001480	FAM212B	FAM212B	chr26:3267005-3277521	ENSG00000197852	FAM212B	chr1:111680630-111755824	9.23257	6.63223	5.83147	9.49493	7.09489	5.38767	7.69572	6.03966	5.27178	7.37737	15.2796	21.2843		8.88518	4.7654
ENSGALG00000001483	ENSGALG00000001483	-	ENSGALG00000001483	chr21:2097420-2103217				20.9878	42.3322	101.302	19.5287	69.1181	76.8698	22.3175	52.8932	128.772	59.9923	20.9398	10.6735		52.1439	36.8829
ENSGALG00000001486	ENSGALG00000001486	ZAP70	ZAP70	chr28:1808131-1829433	ENSG00000115085	ZAP70	chr2:97713560-97739862	1.05227	0.235575	0.133562	0.994599	0.0942909	0.151728	1.13238	0.360607	0.0644497	0.552716	1.23706	2.54813		0.713114	0.728923
ENSGALG00000001489	ENSGALG00000001489	-	SSU72	chr21:2113221-2135244	ENSG00000284018	SSU72P5	chr11:4233288-4233872	121.758	98.6263	99.7155	119.4	122.503	88.0877	126.913	113.523	116.594	115.335	115.667	143.122		115.104	14.4135
ENSGALG00000001490	ENSGALG00000001490	KCNJ13	KCNJ13	chr9:970023-1043632	ENSG00000115474	KCNJ13	chr2:232766464-232776568	0	0.13106	0	0	0	0	0.0403837	0	0.0448199	0	0.0942771	0.0395984		0.0291783	0.0437515
ENSGALG00000001491	ENSGALG00000001491	-	ENSGALG00000001491	chr24:2527245-2545436	ENSG00000151503	NCAPD3	chr11:134150119-134225454	20.1157	16.8849	16.1364	17.0853	15.1131	26.6013	19.787	20.0218	10.421	12.9727	13.8437	15.2808		17.022	4.21612
ENSGALG00000001492	ENSGALG00000001492	NDRG3	NDRG3	chr20:842763-901639	ENSG00000101079	NDRG3	chr20:36651766-36746078	25.9609	25.3127	20.4252	25.1636	21.0182	21.9144	26.7274	24.4778	22.5823	28.9562	46.1899	35.5563		27.0237	7.28265
ENSGALG00000001501	ENSGALG00000001501	MAPK1	MAPK1	chr15:505902-529524	ENSG00000100030	MAPK1	chr22:21754500-21867680	32.5035	22.2844	15.0352	26.6709	17.0646	24.1999	26.2999	19.1257	7.46086	11.7865	24.7795	27.4075		21.2182	7.27394
ENSGALG00000001502	ENSGALG00000001502	UTP11	UTP11	chr23:3488719-3493461	ENSG00000183520	UTP11	chr1:38009258-38024824	203.276	214.007	179.248	241.419	239.685	195.196	233.616	240.154	232.208	236.686	189.633	202.929		217.338	22.5337
ENSGALG00000001503	ENSGALG00000001503	TBCD	TBCD	chr18:3271322-3380526	ENSG00000141556	TBCD	chr17:82752064-82945922	47.8637	57.8921	74.055	51.3531	52.8261	58.9002	49.6722	68.5386	87.0925	65.4401	50.6423	44.4791		59.0629	12.5691
ENSGALG00000001504	ENSGALG00000001504	DDX20	DDX20	chr26:3284913-3291217	ENSG00000064703	DDX20	chr1:111755245-111768016	79.8061	71.1795	65.4398	90.6354	78.1084	70.4707	84.8262	76.9412	79.3943	73.958	50.6121	89.0025		75.8645	10.8976
ENSGALG00000001506	ENSGALG00000001506	-	PTTG1	chr13:7818157-7832434	ENSG00000164611	PTTG1	ch5:160421822-160428744	191.065	221.859	224.685	231.263	256.986	192.129	205.814	217.924	279.834	239.829	331.832	224.348		234.797	39.5553
ENSGALG00000001512	ENSGALG00000001512	KCND3	KCND3	chr26:3299027-3392004	ENSG00000171385	KCND3	chr1:111770662-111989155	1.42953	1.29519	2.60019	0.838597	1.02602	1.51151	0.74829	1.53824	1.66099	1.17122	1.48648	1.22291		1.37743	0.478331
ENSGALG00000001513	ENSGALG00000001513	CNTRL	CNTRL	chr17:8830008-8862193	ENSG00000119397	CNTRL	chr9:121074863-121177610	3.90183	3.38801	4.14301	4.03735	4.57545	3.14105	3.52887	3.6202	3.80067	3.52626	5.30783	3.65142		3.88516	0.586128
ENSGALG00000001518	ENSGALG00000001518	ZNF750	ZNF750	chr18:3271322-3380526	ENSG00000141579	ZNF750	chr17:82829435-82840578	0.0694902	0.0356774	0	0.109834	0.0357005	0.0172342	0.06596	0.0141241	0.0366029	0.0313904	0.0192483	0		0.0362718	0.0319017
ENSGALG00000001521	ENSGALG00000001521	VPS26B	VPS26B	chr24:2545921-2552580	ENSG00000151502	VPS26B	chr11:134224645-134247792	60.3444	53.2856	37.0507	57.6658	43.2749	43.2064	56.4256	50.6279	28.8471	31.9808	34.7543	54.2073		45.9726	10.8918
ENSGALG00000001522	ENSGALG00000001522	PHF20	PHF20	chr20:907735-969270	ENSG00000025293	PHF20	chr20:35771974-35950381	39.0318	40.2751	45.9548	42.9166	51.2223	36.2719	37.1945	41.5916	49.9025	41.6335	35.3331	36.9577		41.5238	5.21469
ENSGALG00000001525	ENSGALG00000001525	CALCOCO2	CALCOCO2	chr27:3648587-4003342	ENSG00000136436	CALCOCO2	chr17:48830988-48866522	25.4587	25.3271	26.7616	26.4806	25.7534	29.1296	25.3055	23.2783	22.0153	22.6242	14.0448	17.0373		23.6014	4.27244
ENSGALG00000001527	ENSGALG00000001527	VWA1	VWA1	chr21:2171723-2181323	ENSG00000179403	VWA1	chr1:1434861-1442882	0.13859	0	0.0360193	0.0521551	0.0296667	0	0.0274061	0.0938961	0	0.0260851	0	0.0268732		0.035891	0.04223
ENSGALG00000001529	ENSGALG00000001529	-	THYN1	chr24:2556106-2568256	ENSG00000151500	THYN1	chr11:134248279-134253370	59.9444	60.2895	49.599	80.1291	76.1814	49.4314	77.6446	65.1666	67.3558	88.2485	121.027	85.3343		73.3626	19.7726
ENSGALG00000001531	ENSGALG00000001531	FN3K	FN3K	chr18:3381384-3388468	ENSG00000167363	FN3K	chr17:82735575-82751197	0.454888	0.56927	0.585213	0.590594	0.905579	0.310245	0.377807	0.785889	0.389359	0.642138	0.771753	0.648306		0.58592	0.180698
ENSGALG00000001533	ENSGALG00000001533	TSNAXIP1	TSNAXIP1	chr11:907719-922542	ENSG00000102904	TSNAXIP1	chr16:67806765-67832148	0.298218	0.342483	0.367136	0.425283	0.463658	0.369804	0.242098	0.303069	0.516717	0.336781	0.282593	0.273912		0.351813	0.0820852
ENSGALG00000001534	ENSGALG00000001534	-	TMEM88B	chr21:2197050-2200663	ENSG00000167874	TMEM88	chr17:7855065-7856099	0.14705	0.0471861	0	0.124512	0	0.0683806	0.0654279	0.0747209	0	0.0830325	0.687347	0.149697		0.120613	0.186126
ENSGALG00000001536	ENSGALG00000001536	-	ENSGALG00000001536	chr20:981765-1021213				3.20029	3.49421	9.25188	1.95903	3.66995	8.14316	2.86018	3.84368	5.15836	2.38203	2.63346	3.22767		4.15199	2.28409
ENSGALG00000001538	ENSGALG00000001538	ST7L	ST7L	chr26:3512893-3532806	ENSG00000007341	ST7L	chr1:112523518-112620825	30.8708	31.0444	30.6637	33.7697	25.1053	25.9967	32.1522	32.589	33.8892	33.7057	41.1777	35.7025		32.2222	4.20905
ENSGALG00000001540	ENSGALG00000001540	SF3A3	SF3A3	chr23:3522851-3529744	ENSG00000183431	SF3A3	chr1:37956975-37990921	146.366	156.704	180.94	166.793	217.781	171.303	165.094	178.266	211.786	223.075	247.759	151.159		184.752	32.4673
ENSGALG00000001542	ENSGALG00000001542	MRPL20	MRPL20	chr21:2205336-2219935	ENSG00000242485	MRPL20	chr1:1401908-1407313	137.155	130.331	109.703	151.659	182.078	111.486	148.669	126.24	153.864	152.211	134.03	163.207		141.719	21.0704
ENSGALG00000001545	ENSGALG00000001545	-	RAB40B	chr18:3404609-3428181	ENSG00000172476	RAB40A	chrX:103499130-103519489	1.16612	0.852321	0.782938	0.987394	0.998484	0.943942	0.922398	0.576084	0.810449	1.00597	1.34586	0.734876		0.927236	0.201786
ENSGALG00000001546	ENSGALG00000001546	ZZEF1	ZZEF1	chr19:3181798-3232934	ENSG00000074755	ZZEF1	chr17:4004445-4143020	2.8221	2.30308	3.47345	2.11501	1.61143	3.75955	2.23092	2.6654	1.77891	1.3082	1.65195	1.52768		2.27064	0.779733
ENSGALG00000001547	ENSGALG00000001547	CAPZA1	CAPZA1	chr26:3532930-3542982	ENSG00000116489	CAPZA1	chr1:112619173-112671619	104.131	116.542	99.4962	114.258	113.8	118.004	113.233	115.421	106.428	97.4136	75.2428	88.4811		105.204	13.1092
ENSGALG00000001550	ENSGALG00000001550	RBM39	RBM39	chr20:1032942-1061646	ENSG00000131051	RBM39	chr20:35701347-35742312	139.83	127.826	138.611	153.313	173.525	145.545	151.554	146.042	157.646	149.722	109.665	138.503		144.315	15.8314
ENSGALG00000001551	ENSGALG00000001551	CCNL2	CCNL2	chr21:2205336-2219935	ENSG00000221978	CCNL2	chr1:1385711-1399328	57.187	52.356	56.6125	55.2483	55.2017	49.7033	50.898	55.3563	50.838	44.8659	47.1222	58.297		52.8072	4.20752
ENSGALG00000001555	ENSGALG00000001555	AURKAIP1	AURKAIP1	chr21:2230097-2232688	ENSG00000175756	AURKAIP1	chr1:1373730-1375495	187.791	190.458	194.048	204.185	239.133	176.767	190.89	194.475	260.899	225.811	190.855	215.329		205.887	24.7816
ENSGALG00000001557	ENSGALG00000001557	ACAD8	ACAD8	chr24:2556106-2568256	ENSG00000151498	ACAD8	chr11:134253495-134265855	12.45	9.43435	5.18318	13.3958	8.66148	6.35396	11.8862	8.20312	6.53019	8.03299	9.23844	9.62976		9.08329	2.51304
ENSGALG00000001558	ENSGALG00000001558	MOV10	MOV10	chr26:3544655-3556153	ENSG00000155363	MOV10	chr1:112673141-112700746	4.81422	2.1312	1.54189	5.03192	1.63511	1.42841	4.78776	2.26671	1.69446	3.04782	5.42161	6.08355		3.32372	1.76298
ENSGALG00000001559	ENSGALG00000001559	ZP3	ZP3	chr10:2565043-2567437	ENSG00000188372	ZP3	chr7:76397518-76442071	8.03786	5.86263	2.74558	8.44081	5.50591	3.79707	8.29559	5.73099	4.46903	7.37706	14.4187	15.9123		7.54946	3.9968
ENSGALG00000001561	ENSGALG00000001561	MXRA8	MXRA8	chr21:2244923-2259769	ENSG00000162576	MXRA8	chr1:1352689-1361777	1.01501	1.20629	2.52072	1.63219	1.37606	1.4218	1.22851	2.75068	3.48997	1.80427	1.50986	1.22462		1.765	0.758348
ENSGALG00000001563	ENSGALG00000001563	WDR45B	WDR45B	chr18:3428800-3443839	ENSG00000141580	WDR45B	chr17:82614562-82648553	35.5558	34.8514	36.1185	35.2762	32.7068	38.3908	34.8723	37.1137	35.2852	41.623	47.9672	35.6834		37.1204	4.06211
ENSGALG00000001564	ENSGALG00000001564	ATP2A3	ATP2A3	chr19:3247311-3281243	ENSG00000074370	ATP2A3	chr17:3923870-3964464	0.122317	0.156999	0.241605	0.0920627	0.0314201	0.192127	0.0774023	0.107733	0.204025	0.0920896	0.395278	0.0664101		0.148289	0.0994723
ENSGALG00000001565	ENSGALG00000001565	C5	C5	chr17:8801958-8828360	ENSG00000106804	C5	chr9:120952335-121050276	0.676178	0.469782	0.50303	0.70036	0.605534	0.68464	0.772843	0.535872	0.302251	0.539435	0.82479	0.793902		0.617385	0.153813
ENSGALG00000001568	ENSGALG00000001568	-	NFS1	chr20:1065262-1076748	ENSG00000272897	AL109827.1	chr20:35632340-35674544	50.6075	42.7651	42.9935	49.6803	43.6429	40.7465	52.5918	47.2396	38.0494	45.6003	42.0406	54.5172		45.8729	5.07953
ENSGALG00000001569	ENSGALG00000001569	RHOC	RHOC	chr26:3544655-3556153	ENSG00000155366	RHOC	chr1:112701106-112707434	13.2473	11.8178	4.75739	12.2106	7.4764	3.90721	19.1443	15.5524	11.44	23.6174	18.2031	14.6729		13.0039	5.81934
ENSGALG00000001571	ENSGALG00000001571	MYO1F	MYO1F	chr28:1741274-1754399	ENSG00000142347	MYO1F	chr19:8520790-8577577	0.0430814	0.110594	0.17467	0.0486382	0.022133	0.0747921	0.0613393	0.0437823	0.124809	0.126496	0.0357997	0.0100244		0.0730133	0.0501949
ENSGALG00000001572	ENSGALG00000001572	COMMD4	COMMD4	chr10:2568307-2570032	ENSG00000140365	COMMD4	chr15:75335891-75343224	42.0632	55.5065	66.4694	41.304	63.4389	51.6004	43.7707	55.4438	86.4859	69.3734	66.6488	50.7616		57.7389	13.3396
ENSGALG00000001573	ENSGALG00000001573	P2RX1	P2RX1	chr19:3288226-3295581	ENSG00000108405	P2RX1	chr17:3896592-3916500	0	0	0.281096	0	0	0.127437	0	0.05222	0.101497	0.0870434	0.166438	0.0349523		0.0708903	0.0876347
ENSGALG00000001577	ENSGALG00000001577	FOXK2	FOXK2	chr18:3449626-3532446	ENSG00000141568	FOXK2	chr17:82519713-82644662	22.0765	18.7286	12.865	18.4419	17.3169	16.3229	21.1877	20.8351	9.45705	13.271	14.2364	18.3505		16.9241	3.82496
ENSGALG00000001583	ENSGALG00000001583	TRAF1	TRAF1	chr17:8783104-8792615	ENSG00000056558	TRAF1	chr9:120902393-120929173	7.59802	5.90151	4.96374	7.73813	6.6572	6.004	6.35249	5.30474	4.57709	3.92528	2.71942	6.54114		5.69023	1.47496
ENSGALG00000001586	ENSGALG00000001586	NEIL1	NEIL1	chr10:2570400-2574557	ENSG00000140398	NEIL1	chr15:75346955-75357114	7.79944	5.99271	7.91134	7.826	5.84959	6.4081	7.47484	6.13634	9.05727	8.28495	6.85794	10.9705		7.54742	1.47353
ENSGALG00000001587	ENSGALG00000001587	MRPL40	MRPL40	chr15:662327-663927	ENSG00000185608	MRPL40	chr22:19431902-19436075	207.291	212.496	198.66	247.042	259.984	180.403	243.828	226.518	254.125	270.119	224.883	265.678		232.586	28.7108
ENSGALG00000001592	ENSGALG00000001592	ACER1	ACER1	chr28:1703462-1712060	ENSG00000167769	ACER1	chr19:6306142-6333629	0.0577933	0	0.0901225	0.0652476	0.261159	0	0.274686	0.0587335	0.267761	0.0574075	0	0.0591418		0.0993377	0.105701
ENSGALG00000001593	ENSGALG00000001593	Ufd1l	Ufd1l	chr15:665554-671767	ENSG00000070010	UFD1	chr22:19449910-19479215	46.5468	58.7152	78.1653	49.7156	69.1899	67.6025	60.5464	76.0837	95.1753	90.3463	71.181	49.6187		67.7406	15.6426
ENSGALG00000001595	ENSGALG00000001595	PHF19	PHF19	chr17:8774162-8779074	ENSG00000119403	PHF19	chr9:120855652-120894896	5.65231	5.53007	2.90156	4.45129	5.47157	4.25123	4.40187	3.21332	3.29571	3.01301	1.66928	4.08301		3.99452	1.22101
ENSGALG00000001596	ENSGALG00000001596	MLLT1	MLLT1	chr28:1663595-1689911	ENSG00000130382	MLLT1	chr19:6210379-6279948	20.3286	23.7516	22.465	18.6242	22.1878	28.9947	17.8467	24.1372	17.8103	17.6345	20.1792	17.0467		20.9172	3.55022
ENSGALG00000001597	ENSGALG00000001597	PSMB3	PSMB3	chr27:4430362-4433166	ENSG00000277791	PSMB3	chr17:38752736-38764231	248.746	258.231	266.324	260.479	283.577	241.777	278.764	285.705	395.417	364.697	353.883	304.09		295.141	49.8264
ENSGALG00000001600	ENSGALG00000001600	DVL1	DVL1	chr21:2268369-2322090	ENSG00000107404	DVL1	chr1:1335276-1349350	2.72393	1.48989	0.627497	2.04435	1.86853	1.38182	2.16687	1.24256	0.692937	0.803997	1.09318	1.1524		1.44066	0.64641
ENSGALG00000001602	ENSGALG00000001602	NUTF2	NUTF2	chr11:949337-971783	ENSG00000102898	NUTF2	chr16:67846732-67872567	319.014	350.325	384.318	342.354	363.955	354.609	365.168	407.438	508.381	455.439	397.576	354.059		383.553	53.0127
ENSGALG00000001603	ENSGALG00000001603	NARF	NARF	chr18:3449626-3532446	ENSG00000141562	NARF	chr17:82458180-82490537	2.51975	2.28681	2.54014	2.81601	2.41904	2.96679	1.93272	2.5866	1.84339	1.9258	5.56951	3.76067		2.76394	1.02855
ENSGALG00000001604	ENSGALG00000001604	-	ENSGALG00000001604	chr24:2568407-2587817	ENSG00000166105	GLB1L3	chr11:134274245-134319564	35.8108	24.4686	11.3597	34.9123	21.9295	18.6511	28.6812	19.0669	11.2604	16.1713	13.6642	28.0515		22.0023	8.51019
ENSGALG00000001605	ENSGALG00000001605	PPM1J	PPM1J	chr26:3558024-3564463	ENSG00000155367	PPM1J	chr1:112709994-112715477	0.536219	0.389016	0.254489	0.684344	0.269493	0.346923	0.802195	0.37909	0.399108	0.789859	1.06553	1.19346		0.592477	0.313728
ENSGALG00000001606	ENSGALG00000001606	INPP5B	INPP5B	chr23:3536304-3564494	ENSG00000204084	INPP5B	chr1:37860697-37947057	18.1515	27.2892	27.808	15.347	23.3985	19.279	14.0793	24.8207	22.3102	28.6471	48.3642	16.8511		23.8621	9.17054
ENSGALG00000001607	ENSGALG00000001607	C17orf62	C17orf62	chr18:3536062-3544410	ENSG00000178927	C17orf62	chr17:82442589-82450829	1.138	1.22122	1.57095	1.0531	1.26993	1.68878	1.30597	1.08068	1.3266	1.55905	2.29954	1.30228		1.40134	0.345184
ENSGALG00000001608	ENSGALG00000001608	UNC5D	UNC5D	chr22:1798071-1927838	ENSG00000156687	UNC5D	chr8:35235457-35796550	1.4492	1.31251	1.03112	1.58547	1.59642	1.87522	1.19241	0.951746	1.31905	1.27377	1.42928	1.36398		1.36501	0.252072
ENSGALG00000001610	ENSGALG00000001610	PIP4K2B	PIP4K2B	chr27:4437428-4450515	ENSG00000276293	PIP4K2B	chr17:38765689-38800126	18.6622	16.6171	13.9178	14.8153	12.9957	14.1046	15.2949	13.4573	8.98454	8.89238	17.246	16.1128		14.2584	2.98008
ENSGALG00000001611	ENSGALG00000001611	B3GAT1	B3GAT1	chr24:2590101-2619976	ENSG00000109956	B3GAT1	chr11:134378504-134411918	0.865363	0.773544	2.16875	0.48849	0.853432	1.89707	0.293358	0.675285	1.81106	0.698046	1.3055	0.539351		1.03077	0.615791
ENSGALG00000001613	ENSGALG00000001613	GNL3	GNL3	chr12:719422-885652	ENSG00000163938	GNL3	chr3:52681156-52694492	301.862	346.583	346.72	332.483	409.3	306.896	344.695	368.605	428.382	365.978	237.865	301.801		340.931	51.0835
ENSGALG00000001615	ENSGALG00000001615	MAN2C1	MAN2C1	chr10:2574727-2587477	ENSG00000140400	MAN2C1	chr15:75355207-75368630	5.86789	5.03279	4.12829	5.93659	4.26486	4.2869	5.63456	4.57652	4.42059	5.12668	5.29187	6.44583		5.08445	0.766582
ENSGALG00000001616	ENSGALG00000001616	CDC45	CDC45	chr15:672189-684562	ENSG00000093009	CDC45	chr22:19479459-19520612	63.8286	74.9776	69.0448	63.3317	66.6095	62.2169	65.9063	73.0247	64.9933	58.9463	49.6474	59.6045		64.3443	6.68732
ENSGALG00000001617	ENSGALG00000001617	CAMKK1	CAMKK1	chr19:3300491-3382167	ENSG00000004660	CAMKK1	chr17:3860315-3894891	12.7952	11.2057	6.05065	13.6633	9.78907	5.91896	13.2998	11.8298	6.89377	6.55543	2.0685	7.20131		8.93929	3.66772
ENSGALG00000001618	ENSGALG00000001618	OGFOD3	OGFOD3	chr18:3560688-3587092	ENSG00000181396	OGFOD3	chr17:82389223-82418637	23.3361	23.2967	20.2168	19.5599	19.603	26.234	18.9483	20.4818	14.1233	12.6445	11.0997	15.5632		18.7589	4.58906
ENSGALG00000001619	ENSGALG00000001619	ATG16L1	ATG16L1	chr9:1162777-1181569	ENSG00000085978	ATG16L1	chr2:233210051-233295674	26.6	21.382	19.0041	24.1158	20.0407	25.5607	23.1583	23.7756	15.8968	17.9886	22.5389	26.7945		22.238	3.46337
ENSGALG00000001620	ENSGALG00000001620	-	ENSGALG00000001620	chr17:8764466-8771954				0.416957	0.356787	0.487652	0.517387	0.469898	0.689398	1.03759	0.247182	0.423353	0.824033	1.7324	1.01372		0.684696	0.415801
ENSGALG00000001621	ENSGALG00000001621	CLDN5	CLDN5	chr15:701149-702907	ENSG00000184113	CLDN5	chr22:19523024-19527545	0.789964	0.890299	0.691046	0.696082	0.519676	1.21852	0.754406	0.626587	0.938766	0.718044	2.0814	0.9639		0.907391	0.412668
ENSGALG00000001624	ENSGALG00000001624	CWC25	CWC25	chr27:4451018-4455696	ENSG00000273559	CWC25	chr17:38800434-38825481	41.1824	41.1964	41.3657	48.6636	57.6411	35.9233	42.6802	40.6443	53.5229	49.4318	52.0293	54.771		46.5877	6.93558
ENSGALG00000001626	ENSGALG00000001626	UTS2R	UTS2R	chr18:3697634-3702015	ENSG00000181408	UTS2R	chr17:82374230-82375586	0	0.0222041	0	0.0390608	0	0	0	0	0.0455602	0	0	0.0201263		0.0105793	0.0169398
ENSGALG00000001630	ENSGALG00000001630	DHX33	DHX33	chr19:3394139-3402980	ENSG00000005100	DHX33	chr17:5440912-5469060	111.628	126.36	119.879	106.81	109.56	120.873	110.843	125.904	130.926	109.831	81.3419	111.998		113.829	12.9241
ENSGALG00000001632	ENSGALG00000001632	MIS12	MIS12	chr19:3387551-3388959	ENSG00000167842	MIS12	chr17:5486285-5490814	24.5128	32.1333	28.4944	28.4885	31.1962	23.7072	26.0462	28.1203	30.6425	31.8659	31.8834	29.0396		28.8442	2.88792
ENSGALG00000001633	ENSGALG00000001633	DUSP26	DUSP26	chr22:1636347-1640580	ENSG00000133878	DUSP26	chr8:33591332-33600106	5.89148	4.59319	5.51228	5.76452	4.428	4.3293	4.34948	4.2133	4.79854	6.18512	14.7777	10.0276		6.23921	3.12648
ENSGALG00000001634	ENSGALG00000001634	-	RPL23	chr27:4463075-4465031				3279.95	3614.94	3728.53	3687.98	5544.98	3676.09	4226.59	4203.74	5429.36	4842.52	3742.01	3716.11		4141.07	743.688
ENSGALG00000001637	ENSGALG00000001637	PSMD5	PSMD5	chr17:8757678-8764389	ENSG00000095261	PSMD5	chr9:120815496-120842984	31.2963	30.5944	25.5683	33.6672	31.4015	25.6922	33.1633	28.2258	26.216	26.9651	30.6518	35.589		29.9192	3.35627
ENSGALG00000001639	ENSGALG00000001639	MTF1	MTF1	chr23:3536304-3564494	ENSG00000188786	MTF1	chr1:37809567-37859620	7.03678	4.98259	4.19084	5.70179	4.40219	5.48993	5.25287	4.92143	3.31672	4.17862	8.19931	6.04191		5.30958	1.3363
ENSGALG00000001640	ENSGALG00000001640	RNF122	RNF122	chr22:1629876-1635315	ENSG00000133874	RNF122	chr8:33547755-33567125	11.9298	11.469	14.5268	15.0246	20.5111	14.2041	12.2937	11.6891	19.903	16.4783	29.885	23.114		16.7524	5.62612
ENSGALG00000001642	ENSGALG00000001642	GLT8D1	GLT8D1	chr12:719422-885652	ENSG00000016864	GLT8D1	chr3:52694488-52706032	19.454	23.7322	28.5992	17.1951	23.2777	25.6084	16.5915	21.3251	29.7343	20.5613	18.9522	16.8301		21.8218	4.45181
ENSGALG00000001644	ENSGALG00000001644	SIN3A	SIN3A	chr10:2590069-2610361	ENSG00000169375	SIN3A	chr15:75369379-75455842	41.5784	46.5965	51.8441	38.156	49.9194	66.8537	39.2322	51.3905	47.5239	36.3205	30.7497	37.6472		44.8177	9.6402
ENSGALG00000001645	ENSGALG00000001645	KCNT1	KCNT1	chr17:8697925-8724149	ENSG00000107147	KCNT1	chr9:135702185-135795508	0.23774	0.150064	0.27854	0.30422	0.178608	0.203103	0.235481	0.380513	0.390289	0.514605	1.94482	0.208016		0.418833	0.491773
ENSGALG00000001647	ENSGALG00000001647	PSKH1	PSKH1	chr11:1010934-1031465	ENSG00000159792	PSKH1	chr16:67893272-67929678	6.74679	5.51712	4.35543	4.75039	4.98492	7.39925	4.82025	5.10554	2.38829	2.78552	4.04406	5.16964		4.83893	1.4127
ENSGALG00000001651	ENSGALG00000001651	TTI2	TTI2	chr22:1625806-1629203	ENSG00000129696	TTI2	chr8:33473386-33513601	8.39698	8.5589	7.97206	8.83874	7.4225	7.74823	7.14992	7.75552	10.0168	8.98078	9.95348	11.4933		8.6906	1.26775
ENSGALG00000001652	ENSGALG00000001652	-	SEPT2L	chr15:711032-740520				95.7	99.9844	97.1683	105.815	102.215	92.0281	109.933	103.13	105.409	113.539	114.97	104.48		103.698	6.94068
ENSGALG00000001653	ENSGALG00000001653	MANEAL	MANEAL	chr23:3574707-3578036	ENSG00000185090	MANEAL	chr1:37793802-37801137	1.66635	1.11939	1.38424	1.65271	1.14011	0.772466	1.36735	1.17118	1.10741	1.96976	5.34899	2.3554		1.75461	1.2112
ENSGALG00000001654	ENSGALG00000001654	C1QBP	C1QBP	chr19:3403633-3406149	ENSG00000108561	C1QBP	chr17:5432777-5448830	854.711	967.718	1009.5	873.097	1299.19	984.331	970.16	1063.85	1334.75	1170.43	897.773	880.014		1025.46	162.717
ENSGALG00000001655	ENSGALG00000001655	SPCS1	SPCS1	chr12:719422-885652	ENSG00000114902	SPCS1	chr3:52704955-52711146	386.486	367.3	420.182	445.469	497.433	420.429	449.682	430.733	598.914	577.127	528.524	460.777		465.255	72.0511
ENSGALG00000001658	ENSGALG00000001658	RPL19	RPL19	chr27:4534536-4536944	ENSG00000108298	RPL19	chr17:39200283-39204727	2928.54	3380.56	3358.46	3349.09	4057.05	3150.57	3436.26	3795.92	5140.86	4486.32	3510.94	3364.19		3663.23	623.171
ENSGALG00000001661	ENSGALG00000001661	SLC22A7	SLC22A7	chr3:15989659-16003916	ENSG00000137204	SLC22A7	chr6:43295694-43305538	0.0803724	0.0206322	0.100266	0.0362956	0.0412911	0	0.0190723	0.114352	0.0846699	0.0181531	0.0222625	0.130911		0.0556898	0.0440214
ENSGALG00000001662	ENSGALG00000001662	ATP10B	ATP10B	chr13:7701390-7750388	ENSG00000118322	ATP10B	chr5:160563120-160852214	0.127585	0.172859	0.618974	0.0160046	0.446082	1.11627	0.03364	0.172881	0.392022	0.144084	0.206151	0.0494789		0.291336	0.317158
ENSGALG00000001663	ENSGALG00000001663	MAK16	MAK16	chr22:1622613-1625795	ENSG00000198042	MAK16	chr8:33484750-33501260	257.189	265.182	246.669	298.098	347.827	234.351	289.72	284.348	312.203	282.69	183.445	273.426		272.929	41.3263
ENSGALG00000001664	ENSGALG00000001664	PTPN9	PTPN9	chr10:2614899-2619795	ENSG00000169410	PTPN9	chr15:75463251-75579289	16.8414	23.1516	34.2655	15.5635	21.0334	19.3189	15.9031	21.2845	43.9831	33.5932	31.1227	24.0961		25.0131	8.85205
ENSGALG00000001666	ENSGALG00000001666	RPAIN	RPAIN	chr19:3406914-3408629	ENSG00000129197	RPAIN	chr17:5419641-5432876	71.9432	84.083	87.405	62.6675	84.5357	75.4656	66.688	91.0768	109.03	92.8029	110.483	97.0497		86.1025	15.2481
ENSGALG00000001668	ENSGALG00000001668	-	UBE2R2	chrZ:7304114-7355704	ENSG00000107341	UBE2R2	chr9:33817567-33920404	60.1281	63.5868	54.3419	63.5478	64.9127	59.1999	62.1345	55.8955	48.8757	47.3379	48.6985	60.9196		57.4649	6.31872
ENSGALG00000001678	ENSGALG00000001678	PRKAB2	PRKAB2	chr8:4300209-4347886	ENSG00000131791	PRKAB2	chr1:147155106-147172550	10.2963	9.98694	8.40617	9.06315	9.19812	7.47677	9.91364	8.88078	10.6572	8.36864	8.00378	10.2905		9.21183	1.02175
ENSGALG00000001682	ENSGALG00000001682	FBXL20	FBXL20	chr27:4539318-4552233	ENSG00000108306	FBXL20	chr17:39252644-39402523	12.3641	13.0632	16.7766	9.82437	16.1868	14.7801	9.93358	14.0333	13.7027	8.83973	19.8204	11.8873		13.4343	3.18868
ENSGALG00000001684	ENSGALG00000001684	SEC14L1	SEC14L1	chr18:4117289-4155810	ENSG00000129657	SEC14L1	chr17:77086716-77217101	5.84476	7.93354	8.15186	5.23106	5.62569	5.92272	4.93469	7.71851	7.47826	5.6435	9.23658	5.33709		6.58819	1.42364
ENSGALG00000001688	ENSGALG00000001688	SEPT5	SEPT5	chr15:742947-780197	ENSG00000184702	SEPT5	chr22:19714464-19724772	14.0175	10.8087	10.5681	12.6625	8.36313	9.12023	11.5061	9.4233	9.68795	11.4365	19.2575	20.8745		12.3105	3.95792
ENSGALG00000001689	ENSGALG00000001689	SCAMP2	SCAMP2	chr10:2335045-2343868	ENSG00000140497	SCAMP2	chr15:74843730-74873365	81.7779	83.686	87.1199	75.0865	66.6185	74.8389	81.0975	80.7435	99.7089	96.6775	97.8178	90.9411		84.6762	10.182
ENSGALG00000001690	ENSGALG00000001690	GABRB2	GABRB2	chr13:7347872-7480663	ENSG00000145864	GABRB2	chr5:161288429-161549044	2.0612	3.27865	5.64407	1.9069	4.32351	6.10905	1.16912	2.71787	3.12447	2.15275	3.23061	1.47328		3.09929	1.56651
ENSGALG00000001691	ENSGALG00000001691	INTS11	INTS11	chr21:2335817-2343146	ENSG00000127054	INTS11	chr1:1311585-1324691	64.4943	65.1748	62.0668	73.2747	82.7034	68.1516	67.2624	68.2637	87.7455	80.9217	46.9928	65.8103		69.4052	10.7846
ENSGALG00000001692	ENSGALG00000001692	CAMSAP1	CAMSAP1	chr17:8664567-8692120	ENSG00000130559	CAMSAP1	chr9:135808487-135907228	6.87136	5.98227	5.45968	6.2182	5.92608	6.20887	5.86524	5.58159	3.43209	4.34085	10.8753	7.99686		6.22987	1.854
ENSGALG00000001693	ENSGALG00000001693	SLC18A1	SLC18A1	chr22:1615878-1621635	ENSG00000036565	SLC18A1	chr8:20144855-20183206	1.29399	1.09788	0.923419	1.18852	0.985911	0.543935	1.04089	0.824687	0.953071	0.643971	0.850501	1.45443		0.983434	0.258059
ENSGALG00000001695	ENSGALG00000001695	GABRA6	GABRA6	chr13:7281999-7303586	ENSG00000145863	GABRA6	chr5:161547063-161702593	1.09069	1.08885	1.70082	1.25874	0.778253	1.2924	0.833981	1.10844	1.37243	0.711669	0.537092	0.47938		1.02106	0.363074
ENSGALG00000001696	ENSGALG00000001696	SAG	SAG	chr9:1187619-1202062	ENSG00000130561	SAG	chr2:233307816-233347055	0.500185	0.74901	0.519991	0.815678	0.678113	0.827003	1.121	0.564802	0.695255	0.659009	0.885165	1.39017		0.783782	0.257317
ENSGALG00000001697	ENSGALG00000001697	-	ENSGALG00000001697	chr12:719422-885652	ENSG00000162267	ITIH3	chr3:52794768-52809009	0.0402654	0.0172469	0	0.0146196	0.0172581	0.0321155	0.0318859	0	0	0.0151745	0.0372194	0.015633		0.0184515	0.0143111
ENSGALG00000001698	ENSGALG00000001698	GABRA1	GABRA1	chr13:7191327-7233372	ENSG00000022355	GABRA1	chr5:161847063-161899981	5.23987	8.54567	7.05947	6.46362	9.52514	6.72335	5.03846	6.70455	6.58051	3.86218	1.32328	4.17295		5.93659	2.19162
ENSGALG00000001701	ENSGALG00000001701	-	ENSGALG00000001701	chr21:2344812-2345856				1.70943	1.27991	1.49944	1.24641	1.87536	0.662429	1.2254	1.33912	0.656555	1.04568	1.38104	1.40874		1.27746	0.362606
ENSGALG00000001702	ENSGALG00000001702	EXOC3L1	EXOC3L1	chr11:1039642-1046923	ENSG00000179044	EXOC3L1	chr16:67184366-67190204	15.222	20.4346	13.5025	11.8786	15.1396	14.3825	13.6234	15.8394	14.7558	10.9617	7.27587	12.0887		13.7587	3.17069
ENSGALG00000001708	ENSGALG00000001708	MED1	MED1	chr27:4561651-4572376	ENSG00000125686	MED1	chr17:39404285-39451286	20.3041	12.6755	10.2527	16.6679	12.4129	18.9693	18.2909	14.3544	5.74305	7.46964	9.36132	15.4136		13.4929	4.66768
ENSGALG00000001709	ENSGALG00000001709	-	MUSTN1	chr12:719422-885652	ENSG00000243696	AC006254.1	chr3:52813282-52835729	0	0	0	0	0	0	0	0.0876253	0.113541	0.0973723	0	0		0.0248782	0.0453512
ENSGALG00000001711	ENSGALG00000001711	PPCDC	PPCDC	chr10:2292952-2312058	ENSG00000138621	PPCDC	chr15:75023555-75117462	7.38941	7.49621	5.83865	7.95659	6.49215	5.52268	7.24356	6.1705	6.36278	6.81611	8.3847	8.88891		7.04685	1.03346
ENSGALG00000001714	ENSGALG00000001714	PUSL1	PUSL1	chr21:2349637-2373504	ENSG00000169972	PUSL1	chr1:1308567-1311677	4.20073	4.6466	4.26055	3.85573	3.99008	4.02329	4.725	4.4079	5.44174	4.3189	3.73666	4.68859		4.35798	0.469598
ENSGALG00000001716	ENSGALG00000001716	C15orf59	C10H15ORF59	chr10:2199546-2206730	ENSG00000205363	C15orf59	chr15:73735431-73752747	0.0213235	0.164218	0.698287	0.0240739	0.0547746	0.396632	0.101201	0.281715	0.533513	0.144485	0.0590645	0.0744252		0.212809	0.220869
ENSGALG00000001717	ENSGALG00000001717	SLC16A1	SLC16A1	chr26:3611037-3625981	ENSG00000155380	SLC16A1	chr1:112911847-112957013	165.532	190.066	209.836	158.586	185.418	177.978	142.089	152.134	196.542	168.298	125.499	160.631		169.384	23.9513
ENSGALG00000001718	ENSGALG00000001718	CCNG1	CCNG1	chr13:6735704-6741308	ENSG00000113328	CCNG1	chr5:163437569-163446151	373.474	441.854	438.463	395.69	409.652	443.883	371.515	414.629	446.902	341.98	286.82	324.058		390.743	52.3211
ENSGALG00000001720	ENSGALG00000001720	-	ENSGALG00000001720	chr12:719422-885652	ENSG00000248592	TMEM110-MUSTN1	chr3:52833121-52897562	10.538	11.9479	9.85975	7.98106	7.72607	12.1964	9.06493	7.94284	4.2787	5.35532	4.86492	6.07903		8.15291	2.66951
ENSGALG00000001721	ENSGALG00000001721	-	ENSGALG00000001721	chr10:2188133-2191054	ENSG00000188372	ZP3	chr7:76397518-76442071	0.320269	0.284593	0.268922	0.500647	0.0949256	0.336049	0.526153	0.425627	0.616393	0.472971	0.887122	0.888533		0.468517	0.239789
ENSGALG00000001722	ENSGALG00000001722	E2F4	E2F4	chr11:1047692-1059631	ENSG00000205250	E2F4	chr16:67192169-67198918	28.5327	27.6362	23.5924	26.0339	25.146	22.2713	23.5058	26.3928	22.7991	20.405	20.3804	33.1296		24.9854	3.66192
ENSGALG00000001723	ENSGALG00000001723	-	ENSGALG00000001723	chr8:4300209-4347886				0.0851125	0.136557	0	0.120113	0.027329	0.0263858	0.151479	0.0648728	0.0840595	0.0480593	0.0294694	0.0247556		0.0665161	0.0492497
ENSGALG00000001725	ENSGALG00000001725	TNRC6C	TNRC6C	chr18:4027324-4099177	ENSG00000078687	TNRC6C	chr17:77959240-78108835	20.2239	25.4803	65.523	18.4018	38.5994	65.4712	18.5553	34.7163	57.1437	26.6296	15.4668	12.2139		33.2021	19.4245
ENSGALG00000001726	ENSGALG00000001726	NUDCD2	NUDCD2	chr13:6730839-6735374	ENSG00000170584	NUDCD2	chr5:163446526-163460140	54.5233	59.6303	45.4877	61.6345	56.7704	51.2872	61.3697	52.6497	42.4296	49.8065	37.1004	50.4198		51.9258	7.58068
ENSGALG00000001727	ENSGALG00000001727	LZTS1	LZTS1	chr22:1597119-1599410	ENSG00000061337	LZTS1	chr8:20246165-20303963	61.8106	30.848	12.5758	53.4025	36.9043	27.5729	49.4906	25.5823	9.04904	29.6946	64.7464	117.748		43.2854	29.4571
ENSGALG00000001728	ENSGALG00000001728	NACC2	NACC2	chr17:8574484-8624639	ENSG00000148411	NACC2	chr9:136006537-136095285	4.52355	4.41311	10.7842	4.62201	4.25672	8.80473	4.85821	6.35498	13.6209	7.3837	6.29971	6.67341		6.88294	2.9077
ENSGALG00000001729	ENSGALG00000001729	CD276	CD276	chr10:2176060-2184164	ENSG00000103855	CD276	chr15:73683966-73714518	35.6053	43.6141	57.7368	35.5372	38.5676	48.3219	34.945	42.814	65.2105	43.1516	28.0378	34.8593		42.3668	10.529
ENSGALG00000001730	ENSGALG00000001730	DGKD	DGKD	chr9:1203847-1257261	ENSG00000077044	DGKD	chr2:233354507-233472104	7.74862	5.05522	4.8133	5.55627	5.19332	8.81563	5.89682	6.20657	2.32484	3.04364	6.37471	6.12858		5.59646	1.77449
ENSGALG00000001731	ENSGALG00000001731	CDK12	CDK12	chr27:4573381-4599083	ENSG00000167258	CDK12	chr17:39461511-39564907	61.0344	56.3605	52.9315	56.0825	55.2013	63.9585	58.7956	62.5982	51.1989	48.9687	42.9346	59.0676		55.761	6.04637
ENSGALG00000001733	ENSGALG00000001733	LRIG2	LRIG2	chr26:3637063-3652281	ENSG00000198799	LRIG2	chr1:113073209-113132260	10.7738	9.72932	6.99762	8.91148	6.21781	9.56255	8.26225	8.39154	4.29879	5.12474	8.32849	10.2416		8.07	2.03157
ENSGALG00000001734	ENSGALG00000001734	-	ENSGALG00000001734	chr18:4168292-4171205				2.83392	1.95445	2.96812	3.05619	2.87925	1.25882	2.65985	2.10629	4.79009	3.53475	1.28877	2.4605		2.64925	0.968555
ENSGALG00000001737	ENSGALG00000001737	RABEP1	RABEP1	chr19:3421661-3461717	ENSG00000029725	RABEP1	chr17:5282265-5385812	21.5987	22.2551	19.9169	20.9472	21.5998	17.8007	22.0386	19.9046	17.0331	20.4572	25.8099	20.5522		20.8262	2.23581
ENSGALG00000001740	ENSGALG00000001740	MGAT5B	MGAT5B	chr18:4204458-4249189	ENSG00000167889	MGAT5B	chr17:76868456-76950393	2.07057	1.48762	2.13225	1.82307	1.2377	1.69559	1.59147	1.44254	2.93239	2.94129	2.3807	3.78768		2.12691	0.761015
ENSGALG00000001741	ENSGALG00000001741	NPTN	NPTN	chr10:2096925-2160818	ENSG00000156642	NPTN	chr15:73560014-73634134	156.092	148.575	141.9	168.642	164.325	134.833	145.767	150.553	117.585	99.039	87.0186	184.743		141.589	28.4099
ENSGALG00000001749	ENSGALG00000001749	ACSBG2	ACSBG2	chr28:1642901-1659177	ENSG00000130377	ACSBG2	chr19:6135247-6193094	9.2109	8.02148	4.86526	9.66953	7.36453	5.8455	9.11567	8.14439	5.2363	12.2579	15.8801	12.9739		9.04879	3.30008
ENSGALG00000001750	ENSGALG00000001750	MAT2B	MAT2B	chr13:6705781-6715330	ENSG00000038274	MAT2B	chr5:163503114-163519336	18.9196	20.6278	18.4719	19.9395	21.7692	18.0742	19.6315	17.611	17.0366	17.6398	17.8851	21.625		19.1026	1.60635
ENSGALG00000001753	ENSGALG00000001753	SFMBT1	SFMBT1	chr12:891386-950945	ENSG00000163935	SFMBT1	chr3:52903572-53046750	0.770756	0.97822	0.379818	1.00384	0.598185	0.682601	0.854141	0.872332	0.652113	0.741138	0.469117	0.455655		0.704826	0.20407
ENSGALG00000001758	ENSGALG00000001758	QSOX2	QSOX2	chr17:8505848-8524950	ENSG00000165661	QSOX2	chr9:136206333-136245841	12.1135	12.7652	11.2478	9.48406	12.1693	13.9793	10.6875	11.2851	4.82941	6.9571	8.87866	6.92487		10.1101	2.74961
ENSGALG00000001762	ENSGALG00000001762	-	ENSGALG00000001762	chr17:8489970-8492171				0.325352	0.167041	0.10147	0.0734633	0.250724	0	0.154412	0	0.257062	0.0734848	0.4506	0.15141		0.167085	0.134365
ENSGALG00000001764	ENSGALG00000001764	HCN4	HCN4	chr10:1953569-2049857	ENSG00000138622	HCN4	chr15:73319859-73369264	0.12253	0.112337	0.300257	0.0691671	0.157374	0.108531	0.0519221	0.177891	0.276604	0.17791	0.206064	0.112008		0.15605	0.0765212
ENSGALG00000001765	ENSGALG00000001765	CAAP1	CAAP1	chrZ:68485991-68502940	ENSG00000120159	CAAP1	chr9:26840685-26892804	18.9742	24.1811	23.2548	22.3614	33.4534	31.8576	24.5077	23.6231	38.3613	28.2408	22.8366	22.5979		26.1875	5.64213
ENSGALG00000001768	ENSGALG00000001768	-	TENM2	chr13:4816281-5306069				0.696034	0.360128	0.444502	0.688379	0.362116	0.46221	0.574696	0.425705	0.49564	0.460158	0.808805	0.698418		0.539733	0.14939
ENSGALG00000001770	ENSGALG00000001770	-	ENSGALG00000001770	chr21:2436673-2437943	ENSG00000131584	ACAP3	chr1:1292376-1309609	2.10871	1.44353	0.730736	1.90456	2.58799	1.68516	2.00159	1.14294	0.802195	0.899637	2.92048	2.67141		1.74158	0.754577
ENSGALG00000001773	ENSGALG00000001773	RFX2	RFX2	chr28:1576434-1603526	ENSG00000087903	RFX2	chr19:5993164-6199572	1.59252	1.35762	1.31953	1.30883	1.33896	1.36782	1.2729	1.30683	1.13081	1.27576	3.66404	1.88943		1.56875	0.68721
ENSGALG00000001774	ENSGALG00000001774	NEO1	NEO1	chr10:1742726-1938673	ENSG00000067141	NEO1	chr15:73051710-73305206	6.42117	6.60912	8.36926	5.03485	5.39228	9.76982	5.7632	8.2043	6.78458	6.11516	6.3498	5.67541		6.70741	1.39612
ENSGALG00000001777	ENSGALG00000001777	MFSD11	MFSD11	chr18:4266171-4280924	ENSG00000092931	MFSD11	chr17:76735865-76781449	6.16137	5.62469	3.32163	5.68411	4.68026	4.86003	5.13821	4.38312	2.24861	2.91081	4.36416	4.71061		4.5073	1.1699
ENSGALG00000001779	ENSGALG00000001779	-	ENSGALG00000001779	chr11:1077256-1088789	ENSG00000196123	KIAA0895L	chr16:67175602-67184040	3.84383	3.95995	4.10119	3.25471	2.72829	3.76304	2.82043	3.54656	3.72967	5.36898	4.55304	3.11865		3.73236	0.740536
ENSGALG00000001780	ENSGALG00000001780	PROC	PROC	chr9:1263546-1272258	ENSG00000115718	PROC	chr2:127418427-127429246	0.73595	0.664734	0.42505	0.461597	0.315077	0.709808	0.485113	1.27424	0.610191	12.0666	24.5755	1.74416		3.67233	7.35452
ENSGALG00000001782	ENSGALG00000001782	PLAA	PLAA	chrZ:68502952-68521959	ENSG00000137055	PLAA	chr9:26904083-26947463	40.2223	50.8552	60.0748	58.888	55.5959	61.7391	64.7999	61.5073	91.4995	70.0975	48.1079	49.4491		59.403	13.0259
ENSGALG00000001788	ENSGALG00000001788	ADPGK	ADPGK	chr10:1649711-1661540	ENSG00000159322	ADPGK	chr15:72751369-72785846	21.5375	22.3304	19.4294	19.3765	19.43	22.931	19.9024	20.1219	15.3498	16.2014	14.3362	16.951		18.9915	2.74146
ENSGALG00000001790	ENSGALG00000001790	-	ENSGALG00000001790	chr18:4281457-4287639	ENSG00000267168	AC005837.2	chr17:76732978-76738522	7.4842	8.33572	8.51171	8.05658	9.25911	5.85067	8.42838	10.6277	12.2074	8.93921	9.6735	9.01972		8.86616	1.57708
ENSGALG00000001791	ENSGALG00000001791	-	LOC415664	chr11:1133507-1136396				2.84689	5.70508	4.38853	4.64191	3.46041	4.43635	4.39107	4.28593	6.36991	6.24794	6.87225	5.54419		4.93254	1.22046
ENSGALG00000001792	ENSGALG00000001792	-	MRPS34	chr14:14347520-14349444	ENSG00000074071	MRPS34	chr16:1771890-1773155	71.081	69.0192	73.9027	77.1131	81.9007	72.0927	76.119	73.9413	88.3267	82.6028	91.2942	86.7893		78.6819	7.33893
ENSGALG00000001793	ENSGALG00000001793	MYL10	MYL10	chr19:3725133-3746093	ENSG00000106436	MYL10	chr7:101613325-101629296	0.262714	0.0501711	0	0	0	0	0.222649	0.0762813	0.205927	0.309061	0.883634	0.0454762		0.171326	0.25145
ENSGALG00000001797	ENSGALG00000001797	GPSM1	GPSM1	chr17:8408804-8458669	ENSG00000160360	GPSM1	chr9:136327476-136359605	2.41633	2.63089	2.75454	2.01307	2.7182	2.52107	1.52246	3.08224	2.6333	2.48414	6.43917	2.90816		2.84363	1.20429
ENSGALG00000001798	ENSGALG00000001798	BBS4	BBS4	chr10:1612982-1647497	ENSG00000140463	BBS4	chr15:72686179-72738476	5.32153	7.64276	9.34653	5.81353	6.78206	8.1414	5.38141	5.92318	9.06514	8.22545	11.2046	5.1235		7.33092	1.92888
ENSGALG00000001800	ENSGALG00000001800	-	ENSGALG00000001800	chr28:1559955-1567028	ENSG00000267157	AC011499.1	chr19:5784005-5785619	67.9892	62.949	49.3767	73.0432	78.8942	56.5128	73.3705	61.15	60.5802	59.1342	39.7853	73.373		63.0132	11.2183
ENSGALG00000001801	ENSGALG00000001801	IFT74	IFT74	chrZ:68522459-68553748	ENSG00000096872	IFT74	chr9:26947039-27062930	15.6603	15.6073	14.2574	21.4433	21.4529	18.8191	20.9891	15.1392	13.6581	12.365	13.6684	17.5697		16.7191	3.25634
ENSGALG00000001802	ENSGALG00000001802	JMJD6	JMJD6	chr18:4287923-4299050	ENSG00000070495	JMJD6	chr17:76712832-76726799	22.3523	24.158	21.6869	20.2272	18.7626	20.3122	19.7452	19.27	20.8231	19.7868	23.9042	23.8994		21.244	1.91992
ENSGALG00000001803	ENSGALG00000001803	IWS1	IWS1	chr9:1281502-1299201	ENSG00000163166	IWS1	chr2:127436207-127526886	80.5432	88.1445	89.0077	84.3317	111.507	61.1023	80.8841	84.5001	97.1254	88.1787	89.3028	80.3815		86.2507	11.7372
ENSGALG00000001805	ENSGALG00000001805	MXRA7	MXRA7	chr18:4301032-4321127	ENSG00000182534	MXRA7	chr17:76672551-76711016	46.1366	26.6702	30.0813	42.7814	40.2885	21.4365	42.5839	34.38	22.764	45.2504	81.5762	62.6671		41.3847	17.1846
ENSGALG00000001806	ENSGALG00000001806	-	ENSGALG00000001806	chr28:1511162-1512296	ENSG00000130383	FUT5	chr19:5865826-5870540	2.67034	1.81698	2.15731	1.74348	0.619826	2.11447	1.64144	1.63481	1.01679	0.83566	0.44558	1.04806		1.47873	0.683403
ENSGALG00000001812	ENSGALG00000001812	ATCAY	ATCAY	chr28:1480941-1488945	ENSG00000167654	ATCAY	chr19:3879864-3928079	0.51054	1.44166	1.80457	0.230556	0.918011	2.95443	0.282686	1.14146	0.941217	0.730307	0.612801	0.277189		0.987119	0.785184
ENSGALG00000001816	ENSGALG00000001816	MAGI3	MAGI3	chr26:3667657-3718886	ENSG00000081026	MAGI3	chr1:113390749-113685923	7.20105	6.54941	2.90171	5.86707	6.8819	4.89851	7.05974	6.67113	2.80463	6.09664	8.52006	4.56977		5.83514	1.7377
ENSGALG00000001817	ENSGALG00000001817	CTCF	CTCF	chr11:1167097-1222463	ENSG00000102974	CTCF	chr16:67562407-67639183	53.875	52.1169	49.5719	56.1112	57.0758	54.5728	53.6574	49.5916	43.0992	44.7768	46.0253	48.5063		50.7484	4.55032
ENSGALG00000001823	ENSGALG00000001823	HIKESHI	HIKESHI	chr1:190562765-190571669	ENSG00000149196	HIKESHI	chr11:86302211-86345931	101.912	116.329	134.054	113.803	130.604	111.658	113.779	118.137	164.148	138.674	125.768	107.794		123.055	16.9727
ENSGALG00000001824	ENSGALG00000001824	-	ENSGALG00000001824	chr11:1224062-1227271				0.87921	0.951482	0.295713	0.564427	0.86353	0.470308	0.531818	0.490556	0.658344	0.953965	0.52527	1.10313		0.690646	0.249921
ENSGALG00000001826	ENSGALG00000001826	WWC1	WWC1	chr13:4736837-4816029	ENSG00000113645	WWC1	chr5:168291651-168472303	38.0763	37.9417	39.8179	31.7209	35.9813	36.1041	39.4625	43.0271	42.2006	40.5969	42.4774	24.5607		37.6639	5.23552
ENSGALG00000001828	ENSGALG00000001828	SH2B2	SH2B2	chr19:4089022-4097513	ENSG00000160999	SH2B2	chr7:102285091-102321711	0.742753	1.0382	2.07085	0.660606	1.14371	1.60056	0.592161	1.06687	1.75718	1.06261	1.41173	0.740877		1.15734	0.466953
ENSGALG00000001833	ENSGALG00000001833	PRKRIP1	PRKRIP1	chr19:4102522-4110937	ENSG00000128563	PRKRIP1	chr7:102363872-102426676	42.6696	51.121	49.9351	50.0114	68.6428	46.3007	47.6159	43.2339	54.7385	46.06	45.3443	47.6187		49.441	6.93654
ENSGALG00000001835	ENSGALG00000001835	SCNN1D	SCNN1D	chr21:2445678-2450130	ENSG00000162572	SCNN1D	chr1:1280436-1292029	0	0	0	0	0	0	0	0	0	0	0	0		0	0
ENSGALG00000001837	ENSGALG00000001837	ORAI2	ORAI2	chr19:4112359-4121641	ENSG00000160991	ORAI2	chr7:102433106-102456821	86.8571	80.9048	76.6894	76.905	57.5502	72.3519	63.5749	62.345	71.862	87.3441	125.309	92.9047		79.5498	17.9634
ENSGALG00000001838	ENSGALG00000001838	XPO7	XPO7	chr22:1366344-1401055	ENSG00000130227	XPO7	chr8:21919671-22006585	84.6927	85.9413	75.6855	81.7091	69.808	84.4467	81.8149	80.2583	72.8275	61.9356	55.558	87.2099		76.824	10.0543
ENSGALG00000001840	ENSGALG00000001840	TEK	TEK	chrZ:68562095-68597536	ENSG00000120156	TEK	chr9:27109141-27230175	0.0694113	0	0.0618501	0.0956324	0.0254697	0.0983697	0.0558352	0.0302306	0.0391715	0.0447918	0.0274645	0.0692183		0.0514538	0.0293288
ENSGALG00000001841	ENSGALG00000001841	ROGDI	ROGDI	chr14:14377043-14389114	ENSG00000067836	ROGDI	chr16:4796968-4802950	18.6044	21.2703	19.4648	19.9943	18.5052	19.0107	19.3379	20.4	21.8002	22.8256	27.5039	22.2029		20.91	2.52457
ENSGALG00000001844	ENSGALG00000001844	ALKBH4	ALKBH4	chr19:4125578-4127076	ENSG00000160993	ALKBH4	chr7:102456238-102464876	15.0158	15.7144	14.8343	16.4228	20.1077	14.9703	14.1214	16.1705	20.0543	14.4043	10.2209	15.6831		15.6433	2.61177
ENSGALG00000001845	ENSGALG00000001845	PHTF1	PHTF1	chr26:3719994-3729665	ENSG00000116793	PHTF1	chr1:113696831-113759489	22.4145	23.9625	25.2489	21.3567	20.0846	28.5179	18.6233	23.5789	19.2489	18.7955	14.4115	24.6026		21.7371	3.77078
ENSGALG00000001848	ENSGALG00000001848	UBE2J2	UBE2J2	chr21:2461049-2466530	ENSG00000160087	UBE2J2	chr1:1253909-1273885	123.896	114.023	102.164	122.422	120.301	101.032	118.4	105.36	99.5292	98.6553	108.028	128.626		111.87	10.6636
ENSGALG00000001849	ENSGALG00000001849	BSN	BSN	chr12:2472586-2517710	ENSG00000164061	BSN	chr3:49554489-49671545	0.378305	0.175931	0.213742	0.229025	0.246463	0.435122	0.25045	0.1783	0.198545	0.160983	0.326512	0.137142		0.24421	0.0913968
ENSGALG00000001850	ENSGALG00000001850	RARS	RARS	chr13:4736837-4816029	ENSG00000113643	RARS	chr5:168486445-168519299	129.642	152.246	149.104	156.809	184.757	143.224	152.962	158.088	225.706	167.946	116.66	160.461		158.134	27.4282
ENSGALG00000001852	ENSGALG00000001852	LRWD1	LRWD1	chr19:4128854-4140535	ENSG00000161036	LRWD1	chr7:102464929-102473168	80.1066	93.7332	86.069	82.3136	90.9064	92.762	76.6542	77.9487	87.9466	77.1276	54.6475	68.7813		80.7497	11.1244
ENSGALG00000001856	ENSGALG00000001856	MOB3B	MOB3B	chrZ:68630254-68662403	ENSG00000120162	MOB3B	chr9:27325209-27529781	4.19841	3.73741	2.63989	4.20477	3.4789	6.04615	3.69588	3.99143	1.96175	2.52359	4.03272	3.2301		3.64508	1.04305
ENSGALG00000001857	ENSGALG00000001857	C1QTNF12	C1QTNF12	chr21:2472219-2486139	ENSG00000184163	C1QTNF12	chr1:1242446-1246722	1.61563	1.16331	0.430143	1.1567	0.556727	0.537513	0.701322	0.680794	0.467018	0.400512	1.14608	1.14614		0.833491	0.394265
ENSGALG00000001859	ENSGALG00000001859	-	ENSGALG00000001859	chr21:2525057-2526092	ENSG00000176022	B3GALT6	chr1:1232265-1235041	8.71155	6.46871	5.50126	5.68977	6.65783	8.03508	6.15049	6.25582	3.98191	3.49617	4.28762	6.78477		6.00175	1.55123
ENSGALG00000001860	ENSGALG00000001860	RSBN1	RSBN1	chr26:3733067-3803416	ENSG00000081019	RSBN1	chr1:113761832-113812476	13.6206	12.5051	10.1166	14.4799	12.7007	11.7976	11.6292	12.7088	10.1511	10.2792	9.43391	14.0806		11.9586	1.67937
ENSGALG00000001862	ENSGALG00000001862	ST6GALNAC1	ST6GALNAC1	chr18:4333889-4345366	ENSG00000070526	ST6GALNAC1	chr17:76624761-76643838	1.08135	1.0641	2.9603	0.610411	1.20367	1.6538	0.698532	3.54102	2.61059	27.4901	99.5255	2.65593		12.0913	28.523
ENSGALG00000001863	ENSGALG00000001863	-	VTG2	chr8:16539917-16602426				0.0224268	0.0143794	0.0262175	0.0379912	0.0360125	0.0626039	0.0399267	0.0113827	0.0369229	0.0316649	0.00775614	0		0.0272737	0.0172683
ENSGALG00000001864	ENSGALG00000001864	C9orf72	C9orf72	chrZ:68714995-68729199	ENSG00000147894	C9orf72	chr9:27546545-27573866	4.12788	4.84968	1.7918	5.20969	3.90399	2.69131	4.16055	2.65541	1.42338	1.7345	1.48524	4.33106		3.19704	1.38504
ENSGALG00000001866	ENSGALG00000001866	MCHR2	MCHR2	chr14:14407360-14411064	ENSG00000128310	GALR3	chr22:37823382-37825495	0.0566797	0.0727507	0.176772	0.0639903	0.181994	0	0.0336252	0.201606	0.111957	0.35205	0.196248	0		0.120639	0.104048
ENSGALG00000001869	ENSGALG00000001869	LINGO2	LINGO2	chrZ:68842897-68844718	ENSG00000174482	LINGO2	chr9:27948078-28670286	0.0185175	0.0950718	0.0577521	0.0627177	0.118917	0.1837	0.065913	0.0376374	0.0487691	0.146384	0.179522	0		0.0845751	0.0606763
ENSGALG00000001872	ENSGALG00000001872	SDF4	SDF4	chr21:2526772-2539565	ENSG00000078808	SDF4	chr1:1216908-1232031	30.9251	30.17	26.0292	32.5365	27.4424	23.5697	31.5517	23.4283	20.8916	24.9262	27.1792	32.6699		27.61	3.95217
ENSGALG00000001876	ENSGALG00000001876	-	RASA4	chr19:4142036-4148992	ENSG00000170667	RASA4B	chr7:102482445-102517781	2.93674	4.01419	6.34394	2.77011	5.53533	6.32172	2.68498	3.81139	8.06924	5.26906	3.15169	2.70673		4.46793	1.79858
ENSGALG00000001882	ENSGALG00000001882	-	TNFRSF18	chr21:2554360-2560669	ENSG00000186891	TNFRSF18	chr1:1203508-1206691	0.0524804	0	0.032735	0.0118499	0	0	0.0373607	0.0106668	0	0.0237067	0.145367	0.0244229		0.0282158	0.0406898
ENSGALG00000001883	ENSGALG00000001883	ST6GALNAC2	ST6GALNAC2	chr18:4348910-4354952	ENSG00000070731	ST6GALNAC2	chr17:76565379-76586956	46.7865	35.6816	21.8734	39.2209	29.2871	22.0128	30.052	27.0513	17.2987	42.7617	128.588	79.6092		43.3519	31.484
ENSGALG00000001889	ENSGALG00000001889	CARD9	CARD9	chr17:8395196-8401638	ENSG00000187796	CARD9	chr9:136361903-136373681	2.50535	2.67977	2.24643	3.25277	2.78876	3.41743	2.40285	3.5009	3.18917	2.78217	2.34213	3.8864		2.91618	0.524211
ENSGALG00000001892	ENSGALG00000001892	CYGB	CYGB	chr18:4382660-4389729	ENSG00000161544	CYGB	chr17:76527356-76551175	15.0791	18.2164	12.5978	15.435	9.23577	21.4472	12.9299	14.1646	16.2497	10.6088	4.79513	7.83593		13.2163	4.61435
ENSGALG00000001894	ENSGALG00000001894	-	ENSGALG00000001894	chr21:2563199-2570115				0	0	0.0469922	0.0340218	0	0.0373686	0	0	0	0.0340317	0	0		0.0127012	0.0190322
ENSGALG00000001895	ENSGALG00000001895	-	PANK3	chr13:4684398-4691245				17.7775	10.9167	9.38119	10.8825	9.55302	15.1374	9.79264	10.3721	4.56761	4.8344	9.62461	11.2145		10.3378	3.63951
ENSGALG00000001900	ENSGALG00000001900	PHF24	PHF24	chrZ:8505879-8508609	ENSG00000122733	PHF24	chr9:34957608-34982544	0	0.0765887	5.62945	0.0336831	0.229915	0.517953	0.0353991	0.424484	8.80046	0.808631	0.371882	0.0347108		1.4136	2.80361
ENSGALG00000001901	ENSGALG00000001901	ARIH1	ARIH1	chr10:1563314-1611686	ENSG00000166233	ARIH1	chr15:72474326-72602985	82.6555	86.8813	104.699	83.0546	92.7547	87.207	87.0154	104.589	120.282	129.151	156.344	90.0078		102.053	22.7096
ENSGALG00000001905	ENSGALG00000001905	DTX2	DTX2	chr19:4156281-4182491	ENSG00000091073	DTX2	chr7:76461676-76505995	11.3736	12.0234	9.73832	11.0688	9.16367	8.68693	16.067	10.5227	13.6775	12.7712	10.9121	14.1546		11.68	2.17684
ENSGALG00000001907	ENSGALG00000001907	WAPL	WAPL	chr6:2236565-2359786	ENSG00000062650	WAPL	chr10:86435256-86521815	28.1121	23.1057	22.9936	26.1262	23.5567	26.6521	23.8993	24.2829	15.78	16.39	20.8339	22.1698		22.8252	3.72772
ENSGALG00000001912	ENSGALG00000001912	-	ENSGALG00000001912	chr23:3621008-3642966	ENSG00000183317	EPHA10	chr1:37713880-37765133	0.0561628	0.0219498	0.043788	0.110966	0	0.042413	0.142037	0.0347592	0.0739572	0.0193123	0.525547	0.238841		0.109144	0.146841
ENSGALG00000001916	ENSGALG00000001916	SLIT3	SLIT3	chr13:4204849-4675881	ENSG00000184347	SLIT3	chr5:168661733-169301129	2.61787	2.13143	3.04649	2.55117	2.11608	3.47239	2.23299	2.63398	3.21577	2.35335	2.45318	2.22746		2.58768	0.44223
ENSGALG00000001917	ENSGALG00000001917	SSC4D	SSC4D	chr19:4192264-4200891	ENSG00000146700	SSC4D	chr7:76389334-76409695	0.0584789	0.10008	0.0303972	0.0880289	0.100145	0.0725165	0.0231284	0	0	0.110068	0	0.0226787		0.0504601	0.0426466
ENSGALG00000001918	ENSGALG00000001918	DNAJB5	DNAJB5	chrZ:8525190-8536632	ENSG00000137094	DNAJB5	chr9:34989641-34998900	0.696577	0.853444	0.592487	0.714914	0.772661	0.667469	0.601079	0.772264	1.00067	0.715137	2.19259	1.14195		0.893437	0.439157
ENSGALG00000001921	ENSGALG00000001921	SDCCAG3	SDCCAG3	chr17:8375201-8377212	ENSG00000165689	SDCCAG3	chr9:136401922-136410609	10.1066	11.2224	11.142	11.1978	13.9466	9.21	10.0951	11.9908	12.3183	11.5727	10.6769	10.2816		11.1467	1.24397
ENSGALG00000001925	ENSGALG00000001925	GNB1L	GNB1L	chr15:943693-984275	ENSG00000185838	GNB1L	chr22:19783224-19854939	33.3134	32.2531	38.1268	32.6898	40.2354	36.5528	29.3519	36.5127	44.4446	41.5055	30.3588	26.3941		35.1449	5.36306
ENSGALG00000001926	ENSGALG00000001926	HSPB1	HSPB1	chr19:4228615-4230508	ENSG00000106211	HSPB1	chr7:76302544-76304295	5.24477	2.52445	8.17866	4.5643	2.87693	6.09726	5.63951	3.71996	8.48925	5.55279	2.79959	2.35178		4.8366	2.09449
ENSGALG00000001932	ENSGALG00000001932	SRRM3	SRRM3	chr19:4233292-4250143	ENSG00000177679	SRRM3	chr7:76201900-76287288	0.134756	0.0918665	0.125173	0.020231	0.0687044	0.0887802	0	0.0910646	0.0352201	0.0604099	0.0740853	0.083283		0.0727978	0.0396478
ENSGALG00000001933	ENSGALG00000001933	CORO2A	CORO2A	chrZ:70482713-70527115	ENSG00000106789	CORO2A	chr9:98120975-98192640	7.07678	4.76762	0.850995	7.89018	2.62275	2.42309	8.33393	3.41705	0.672264	1.61031	6.14395	11.285		4.75783	3.38677
ENSGALG00000001934	ENSGALG00000001934	OPN4	OPN4	chr6:2236565-2359786	ENSG00000122375	OPN4	chr10:86654557-86666848	0	0	0	0	0	0	0	0	0	0	0	0		0	0
ENSGALG00000001935	ENSGALG00000001935	TTLL10	TTLL10	chr21:2571448-2578455	ENSG00000162571	TTLL10	chr1:1173884-1197935	0	0	0	0.0489267	0	0	0	0	0	0	0	0		0.00407722	0.0141239
ENSGALG00000001936	ENSGALG00000001936	MYO7B	MYO7B	chr9:1309263-1343370	ENSG00000169994	MYO7B	chr2:127535802-127637729	0.0117618	0.0301936	0.0733653	0.0132789	0.0226598	0.0437556	0.0418662	0.101602	0.108419	0.0996208	0.0977381	0.0136841		0.0548288	0.0386796
ENSGALG00000001938	ENSGALG00000001938	SLC25A24	SLC25A24	chr8:1190243-1208672	ENSG00000085491	SLC25A24	chr1:108134036-108200849	4.90765	4.55258	3.68733	4.28141	4.26901	4.3983	5.26709	3.71794	1.58627	3.1994	5.46842	5.37231		4.22564	1.09203
ENSGALG00000001939	ENSGALG00000001939	HIPK1	HIPK1	chr26:3733067-3803416	ENSG00000163349	HIPK1	chr1:113929192-113977869	30.6821	20.8992	16.3518	19.3076	14.3635	27.1843	20.8601	22.3495	6.78364	8.36712	14.4502	18.2336		18.3194	6.93064
ENSGALG00000001942	ENSGALG00000001942	SPDL1	SPDL1	chr13:4125932-4144612	ENSG00000040275	SPDL1	chr5:169583634-169604778	28.6884	30.4764	26.7843	32.6594	31.9178	28.2769	30.9522	28.9301	22.7882	25.1476	30.2016	31.1017		28.9937	2.90325
ENSGALG00000001943	ENSGALG00000001943	RHBDF2	RHBDF2	chr18:4406095-4412650	ENSG00000129667	RHBDF2	chr17:76470891-76501790	16.6782	14.7062	13.1129	14.183	12.0075	14.3811	13.3382	14.7034	12.0267	13.2547	14.4609	22.0492		14.5752	2.68026
ENSGALG00000001944	ENSGALG00000001944	TBC1D2	TBC1D2	chrZ:70527242-70548597	ENSG00000095383	TBC1D2	chr9:98198999-98255721	3.70462	2.55088	2.13627	4.88497	2.79415	2.4764	5.40856	2.61287	3.15062	4.00935	3.78126	5.91511		3.61876	1.23658
ENSGALG00000001945	ENSGALG00000001945	-	RFT1	chr12:1156710-1252102	ENSG00000272305	AC096887.1	chr3:52969119-53099453	19.4752	16.492	25.2625	18.1049	17.6664	21.0772	18.1206	19.7032	22.3106	18.9485	17.4171	14.5296		19.0923	2.81631
ENSGALG00000001946	ENSGALG00000001946	RSPO1	RSPO1	chr23:3731880-3744539	ENSG00000169218	RSPO1	chr1:37611350-37634923	0.0793327	0	0	0.0895652	0	0.147564	0	0.0501647	0.0522339	0	0.37276	0.019143		0.0675636	0.106972
ENSGALG00000001947	ENSGALG00000001947	ELP1	IKBKAP	chrZ:70551165-70582389	ENSG00000070061	ELP1	chr9:108867517-108934116	21.3606	26.4359	20.0841	28.5651	23.0008	29.6745	32.7606	25.7533	26.1667	23.6243	20.1518	27.0157		25.3828	3.90674
ENSGALG00000001948	ENSGALG00000001948	-	ENSGALG00000001948	chr28:1350477-1363658	ENSG00000160633	SAFB	chr19:5623035-5668478	46.1911	41.8872	46.3598	48.4065	68.5401	46.2513	49.7361	45.1689	48.2615	44.2636	41.641	47.1845		47.8243	6.969
ENSGALG00000001949	ENSGALG00000001949	MDH2	MDH2	chr19:4260412-4268042	ENSG00000146701	MDH2	chr7:76048051-76067508	446.628	510.634	513.12	502.067	505.987	477.993	515.767	526.067	685.934	688.609	531.784	428.395		527.749	80.6951
ENSGALG00000001950	ENSGALG00000001950	PMPCA	PMPCA	chr17:8369495-8375064	ENSG00000165688	PMPCA	chr9:136410570-136423761	115.716	135.135	111.518	127.202	116.889	115.574	125.215	132.34	130.71	130.241	94.8222	128.385		121.979	11.5081
ENSGALG00000001951	ENSGALG00000001951	-	FAM102B	chr8:1214520-1235188	ENSG00000162636	FAM102B	chr1:108560089-108644900	0.456459	0.512648	0.0889748	0.322083	0.293131	0.176884	0.372341	0.202949	0.262973	0.0966532	0.3556	0.464675		0.300448	0.140616
ENSGALG00000001954	ENSGALG00000001954	APTX	APTX	chrZ:70584678-70593677	ENSG00000137074	APTX	chr9:32972606-33025168	30.5367	34.9774	27.62	42.2554	39.2064	30.8944	43.3878	34.4558	43.3521	36.9909	36.8759	46.4968		37.2541	5.88273
ENSGALG00000001955	ENSGALG00000001955	AANAT	AANAT	chr18:4413957-4417785	ENSG00000129673	AANAT	chr17:76453351-76470117	3.86943	2.03036	2.50467	2.88487	1.56283	2.32369	3.23397	2.12695	2.3394	11.7627	59.1851	8.3241		8.51234	16.2453
ENSGALG00000001956	ENSGALG00000001956	OLFML3	OLFML3	chr26:3733067-3803416	ENSG00000116774	OLFML3	chr1:113979391-114035572	13.1972	11.5709	18.4047	12.0097	12.1312	17.633	9.45372	12.1934	25.2678	17.0455	17.5084	8.21932		14.5529	4.75611
ENSGALG00000001959	ENSGALG00000001959	HENMT1	HENMT1	chr8:1239573-1245232	ENSG00000162639	HENMT1	chr1:108648290-108661526	4.99943	3.62891	4.81206	6.48117	3.69768	4.44655	5.175	4.64276	5.24405	4.41939	4.15441	5.5758		4.7731	0.803125
ENSGALG00000001962	ENSGALG00000001962	PTBP1	PTBP1	chr28:2817696-2846212	ENSG00000011304	PTBP1	chr19:797075-812327	321.42	312.899	263.917	371.086	380.228	285.324	342.288	248.845	315.621	327.939	233.858	248.609		304.336	48.4789
ENSGALG00000001963	ENSGALG00000001963	-	ENSGALG00000001963	chr19:4268215-4277329	ENSG00000127952	STYXL1	chr7:75996338-76048004	3.55846	2.03203	1.92562	2.94586	3.05002	2.17506	4.27866	3.28974	2.71017	2.90596	3.60231	4.62664		3.09171	0.842543
ENSGALG00000001964	ENSGALG00000001964	INPP5E	INPP5E	chr17:8360605-8367535	ENSG00000148384	INPP5E	chr9:136428619-136439823	18.4967	18.6121	16.6699	12.8874	15.0726	17.9814	13.3239	15.4048	9.92494	9.82543	9.08397	12.9275		14.1842	3.41433
ENSGALG00000001965	ENSGALG00000001965	AARS	AARS	chr11:1232731-1245134	ENSG00000090861	AARS	chr16:70252295-70289543	151.681	177.851	215.876	147.548	184.489	170.535	156.554	191.677	322.313	265.499	209.446	173.022		197.208	51.2287
ENSGALG00000001968	ENSGALG00000001968	SYT6	SYT6	chr26:3814650-3824158	ENSG00000134207	SYT6	chr1:114089291-114153919	0.0274823	0.0352747	0.0428558	0.0310271	0	0.0681587	0	0	0.108569	0	0.038062	0		0.0292858	0.0335594
ENSGALG00000001971	ENSGALG00000001971	UBE2O	UBE2O	chr18:4419204-4466719	ENSG00000175931	UBE2O	chr17:76389451-76453206	30.4036	21.9885	16.1215	26.3369	27.5378	24.9956	25.0404	20.9663	12.336	14.1948	20.5195	27.9761		22.3681	5.75668
ENSGALG00000001972	ENSGALG00000001972	-	PRPF38B	chr8:1252113-1256564	ENSG00000134186	PRPF38B	chr1:108692323-108701803	104.738	114.204	112.947	121.941	207.93	57.9665	105.57	81.8233	131.301	109.061	115.028	117.011		114.96	35.0866
ENSGALG00000001973	ENSGALG00000001973	GNL2	GNL2	chr23:3750777-3761907	ENSG00000134697	GNL2	chr1:37566816-37595935	122.238	125.44	113.468	136.911	171.369	127.594	134.143	127.731	139.744	128.944	112.493	119.324		129.95	15.545
ENSGALG00000001975	ENSGALG00000001975	-	ENSGALG00000001975	chr19:4278266-4302064	ENSG00000188735	TMEM120B	chr12:121712752-121783001	23.4794	29.3103	23.4146	22.3246	22.9426	24.1753	22.467	25.07	30.8327	42.1919	35.6306	24.1967		27.1696	6.24241
ENSGALG00000001976	ENSGALG00000001976	TRIM33	TRIM33	chr26:3846982-3869606	ENSG00000197323	TRIM33	chr1:114392777-114511160	30.2006	29.5729	25.188	29.0035	31.9444	33.3668	28.204	30.4047	18.5376	19.1543	22.5324	28.0636		27.1811	4.82466
ENSGALG00000001977	ENSGALG00000001977	-	LDB3	chr6:2373202-2444042	ENSG00000122367	LDB3	chr10:86668449-86736068	0.190229	0.122083	0.0889923	0.0859058	0.0488648	0.0471784	0.112853	0.0386646	0.02505	0.0859309	0.0790378	0.13279		0.0881316	0.0466327
ENSGALG00000001978	ENSGALG00000001978	MED16	MED16	chr28:2853994-2865980	ENSG00000175221	MED16	chr19:867630-893218	25.3637	29.3056	27.573	23.9337	21.5775	28.4784	23.2533	26.6975	24.9434	21.2852	22.7815	30.5629		25.4796	3.06124
ENSGALG00000001981	ENSGALG00000001981	PARP6	PARP6	chr10:1525569-1532750	ENSG00000137817	PARP6	chr15:72241181-72272999	13.462	15.6157	13.5427	14.1066	14.0111	16.5736	14.1597	18.6935	19.9687	16.2732	18.8587	19.1951		16.205	2.42787
ENSGALG00000001983	ENSGALG00000001983	FNDC7	FNDC7	chr8:1260010-1269939	ENSG00000143107	FNDC7	chr1:108712657-108742740	1.8873	2.10646	2.75111	1.66753	1.80921	2.66256	2.12569	2.59903	3.00753	2.27035	1.36374	1.35245		2.13358	0.543305
ENSGALG00000001985	ENSGALG00000001985	PIGQ	PIGQ	chr14:13557300-13587457	ENSG00000007541	PIGQ	chr16:566995-584136	5.85767	5.63421	5.26545	6.31487	4.69507	5.93482	6.07918	5.93804	6.24435	6.36645	6.44539	5.84142		5.88474	0.50164
ENSGALG00000001986	ENSGALG00000001986	-	VCP	chrZ:8540991-8562186	ENSG00000165280	VCP	chr9:35056064-35073249	250.454	237.449	245.135	278.221	245.829	277.177	285.227	244.8	348.958	317.984	249.626	265.936		270.566	33.8375
ENSGALG00000001988	ENSGALG00000001988	TXNRD2	TXNRD2	chr15:1006747-1038156	ENSG00000184470	TXNRD2	chr22:19875517-19941992	4.39509	2.95782	2.74145	4.80099	3.43765	3.8311	4.59462	3.50083	2.07145	2.28023	2.27778	4.26118		3.42918	0.963726
ENSGALG00000001992	ENSGALG00000001992	PKM	PKM	chr10:1506430-1523686	ENSG00000067225	PKM	chr15:72199029-72231822	1658.35	1867.96	2062.67	1556.24	1665.34	1858.78	1602.29	1805.85	2730.27	2224.43	1661.7	1562.06		1854.66	343.675
ENSGALG00000001994	ENSGALG00000001994	-	ENSGALG00000001994	chr14:13543188-13546728	ENSG00000161992	PRR35	chr16:560422-565528	0.0482234	0.103161	0.325864	0.0362956	0.123873	0.159465	0.0381447	0.016336	0.148172	0.0726124	0.133575	0.074806		0.106711	0.0836593
ENSGALG00000001995	ENSGALG00000001995	LIMS2	LIMS2	chr9:1360122-1375264	ENSG00000072163	LIMS2	chr2:127638381-127681786	28.8949	23.2149	16.9679	20.6248	19.3972	28.0239	19.4735	20.119	7.71539	8.01398	6.65291	16.7662		17.9887	7.37756
ENSGALG00000001996	ENSGALG00000001996	DNALI1	DNALI1	chr23:3762542-3766166	ENSG00000163879	DNALI1	chr1:37556919-37566857	3.8951	3.49104	3.61298	4.47331	4.05395	3.3311	3.34662	4.50445	4.51017	4.01957	4.79	3.82848		3.98806	0.494334
ENSGALG00000001998	ENSGALG00000001998	R3HDM4	R3HDM4	chr28:2867618-2872619	ENSG00000198858	R3HDM4	chr19:896503-913245	12.9165	14.0435	15.1327	11.968	12.3679	11.0562	11.7352	11.6377	19.8736	17.6414	27.2103	15.1491		15.061	4.65842
ENSGALG00000002000	ENSGALG00000002000	GRAMD2A	GRAMD2	chr10:1499238-1505771	ENSG00000175318	GRAMD2A	chr15:72159807-72197785	38.0622	29.7674	26.5294	34.3679	32.6436	30.4954	32.3555	31.8996	30.5396	38.7508	98.9827	64.2674		40.7218	20.7645
ENSGALG00000002001	ENSGALG00000002001	STXBP3	STXBP3	chr8:1270640-1295450	ENSG00000116266	STXBP3	chr1:108746674-108809526	35.4833	37.4194	35.079	37.5559	33.3529	37.9015	40.7384	36.1608	31.0107	28.6045	21.8896	20.0718		32.939	6.45693
ENSGALG00000002002	ENSGALG00000002002	BCAS2	BCAS2	chr26:3869907-3872919	ENSG00000116752	BCAS2	chr1:114567557-114581639	149.555	168.14	188.823	154.272	201.295	162.011	156.923	189.223	261.385	210.173	186.181	167.777		182.98	31.3586
ENSGALG00000002003	ENSGALG00000002003	BMPR1A	BMPR1A	chr6:2497709-2573153	ENSG00000107779	BMPR1A	chr10:86756601-86932838	11.7325	8.4051	7.79158	9.14498	8.1039	14.5242	10.0358	8.81816	2.87438	4.12126	6.99088	7.57888		8.34347	3.07389
ENSGALG00000002006	ENSGALG00000002006	PDILT	PDILT	chr14:14424333-14476592	ENSG00000169340	PDILT	chr16:20359170-20404737	0.579133	0.51462	0.208407	0.578388	0.171651	0.359075	0.977853	0.905467	0.381312	4.40207	7.71227	1.58079		1.53092	2.26213
ENSGALG00000002008	ENSGALG00000002008	RNF157	RNF157	chr18:4517731-4531542	ENSG00000141576	RNF157	chr17:76142453-76240373	5.76209	3.69191	4.20077	6.06138	2.98285	3.27544	6.91655	3.9219	4.55713	3.70331	5.60374	13.1914		5.32237	2.76388
ENSGALG00000002009	ENSGALG00000002009	-	FANCG	chrZ:8563609-8574764	ENSG00000221829	FANCG	chr9:35073835-35080016	8.25144	7.33497	9.03898	9.76227	9.3717	8.59163	9.79033	7.83125	11.3148	8.24028	7.10232	9.94906		8.88159	1.224
ENSGALG00000002010	ENSGALG00000002010	SNIP1	SNIP1	chr23:3766306-3768740	ENSG00000163877	SNIP1	chr1:37534449-37554344	102.279	110.317	118.422	106.378	138.754	112.538	104.513	117.905	138.236	115.21	100.044	107.914		114.376	12.6768
ENSGALG00000002012	ENSGALG00000002012	-	ENSGALG00000002012	chr6:2582107-2586354	ENSG00000173269	MMRN2	chr10:86935540-86969481	0.224135	0.19169	0.807409	0.333774	0.0960912	0.370235	0.203895	0.379849	1.57372	0.843719	0.517655	0.260942		0.483593	0.415674
ENSGALG00000002013	ENSGALG00000002013	MEAF6	MEAF6	chr23:3770907-3776895	ENSG00000163875	MEAF6	chr1:37492575-37514774	123.876	131.833	117.886	134.192	135.427	120.576	127.295	123.941	130.509	127.428	145.522	161.822		131.692	12.0362
ENSGALG00000002014	ENSGALG00000002014	SMU1	SMU1	chrZ:70606360-70617581	ENSG00000122692	SMU1	chr9:33041764-33076659	98.1884	104.828	96.59	124.29	94.0118	118.749	130.278	104.382	94.1819	88.2416	81.918	108.248		103.659	14.6412
ENSGALG00000002015	ENSGALG00000002015	SNCG	SNCG	chr6:2607717-2614857	ENSG00000173267	SNCG	chr10:86958618-86963260	0.849188	0.458934	1.04544	1.21101	0.803653	0.554227	0.954531	0.545054	0.765113	0.605683	0.990394	3.01591		0.983261	0.67955
ENSGALG00000002016	ENSGALG00000002016	PRKCD	PRKCD	chr12:1327661-1390974	ENSG00000163932	PRKCD	chr3:53156009-53192717	16.1382	15.3883	13.6632	17.5433	13.8108	12.8216	17.879	15.0697	14.3535	20.2168	38.4226	24.0949		18.2835	7.09512
ENSGALG00000002018	ENSGALG00000002018	CAPN15	CAPN15	chr14:13496261-13507337	ENSG00000103326	CAPN15	chr16:527717-554636	20.2457	21.1688	13.9823	16.1968	17.394	17.9968	17.6382	17.438	14.2334	13.9772	11.8618	19.9289		16.8385	2.8742
ENSGALG00000002021	ENSGALG00000002021	ZC3H12A	ZC3H12A	chr23:3785582-3791308	ENSG00000163874	ZC3H12A	chr1:37474552-37484379	5.96752	3.04833	3.12534	5.54756	3.22441	3.7262	5.31484	3.25371	1.86469	3.11466	4.41764	6.54827		4.0961	1.43969
ENSGALG00000002022	ENSGALG00000002022	B4GALT1	B4GALT1	chrZ:70633212-70650559	ENSG00000086062	B4GALT1	chr9:33104082-33167356	19.6979	24.6187	28.8335	21.3945	26.3336	29.2403	26.6129	29.0632	34.8567	29.487	24.5926	18.8523		26.1319	4.61908
ENSGALG00000002023	ENSGALG00000002023	-	ENSGALG00000002023	chrZ:8574915-8591263	ENSG00000165282	PIGO	chr9:35088688-35096601	3.63662	2.93524	2.12225	3.2073	2.3115	2.77122	3.70159	2.70948	1.78724	2.01984	2.18355	3.14509		2.71091	0.635479
ENSGALG00000002024	ENSGALG00000002024	COMT	COMT	chr15:1049964-1057055	ENSG00000093010	COMT	chr22:19941607-19969975	9.50399	8.6192	10.5002	12.4698	9.21389	9.28269	10.3839	8.22285	9.85754	9.77984	12.3241	8.98665		9.92872	1.32723
ENSGALG00000002028	ENSGALG00000002028	GPRC5B	GPRC5B	chr14:14648508-14704065	ENSG00000167191	GPRC5B	chr16:19856691-19886167	0.401854	0.0396767	0.530242	0.174495	0.158809	0.421653	0.110031	0.0942442	0.162824	0.384001	3.25369	0.28771		0.501602	0.880219
ENSGALG00000002029	ENSGALG00000002029	TMEM259	TMEM259	chr28:2916686-2926075	ENSG00000182087	TMEM259	chr19:1009648-1021179	50.7625	48.6186	40.4378	49.3316	38.7327	49.8121	47.873	48.141	36.4009	39.1307	43.1674	57.0161		45.7854	6.1435
ENSGALG00000002033	ENSGALG00000002033	NDUFB6	NDUFB6	chr14:13454269-13456392	ENSG00000165264	NDUFB6	chr9:32552999-32573184	154.339	153.5	199.397	129.565	155.26	152.361	154.58	175.864	287.146	250.539	206.349	168.126		182.252	46.2703
ENSGALG00000002038	ENSGALG00000002038	DENND2C	DENND2C	chr26:3872934-3887414	ENSG00000175984	DENND2C	chr1:114582848-114670422	1.86311	2.57753	2.13984	1.47365	2.0347	2.08899	1.52225	1.84806	2.23304	2.23002	2.99751	1.31094		2.02664	0.474616
ENSGALG00000002042	ENSGALG00000002042	-	ENSGALG00000002042	chr14:14704143-14714295	ENSG00000103550	KNOP1	chr16:19701934-19718235	110.908	137.286	161.443	140.824	220.803	88.9534	136.423	127.153	190.975	160.153	123.457	104.25		141.886	37.1001
ENSGALG00000002043	ENSGALG00000002043	WDR33	WDR33	chr9:1386699-1447668	ENSG00000136709	WDR33	chr2:127701022-127811187	59.9207	54.4618	50.3781	55.4666	54.4179	57.2772	57.4589	56.8137	42.2814	43.2008	44.1852	55.3725		52.6029	6.10568
ENSGALG00000002044	ENSGALG00000002044	-	EEF2KMT	chr14:13449797-13454228	ENSG00000145002	FAM86B2	chr8:12425614-12436343	9.11514	10.1209	13.0153	8.08388	11.9047	13.7545	8.10481	11.1607	17.3829	13.3448	12.1374	8.84161		11.4139	2.76077
ENSGALG00000002046	ENSGALG00000002046	-	ENSGALG00000002046	chr6:2706649-2717766	ENSG00000277758	FO681492.1	chr10:47750864-47763592	3.45899	2.7046	2.1718	3.9064	2.01472	2.23388	3.00996	2.23197	3.25283	3.11749	8.74399	4.61968		3.45553	1.83792
ENSGALG00000002048	ENSGALG00000002048	-	GPRIN2	chr6:2740218-2743202	ENSG00000204175	GPRIN2	chr10:46549044-46555530	0.290933	0.51173	0.268847	0.352788	0.26295	0.267237	0.115064	0.284715	0.21284	0.279879	0.582012	0.263262		0.307688	0.12567
ENSGALG00000002050	ENSGALG00000002050	EXOC7	EXOC7	chr18:4549301-4569621	ENSG00000182473	EXOC7	chr17:76081017-76121576	33.5116	42.1209	41.4479	37.7223	44.8532	39.5232	37.1222	43.7009	56.141	57.9161	50.8138	39.7167		43.7158	7.58282
ENSGALG00000002053	ENSGALG00000002053	-	POR	chr19:4278266-4302064	ENSG00000127948	POR	chr7:75899200-75986855	46.7315	43.3451	34.3801	44.7034	35.2384	33.98	42.5248	32.2047	39.5069	44.6695	39.8514	37.551		39.5572	4.88017
ENSGALG00000002055	ENSGALG00000002055	hairy1	HES4	chr21:2797269-2799502				37.4156	33.9052	22.8439	32.7638	23.2038	12.3082	40.6234	43.4542	31.755	83.4386	141.767	69.2777		47.7297	35.552
ENSGALG00000002056	ENSGALG00000002056	TANGO2	TANGO2	chr15:1269477-1286149	ENSG00000183597	TANGO2	chr22:20017014-20065926	25.6536	23.8035	24.019	29.4874	22.8594	21.7965	24.5968	20.4251	20.9921	20.7384	22.2305	26.0695		23.556	2.64422
ENSGALG00000002057	ENSGALG00000002057	POLR2D	POLR2D	chr9:1448565-1452013	ENSG00000144231	POLR2D	chr2:127843551-127858157	134.341	145.784	151.804	149.348	154.767	139.232	146.506	147.566	189.222	162.039	159.336	160.883		153.402	14.0566
ENSGALG00000002060	ENSGALG00000002060	TAF15	TAF15	chr19:4320668-4338805	ENSG00000270647	TAF15	chr17:35713791-35864615	146.571	162.323	218.242	155.243	254.636	193.998	156.26	156.942	259.51	209.353	157.215	136.169		183.872	42.4381
ENSGALG00000002062	ENSGALG00000002062	SRP68	SRP68	chr18:4578837-4592330	ENSG00000167881	SRP68	chr17:76038775-76072653	112.933	106.465	89.766	114.021	116.033	99.1694	111.268	103.798	87.2019	96.3395	92.4321	121.353		104.232	11.2211
ENSGALG00000002064	ENSGALG00000002064	-	ENSGALG00000002064	chrZ:8592156-8597776	ENSG00000165283	STOML2	chr9:35099776-35103195	260.616	265.323	272.193	317.326	299.139	280.549	313.564	293.876	413.953	344.574	281.036	323.941		305.507	42.6066
ENSGALG00000002066	ENSGALG00000002066	NCOA4	NCOA4	chr6:2748141-2756918	ENSG00000266412	NCOA4	chr10:46005088-46030714	118.957	116.761	104.206	124.803	109.953	111.199	123.949	114.659	95.7862	103.421	96.8159	116.131		111.387	9.67662
ENSGALG00000002067	ENSGALG00000002067	-	ENSGALG00000002067	chr14:13439928-13447843	ENSG00000251287	ALG1L2	chr3:130081831-130113227	10.258	10.1541	13.1177	13.4864	12.3283	14.9113	12.4839	12.81	18.4738	16.0515	13.2208	9.388		13.057	2.56914
ENSGALG00000002069	ENSGALG00000002069	-	ENSGALG00000002069	chrZ:8598950-8607001				6.46335	4.34373	4.14481	5.24728	4.27192	4.23256	4.75635	3.48351	4.18865	2.78843	2.67539	4.79905		4.28292	1.02982
ENSGALG00000002070	ENSGALG00000002070	SAP130	SAP130	chr9:1471115-1490604	ENSG00000136715	SAP130	chr2:127941217-128028120	45.9633	50.3385	57.0328	40.9655	47.229	58.8155	41.9262	55.3681	58.324	49.6159	50.1502	40.2897		49.6682	6.66957
ENSGALG00000002080	ENSGALG00000002080	DOCK2	DOCK2	chr13:3962514-4122445	ENSG00000134516	DOCK2	chr5:169637247-170083382	0.248567	0.13777	0.202616	0.216849	0.246695	0.189144	0.187679	0.229646	0.0818306	0.140355	0.133008	0.151168		0.180444	0.0519228
ENSGALG00000002081	ENSGALG00000002081	MMP28	MMP28	chr19:4342090-4350741	ENSG00000271447	MMP28	chr17:35756249-35795707	2.56985	1.72354	2.85212	1.33304	1.57598	1.77998	2.11516	3.48221	3.68895	4.28788	1.31464	1.10435		2.31898	1.05091
ENSGALG00000002082	ENSGALG00000002082	AMPD1	AMPD1	chr26:3892414-3899100	ENSG00000116748	AMPD1	chr1:114673090-114695618	0.118316	0.0759319	0.0691882	0.0500914	0.227943	0.0366794	0.0877389	0.0751507	0.0194754	0.08351	0.266278	0.0688263		0.0982608	0.0743711
ENSGALG00000002083	ENSGALG00000002083	-	ENSGALG00000002083	chr20:2149946-2153763				1.04833	0.840955	0.572146	1.47944	0.976164	0.552476	0.839585	0.958842	0.621202	0.976705	2.64973	2.68327		1.18324	0.736389
ENSGALG00000002085	ENSGALG00000002085	FZR1	FZR1	chr28:1059695-1073878	ENSG00000105325	FZR1	chr19:3506273-3538330	58.6295	57.9559	50.2915	52.6659	54.9478	46.7557	49.4284	49.2829	48.1064	38.9997	42.2023	58.6254		50.6576	6.29147
ENSGALG00000002086	ENSGALG00000002086	RASL10B	RASL10B	chr19:4359580-4361499	ENSG00000270885	RASL10B	chr17:35731649-35743521	18.2821	9.78497	13.6491	12.9101	5.62093	14.8803	9.96645	7.6757	12.8274	10.1238	3.12834	5.17376		10.3352	4.43123
ENSGALG00000002087	ENSGALG00000002087	NCBP1	NCBP1	chrZ:70739405-70771390	ENSG00000136937	NCBP1	chr9:97633626-97673748	75.086	103.25	83.6189	96.6955	96.024	78.3695	100.153	91.362	87.3661	78.3187	59.3087	90.6331		86.6821	12.4816
ENSGALG00000002088	ENSGALG00000002088	-	GALR2	chr18:4574939-4576977	ENSG00000128310	GALR3	chr22:37823382-37825495	0.519785	0.58377	0.455934	0.550152	0.333798	0.443133	0.192726	0.627286	0.256677	0.587	0.67489	0.45355		0.473225	0.149014
ENSGALG00000002089	ENSGALG00000002089	-	ENSGALG00000002089	chr6:2759694-2834658	ENSG00000204152	TIMM23B	chr10:49942033-49974850	219.705	212.53	228.375	214.448	232.195	212.399	230.072	280.631	308.388	262.657	216.297	257.563		239.605	31.0211
ENSGALG00000002090	ENSGALG00000002090	GPSM2	GPSM2	chr8:1308936-1344472	ENSG00000121957	GPSM2	chr1:108875350-108934545	25.6364	29.2647	32.3697	24.7182	28.8616	31.7771	23.8793	27.6435	25.7121	20.2771	16.6217	22.7479		25.7924	4.59857
ENSGALG00000002091	ENSGALG00000002091	ZDHHC1	ZDHHC1	chr11:1263534-1277515	ENSG00000159714	ZDHHC1	chr16:67394419-67416833	1.98684	1.77654	2.19316	1.71384	1.49097	2.71292	1.61574	2.10991	1.52865	1.36139	1.17488	1.48043		1.76211	0.426194
ENSGALG00000002093	ENSGALG00000002093	NR2E3	NR2E3	chr10:1323000-1326680	ENSG00000278570	NR2E3	chr15:71792638-71818259	0.329911	0.344056	0.707383	0.4423	0.635591	0.51138	0.342509	0.440051	0.515896	0.908144	4.31212	0.62372		0.842755	1.10582
ENSGALG00000002094	ENSGALG00000002094	TRMT2A	TRMT2A	chr15:1308496-1323220	ENSG00000099899	TRMT2A	chr22:20111866-20117392	20.0471	19.665	21.5204	24.0095	22.342	21.8015	22.1585	21.6204	26.6327	24.7683	22.7213	23.1107		22.5331	1.93833
ENSGALG00000002095	ENSGALG00000002095	CHMP4B	CHMP4B	chr20:2196583-2218131	ENSG00000101421	CHMP4B	chr20:33811304-33854366	118.724	120.224	106.889	127.078	137.272	88.052	122.618	105.539	110.516	120.296	147.295	128.874		119.448	15.5762
ENSGALG00000002097	ENSGALG00000002097	-	LOC415324	chr10:1317806-1319927				3.62083	2.73381	2.65708	3.51074	3.17327	2.21858	2.62821	2.68404	2.58035	1.97236	0.766955	1.83371		2.53166	0.778122
ENSGALG00000002098	ENSGALG00000002098	GRIK3	GRIK3	chr23:3867935-3937207	ENSG00000163873	GRIK3	chr1:36795527-37034129	1.78951	1.93661	1.13081	1.9411	1.11164	1.49389	1.74856	1.62844	0.970322	0.56797	0.113391	1.33355		1.31382	0.565534
ENSGALG00000002099	ENSGALG00000002099	PFKFB4	PFKFB4	chr12:1394465-1434613	ENSG00000114268	PFKFB4	chr3:48517684-48562015	18.4554	17.5863	18.0608	18.0536	22.7479	20.212	18.9021	23.0511	18.9113	21.7599	26.2043	16.31		20.0212	2.86448
ENSGALG00000002102	ENSGALG00000002102	-	ENSGALG00000002102	chr10:1312986-1314180				0	0.123853	0	0	0	0	0	0.0980629	0	0	0	0		0.018493	0.0435389
ENSGALG00000002103	ENSGALG00000002103	TPPP3	TPPP3	chr11:1281968-1283975	ENSG00000159713	TPPP3	chr16:67389809-67393535	1.67252	2.5761	10.7802	1.38472	3.36542	7.32815	1.05837	4.07936	16.7386	6.79968	3.93785	0.518897		5.01999	4.76866
ENSGALG00000002105	ENSGALG00000002105	FOXI1	FOXI1	chr13:3949131-3951294	ENSG00000168269	FOXI1	chr5:170105897-170109725	0.0323813	0.0831254	0	0.109674	0.0831791	0	0.0384204	0	0	0.109706	0.134541	0.11302		0.0586706	0.0522102
ENSGALG00000002106	ENSGALG00000002106	CLCC1	CLCC1	chr8:1308936-1344472	ENSG00000121940	CLCC1	chr1:108929508-108963457	20.1414	20.3316	21.6251	16.811	18.3292	20.9166	20.2562	22.7431	19.4177	21.8207	25.6003	17.0663		20.4216	2.44305
ENSGALG00000002107	ENSGALG00000002107	-	RANBP1	chr15:1308496-1323220				603.538	663.898	636.55	697.799	748.089	728.77	699.359	663.654	658.703	570.64	415.21	572.246		638.205	90.0215
ENSGALG00000002108	ENSGALG00000002108	EVPL	EVPL	chr18:4597351-4613120	ENSG00000167880	EVPL	chr17:76004502-76027452	9.79953	6.41993	3.2598	9.20423	7.87785	5.45632	8.48744	6.92774	3.47787	12.2932	9.51874	9.69861		7.70177	2.70577
ENSGALG00000002110	ENSGALG00000002110	TSTD2	TSTD2	chrZ:70771453-70785848	ENSG00000136925	TSTD2	chr9:97600080-97633575	12.0114	14.5234	14.4777	14.2594	15.4768	19.9075	14.6646	13.8383	14.8747	10.3318	9.10791	13.7269		13.9334	2.70094
ENSGALG00000002111	ENSGALG00000002111	-	ENSGALG00000002111	chr14:13364534-13374948				0.626746	0.266787	0.341329	0.447932	0.572404	0.49701	0.647368	0.448887	0.291775	0.385018	0.323851	0.181366		0.419206	0.147317
ENSGALG00000002112	ENSGALG00000002112	CSF3R	CSF3R	chr23:4028837-4040176	ENSG00000119535	CSF3R	chr1:36466043-36483278	0.182809	0.111627	0.0938319	0.12789	0.0548336	0.0739073	0.0511547	0.214543	0.177916	0.125137	0.0912047	0.20537		0.125852	0.0571269
ENSGALG00000002113	ENSGALG00000002113	LCP2	LCP2	chr13:3848536-3877852	ENSG00000043462	LCP2	chr5:170246237-170298227	0	0	0	0	0	0	0	0	0	0	0	0		0	0
ENSGALG00000002116	ENSGALG00000002116	TEN1	TEN1	chr18:4622400-4640882	ENSG00000257949	TEN1	chr17:75979220-76000586	0	0	0	0	0	0	0	0	0	0	0	0		0	0
ENSGALG00000002117	ENSGALG00000002117	PARG	PARG	chr6:2759694-2834658	ENSG00000227345	PARG	chr10:49818279-49970203	26.8351	23.9877	20.467	23.2008	21.3392	28.669	24.7294	20.8894	11.7503	12.8744	17.9463	19.826		21.0429	5.07413
ENSGALG00000002118	ENSGALG00000002118	KCNMB1	KCNMB1	chr13:3783481-3790486	ENSG00000145936	KCNMB1	chr5:170374671-170389677	0	0	0	0	0	0	0	0	0	0	0	0		0	0
ENSGALG00000002119	ENSGALG00000002119	C16orf62	C16orf62	chr14:14717930-14809857	ENSG00000103544	C16orf62	chr16:19555240-19706793	29.567	31.5165	28.4901	30.4476	28.1212	32.9003	28.0312	31.2661	21.2041	24.125	25.1667	27.0982		28.1612	3.37743
ENSGALG00000002121	ENSGALG00000002121	PLEKHN1	PLEKHN1	chr21:2848493-2859631	ENSG00000187583	PLEKHN1	chr1:966497-975865	5.80674	3.57181	0.867891	6.70232	2.28744	1.05824	5.76709	1.90422	1.22149	4.29492	3.57142	4.6621		3.47631	2.0181
ENSGALG00000002123	ENSGALG00000002123	OSCP1	OSCP1	chr23:4040737-4050162	ENSG00000116885	OSCP1	chr1:36415827-36450451	2.03659	2.04211	5.36799	2.07255	3.10998	3.64232	1.85142	3.61584	6.42555	4.31909	1.77973	2.38497		3.22068	1.51339
ENSGALG00000002124	ENSGALG00000002124	ZDHHC8	ZDHHC8	chr15:1325921-1408363	ENSG00000099904	ZDHHC8	chr22:20129456-20148007	1.2915	1.3461	1.05998	0.877043	0.848092	1.50519	1.0139	1.14475	0.511489	0.668941	1.27763	1.26532		1.06749	0.296029
ENSGALG00000002125	ENSGALG00000002125	TMOD1	TMOD1	chrZ:70791616-70807645	ENSG00000136842	TMOD1	chr9:97501180-97601748	57.8269	83.535	99.1814	76.7363	91.0372	128.655	65.9094	105.82	103.85	58.0132	53.8147	69.6812		82.8384	23.3253
ENSGALG00000002127	ENSGALG00000002127	LSM10	LSM10	chr23:4050243-4051268	ENSG00000181817	LSM10	chr1:36391238-36397892	18.3512	17.818	14.15	15.8253	18.1774	11.5041	15.8281	20.9896	22.9172	15.0652	20.7265	22.8472		17.85	3.55531
ENSGALG00000002129	ENSGALG00000002129	WDR47	WDR47	chr8:1344473-1361990	ENSG00000085433	WDR47	chr1:108970214-109042113	17.0572	16.1439	14.1271	15.3606	16.1372	17.1366	17.1492	16.1067	10.6638	12.1006	16.347	17.0487		15.4482	2.10939
ENSGALG00000002131	ENSGALG00000002131	NPRL2	NPRL2	chr12:1462487-1473928	ENSG00000114388	NPRL2	chr3:50347330-50351091	17.9184	21.0063	22.1071	17.5719	22.8288	20.7138	16.6707	20.2234	27.9708	21.4128	21.1539	19.704		20.7735	2.94026
ENSGALG00000002132	ENSGALG00000002132	KCNIP1	KCNIP1	chr13:3521777-3558785	ENSG00000182132	KCNIP1	chr5:170353487-170736632	3.84368	4.75317	8.81434	5.27788	4.63596	5.86642	4.25097	4.02234	9.03145	6.01484	8.40801	5.27107		5.84918	1.87669
ENSGALG00000002134	ENSGALG00000002134	-	ENSGALG00000002134	chr14:14817492-14824360	ENSG00000066654	THUMPD1	chr16:20702816-20742084	39.9089	42.6118	45.2694	43.7061	52.9401	44.1418	44.0381	40.6493	44.678	38.2481	35.9647	38.7008		42.5714	4.40287
ENSGALG00000002137	ENSGALG00000002137	PGAM5	PGAM5	chr15:1422016-1426476	ENSG00000247077	PGAM5	chr12:132710819-132722734	52.2786	51.6927	42.7395	44.8032	43.173	57.0193	47.9458	55.6612	34.9581	36.0168	30.9944	46.9081		45.3492	8.27335
ENSGALG00000002138	ENSGALG00000002138	HYAL2	HYAL2	chr12:1447838-1450278	ENSG00000068001	HYAL2	chr3:50317790-50322906	35.8138	37.4645	37.9398	31.5611	32.9031	33.3651	36.1169	36.7517	41.8293	45.3499	29.8981	39.2259		36.5183	4.35448
ENSGALG00000002139	ENSGALG00000002139	CSDE1	CSDE1	chr26:3912973-3930246	ENSG00000009307	CSDE1	chr1:114716913-114758676	429.893	412.252	439.457	432.471	446.624	446.262	439.125	430.916	346.519	349.817	362.662	359.056		407.921	40.622
ENSGALG00000002141	ENSGALG00000002141	UGGT1	UGGT1	chr9:1491086-1528028	ENSG00000136731	UGGT1	chr2:128091200-128195677	19.6376	22.5735	19.8723	16.509	15.7389	23.5166	17.9433	20.723	11.9111	12.7211	14.1627	13.1421		17.3709	3.94055
ENSGALG00000002142	ENSGALG00000002142	DGKQ	DGKQ	chrZ:70866491-70947773	ENSG00000145214	DGKQ	chr4:958887-986895	2.62473	1.59582	1.86698	2.33942	2.0552	1.9129	2.26738	1.6028	1.15211	1.46907	7.637	3.80371		2.52726	1.74825
ENSGALG00000002143	ENSGALG00000002143	ANKLE2	ANKLE2	chr15:1431680-1447736	ENSG00000176915	ANKLE2	chr12:132725503-132761888	21.3251	18.7975	16.8248	17.7104	17.0295	24.4001	18.3914	18.4725	10.0834	12.5107	9.59052	13.1527		16.5241	4.43454
ENSGALG00000002144	ENSGALG00000002144	THRAP3	THRAP3	chr23:4072416-4093864	ENSG00000054118	THRAP3	chr1:36224416-36305357	258.022	270.854	253.948	278.693	379.756	283.809	294.569	280.594	293.872	268.956	231.393	266.974		280.12	36.0202
ENSGALG00000002145	ENSGALG00000002145	CAMSAP2	CAMSAP2	chr8:1371787-1431564	ENSG00000118200	CAMSAP2	chr1:200739558-200860704	9.37179	7.43009	4.52781	8.01479	6.26232	8.03204	8.30436	6.99622	2.20005	2.43405	3.6301	6.27293		6.12305	2.38949
ENSGALG00000002147	ENSGALG00000002147	SIKE1	SIKE1	chr26:3930829-3935439	ENSG00000052723	SIKE1	chr1:114769479-114780685	96.4591	101.545	107.158	103.31	109.173	108.239	104.375	103.076	112.935	96.6555	114.448	95.532		104.409	6.26464
ENSGALG00000002150	ENSGALG00000002150	-	CPEB1	chr10:1264585-1290224	ENSG00000260836	AC245033.1	chr15:82540032-82555932	5.15227	4.46797	6.27481	4.4828	3.95131	3.07572	3.37234	4.98726	5.22871	4.12345	11.8093	6.73739		5.30528	2.31081
ENSGALG00000002151	ENSGALG00000002151	PEX12	PEX12	chr19:4430042-4432953	ENSG00000108733	PEX12	chr17:35574795-35578863	30.8632	21.9596	29.9934	32.9178	27.2363	30.2936	28.9993	28.3504	34.2644	33.8454	33.6921	35.4094		30.6521	3.76728
ENSGALG00000002152	ENSGALG00000002152	GABRP	GABRP	chr13:3488059-3498167	ENSG00000094755	GABRP	chr5:170763350-170814047	0.55426	0.237138	0.411576	0.506559	0.372887	0.687307	0.281841	0.858325	0.72987	0.566319	0	0.18424		0.449194	0.249199
ENSGALG00000002155	ENSGALG00000002155	HS6ST1	HS6ST1	chr9:1549904-1715952	ENSG00000136720	HS6ST1	chr2:128236716-128318577	7.92756	7.50597	8.25217	7.92721	8.14554	7.50696	7.5737	8.91449	8.83952	9.348	19.7058	11.5948		9.43681	3.42846
ENSGALG00000002157	ENSGALG00000002157	RPS17	RPS17	chr10:1261675-1264001	ENSG00000182774	RPS17	chr15:82536753-82540564	5646.13	6107.44	6718.69	6190.98	8673.98	6460.11	6699.95	7754.88	10176.6	8533.13	6639.25	6762.35		7196.96	1323.88
ENSGALG00000002158	ENSGALG00000002158	GOLGA3	GOLGA3	chr15:1452609-1472361	ENSG00000090615	GOLGA3	chr12:132768909-132828858	9.49852	7.95114	7.14837	8.07383	7.93859	7.13544	8.20749	8.07218	5.03946	5.61991	11.8396	9.31315		7.98647	1.7754
ENSGALG00000002159	ENSGALG00000002159	ACOX1	ACOX1	chr18:4642266-4660259	ENSG00000161533	ACOX1	chr17:75941507-75979363	22.81	20.965	17.6013	23.4826	17.2409	17.8557	21.7151	17.1807	15.5059	19.0063	31.2066	25.5397		20.8425	4.45945
ENSGALG00000002160	ENSGALG00000002160	B2M	B2M	chr10:1248939-1257208	ENSG00000166710	B2M	chr15:44711477-44718877	255.351	299.904	371.514	257.012	286.155	274.16	250.801	259.668	412.569	294.97	259.736	217.793		286.636	54.6023
ENSGALG00000002162	ENSGALG00000002162	ACO1	ACO1	chrZ:70963354-71000137	ENSG00000122729	ACO1	chr9:32384603-32454769	28.4421	23.0585	17.5661	38.6106	20.8345	20.4914	34.8949	23.2779	16.6397	23.2178	30.876	64.714		28.552	13.2394
ENSGALG00000002164	ENSGALG00000002164	DDX59	DDX59	chr8:1446913-1454273	ENSG00000118197	DDX59	chr1:200623896-200669969	25.8881	24.6455	24.4202	30.5663	28.5693	22.7232	29.2069	23.6888	25.8281	25.5473	23.0694	26.1191		25.856	2.46331
ENSGALG00000002165	ENSGALG00000002165	UNC13B	UNC13B	chrZ:8647603-8854766	ENSG00000198722	UNC13B	chr9:35161992-35405338	3.32063	3.12066	4.18045	2.80989	3.28703	5.32369	3.10487	3.5437	2.00522	1.40897	1.81654	1.87583		2.98312	1.10854
ENSGALG00000002167	ENSGALG00000002167	PATL2	PATL2	chr10:1248939-1257208	ENSG00000229474	PATL2	chr15:44665732-44711316	19.3526	19.1382	19.4788	17.5133	19.3572	17.6231	15.3173	18.9323	23.3309	17.8827	15.4811	19.1003		18.5423	2.09018
ENSGALG00000002169	ENSGALG00000002169	PLEKHB2	PLEKHB2	chr9:2215875-2226714	ENSG00000115762	PLEKHB2	chr2:131104847-131353709	12.4419	9.12688	7.80035	13.7512	9.13278	7.87186	14.5848	11.5956	9.07811	17.2341	22.8235	17.9809		12.7852	4.69735
ENSGALG00000002170	ENSGALG00000002170	-	ENSGALG00000002170	chr26:3945332-3974291				0.0240884	0	0	0.0544055	0.0823756	0	0	0	0	0	0	0		0.0134058	0.027252
ENSGALG00000002172	ENSGALG00000002172	FAM168B	FAM168B	chr9:2246416-2260224	ENSG00000152102	FAM168B	chr2:131047876-131093460	10.881	8.42404	7.81054	9.55455	6.06331	6.92492	9.35823	8.60065	4.01804	6.43657	11.1628	11.6545		8.40743	2.29053
ENSGALG00000002175	ENSGALG00000002175	KIF14	KIF14	chr8:1456283-1483196	ENSG00000118193	KIF14	chr1:200551497-200620734	1.76701	1.7339	1.49754	1.66244	1.36499	2.11973	1.46607	1.55502	0.60701	0.976065	2.12804	1.70571		1.54863	0.430558
ENSGALG00000002179	ENSGALG00000002179	FBF1	FBF1	chr18:4661983-4675773	ENSG00000188878	FBF1	chr17:75909574-75941140	11.7064	14.969	13.9629	9.75039	12.486	10.7643	10.2681	11.4575	13.0688	12.4431	13.0119	12.2032		12.1743	1.50488
ENSGALG00000002180	ENSGALG00000002180	CHFR	CHFR	chr15:1523741-1535728	ENSG00000072609	CHFR	chr12:132822187-132956304	15.1256	16.0753	15.9754	12.6257	13.0546	18.1245	13.3008	13.3275	7.45156	9.14647	13.7427	14.1342		13.507	2.92043
ENSGALG00000002182	ENSGALG00000002182	NR5A2	NR5A2	chr8:1592875-1687096	ENSG00000116833	NR5A2	chr1:200027602-200177424	1.70423	0.743171	0.187568	1.98571	0.743652	0.501254	1.72394	1.17684	0.201402	2.17135	4.55415	3.60962		1.60857	1.35079
ENSGALG00000002183	ENSGALG00000002183	PRR16	PRR16	chrZ:71195873-71300629	ENSG00000184838	PRR16	chr5:120464278-120687332	0	0.109352	0	0.0961846	0.0547115	0	0.0505424	0	0.112189	0.144319	0.0589965	0.0991193		0.0604512	0.0518955
ENSGALG00000002186	ENSGALG00000002186	UNC45B	UNC45B	chr19:4437624-4446379	ENSG00000141161	UNC45B	chr17:35147817-35189345	0.0231395	0.0445507	0.0902089	0.026124	0.0297196	0.028694	0	0.0235159	0.106648	0.0653292	0.0320473	0.0538423		0.0436516	0.0306031
ENSGALG00000002187	ENSGALG00000002187	HSD17B4	HSD17B4	chrZ:71546996-71602452	ENSG00000133835	HSD17B4	chr5:119452443-119637199	6.78354	9.5296	7.79789	10.6557	12.0075	13.3535	12.883	10.6837	11.2162	12.1031	11.7434	9.61199		10.6974	1.98074
ENSGALG00000002189	ENSGALG00000002189	SNX1	SNX1	chr10:1235255-1247373	ENSG00000028528	SNX1	chr15:64094123-64146090	82.4864	81.0018	80.8177	87.6539	91.9698	74.5439	82.5122	78.8644	84.8956	80.0056	114.246	105.559		87.0464	11.6825
ENSGALG00000002191	ENSGALG00000002191	TLX3	TLX3	chr13:3303662-3305999	ENSG00000164438	TLX3	chr5:171309284-171312134	0.469416	0.640171	0.366002	0.463717	0.565222	0.436572	0.591771	0.238526	0.540876	0.231926	0.446959	0.750931		0.478507	0.153355
ENSGALG00000002192	ENSGALG00000002192	PTPRC	PTPRC	chr8:2036932-2110380	ENSG00000081237	PTPRC	chr1:198638671-198757283	0.167836	0.232657	0.439692	0.103563	0.215564	0.416249	0.111517	0.0892945	0.206389	0.303261	0.520678	0.161951		0.247388	0.142696
ENSGALG00000002193	ENSGALG00000002193	ARHGEF4	ARHGEF4	chr9:2275485-2312749	ENSG00000136002	ARHGEF4	chr2:130836916-131047263	0.135657	0.0994977	0.090661	0.131275	0.248905	0.120158	0.0689814	0.157558	0.0255197	0.0437711	0.563638	0.225467		0.159257	0.143484
ENSGALG00000002194	ENSGALG00000002194	MRPL38	MRPL38	chr18:4676170-4680973	ENSG00000204316	MRPL38	chr17:75898643-75905413	70.4541	72.7762	63.7777	74.6244	69.2328	62.5229	74.4124	78.435	85.681	71.6494	56.6156	85.3857		72.1306	8.66095
ENSGALG00000002197	ENSGALG00000002197	NPM1	NPM1	chr13:3270867-3282126	ENSG00000181163	NPM1	chr5:171387116-171411137	3954.27	4466.29	4029.27	4679.39	6182.37	4239.24	4859.7	4133.31	4819.13	4475.57	3195.46	4117.6		4429.3	713.853
ENSGALG00000002198	ENSGALG00000002198	FHOD1	FHOD1	chr11:1404553-1419045	ENSG00000135723	FHOD1	chr16:67229387-67247658	7.85817	8.20629	9.66784	8.00556	6.76835	8.3126	7.61344	7.76548	14.134	8.49799	5.81729	10.026		8.55608	2.0823
ENSGALG00000002199	ENSGALG00000002199	KLHL17	KLHL17	chr21:2863973-2910779	ENSG00000187961	KLHL17	chr1:960587-965715	0.476987	0.702933	0.74381	0.339061	0.249589	0.525765	0.335374	0.466792	1.09338	0.578568	0.929745	0.390513		0.569376	0.255096
ENSGALG00000002200	ENSGALG00000002200	ACSM3	ACSM3	chr14:14827850-14838188	ENSG00000005187	ACSM3	chr16:20610243-20797581	0	0.0198549	0	0	0	0	0	0	0	0	0.0642714	0.0179969		0.00851027	0.0190211
ENSGALG00000002201	ENSGALG00000002201	PPL	PPL	chr14:13315605-13335789	ENSG00000118898	PPL	chr16:4882507-4960741	4.65821	3.12934	3.44373	4.2152	4.58358	4.47652	4.42995	4.12952	3.14848	4.34954	1.4192	1.32233		3.6088	1.17387
ENSGALG00000002203	ENSGALG00000002203	FGF-18	FGF18	chr13:3197464-3262685	ENSG00000156427	FGF18	chr5:171419656-171457623	3.13586	3.6499	4.25296	5.37734	4.56557	1.91935	2.97356	6.5024	5.33635	15.4143	13.8846	9.01513		6.33561	4.30922
ENSGALG00000002204	ENSGALG00000002204	SLC7A4	SLC7A4	chr15:10123466-10126290	ENSG00000099960	SLC7A4	chr22:21028718-21032840	2.70494	4.87216	7.38743	1.78843	3.24381	5.48539	2.34056	5.01188	6.65162	3.45976	1.11766	0.660696		3.72703	2.15843
ENSGALG00000002205	ENSGALG00000002205	FBRSL1	FBRSL1	chr15:1561975-1610781	ENSG00000112787	FBRSL1	chr12:132489551-132585188	23.5392	11.8267	8.16242	24.4507	11.94	6.52909	20.1202	12.9382	10.698	20.0563	26.2487	29.3842		17.1578	7.70054
ENSGALG00000002207	ENSGALG00000002207	ATP6V1G3	ATP6V1G3	chr8:2118621-2130456	ENSG00000151418	ATP6V1G3	chr1:198523222-198540945	0	0	0	0	0	0	0	0	0	0.0276401	0.0338972	0		0.00512811	0.0120507
ENSGALG00000002210	ENSGALG00000002210	PPIB	PPIB	chr10:1233260-1234535	ENSG00000166794	PPIB	chr15:64155812-64163205	953.805	997.685	1093.85	944.973	1228.49	957.523	1014.36	945.94	1565.37	1460.93	1407.39	1169.99		1145.03	222.729
ENSGALG00000002216	ENSGALG00000002216	NEK7	NEK7	chr8:2184580-2273500	ENSG00000151414	NEK7	chr1:198156963-198322420	3.24752	5.26588	7.30528	2.84056	5.02815	6.26861	2.3954	3.87363	4.47529	3.84858	4.69381	2.41387		4.30471	1.51849
ENSGALG00000002219	ENSGALG00000002219	WBP2	WBP2	chr18:4696618-4703800	ENSG00000132471	WBP2	chr17:75845699-75856507	26.879	25.1304	22.6333	27.5651	24.1636	23.2306	26.2805	25.4503	26.5629	25.8747	33.5403	31.1361		26.5372	3.11653
ENSGALG00000002222	ENSGALG00000002222	NOC2L	NOC2L	chr21:2863973-2910779	ENSG00000188976	NOC2L	chr1:944204-959309	134.332	143.474	130.332	146.989	166.73	136.691	139.076	134.143	153.318	130.475	103.191	140.282		138.253	15.1764
ENSGALG00000002223	ENSGALG00000002223	LHX9	LHX9	chr8:2288064-2297811	ENSG00000143355	LHX9	chr1:197911902-197935478	0	0.0285476	0.104049	0	0	0.0275802	0.105557	0.0226031	0.0292881	0	0.0616066	0.0517523		0.0359153	0.0380282
ENSGALG00000002225	ENSGALG00000002225	RFFL	RFFL	chr19:4452956-4476638	ENSG00000092871	RFFL	chr17:35005990-35089319	8.9445	11.8359	9.3203	8.92862	14.4246	14.4163	8.18415	9.22201	7.01542	6.56214	5.14034	6.25624		9.18754	3.0078
ENSGALG00000002227	ENSGALG00000002227	DMXL1	DMXL1	chrZ:71667850-71706761	ENSG00000172869	DMXL1	chr5:119037772-119249138	2.29666	0.959475	1.25004	2.17092	1.35803	2.48816	2.16482	1.82424	0.628181	0.716447	0.980801	1.57345		1.53427	0.647939
ENSGALG00000002229	ENSGALG00000002229	FBXW11	FBXW11	chr13:2822077-2888100	ENSG00000072803	FBXW11	chr5:171861549-172006873	26.4897	25.2668	23.0337	25.1184	21.3687	22.9466	25.4953	24.0832	21.9686	23.958	35.5079	30.8145		25.5043	4.00122
ENSGALG00000002232	ENSGALG00000002232	RERE	RERE	chr21:3032374-3042010	ENSG00000142599	RERE	chr1:8352397-8817643	16.6456	13.0061	13.7603	14.4906	11.3877	16.7408	14.5275	18.5683	11.3281	11.3956	13.5222	14.8591		14.186	2.30103
ENSGALG00000002234	ENSGALG00000002234	UNC13D	UNC13D	chr18:4707607-4717561	ENSG00000092929	UNC13D	chr17:75827225-75844717	1.88727	1.40985	1.80628	2.35616	1.42359	1.69641	2.18	1.74545	2.28798	1.7479	3.13932	1.80071		1.95674	0.477567
ENSGALG00000002237	ENSGALG00000002237	ATP6V0D1	ATP6V0D1	chr11:1432056-1456454	ENSG00000159720	ATP6V0D1	chr16:67438014-67481237	68.4147	74.7169	69.367	67.7644	57.7768	64.0641	66.5354	68.936	78.0817	82.1372	83.6664	79.1441		71.7171	7.8368
ENSGALG00000002239	ENSGALG00000002239	REXO5	REXO5	chr14:14843498-14858122	ENSG00000005189	REXO5	chr16:20806429-20849668	24.7392	24.3406	28.4486	24.9286	26.3076	28.9075	24.94	27.5373	31.1633	26.4149	19.1719	21.0115		25.6593	3.30933
ENSGALG00000002240	ENSGALG00000002240	C3orf18	C3orf18	chr12:1772018-1778134	ENSG00000088543	C3orf18	chr3:50558025-50571027	0.854471	0.548374	0.832786	0.723512	1.92055	0.529791	0.633643	1.19401	0.2813	0.964964	0.443779	0.869852		0.816419	0.427421
ENSGALG00000002242	ENSGALG00000002242	GALNT9	GALNT9	chr15:2356779-2473501	ENSG00000182870	GALNT9	chr12:132196372-132329349	0.929322	0.596422	0.280427	0.923286	0.549376	0.599248	0.419002	0.577561	0.319116	0.629695	1.10688	0.697024		0.635613	0.248967
ENSGALG00000002244	ENSGALG00000002244	Agrp	AGRP	chr11:1457323-1459802	ENSG00000159723	AGRP	chr16:67482571-67483813	0.480713	0.539945	0.187474	0.407187	0	0.223622	0.570058	0.499294	0.63268	0.814158	0.333133	0.629374		0.443137	0.225958
ENSGALG00000002246	ENSGALG00000002246	DENND1B	DENND1B	chr8:2339756-2479306	ENSG00000213047	DENND1B	chr1:197504748-197775696	1.0426	0.458286	0.311793	0.983575	0.586987	0.407335	1.08453	0.595092	0.451368	0.725799	1.14725	1.21298		0.750633	0.324614
ENSGALG00000002247	ENSGALG00000002247	SETD6	SETD6	chr11:1466696-1470782	ENSG00000103037	SETD6	chr16:58515479-58521181	104.454	98.3576	78.634	102.193	98.4009	85.3504	101.951	102.173	93.2249	100.34	78.0069	126.996		97.5068	13.1199
ENSGALG00000002249	ENSGALG00000002249	AGO1	AGO1	chr23:4198876-4221506	ENSG00000092847	AGO1	chr1:35869808-35930528	15.5103	17.2045	20.6796	13.5653	15.1392	15.6427	13.9518	17.019	18.0327	15.2124	14.0464	15.2184		15.9352	2.01694
ENSGALG00000002250	ENSGALG00000002250	DTWD2	DTWD2	chrZ:71760524-71835348	ENSG00000169570	DTWD2	chr5:118837322-118988545	4.86133	5.64868	6.94507	8.27514	6.47643	8.84582	8.84898	5.76892	7.62424	6.42768	3.25137	5.84024		6.56782	1.66563
ENSGALG00000002253	ENSGALG00000002253	HEMK1	HEMK1	chr12:1780052-1810653	ENSG00000114735	HEMK1	chr3:50569152-50596168	17.3047	16.0241	17.5264	19.6362	18.5104	17.6323	17.7519	18.7272	21.5353	18.6948	10.7997	17.7192		17.6552	2.55401
ENSGALG00000002260	ENSGALG00000002260	CISH	CISH	chr12:1870817-1875257	ENSG00000114737	CISH	chr3:50606490-50611831	5.28955	3.37652	2.02904	3.64056	1.19889	1.50828	6.47741	3.24835	1.34095	17.4095	19.9795	6.4831		5.99847	6.23255
ENSGALG00000002262	ENSGALG00000002262	ETF1	ETF1	chr13:2788558-2813123	ENSG00000120705	ETF1	chr5:138506095-138543300	181.538	189.648	144.919	194.84	176.169	166.649	188.176	165.721	139.955	137.176	115.205	171.551		164.296	24.7859
ENSGALG00000002263	ENSGALG00000002263	KLHL6	KLHL6	chr9:2544468-2562883	ENSG00000172578	KLHL6	chr3:183487531-183555689	0.0377393	0	0.0624339	0.0142023	0.0323141	0.049648	0.0298517	0.122058	0.0828291	0.127858	0.919336	0.0292713		0.125628	0.253104
ENSGALG00000002266	ENSGALG00000002266	OGDHL	OGDHL	chr6:2853371-2902314	ENSG00000197444	OGDHL	chr10:49734643-49762379	0.907483	1.05084	0.95367	1.00226	1.08953	1.17425	0.983099	1.07261	0.597504	1.20306	2.36339	1.15908		1.12973	0.420243
ENSGALG00000002267	ENSGALG00000002267	DCUN1D3	DCUN1D3	chr14:14864771-14882612	ENSG00000188215	DCUN1D3	chr16:20854925-20900384	35.6553	36.3149	40.5852	34.7695	36.9254	39.282	34.2919	37.1108	39.3241	32.1665	30.5503	35.0509		36.0022	2.93693
ENSGALG00000002272	ENSGALG00000002272	NOC4L	NOC4L	chr15:2571850-2582310	ENSG00000184967	NOC4L	chr12:132144448-132152473	42.8642	54.225	38.1637	46.043	45.2513	43.1003	45.9529	48.9897	38.5229	36.1389	26.9184	44.1527		42.5269	6.95912
ENSGALG00000002273	ENSGALG00000002273	LYRM1	LYRM1	chr14:14882641-14893170	ENSG00000102897	LYRM1	chr16:20899868-20925006	27.9005	33.0805	39.0632	30.774	41.9187	40.1734	33.1992	37.6154	54.3441	39.9408	31.8025	26.7155		36.3773	7.55507
ENSGALG00000002276	ENSGALG00000002276	EME2	EME2	chr14:13277093-13283352	ENSG00000197774	EME2	chr16:1773207-1781708	8.3201	8.56812	8.07124	9.17481	7.76607	9.53751	8.55173	8.55378	12.1028	11.0348	8.24029	9.11708		9.08653	1.28
ENSGALG00000002277	ENSGALG00000002277	KLHL24	KLHL24	chr9:2573430-2586955	ENSG00000114796	KLHL24	chr3:183635568-183684477	6.10931	7.3168	8.28785	5.53874	5.63728	8.5228	6.1504	7.90981	7.25266	6.94287	14.5613	7.26031		7.62418	2.39405
ENSGALG00000002278	ENSGALG00000002278	UNK	UNK	chr18:4723735-4760008	ENSG00000132478	UNK	chr17:75784771-75825799	9.33843	7.77669	6.61362	8.69902	8.4753	8.37881	8.87653	9.59742	6.46947	7.27361	7.02305	9.36286		8.15707	1.10072
ENSGALG00000002282	ENSGALG00000002282	TMEM200A	TMEM200A	chr3:57945698-57947168	ENSG00000164484	TMEM200A	chr6:130365734-130443063	9.69442	20.3036	28.9812	9.34314	11.0846	21.7853	8.83722	20.0647	16.9694	11.3486	8.15408	6.54719		14.4261	7.00862
ENSGALG00000002283	ENSGALG00000002283	MAPKAPK3	MAPKAPK3	chr12:1880036-1922149	ENSG00000114738	MAPKAPK3	chr3:50611520-50649297	7.40629	7.0579	8.62461	6.76144	7.28145	8.82735	6.78981	5.78316	8.19523	6.78749	6.84813	6.91815		7.27342	0.874612
ENSGALG00000002284	ENSGALG00000002284	TRAPPC3	TRAPPC3	chr23:4113728-4118936	ENSG00000054116	TRAPPC3	chr1:36136570-36156053	51.4835	61.3339	72.5687	56.3445	57.1644	67.6929	55.7524	59.8067	84.8521	70.9005	66.5909	55.6307		63.3434	9.51449
ENSGALG00000002285	ENSGALG00000002285	SPSB3	SPSB3	chr14:13267439-13274776	ENSG00000162032	SPSB3	chr16:1776712-1793700	20.2185	17.818	14.4791	20.2831	19.6407	14.1483	17.4487	17.737	17.412	22.0677	28.154	29.5526		19.9133	4.76726
ENSGALG00000002286	ENSGALG00000002286	-	H3F3B	chr18:4763339-4765084				642.547	635.456	704.258	716.807	841.094	635.577	696.306	679.798	874.617	921.839	1216.43	784.487		779.101	168.065
ENSGALG00000002287	ENSGALG00000002287	CRB1	CRB1	chr8:2514509-2526281	ENSG00000134376	CRB1	chr1:197268204-197478455	0.0140413	0.0180226	0.0218959	0	0	0.0174118	0.0832998	0.0428091	0.166411	0	0.0388933	0		0.0335654	0.048394
ENSGALG00000002288	ENSGALG00000002288	LIG3	LIG3	chr19:4477144-4492384	ENSG00000005156	LIG3	chr17:34980494-35009743	63.6389	61.6082	58.869	69.0479	67.4026	68.4755	66.674	66.3281	73.4593	63.7333	39.6446	62.7023		63.4653	8.43599
ENSGALG00000002289	ENSGALG00000002289	CHAT	CHAT	chr6:2918417-2949655	ENSG00000070748	CHAT	chr10:49609095-49665104	0.0907773	0.0232498	0.0463774	0.0613523	0.0954946	0.110639	0.15045	0.0604524	0.047707	0.537381	1.31808	0.105599		0.22063	0.371454
ENSGALG00000002294	ENSGALG00000002294	SEMA6A	SEMA6A	chrZ:72560782-72672912	ENSG00000092421	SEMA6A	chr5:116443616-116574934	20.8686	18.5453	11.2415	22.0591	11.8364	13.6259	25.8503	28.2872	15.6035	28.6857	15.737	17.7248		19.1721	6.05951
ENSGALG00000002298	ENSGALG00000002298	COL8A2	COL8A2	chr23:4146475-4152419	ENSG00000171812	COL8A2	chr1:36095236-36125220	2.73838	2.88133	8.7142	1.90527	3.00588	6.12017	2.79572	4.06112	12.0759	6.25688	0.859937	1.35216		4.39725	3.32597
ENSGALG00000002299	ENSGALG00000002299	RGR	RGR	chr6:2981027-2994885	ENSG00000148604	RGR	chr10:84245053-84259960	0	0	0	0.0347872	0	0	0	0	0	0	0	0		0.00289893	0.0100422
ENSGALG00000002301	ENSGALG00000002301	CNOT1	CNOT1	chr11:1472261-1525501	ENSG00000125107	CNOT1	chr16:58519951-58629886	129.042	95.7717	68.8243	115.212	88.3274	94.5936	112.018	99.1751	56.5157	71.2501	63.5227	98.922		91.0979	22.3067
ENSGALG00000002303	ENSGALG00000002303	LRIT1	LRIT1	chr6:3009060-3019674	ENSG00000148602	LRIT1	chr10:84231593-84241461	0.053376	0.0228368	0	0.0200869	0.0228515	0.0220629	0.0422204	0.0361629	0	0	0.0246413	0.0206997		0.0220782	0.0166777
ENSGALG00000002304	ENSGALG00000002304	ADPRHL2	ADPRHL2	chr23:4155703-4160470	ENSG00000116863	ADPRHL2	chr1:36088875-36093932	37.8457	42.0786	41.2768	38.6088	41.5201	43.8712	38.1759	38.2831	41.0917	37.0489	28.7415	38.1681		38.8925	3.8304
ENSGALG00000002305	ENSGALG00000002305	-	ENSGALG00000002305	chr8:2596627-2608874	ENSG00000177888	ZBTB41	chr1:197153680-197200542	4.67055	3.28799	2.80553	4.69456	2.58618	3.56071	4.83477	3.30562	2.03966	2.65071	4.35636	3.89519		3.55732	0.9384
ENSGALG00000002307	ENSGALG00000002307	LRIT2	LRIT2	chr6:3027170-3030807	ENSG00000204033	LRIT2	chr10:84220495-84225589	0.0432939	0	0.0675122	0.048878	0	0.0268432	0	0	0.0285055	0	0.0899405	0.0251847		0.0275132	0.0301426
ENSGALG00000002308	ENSGALG00000002308	COMMD10	COMMD10	chrZ:72731135-72825323	ENSG00000145781	COMMD10	chr5:116084991-116412762	24.1961	27.5226	28.2598	35.617	30.4086	34.6078	35.4592	29.0672	38.9156	30.1811	22.2066	28.6992		30.4284	4.91954
ENSGALG00000002311	ENSGALG00000002311	GALK1	GALK1	chr18:4772711-4775575	ENSG00000108479	GALK1	chr17:75751594-75765711	11.9385	12.054	12.826	11.1569	11.5494	12.7873	10.1959	11.4154	15.3978	16.9829	16.7894	12.4614		12.9629	2.22012
ENSGALG00000002312	ENSGALG00000002312	TMEM132E	TMEM132E	chr19:4725844-4734892	ENSG00000181291	TMEM132E	chr17:34579487-34639318	4.14119	5.3232	18.7478	3.63045	4.69671	9.68615	2.48775	5.11577	16.9571	5.47418	2.91824	4.31928		6.95815	5.41109
ENSGALG00000002313	ENSGALG00000002313	-	ENSGALG00000002313	chr11:1526056-1533303	ENSG00000103042	SLC38A7	chr16:58665109-58685104	40.9342	26.4069	19.2123	28.3223	23.6141	21.6706	27.5164	23.2298	15.8109	26.708	30.4339	33.6277		26.4573	6.66553
ENSGALG00000002314	ENSGALG00000002314	CDHR1	CDHR1	chr6:3035223-3068706	ENSG00000148600	CDHR1	chr10:84194635-84219621	0.0211626	0	0.0330008	0.0238922	0.0543612	0.0131213	0	0.0107534	0	0.0238992	0.0146547	0.0123106		0.017263	0.0157019
ENSGALG00000002315	ENSGALG00000002315	-	ENSGALG00000002315	chr9:2645265-2656684	ENSG00000283765	AC131160.1	chr3:183815568-183884889	154.368	149.462	148.643	175.696	190.351	146.764	176.107	172.145	199.533	195.577	186.634	180.01		172.941	18.9502
ENSGALG00000002316	ENSGALG00000002316	NUBP2	NUBP2	chr14:13262748-13267079	ENSG00000095906	NUBP2	chr16:1782901-1789191	88.5292	95.6302	50.348	99.1035	77.4662	53.4602	87.0443	77.744	60.4644	78.8836	58.5568	121.489		79.06	21.063
ENSGALG00000002318	ENSGALG00000002318	LVRN	LVRN	chrZ:72837939-72873809	ENSG00000172901	LVRN	chr5:115962454-116027619	0.257695	0.471512	0.401848	0.247603	0.253513	0.34675	0.169141	0.273031	0.187721	0.160989	0.0835293	0.0893051		0.24522	0.118204
ENSGALG00000002319	ENSGALG00000002319	TEKT2	TEKT2	chr23:4160724-4165099	ENSG00000092850	TEKT2	chr1:36084075-36088275	0.963183	0.443795	0.770247	0.585532	0.602682	0.520632	0.29303	0.752963	1.36592	0.44625	1.40238	1.09186		0.769873	0.364213
ENSGALG00000002321	ENSGALG00000002321	GOT2	GOT2	chr11:1534042-1544632	ENSG00000125166	GOT2	chr16:58707131-58734357	441.77	492.853	472.295	455.97	550.761	474.676	473.307	505.886	667.643	594.188	409.318	475.937		501.217	71.2698
ENSGALG00000002325	ENSGALG00000002325	IGFALS	IGFALS	chr14:13259079-13261144	ENSG00000099769	IGFALS	chr16:1790413-1794971	2.8622	2.28432	0.429164	3.31423	1.22538	0.591544	3.15654	1.88324	0.700658	2.03056	0.889369	3.58612		1.91278	1.14022
ENSGALG00000002326	ENSGALG00000002326	-	ENSGALG00000002326	chrZ:8885736-8943793				3.44441	2.63892	0.929897	2.24076	1.74898	1.19197	2.83013	2.39694	0.668053	0.884506	0.677961	1.11832		1.7309	0.950351
ENSGALG00000002329	ENSGALG00000002329	-	CCL1	chr19:4765353-4766571	ENSG00000108702	CCL1	chr17:34360328-34363231	11.4393	1.92006	1.37218	11.5239	2.37337	0.218235	10.0229	1.52024	1.62224	1.68935	0.121869	0.307126		3.67756	4.48207
ENSGALG00000002335	ENSGALG00000002335	DOCK3	DOCK3	chr12:1967649-2179125	ENSG00000088538	DOCK3	chr3:50675241-51384198	0.0566606	0.0462792	0.0943976	0.0232596	0.0132289	0.0510986	0.0478829	0.0366424	0.0474797	0.0290838	0.118772	0.0586898		0.0519563	0.0293624
ENSGALG00000002336	ENSGALG00000002336	-	ENSGALG00000002336	chr15:2583972-2627349				6.82003	5.42642	7.3439	5.70539	5.9645	9.16834	6.05439	8.30318	5.85634	5.1593	5.16528	5.42574		6.36607	1.2929
ENSGALG00000002341	ENSGALG00000002341	AP3S1	AP3S1	chrZ:72903092-72932147	ENSG00000177879	AP3S1	chr5:115841481-115914081	62.6226	76.4212	89.5349	84.366	83.9395	93.5882	88.6117	80.2556	90.773	83.2755	60.402	64.8573		79.8873	11.4382
ENSGALG00000002345	ENSGALG00000002345	ATG12	ATG12	chrZ:72932223-72934699	ENSG00000145782	ATG12	chr5:115828200-115841858	57.2155	58.9838	68.7851	67.7658	67.8023	67.1157	69.1315	62.8453	92.4145	80.7277	62.9373	69.0084		68.7277	9.55984
ENSGALG00000002346	ENSGALG00000002346	CLSPN	CLSPN	chr23:4239189-4252716	ENSG00000092853	CLSPN	chr1:35720218-35769967	23.9297	23.8913	22.7261	23.8917	34.9172	24.3787	24.0446	23.5263	22.4765	20.0971	16.3647	22.9397		23.5986	4.22384
ENSGALG00000002347	ENSGALG00000002347	C3orf58	C3orf58	chr9:10928330-10941709	ENSG00000181744	C3orf58	chr3:143971798-144048719	4.39439	4.1621	5.5123	3.96642	2.96107	6.51786	3.76766	3.57426	2.90368	1.88733	1.62096	1.57689		3.57041	1.51076
ENSGALG00000002350	ENSGALG00000002350	-	ENSGALG00000002350	chr14:14899418-14963460				1.48355	1.30506	2.20173	1.60707	1.6947	2.0861	1.26945	1.62041	1.64016	1.14302	0.809701	0.690939		1.46266	0.452536
ENSGALG00000002353	ENSGALG00000002353	C1orf216	C1orf216	chr23:4262380-4263094	ENSG00000142686	C1orf216	chr1:35713875-35719472	4.33522	4.73728	2.19253	4.49754	4.58986	3.19646	5.14373	4.58435	2.39151	5.02813	6.97775	9.26953		4.74532	1.91707
ENSGALG00000002354	ENSGALG00000002354	PUS1	PUS1	chr15:2631282-2634476	ENSG00000177192	PUS1	chr12:131929200-131945896	57.3514	57.1929	49.8048	53.9734	69.8574	57.4294	52.7665	47.3871	42.815	36.2309	24.2071	49.1987		49.8512	11.6481
ENSGALG00000002356	ENSGALG00000002356	CMTR2	CMTR2	chr11:1571362-1573654	ENSG00000180917	CMTR2	chr16:71281389-71289715	4.71906	3.00094	2.14727	3.78933	2.30282	3.96645	3.31865	2.97371	0.717754	0.890915	2.54277	3.18737		2.79642	1.17672
ENSGALG00000002358	ENSGALG00000002358	CDO1	CDO1	chrZ:72942622-72952484	ENSG00000129596	CDO1	chr5:115804733-115816954	6.53429	9.61282	10.3071	7.49059	8.0051	8.38329	7.33546	9.39898	12.4436	8.62804	4.21161	7.77761		8.34404	2.04491
ENSGALG00000002362	ENSGALG00000002362	MANF	MANF	chr12:2186154-2189920	ENSG00000145050	MANF	chr3:51385047-51389397	101.403	111.119	162.105	108.194	140.583	123.997	117.13	130.538	234.012	192.502	156.334	123.129		141.754	39.083
ENSGALG00000002363	ENSGALG00000002363	HSPA9	HSPA9	chr13:2764274-2785877	ENSG00000113013	HSPA9	chr5:138554882-138575444	566.899	618.641	672.961	663.105	744.474	640.08	660.594	621.848	873.034	725.853	420.005	499.216		642.226	116.355
ENSGALG00000002364	ENSGALG00000002364	-	SEC16A	chr17:8336016-8357973	ENSG00000148396	SEC16A	chr9:136440096-136483759	12.3297	9.05284	9.03848	9.69442	8.07082	12.7972	10.4569	10.6116	5.74288	6.57928	9.36181	8.78181		9.37648	2.05651
ENSGALG00000002367	ENSGALG00000002367	-	ENSGALG00000002367	chr19:4811122-4823215				1.30113	1.05237	0.472502	1.24761	1.07594	1.08301	1.37461	0.797003	0.375536	0.402572	0.419649	0.953887		0.879652	0.374067
ENSGALG00000002369	ENSGALG00000002369	F13B	F13B	chr8:2652339-2658594	ENSG00000143278	F13B	chr1:197039191-197067267	0.0350842	0	0	0	0	0	0	0	0	0	0	0		0.00292368	0.0101279
ENSGALG00000002370	ENSGALG00000002370	SH2D4B	SH2D4B	chr6:4229968-4293908	ENSG00000178217	SH2D4B	chr10:80537902-80646560	0.147996	0.0759836	0	0.200502	0.114049	0.0734088	0.105358	0.0902422	0.311819	0.10028	0.0409938	0.0688732		0.110792	0.0808645
ENSGALG00000002371	ENSGALG00000002371	RUSC2	RUSC2	chrZ:8966839-8999279	ENSG00000198853	RUSC2	chr9:35490127-35561898	0.309487	0.148963	0.100542	0.320288	0.306403	0.231865	0.252454	0.18843	0.00848862	0.189596	0.366311	0.172531		0.21628	0.102777
ENSGALG00000002372	ENSGALG00000002372	-	ENSGALG00000002372	chr12:2191776-2193041	ENSG00000259956	RBM15B	chr3:51391268-51397908	89.7914	95.8237	103.872	92.9059	96.2359	94.6901	91.6529	106.634	137.454	117.186	108.211	106.132		103.382	13.514
ENSGALG00000002374	ENSGALG00000002374	SLC9A9	SLC9A9	chr9:10731067-10904722	ENSG00000181804	SLC9A9	chr3:143265222-143848531	0	0	0	0	0	0	0.013232	0	0	0	0	0		0.00110267	0.00381975
ENSGALG00000002375	ENSGALG00000002375	NOTCH1	NOTCH1	chr17:8295292-8329319	ENSG00000148400	NOTCH1	chr9:136494444-136545862	6.23658	4.80545	6.71726	4.63881	4.02178	5.63659	4.60838	4.0068	5.15752	3.95573	4.44958	4.19655		4.86925	0.904889
ENSGALG00000002377	ENSGALG00000002377	-	ENO1	chr21:3211464-3223868				2527.07	2583.75	2617.66	2816.53	2746.42	2434.7	2876.17	2728.74	3413.55	3171.92	2462.73	2839.94		2768.26	289.199
ENSGALG00000002379	ENSGALG00000002379	-	MRPS17	chr19:4824161-4826904	ENSG00000249773	AC092647.5	chr7:55887277-55955239	96.8588	95.5458	126.28	117.799	141.808	112.532	115.903	112.46	160.607	123.06	102.947	108.288		117.841	18.6185
ENSGALG00000002383	ENSGALG00000002383	-	CD72AG	chrZ:9066088-9069222	ENSG00000137101	CD72	chr9:35609533-35646810	0.027868	0	0	0	0	0	0	0	0	0.0314717	0	0		0.00494497	0.0115745
ENSGALG00000002386	ENSGALG00000002386	TMEM8B	TMEM8B	chrZ:9080883-9083678	ENSG00000137103	TMEM8B	chr9:35814451-35865518	0.454565	0.503891	0.322203	0.39656	0.265377	0.614925	0.392248	0.440962	0.598588	0.443344	0.486474	0.40866		0.443983	0.100699
ENSGALG00000002388	ENSGALG00000002388	NIPSNAP2	GBAS	chr19:4827520-4867667	ENSG00000146729	NIPSNAP2	chr7:55951793-56000181	46.5824	54.7509	73.3676	49.1356	68.2051	72.8458	57.54	65.7358	78.5609	70.2667	50.4368	39.8142		60.6035	12.5048
ENSGALG00000002389	ENSGALG00000002389	ITGB4	ITGB4	chr18:4776920-4798548	ENSG00000132470	ITGB4	chr17:75721328-75757818	0.945215	0.382339	0.244235	1.06265	0.244825	0.274431	1.02105	0.441474	0.22003	0.992629	0.566416	0.542856		0.578179	0.335605
ENSGALG00000002390	ENSGALG00000002390	-	ENSGALG00000002390	chr21:3233196-3234388				0.176096	0.376711	1.00688	0	0.376955	0.582313	0.139292	0.238614	0.772967	0.530313	0.650364	0.136584		0.415591	0.300303
ENSGALG00000002394	ENSGALG00000002394	RGP1	RGP1	chrZ:9116331-9137569	ENSG00000107185	RGP1	chr9:35749287-35758575	14.4326	15.3475	11.1824	14.588	11.8632	12.6986	14.3727	13.5078	15.8623	15.3433	16.3581	19.8379		14.6162	2.28207
ENSGALG00000002395	ENSGALG00000002395	-	ENSGALG00000002395	chr6:4311821-4343224				0.0385597	0.0989859	0.300649	0.108833	0.0990497	0.0478157	0.137253	0.0391869	0.15233	0.108865	0	0.0672959		0.099902	0.0773484
ENSGALG00000002397	ENSGALG00000002397	PSPH	PSPH	chr19:4827520-4867667	ENSG00000146733	PSPH	chr7:56011051-56051604	3.49724	3.93024	3.82234	5.29592	5.46284	5.27663	4.34204	4.57885	5.20057	5.65369	4.07771	5.22528		4.69695	0.741311
ENSGALG00000002399	ENSGALG00000002399	-	ENSGALG00000002399	chrZ:73017240-73028247	ENSG00000183474	GTF2H2C	chr5:69560208-69594723	38.6385	45.3036	38.3985	46.3413	46.2662	40.5501	49.9831	45.0696	42.5418	39.6958	29.7038	49.277		42.6474	5.65854
ENSGALG00000002403	ENSGALG00000002403	ULK1	ULK1	chr15:2638996-2708090	ENSG00000177169	ULK1	chr12:131894651-131923167	4.70986	4.61064	3.13655	3.11758	2.46815	4.27442	2.41588	3.15073	1.07507	1.54592	4.48411	3.59481		3.21531	1.19244
ENSGALG00000002407	ENSGALG00000002407	HYDIN	HYDIN	chr11:1604962-1708650	ENSG00000157423	HYDIN	chr16:70807378-71230722	0.0822103	0.0452048	0.0109907	0.0689428	0.0362099	0.0116533	0.0696574	0.0668533	0.012375	0.034466	0.016269	0.0382669		0.0410916	0.0256767
ENSGALG00000002408	ENSGALG00000002408	NCDN	NCDN	chr23:4321923-4325915	ENSG00000020129	NCDN	chr1:35557473-35567274	32.8675	35.2197	26.1037	32.6246	30.6114	30.8947	30.0703	30.4125	30.2196	29.9293	24.4637	35.831		30.7707	3.25387
ENSGALG00000002412	ENSGALG00000002412	GBA2	GBA2	chrZ:9116331-9137569	ENSG00000070610	GBA2	chr9:35736866-35749228	17.2364	17.1841	16.64	15.367	14.0876	15.676	16.8169	17.0842	20.0894	22.2596	24.4186	19.2657		18.0105	2.98917
ENSGALG00000002413	ENSGALG00000002413	CELF4	CELF4	chrZ:6773305-6853237	ENSG00000101489	CELF4	chr18:37243047-37566037	0.0678409	0.0435383	0.0528953	0.0382956	0	0	0.12074	0	0.0446677	0.22984	0.140935	0.118392		0.0714287	0.069293
ENSGALG00000002414	ENSGALG00000002414	TSPAN14	TSPAN14	chr6:4348171-4370634	ENSG00000108219	TSPAN14	chr10:80454166-80533123	16.2268	16.4145	16.0541	14.3925	13.3777	20.521	14.0999	15.183	8.92323	8.40186	11.3621	10.3634		13.7767	3.51852
ENSGALG00000002415	ENSGALG00000002415	SAP30BP	SAP30BP	chr18:4803626-4833093	ENSG00000161526	SAP30BP	chr17:75667116-75708062	40.8587	48.2863	44.1968	45.7909	51.5507	41.7601	44.2596	41.4518	51.5325	47.2157	44.7874	42.3545		45.3371	3.68079
ENSGALG00000002417	ENSGALG00000002417	-	ENSGALG00000002417	chr7:22255212-22258170	ENSG00000144591	GMPPA	chr2:219498867-219506989	24.6873	22.2278	25.4754	21.481	16.6276	25.8528	24.7697	21.1874	25.7933	21.867	26.6231	26.342		23.5779	2.9606
ENSGALG00000002419	ENSGALG00000002419	KIAA1328	KIAA1328	chrZ:6946049-7102756	ENSG00000150477	KIAA1328	chr18:36829106-37232172	2.0199	1.56422	1.30193	1.81675	2.08409	1.46112	2.07706	1.43693	1.19695	1.09493	1.01642	1.57451		1.55373	0.3759
ENSGALG00000002421	ENSGALG00000002421	FAM213A	FAM213A	chr6:4394066-4405386	ENSG00000122378	FAM213A	chr10:80407829-80437115	94.8219	90.8227	90.1587	115.297	107.764	91.6678	110.656	92.9261	110.553	147.355	316.439	143.088		125.962	63.0317
ENSGALG00000002424	ENSGALG00000002424	RECQL5	RECQL5	chr18:4833138-4870020	ENSG00000108469	RECQL5	chr17:75626845-75667189	8.01248	9.45171	8.59282	7.91922	7.38864	8.84858	7.43459	7.62122	7.79131	7.15675	8.96446	7.0661		8.02066	0.773096
ENSGALG00000002426	ENSGALG00000002426	EXOSC3	EXOSC3	chr6:4414241-4417915	ENSG00000107371	EXOSC3	chr9:37766978-37801437	53.429	52.6248	55.8697	59.1902	79.7114	47.4279	55.1785	43.7437	62.9975	51.6711	34.3124	64.8297		55.0822	11.3647
ENSGALG00000002427	ENSGALG00000002427	SMIM5	SMIM5	chr18:4833138-4870020	ENSG00000204323	SMIM5	chr17:75633434-75641404	2.1937	2.2682	1.362	1.74282	2.00878	2.29209	1.27731	1.30047	1.6851	1.62864	0.815809	0.732578		1.60896	0.530045
ENSGALG00000002428	ENSGALG00000002428	ZP2	ZP2	chr14:14975340-14983122	ENSG00000103310	ZP2	chr16:21197450-21214510	3.87258	1.82528	1.06918	3.25397	1.61446	0.787243	2.95274	1.79359	1.50479	2.3229	5.36338	6.61788		2.74817	1.77905
ENSGALG00000002430	ENSGALG00000002430	-	SMN	chrZ:73033081-73038590	ENSG00000205571	SMN2	chr5:70049612-70078522	169.027	199.835	184.723	199.948	212.365	207.684	214.068	187.907	200.632	191.828	158.514	193.131		193.305	16.6418
ENSGALG00000002431	ENSGALG00000002431	-	ENSGALG00000002431	chr8:2661072-2693248	ENSG00000134365	CFHR4	chr1:196850241-196918972	0.0564214	0.0206912	0.025138	0.0454991	0.0103523	0.01999	0.0191268	0.0327652	0.010614	0.0364099	0.0111631	0.0937746		0.0318288	0.0242328
ENSGALG00000002432	ENSGALG00000002432	DYDC1	DYDC1	chr6:4418063-4421743	ENSG00000170788	DYDC1	chr10:80336105-80356755	0.425065	0.545588	0.441896	0.746497	0.424621	0.468533	0.448302	0.335984	0.248774	0.0533368	0.392466	0.274741		0.400484	0.168998
ENSGALG00000002437	ENSGALG00000002437	FAM69B	FAM69B	chr17:8212588-8217599	ENSG00000165716	FAM69B	chr9:136712570-136724050	15.6024	10.2665	9.98729	22.9787	10.5475	14.4225	21.8907	11.1843	12.5626	13.878	10.0903	20.3739		14.4821	4.77417
ENSGALG00000002439	ENSGALG00000002439	-	ENSGALG00000002439	chrZ:73045587-73100799	ENSG00000145734	BDP1	chr5:71455615-71567820	6.89057	5.8169	6.91851	7.86756	7.6838	8.22102	7.9964	7.57341	7.53594	6.34856	4.47166	6.16227		6.95722	1.0969
ENSGALG00000002442	ENSGALG00000002442	ANKS4B	ANKS4B	chr14:14984984-14990390	ENSG00000175311	ANKS4B	chr16:21233665-21253845	0.415621	0.381047	0.324058	0.301647	0.305035	0.662642	0.317014	0.301701	0.742771	0.469365	0.246694	0.518084		0.415473	0.155934
ENSGALG00000002443	ENSGALG00000002443	FBXL16	FBXL16	chr14:13213585-13226428	ENSG00000127585	FBXL16	chr16:692498-705829	0.687162	0.693001	0.497508	0.609552	0.378245	0.547786	0.684284	0.660929	0.856405	0.706733	0.509836	0.92795		0.646616	0.152643
ENSGALG00000002445	ENSGALG00000002445	KIAA0319L	KIAA0319L	chr23:4330958-4351341	ENSG00000142687	KIAA0319L	chr1:35433490-35557950	10.563	12.2478	8.72834	9.18093	9.06676	11.8864	10.5006	10.9722	7.19981	9.49624	14.4616	9.31007		10.3011	1.92286
ENSGALG00000002447	ENSGALG00000002447	CTNNA1	CTNNA1	chr13:2590010-2698188	ENSG00000044115	CTNNA1	chr5:138610967-138935034	185.579	195.288	245.602	184.259	201.84	244.689	191.534	223.411	235.72	205.888	196.247	145.88		204.661	28.8738
ENSGALG00000002448	ENSGALG00000002448	CCT6	CCT6	chr19:4871787-4878028	ENSG00000132141	CCT6B	chr17:34927859-34981078	600.175	683.434	692.905	692.32	720.85	656.419	694.495	707.194	980.501	857.273	626.043	669.752		715.113	104.37
ENSGALG00000002450	ENSGALG00000002450	WDR24	WDR24	chr14:13206703-13212446	ENSG00000127580	WDR24	chr16:684622-690444	27.3202	25.7651	24.3715	26.6988	21.5159	22.2261	24.0035	25.408	28.851	27.2931	24.9908	35.2981		26.1452	3.57574
ENSGALG00000002452	ENSGALG00000002452	AQP3	AQP3	chrZ:7196649-7209336	ENSG00000165272	AQP3	chr9:33441154-33447611	1.19604	0.85287	0.414466	1.00023	0.853421	0.274656	1.78702	0.990404	1.04999	1.30068	2.08592	2.26764		1.17278	0.609832
ENSGALG00000002453	ENSGALG00000002453	ABCA7	ABCA7	chr28:2927135-2938279	ENSG00000064687	ABCA7	chr19:1040101-1065572	2.25119	2.38962	1.8629	2.42614	1.83339	2.00045	1.98469	1.66739	1.91707	1.75307	1.45312	2.41064		1.99581	0.31468
ENSGALG00000002455	ENSGALG00000002455	LRRTM2	LRRTM2	chr13:2590010-2698188	ENSG00000146006	LRRTM2	chr5:138868923-138875368	0.0317636	0	0	0	0	0	0	0	0	0.035871	0	0.0369547		0.00871578	0.0158106
ENSGALG00000002457	ENSGALG00000002457	SIL1	SIL1	chr13:2496558-2587285	ENSG00000120725	SIL1	chr5:138946720-139293557	16.3208	15.7693	15.8886	17.833	19.5418	14.5641	16.8145	14.6204	18.7026	15.6491	13.7238	14.8677		16.1913	1.76204
ENSGALG00000002458	ENSGALG00000002458	VAC14	VAC14	chr11:1709327-1760287	ENSG00000103043	VAC14	chr16:70687439-70801161	37.9657	47.4614	66.7362	30.7231	38.0072	47.9709	40.647	60.6896	100.832	69.3686	40.5099	30.9546		50.9889	20.3442
ENSGALG00000002461	ENSGALG00000002461	-	ENSGALG00000002461	chr15:2725943-2728629				13.9963	19.8539	29.4759	13.2277	22.2388	23.1175	12.8059	21.7905	36.3296	23.2692	17.9455	16.0151		20.8388	6.94403
ENSGALG00000002463	ENSGALG00000002463	SUMF2	SUMF2	chr19:4879161-4882722	ENSG00000129103	SUMF2	chr7:56064002-56080670	21.0444	23.2776	25.5923	20.7179	26.1985	21.7318	19.7282	20.9852	34.3326	34.594	30.8864	22.1021		25.0992	5.35469
ENSGALG00000002466	ENSGALG00000002466	-	SLC2A5	chr21:3236366-3247209	ENSG00000142583	SLC2A5	chr1:9035107-9088478	0.0220774	0.0283373	0.0344274	0	0	0.027377	0.0523897	0.0224366	0	0.224391	0.642105	0		0.0877951	0.185037
ENSGALG00000002467	ENSGALG00000002467	MTSS1L	MTSS1L	chr11:1761865-1771769	ENSG00000132613	MTSS1L	chr16:70661204-70686066	8.24751	7.86776	6.72798	5.00463	5.2204	3.34385	4.58849	4.34457	5.00594	4.35248	6.77698	3.04543		5.37717	1.67432
ENSGALG00000002469	ENSGALG00000002469	CDC73	CDC73	chr8:3404601-3498996	ENSG00000134371	CDC73	chr1:193122017-193253901	25.4401	28.203	30.5403	26.736	29.633	31.8815	26.4857	30.7689	26.0267	24.0356	22.3082	23.2155		27.1062	3.12831
ENSGALG00000002470	ENSGALG00000002470	CYP27A1	CYP27A1	chr7:22543082-22545995	ENSG00000135929	CYP27A1	chr2:218781749-218815293	5.6909	5.29271	3.57379	6.38641	4.877	3.28336	6.64376	4.99216	5.02743	7.68074	8.4325	7.81376		5.80788	1.63033
ENSGALG00000002473	ENSGALG00000002473	GPR157	GPR157	chr21:3250803-3257577	ENSG00000180758	GPR157	chr1:9100305-9129170	8.70588	10.076	7.25208	7.85462	4.63509	7.65847	7.98992	9.98179	7.69181	7.94095	12.7272	8.57041		8.42368	1.93934
ENSGALG00000002477	ENSGALG00000002477	B3GALT2	B3GALT2	chr8:3404601-3498996	ENSG00000162630	B3GALT2	chr1:193179045-193186654	0	0	0	0	0	0	0	0	0	0	0	0		0	0
ENSGALG00000002478	ENSGALG00000002478	-	MATR3	chr13:2454667-2480656	ENSG00000280987	MATR3	chr5:139273752-139331671	160.225	173.586	198.279	161.457	184.628	191.446	169.529	189.237	159.785	147.069	169.729	145.371		170.862	17.1973
ENSGALG00000002479	ENSGALG00000002479	MAT1A	MAT1A	chr6:4436645-4453363	ENSG00000151224	MAT1A	chr10:80271820-80289684	0.409589	0.283082	0.29479	0.462419	0.485598	0.293024	0.242989	0.256155	0.373405	0.32023	0.567265	0.513184		0.375144	0.110077
ENSGALG00000002484	ENSGALG00000002484	CRYM	CRYM	chr14:14994377-15001501	ENSG00000103316	CRYM	chr16:21238874-21303083	12.2807	14.2364	12.4292	10.5641	13.9058	15.1892	11.1684	10.3061	11.5153	12.3746	11.918	13.5935		12.4568	1.5108
ENSGALG00000002485	ENSGALG00000002485	PHKG1	PHKG1	chr19:4883136-4888082	ENSG00000164776	PHKG1	chr7:56080283-56092996	41.7164	51.9685	51.3495	42.8724	48.2207	45.9383	44.1389	49.4406	71.0128	58.3384	45.3247	43.627		49.4957	8.25686
ENSGALG00000002486	ENSGALG00000002486	RNF123	RNF123	chr12:2318859-2360133	ENSG00000164068	RNF123	chr3:49689499-49721529	7.21457	8.95627	9.76185	6.30724	6.15844	8.58854	7.00609	8.96375	9.5199	8.7993	9.03883	6.8957		8.10087	1.28914
ENSGALG00000002487	ENSGALG00000002487	SFSWAP	SFSWAP	chr15:2791349-2832002	ENSG00000061936	SFSWAP	chr12:131711081-131799737	27.4516	26.8358	27.3443	26.2189	32.7461	29.683	25.5799	29.1843	31.5154	26.913	27.8036	25.0683		28.0287	2.33625
ENSGALG00000002488	ENSGALG00000002488	PAIP2	PAIP2	chr13:2443728-2451970	ENSG00000120727	PAIP2	chr5:139341587-139369720	190.649	245.106	219.854	221.636	261.674	193.67	218.967	225.717	252.139	215.185	186.7	194.772		218.839	24.7598
ENSGALG00000002489	ENSGALG00000002489	PPP1R26	PPP1R26	chr17:8195254-8199280	ENSG00000196422	PPP1R26	chr9:135479079-135488893	2.03226	1.75258	1.08938	2.15098	1.67214	1.52584	1.72368	1.04073	0.585409	0.699274	1.59421	1.82871		1.4746	0.506105
ENSGALG00000002490	ENSGALG00000002490	UQCRC2	UQCRC2	chr14:15001575-15015317	ENSG00000140740	UQCRC2	chr16:21952660-21983660	125.251	135.325	135.803	130.985	152.517	128.734	135.64	144.255	170.123	154.933	137.277	138.403		140.771	12.7644
ENSGALG00000002492	ENSGALG00000002492	H6PD	H6PD	chr21:3292835-3298662	ENSG00000049239	H6PD	chr1:9234775-9271337	3.08568	2.04631	1.52373	1.82893	1.12289	1.97697	2.07466	1.25435	0.812668	1.59715	3.312	3.35064		1.99883	0.846703
ENSGALG00000002495	ENSGALG00000002495	CHCHD2	CHCHD2	chr19:4888885-4892140	ENSG00000106153	CHCHD2	chr7:56101569-56106576	719.416	711.164	863.776	701.507	749.091	686.186	779.883	920.63	1222.57	1199.1	1020.92	826.309		866.713	188.919
ENSGALG00000002496	ENSGALG00000002496	-	SFTPA1	chr6:4475379-4477845	ENSG00000185303	SFTPA2	chr10:79555852-79560402	0.100813	0.129398	0	0	0.0647407	0	0	0.0512266	0	0	0.139622	0.117289		0.0502574	0.0577329
ENSGALG00000002497	ENSGALG00000002497	RHOT2	RHOT2	chr14:13181556-13192738	ENSG00000140983	RHOT2	chr16:668086-674174	45.7859	44.5288	36.6121	41.6243	35.9199	41.27	41.2691	46.2103	37.9151	37.4152	37.257	51.5396		41.4456	4.79752
ENSGALG00000002499	ENSGALG00000002499	-	ENSGALG00000002499	chr23:4362853-4396027	ENSG00000271741	AC114490.2	chr1:34981533-35031741	24.3336	22.8771	28.1016	19.9901	23.0721	37.5432	22.2997	27.768	17.5344	15.8745	15.7162	15.4254		22.5447	6.4681
ENSGALG00000002500	ENSGALG00000002500	GMPPB	GMPPB	chr12:2360211-2362343	ENSG00000173540	GMPPB	chr3:49716844-49723951	88.5428	91.3318	102.228	83.6231	116.04	90.6047	108.291	106.89	185.863	174.367	94.1223	142.123		115.336	34.1534
ENSGALG00000002501	ENSGALG00000002501	-	VKORC1L1	chr19:4892455-4902579				35.5859	32.5052	38.243	33.3347	31.7919	38.5634	36.186	33.1438	30.6384	30.2133	23.2768	30.3945		32.8231	4.17146
ENSGALG00000002503	ENSGALG00000002503	-	SFTPA2	chr6:4483867-4489399	ENSG00000185303	SFTPA2	chr10:79555852-79560402	0	0	0	0	0	0	0	0	0	0	0	0.0477282		0.00397735	0.0137779
ENSGALG00000002504	ENSGALG00000002504	TROVE2	TROVE2	chr8:3508643-3516114	ENSG00000116747	TROVE2	chr1:193059422-193091777	4.95796	4.29852	3.43255	3.24501	2.98662	4.98128	4.36189	2.99505	1.97031	1.86741	4.16355	2.43806		3.47485	1.081
ENSGALG00000002506	ENSGALG00000002506	SPSB1	SPSB1	chr21:3324989-3343536	ENSG00000171621	SPSB1	chr1:9292880-9369532	4.74622	3.65518	2.92965	4.39835	3.96234	3.48227	5.06825	3.3764	2.44792	3.17131	9.64089	5.29181		4.34755	1.88086
ENSGALG00000002507	ENSGALG00000002507	-	MBL2	chr6:4503080-4511262	ENSG00000165471	MBL2	chr10:52765380-52771700	0.0222248	0.0285264	0.0693144	0.0752741	0.0856345	0	0.0263697	0.0225863	0.0585328	0	0	0.0775708		0.0388361	0.0325597
ENSGALG00000002510	ENSGALG00000002510	IP6K1	IP6K1	chr12:2364945-2371200	ENSG00000176095	IP6K1	chr3:49724294-49786542	38.3729	46.7427	43.6443	36.4875	38.3992	39.3839	34.8653	42.5939	40.7804	35.9196	19.7359	40.093		38.0849	6.69908
ENSGALG00000002511	ENSGALG00000002511	SYCP1	SYCP1	chr26:3945332-3974291	ENSG00000198765	SYCP1	chr1:114854803-114995370	0.0984285	0.126337	0.0852716	0.0987769	0.112372	0.0135618	0.116785	0.0444576	0.0576064	0.086455	0.0454399	0.076343		0.0801529	0.0339734
ENSGALG00000002514	ENSGALG00000002514	SFPQ	SFPQ	chr23:4405778-4419940	ENSG00000116560	SFPQ	chr1:35176378-35193148	269.349	361.435	453.276	245.34	439.589	401.452	289.683	359.148	496.175	381.114	338.263	240.282		356.259	83.4981
ENSGALG00000002515	ENSGALG00000002515	OLFM1	OLFM1	chr17:8076098-8103052	ENSG00000130558	OLFM1	chr9:135075422-135121179	26.0742	30.7644	79.021	31.1568	36.5022	59.0112	25.9764	28.0278	66.3788	29.5696	34.003	23.9835		39.2057	18.2987
ENSGALG00000002517	ENSGALG00000002517	TMEM35B	TMEM35B	chr23:4424101-4424697	ENSG00000243749	TMEM35B	chr1:34981535-34985353	7.16148	6.36373	14.6037	5.90841	10.4362	9.73446	8.17028	7.97779	13.239	13.0645	11.635	9.77393		9.83904	2.84778
ENSGALG00000002519	ENSGALG00000002519	SLC25A33	SLC25A33	chr21:3374822-3413643	ENSG00000171612	SLC25A33	chr1:9539482-9585179	47.1536	47.5359	53.1532	56.0516	49.3562	54.7737	58.6877	53.991	66.8584	66.2267	55.9435	57.3117		55.5869	6.30351
ENSGALG00000002523	ENSGALG00000002523	CREB3	CREB3	chrZ:9168674-9172752	ENSG00000107175	CREB3	chr9:35732335-35737004	31.7886	26.7978	24.5877	28.5787	23.4413	32.6454	32.9509	28.0747	30.6451	28.7191	26.53	36.2839		29.2536	3.74282
ENSGALG00000002524	ENSGALG00000002524	UCHL5	UCHL5	chr8:3519709-3532436	ENSG00000116750	UCHL5	chr1:193012250-193060080	189.818	214.835	223.169	243.382	269.651	212.659	236.582	219.949	261.937	242.758	171.103	203.555		224.116	28.6406
ENSGALG00000002525	ENSGALG00000002525	RASGEF1A	RASGEF1A	chr6:4737995-4762047	ENSG00000198915	RASGEF1A	chr10:43194535-43266919	0.651709	1.01001	1.13919	0.920131	0.797314	1.07013	0.762518	0.793076	1.3681	1.14526	2.35494	0.863354		1.07298	0.45122
ENSGALG00000002527	ENSGALG00000002527	TMEM201	TMEM201	chr21:3417402-3489188	ENSG00000188807	TMEM201	chr1:9588922-9614873	22.3633	16.9747	12.2514	15.7138	10.2844	17.9329	17.2838	16.3671	9.57135	10.0135	10.3171	15.7722		14.5705	4.03116
ENSGALG00000002528	ENSGALG00000002528	DNAJC18	DNAJC18	chr13:2417659-2430010	ENSG00000170464	DNAJC18	chr5:139408588-139444491	50.0449	52.5829	50.3355	54.7184	60.8735	47.7815	54.1084	56.2438	60.6936	58.4302	79.4815	64.0936		57.449	8.50363
ENSGALG00000002529	ENSGALG00000002529	-	ENSGALG00000002529	chrZ:73104187-73137042	ENSG00000131844	MCCC2	chr5:71587288-71658704	8.7237	11.7662	13.7971	10.3442	15.0266	13.1729	10.2274	11.9708	16.5411	13.3909	14.572	7.57626		12.2591	2.66926
ENSGALG00000002531	ENSGALG00000002531	-	SF3B3	chr11:1780996-1810428	ENSG00000189091	SF3B3	chr16:70523788-70577670	221.904	194.237	177.138	197.219	190.035	223.773	203.812	190.016	178.73	174.928	116.014	178.917		187.227	27.7053
ENSGALG00000002532	ENSGALG00000002532	GJA4	GJA4	chr23:4460809-4463692	ENSG00000187513	GJA4	chr1:34792998-34795747	0.834458	1.2694	6.28937	0.750181	1.70686	3.87079	0.696725	1.94733	5.22969	1.88473	3.03904	0.952854		2.37262	1.86094
ENSGALG00000002536	ENSGALG00000002536	STX2	STX2	chr15:2926590-3223483	ENSG00000111450	STX2	chr12:130789600-130839266	19.7365	19.1588	21.8724	16.9989	23.8006	22.7254	19.3594	17.7716	11.6729	14.0647	17.1674	16.4039		18.3944	3.50487
ENSGALG00000002539	ENSGALG00000002539	KCNN2	KCNN2	chrZ:73269455-73338347	ENSG00000080709	KCNN2	chr5:114360945-114496500	2.39827	3.00227	2.53941	3.89427	4.069	2.99232	3.49546	2.8435	3.04117	1.45451	1.47623	2.46297		2.80578	0.816567
ENSGALG00000002542	ENSGALG00000002542	GUSB	GUSB	chr19:4907988-4918576	ENSG00000169919	GUSB	chr7:65960684-65982314	17.5755	19.9831	22.5895	18.3316	19.8879	21.8859	20.4676	21.3361	26.9303	23.04	10.7068	15.2918		19.8355	4.11668
ENSGALG00000002543	ENSGALG00000002543	CSGALNACT2	CSGALNACT2	chr6:4770392-4784692	ENSG00000169826	CSGALNACT2	chr10:43138486-43185308	9.51226	9.57437	11.5128	8.72377	9.77708	10.42	8.91102	9.1357	8.86566	8.97112	9.30664	8.53007		9.43671	0.835276
ENSGALG00000002544	ENSGALG00000002544	PCDH12	PCDH12	chr13:2380543-2389689	ENSG00000113555	PCDH12	chr5:141943585-141969741	1.27196	1.08434	0.843719	1.33957	1.23134	1.16531	1.05867	1.24441	1.22497	1.07197	0.644171	1.39148		1.13099	0.212043
ENSGALG00000002546	ENSGALG00000002546	COL5A1	COL5A1	chr17:7910287-8039020	ENSG00000130635	COL5A1	chr9:134641774-134844843	0.580867	0.578292	1.64902	0.386747	0.659966	1.26976	0.574332	0.919531	1.31407	0.79054	0.995284	0.25559		0.831167	0.413577
ENSGALG00000002548	ENSGALG00000002548	TLN1	TLN1	chrZ:9172913-9207118	ENSG00000137076	TLN1	chr9:35696948-35732395	20.1434	16.2854	18.4637	17.3099	14.2872	22.3028	19.4885	18.9714	18.3883	17.3431	16.4181	18.7372		18.1783	2.06553
ENSGALG00000002549	ENSGALG00000002549	RGS1	RGS1	chr8:3620500-3624059	ENSG00000090104	RGS1	chr1:192575727-192580031	0	0	0	0	0	0	0	0	0	0	0.0774736	0.0325406		0.00916785	0.0234568
ENSGALG00000002550	ENSGALG00000002550	TSHB	TSHB	chr26:3979887-3982784	ENSG00000134200	TSHB	chr1:115029824-115034309	0	0.141636	0	0	0	0	0.130928	0	0	0	0	0.128382		0.0334122	0.0605192
ENSGALG00000002551	ENSGALG00000002551	CFAP70	CFAP70	chr14:13130171-13153006	ENSG00000156042	CFAP70	chr10:73253759-73358859	0.150163	0.22888	0.131717	0.233106	0.204919	0.314228	0.189304	0.190758	0.2101	0.18018	0.441937	0.185623		0.221743	0.0830719
ENSGALG00000002553	ENSGALG00000002553	-	PCDH1	chr13:2037708-2061000	ENSG00000156453	PCDH1	chr5:141853111-141879246	43.9841	43.1324	32.3585	32.5601	22.4626	37.5241	57.3939	58.293	46.9657	64.3633	64.1772	40.7375		45.3294	13.405
ENSGALG00000002554	ENSGALG00000002554	TSPAN2	TSPAN2	chr26:3987670-4005550	ENSG00000134198	TSPAN2	chr1:115048011-115089500	0.587809	0.58886	2.39217	0.728369	0.773377	1.24448	0.57836	0.641081	1.9068	1.0524	2.22386	1.03415		1.14598	0.663113
ENSGALG00000002555	ENSGALG00000002555	RET	RET	chr6:4809010-4885036	ENSG00000165731	RET	chr10:43077027-43130351	2.23605	1.83978	3.02495	2.03899	1.77961	3.59598	1.63266	2.04907	2.26501	2.73023	6.16721	3.26853		2.71901	1.25195
ENSGALG00000002556	ENSGALG00000002556	NGF	NGF	chr26:4027895-4047968	ENSG00000134259	NGF	chr1:115285918-115338236	0.344289	0.401738	2.00558	0.565378	0.824207	0.863898	0.371364	0.3817	1.60742	0.671583	0.160956	0.109239		0.692279	0.57626
ENSGALG00000002557	ENSGALG00000002557	ADGRD1	ADGRD1	chr15:2926590-3223483	ENSG00000111452	ADGRD1	chr12:130953907-131141469	0.0361754	0	0.0376078	0.0272276	0.0309751	0.104671	0.0286147	0.0367639	0.0317581	0.0262228	0.0167005	0.0945524		0.0392724	0.0300871
ENSGALG00000002558	ENSGALG00000002558	-	ASL1	chr19:4932051-4939807	ENSG00000249319	AC068533.4	chr7:66087761-66152277	0.179071	0.263157	0.510895	0.248562	0.184431	0.405831	0.0774248	0.124779	1.02485	0.462067	0.287259	0.185786		0.329509	0.256255
ENSGALG00000002561	ENSGALG00000002561	-	ENSGALG00000002561	chr26:4080349-4082578	ENSG00000112039	FANCE	chr6:35452361-35467103	18.0036	17.002	25.5291	20.1678	20.6672	21.3999	17.7088	21.9463	39.3083	25.8097	16.0846	21.2715		22.0749	6.22942
ENSGALG00000002562	ENSGALG00000002562	ARAP3	ARAP3	chr13:1939271-1953501	ENSG00000120318	ARAP3	chr5:141653401-141682221	0.0957401	0.0614481	1.07515	0.0405277	0.0461058	0.341344	0.078094	0.187073	0.89923	0.482822	0.205598	0.0696133		0.298562	0.350252
ENSGALG00000002563	ENSGALG00000002563	TPM4	TPM4	chr28:4438749-4454984	ENSG00000167460	TPM4	chr19:16067021-16103005	156.663	222.337	249.957	179.441	345.838	226.115	172.531	223.536	361.821	265.436	214.216	163.715		231.801	66.3366
ENSGALG00000002564	ENSGALG00000002564	RGS4	RGS4	chr8:3687051-3692405	ENSG00000117152	RGS4	chr1:163068775-163076802	1.46495	0.581541	0.329711	0.988928	0.271561	0.206006	1.43353	0.460446	0.198876	0.306998	0.690242	2.19634		0.760761	0.635554
ENSGALG00000002569	ENSGALG00000002569	RAN	RAN	chr15:2926590-3223483	ENSG00000132341	RAN	chr12:130871879-130877678	1528.42	1636.94	1672.34	1752.35	1800.17	1642.12	1779	1794.89	2002.93	1792.2	1225.43	1575.37		1683.51	191.479
ENSGALG00000002570	ENSGALG00000002570	-	ENSGALG00000002570	chr13:1936310-1938756				0.94367	0.955016	1.21686	0.880993	0.769168	0.832638	0.64596	1.03279	1.50553	1.12718	1.00534	0.907873		0.985251	0.223961
ENSGALG00000002576	ENSGALG00000002576	ASL2	ASL2	chr19:4919233-4928185	ENSG00000249319	AC068533.4	chr7:66087761-66152277	1.22414	3.29353	11.7719	1.9053	2.47314	8.72164	3.62505	2.73414	22.4664	6.04847	0.949622	0.881207		5.50788	6.29801
ENSGALG00000002577	ENSGALG00000002577	-	ENSGALG00000002577	chr13:1958525-1963162	ENSG00000214530	STARD10	chr11:72754729-72794168	1.6523	0.771199	0.546549	1.4132	0.900313	0.310444	0.594077	0.763264	0.659337	0.678532	1.10952	2.09709		0.957985	0.519987
ENSGALG00000002578	ENSGALG00000002578	-	ENSGALG00000002578	chrZ:9221594-9225213				20.3466	18.4028	23.4264	16.2463	15.5712	20.8513	17.5118	19.1777	25.8908	21.3704	20.6599	19.563		19.9182	2.90507
ENSGALG00000002579	ENSGALG00000002579	RIMBP2	RIMBP2	chr15:3240515-3345753	ENSG00000060709	RIMBP2	chr12:130396137-130517917	0.502285	0.0645763	0.223906	0.400503	0.302525	0.36649	0.450291	0.274341	0.154582	0.230409	0.253465	0.321129		0.295375	0.123676
ENSGALG00000002581	ENSGALG00000002581	-	HTATIP2	chr8:3703919-3706342	ENSG00000109854	HTATIP2	chr11:20363685-20383783	12.5691	10.5215	14.4871	11.4482	12.322	11.6709	12.2476	8.70083	19.9897	13.3716	8.9141	15.0471		12.6075	3.01893
ENSGALG00000002583	ENSGALG00000002583	PIK3CD	PIK3CD	chr21:3417402-3489188	ENSG00000171608	PIK3CD	chr1:9651732-9729114	1.81318	0.984847	1.13953	1.25813	0.915092	1.51783	1.5986	1.30426	0.962282	2.26943	5.22478	1.36028		1.69569	1.17773
ENSGALG00000002587	ENSGALG00000002587	CRCP	CRCP	chr19:4944773-4972405	ENSG00000241258	CRCP	chr7:66114604-66154568	46.9118	48.0254	51.587	58.0783	66.2434	57.1935	56.302	56.8525	62.7795	62.9114	45.054	46.6603		54.8833	7.1539
ENSGALG00000002588	ENSGALG00000002588	PPARD	PPARD	chr26:4089637-4106262	ENSG00000112033	PPARD	chr6:35342558-35428191	45.0762	39.0499	19.482	43.5114	30.3092	20.2499	35.3197	40.8131	23.6366	37.9937	32.3893	62.0657		35.8247	11.9618
ENSGALG00000002591	ENSGALG00000002591	POLR2E	POLR2E	chr28:2945030-2960340	ENSG00000099817	POLR2E	chr19:1086579-1095380	318.938	367.692	389.253	343.802	378.986	374.947	338.725	393.939	551.403	446.202	391.802	373.798		389.124	60.4084
ENSGALG00000002594	ENSGALG00000002594	TFPI	TFPI	chr7:1055958-1083282	ENSG00000003436	TFPI	chr2:187464230-187565760	0.190021	0.243846	0.434898	0.250966	0.188792	0.392636	0.225408	0.193069	0.500397	0.143029	0.219272	0.384785		0.280593	0.115908
ENSGALG00000002595	ENSGALG00000002595	GPX4	GPX4	chr28:2960446-2961818	ENSG00000167468	GPX4	chr19:1103926-1106791	613.505	644.258	738.482	625.353	798.408	679.989	698.92	690.602	1097.58	935.834	789.738	829.741		761.867	141.568
ENSGALG00000002597	ENSGALG00000002597	MSS51	MSS51	chr14:13126747-13129142	ENSG00000166343	MSS51	chr10:73423579-73433561	1.11737	0.956131	0.746755	1.17139	0.85424	0.692798	0.946974	0.540739	0.980934	0.901332	0.773761	1.23808		0.910042	0.204365
ENSGALG00000002598	ENSGALG00000002598	TPST1	TPST1	chr19:4980961-5005598	ENSG00000169902	TPST1	chr7:66205199-66420543	62.9892	59.7172	68.0384	56.4876	58.1092	58.9563	65.5037	58.4006	76.0959	58.3184	34.9523	50.5316		59.0084	9.95729
ENSGALG00000002599	ENSGALG00000002599	ARHGEF39	ARHGEF39	chrZ:9259341-9296314	ENSG00000137135	ARHGEF39	chr9:35658875-35675866	10.5365	11.0627	10.4821	14.0372	9.45441	11.8384	14.8013	13.2015	14.6351	14.3207	16.5631	14.9693		12.9919	2.24488
ENSGALG00000002603	ENSGALG00000002603	-	COG4	chr11:1810718-1825379	ENSG00000103051	COG4	chr16:70480568-70523565	22.3931	30.2764	26.2448	21.9326	23.1651	22.662	20.2912	23.3757	27.1845	22.1476	22.8877	25.6988		24.0216	2.78977
ENSGALG00000002605	ENSGALG00000002605	MRPL17	MRPL17	chrZ:9297782-9298741	ENSG00000158042	MRPL17	chr11:6680782-6683401	182.761	172.279	195.305	197.312	178.916	182.59	213.217	176.409	315.692	254.023	201.947	243.218		209.472	42.2888
ENSGALG00000002606	ENSGALG00000002606	CLSTN1	CLSTN1	chr21:3489329-3523996	ENSG00000171603	CLSTN1	chr1:9729026-9824526	54.6217	49.8501	50.2748	45.8897	54.1063	53.3233	45.1886	45.2969	34.0011	35.3598	52.4429	42.9082		46.9386	6.9126
ENSGALG00000002610	ENSGALG00000002610	-	ENSGALG00000002610	chr14:13122958-13125997				1.33453	1.61216	1.53019	1.10784	1.96609	0.973458	1.53685	2.23381	2.63604	4.43265	11.0896	2.55727		2.75087	2.78669
ENSGALG00000002612	ENSGALG00000002612	U2SURP	U2SURP	chr9:10631745-10674055	ENSG00000163714	U2SURP	chr3:142964497-143060546	55.8103	62.0647	71.3684	59.1508	77.6207	60.4002	60.6781	69.311	76.8498	62.9671	55.9971	52.8985		63.7597	8.19717
ENSGALG00000002615	ENSGALG00000002615	DEF6	DEF6	chr26:4108744-4120177	ENSG00000023892	DEF6	chr6:35297852-35321771	20.2824	15.2406	6.55609	21.532	17.7376	8.57853	18.0487	10.6169	9.12655	8.30166	4.76406	29.9262		14.2259	7.50094
ENSGALG00000002616	ENSGALG00000002616	LZIC	LZIC	chr21:3569312-3578058	ENSG00000162441	LZIC	chr1:9922113-9943407	35.0123	34.1622	33.2957	36.5672	37.6378	33.169	37.2768	32.0558	32.3584	32.4754	33.5372	35.2304		34.3982	1.94057
ENSGALG00000002618	ENSGALG00000002618	KCTD7	KCTD7	chr19:5008444-5015244	ENSG00000243335	KCTD7	chr7:66628767-66649067	15.0611	12.1708	13.4849	14.0189	15.6073	14.1582	14.1247	12.014	12.893	15.6248	23.6827	11.9857		14.5688	3.14932
ENSGALG00000002621	ENSGALG00000002621	SLC25A42	SLC25A42	chr28:3655929-3662852	ENSG00000181035	SLC25A42	chr19:19063999-19112888	3.22115	2.95319	1.37536	2.55429	2.36408	2.33005	1.77445	2.29928	0.858445	2.20859	4.03629	3.88142		2.48805	0.936807
ENSGALG00000002622	ENSGALG00000002622	FCHSD1	FCHSD1	chr13:1930226-1934679	ENSG00000197948	FCHSD1	chr5:141639302-141651419	8.59572	8.66725	7.50325	7.5315	9.61555	8.81851	7.52815	6.97849	11.4051	8.76783	7.97414	9.82972		8.60127	1.24342
ENSGALG00000002623	ENSGALG00000002623	PCOLCE2	PCOLCE2	chr9:10574022-10593642	ENSG00000163710	PCOLCE2	chr3:142815922-142889203	15.7671	14.4555	12.1795	16.3807	20.2884	15.0177	14.508	13.4967	11.3637	11.6615	10.7361	15.4851		14.2783	2.65862
ENSGALG00000002624	ENSGALG00000002624	BMS1	BMS1	chr6:5071453-5092701	ENSG00000165733	BMS1	chr10:42782801-42834937	105.923	95.2026	90.1369	106.128	125.891	71.0098	100.725	88.3911	82.8458	74.2992	62.1963	85.3538		90.6752	17.5655
ENSGALG00000002630	ENSGALG00000002630	ZNF76	ZNF76	chr26:4121871-4130083	ENSG00000065029	ZNF76	chr6:35258909-35295985	8.27144	6.78027	4.61482	8.77032	4.56111	5.13765	7.84773	5.03758	4.85178	5.43083	3.79122	9.9331		6.25232	1.99414
ENSGALG00000002631	ENSGALG00000002631	LRRC75A	LRRC75A	chr19:5071177-5115971	ENSG00000181350	LRRC75A	chr17:16441577-16492153	5.87211	4.28142	3.30516	5.88418	3.57016	4.13634	3.29811	2.61305	1.09812	2.90371	10.8275	6.34668		4.51138	2.50169
ENSGALG00000002632	ENSGALG00000002632	CALCRL	CALCRL	chr7:1088698-1148350	ENSG00000064989	CALCRL	chr2:187343129-187448460	6.23638	2.95489	0.241115	4.69384	1.87558	0.660428	4.89221	1.79834	0.0904937	0.329829	0.0713814	3.6178		2.28852	2.1574
ENSGALG00000002634	ENSGALG00000002634	HDAC3	HDAC3	chr13:1905649-1919540	ENSG00000171720	HDAC3	chr5:141620876-141636870	61.5747	67.2825	52.215	63.8448	53.8968	51.262	58.4738	60.6325	56.8544	54.4027	60.555	82.304		60.2748	8.44947
ENSGALG00000002637	ENSGALG00000002637	RBP7	RBP7	chr21:3587309-3589014	ENSG00000162444	RBP7	chr1:9997206-10016020	1.33099	0.379639	0.230615	0.333924	0.759768	0.183387	0.526405	0.450879	0	1.33609	0.614455	1.20439		0.612545	0.455505
ENSGALG00000002638	ENSGALG00000002638	-	ENSGALG00000002638	chr6:5116740-5163888				0.12767	0.116964	0.265448	0.180042	0.27329	0.0527723	0.0540134	0.0462639	0.112079	0.188987	0.599449	0.0530075		0.172499	0.156305
ENSGALG00000002639	ENSGALG00000002639	TRPC1	TRPC1	chr9:10547996-10568737	ENSG00000144935	TRPC1	chr3:142724074-142807888	5.10399	4.51907	3.40595	3.43718	3.87109	5.23835	4.61573	2.81605	3.28533	2.32993	3.39189	3.84463		3.8216	0.894467
ENSGALG00000002643	ENSGALG00000002643	-	ENSGALG00000002643	chr8:3712266-3717579				0.0195693	0.0502361	0.0305163	0.0220934	0.0502685	0.0970674	0.046438	0.0198877	0.0257696	0.0662996	0	0.0227675		0.0375761	0.0260445
ENSGALG00000002644	ENSGALG00000002644	RPL10A	RPL10A	chr26:4130723-4134398	ENSG00000198755	RPL10A	chr6:35468408-35470785	5054.74	5828.01	6008.47	5726.8	7224.3	5788.53	6416.71	6753.67	8913.25	7657.85	4789.33	5251.46		6284.43	1189.88
ENSGALG00000002645	ENSGALG00000002645	-	PIWIL1	chr15:3348419-3365105	ENSG00000184571	PIWIL3	chr22:24719034-24774720	3.52457	1.79039	1.32064	3.43081	2.54335	1.83782	3.20661	1.96182	0.803615	1.67371	1.4144	2.62264		2.17753	0.881429
ENSGALG00000002646	ENSGALG00000002646	FAM171B	FAM171B	chr7:1282402-1313156	ENSG00000144369	FAM171B	chr2:186693971-186765965	9.27012	14.5195	21.8399	9.00907	13.8048	25.4607	7.98169	13.7622	14.4837	9.03999	6.50613	7.41841		12.758	5.89667
ENSGALG00000002647	ENSGALG00000002647	PLS1	PLS1	chr9:10508599-10546820	ENSG00000120756	PLS1	chr3:142596387-142713664	0.504132	0.616978	0.621587	0.735354	0.530806	0.392535	0.584222	0.442655	0.432269	0.31775	1.08786	0.861627		0.593981	0.216359
ENSGALG00000002648	ENSGALG00000002648	FUK	FUK	chr11:1825435-1839959	ENSG00000157353	FUK	chr16:70454421-70480274	9.36314	9.10821	6.62627	8.04715	7.78693	7.26977	8.65729	8.00455	7.90047	8.06141	7.11173	14.0706		8.50063	1.92197
ENSGALG00000002649	ENSGALG00000002649	UBE4B	UBE4B	chr21:3592012-3626351	ENSG00000130939	UBE4B	chr1:10032832-10181239	24.1893	26.3906	24.1327	20.4992	18.4849	29.0097	20.8596	24.3366	12.294	14.2247	19.409	19.008		21.0699	4.85301
ENSGALG00000002651	ENSGALG00000002651	ST3GAL2	ST3GAL2	chr11:1825435-1839959	ENSG00000157350	ST3GAL2	chr16:70375978-70439237	12.8867	17.7139	19.4189	9.67341	11.9889	15.1599	13.4964	18.2764	20.6931	22.0068	18.9743	14.096		16.1987	3.84582
ENSGALG00000002652	ENSGALG00000002652	-	ENSGALG00000002652	chr15:3443119-3444876	ENSG00000111432	FZD10	chr12:130162459-130165740	0	0	0	0	0	0	0.0238737	0	0	0	0	0		0.00198948	0.00689174
ENSGALG00000002653	ENSGALG00000002653	NCBP3	NCBP3	chr19:5130009-5145174	ENSG00000074356	NCBP3	chr17:3802165-3846251	9.18062	11.1026	10.967	9.57551	10.8285	10.0997	9.48373	9.4926	9.86006	8.93151	10.2418	9.25033		9.91783	0.733822
ENSGALG00000002655	ENSGALG00000002655	ITGAV	ITGAV	chr7:1319203-1364895	ENSG00000138448	ITGAV	chr2:186590065-186680901	4.49693	1.35536	0.482637	3.05231	1.11071	1.20783	4.10428	1.47093	0.21577	1.87099	2.89969	5.23182		2.2916	1.64096
ENSGALG00000002656	ENSGALG00000002656	CRK	CRK	chr19:5149077-5161738	ENSG00000167193	CRK	chr17:1420689-1463162	44.7648	37.3609	35.9635	35.8992	39.4814	43.6287	40.4537	38.8273	27.0659	26.6592	26.0381	36.1154		36.0215	6.34714
ENSGALG00000002659	ENSGALG00000002659	WDR5	WDR5	chr17:7671911-7683692	ENSG00000196363	WDR5	chr9:134135365-134159968	180.958	179.493	175.965	197.317	198.799	192.741	198.71	189.627	199.604	185.84	147.628	176.784		185.289	14.8228
ENSGALG00000002661	ENSGALG00000002661	YWHAE	YWHAE	chr19:5167611-5187555	ENSG00000108953	YWHAE	chr17:1344272-1400378	709.983	714.66	764.655	772.632	876.878	696.82	794.853	777.103	887.825	854.847	681.204	695.715		768.931	72.999
ENSGALG00000002663	ENSGALG00000002663	ATR	ATR	chr9:10472557-10508150	ENSG00000175054	ATR	chr3:142449235-142578826	5.54801	4.1165	5.0942	5.44753	4.7872	5.68785	5.17839	5.03212	3.66997	3.54229	2.66573	3.5257		4.52462	0.983769
ENSGALG00000002666	ENSGALG00000002666	RAB11FIP3	RAB11FIP3	chr14:13067177-13107546	ENSG00000090565	RAB11FIP3	chr16:425619-523011	22.2834	26.2385	26.6174	19.9984	25.1102	26.3911	20.8608	23.7343	23.7816	20.2639	21.9708	22.7756		23.3355	2.37449
ENSGALG00000002667	ENSGALG00000002667	OLFML2B	OLFML2B	chr8:3792798-3798695	ENSG00000162745	OLFML2B	chr1:161983192-162023854	1.6356	1.98008	2.26071	1.55279	1.50392	1.7286	1.34522	1.37888	1.61537	1.76315	2.31673	2.16239		1.77029	0.334792
ENSGALG00000002671	ENSGALG00000002671	TMEM132D	TMEM132D	chr15:3525978-3717176	ENSG00000151952	TMEM132D	chr12:129071725-129903666	0.299604	0.29581	0.131774	0.338247	0.266401	0.228629	0.255216	0.163949	0.212439	0.242915	0.925634	0.491569		0.321016	0.211114
ENSGALG00000002673	ENSGALG00000002673	GRPEL2	GRPEL2	chr13:8517216-8519938	ENSG00000164284	GRPEL2	chr5:149345430-149354583	29.2263	25.8058	16.327	26.1067	21.5325	25.2499	26.7509	20.0405	7.02059	11.9691	14.8565	32.1345		21.4184	7.55358
ENSGALG00000002675	ENSGALG00000002675	SCUBE3	SCUBE3	chr26:4137687-4165193	ENSG00000146197	SCUBE3	chr6:35214419-35253079	1.51321	1.38936	3.04865	1.45899	1.40444	3.53375	0.969789	1.73987	2.8508	2.07062	2.53936	1.22079		1.9783	0.823494
ENSGALG00000002678	ENSGALG00000002678	CSPG4	CSPG4	chr10:2637607-2655172	ENSG00000173546	CSPG4	chr15:75674322-75712848	0.043848	0.0675368	0.0820515	0.0247518	0.0506853	0.190307	0.0208102	0.0980347	0.0750628	0.0940842	0.0668005	0.0153042		0.0691064	0.0472258
ENSGALG00000002679	ENSGALG00000002679	GLT1D1	GLT1D1	chr15:3736273-3781857	ENSG00000151948	GLT1D1	chr12:128853427-128984968	10.9412	12.0492	17.3327	13.2601	17.1366	16.653	12.1824	14.0011	14.7369	14.1229	10.5335	11.756		13.7255	2.3684
ENSGALG00000002682	ENSGALG00000002682	BRD3	BRD3	chr17:7634706-7650589	ENSG00000169925	BRD3	chr9:134030305-134068535	4.92277	3.306	1.61611	4.80063	3.07324	2.00332	5.56961	3.11323	1.68585	3.25299	4.89703	5.46131		3.64184	1.4481
ENSGALG00000002683	ENSGALG00000002683	DECR2	DECR2	chr14:13060628-13066422	ENSG00000242612	DECR2	chr16:401826-412487	67.2779	78.9598	75.5307	63.804	72.9566	69.7072	63.072	67.445	91.5257	76.7957	82.0291	85.3551		74.5382	8.85688
ENSGALG00000002686	ENSGALG00000002686	ECD	ECD	chr6:5191254-5199572	ENSG00000122882	ECD	chr10:73130155-73169055	53.6448	51.9878	44.4502	53.9701	52.7226	53.8789	52.5918	49.3819	54.7409	49.3831	40.4979	55.8531		51.0919	4.53726
ENSGALG00000002688	ENSGALG00000002688	NME4	NME4	chr14:13010219-13060617	ENSG00000103202	NME4	chr16:396725-410367	2.65e-202	0.182926	6.03e-172	3.9e-167	2.96e-128	0	3.46e-190	3.56e-174	7.51e-141	1.52e-125	2.79e-137	8.16e-158		0.0152438	0.0528062
ENSGALG00000002689	ENSGALG00000002689	-	ENSGALG00000002689	chr7:2224674-2232347	ENSG00000163002	NUP35	chr2:183117513-183161680	51.1123	56.887	54.9771	53.8027	47.7221	55.3255	48.9959	53.1908	61.5835	52.5478	50.1412	56.6557		53.5785	3.86077
ENSGALG00000002690	ENSGALG00000002690	PDPR	PDPR	chr11:1843313-1860236	ENSG00000090857	PDPR	chr16:70113626-70162537	10.5752	10.0025	12.5746	9.25672	7.81112	14.2587	9.27549	10.4094	9.24066	8.35573	8.93439	9.0665		9.98008	1.81945
ENSGALG00000002692	ENSGALG00000002692	-	ENSGALG00000002692	chr26:4177680-4185200	ENSG00000124678	TCP11	chr6:35118071-35148610	3.12159	2.4234	2.66943	3.04106	2.58663	2.34128	2.53887	2.94212	1.69066	1.6489	2.12677	3.22171		2.52937	0.519842
ENSGALG00000002693	ENSGALG00000002693	FAM149B1	FAM149B1	chr6:5199679-5211020	ENSG00000138286	FAM149B1	chr10:73168166-73244504	7.66753	5.69902	4.18921	5.87632	4.45674	5.29769	5.55591	4.51231	2.8006	3.37091	4.2632	6.0122		4.97514	1.31466
ENSGALG00000002695	ENSGALG00000002695	SLC15A4	SLC15A4	chr15:3785407-3805577	ENSG00000139370	SLC15A4	chr12:128793191-128823983	11.9202	12.1987	11.8898	10.8511	7.14927	12.1627	11.6162	9.69496	8.62629	10.2478	10.312	9.49545		10.5137	1.57999
ENSGALG00000002699	ENSGALG00000002699	VAV2	VAV2	chr17:7524632-7622902	ENSG00000160293	VAV2	chr9:133761894-133992604	47.7229	44.7795	27.9947	48.8547	36.8992	31.0117	41.1689	41.1386	26.487	36.9021	39.4703	47.3442		39.1478	7.60256
ENSGALG00000002701	ENSGALG00000002701	DNAJC9	DNAJC9	chr6:5213319-5216438	ENSG00000213551	DNAJC9	chr10:73183362-73248862	80.8871	75.6281	83.0613	92.2452	115.569	78.5922	79.5857	77.0436	103.199	91.6627	108.621	96.6875		90.2319	13.3853
ENSGALG00000002703	ENSGALG00000002703	TFAM	TFAM	chr6:5216874-5221892	ENSG00000108064	TFAM	chr10:58385022-58399221	231.642	247.02	264.284	260.116	310.554	238.983	259.932	248.461	325.853	274.526	218.581	235.62		259.631	31.5904
ENSGALG00000002705	ENSGALG00000002705	CISD1	CISD1	chr6:5238390-5248079	ENSG00000122873	CISD1	chr10:58269058-58289586	57.1128	63.613	61.2725	57.409	66.0893	59.9573	63.657	60.1346	64.6137	67.8177	74.3573	58.4757		62.8758	4.97091
ENSGALG00000002706	ENSGALG00000002706	XRN1	XRN1	chr9:10439332-10471471	ENSG00000114127	XRN1	chr3:142306607-142448062	6.85009	6.57923	5.66109	5.68766	5.83775	8.99624	6.2836	6.8602	2.16244	2.56318	3.2084	3.45258		5.3452	2.06201
ENSGALG00000002707	ENSGALG00000002707	CHRNB2	CHRNB2	chr25:1729682-1734477	ENSG00000160716	CHRNB2	chr1:154567781-154580026	0.511614	0.44654	0.382947	0.50829	0.499397	0.58367	0.82556	0.686316	0.70066	2.65775	3.37277	0.73808		0.992799	0.965585
ENSGALG00000002708	ENSGALG00000002708	LINGO1	LINGO1	chr10:2667331-2767927	ENSG00000169783	LINGO1	chr15:77613027-77820900	1.41846	0.747767	1.7972	1.20106	0.959712	1.74325	1.2322	1.13263	1.40091	2.63166	10.8399	3.109		2.35115	2.75891
ENSGALG00000002709	ENSGALG00000002709	MYO1C	MYO1C	chr19:5189499-5240189	ENSG00000197879	MYO1C	chr17:1464098-1492812	28.392	21.0508	19.4934	24.2725	20.6806	25.7138	27.356	25.7166	16.4828	19.3731	21.4055	25.4988		22.953	3.69614
ENSGALG00000002710	ENSGALG00000002710	IPMK	IPMK	chr6:5253420-5283874	ENSG00000151151	IPMK	chr10:58191517-58267934	11.7416	8.1106	6.63902	9.51194	8.92167	7.30782	11.379	7.53755	4.36705	5.84548	8.25494	12.6177		8.51953	2.46981
ENSGALG00000002714	ENSGALG00000002714	TMEM132C	TMEM132C	chr15:3832160-4010395	ENSG00000181234	TMEM132C	chr12:128267403-128707915	1.21331	1.84161	0.991062	1.18499	2.36224	2.28072	0.765497	1.55599	0.646701	1.08746	0.840194	0.257673		1.25229	0.646208
ENSGALG00000002719	ENSGALG00000002719	CSNK1D	CSNK1D	chr18:4897329-4918534	ENSG00000141551	CSNK1D	chr17:82239023-82273731	55.9971	48.1979	46.7148	52.9876	52.4601	58.0645	56.5535	49.0822	44.8983	38.944	29.5908	49.5465		48.5864	8.06133
ENSGALG00000002722	ENSGALG00000002722	MST1	MST1	chr12:2456732-2465055	ENSG00000173531	MST1	chr3:49683947-49689501	3.20294	1.63373	2.44666	1.86677	1.14485	1.24785	2.15655	1.53517	2.53402	2.16921	2.85254	1.30996		2.00835	0.664148
ENSGALG00000002723	ENSGALG00000002723	ANKS1A	ANKS1A	chr26:4191372-4271977	ENSG00000064999	ANKS1A	chr6:34889265-35091413	3.04896	3.64769	3.13543	2.38439	1.74561	2.83994	2.58136	3.4868	1.79707	2.54606	3.66636	3.17796		2.83814	0.649823
ENSGALG00000002725	ENSGALG00000002725	UAP1	UAP1	chr8:3823062-3827259	ENSG00000117143	UAP1	chr1:162561506-162599842	28.3769	36.521	38.0486	27.1926	31.9031	37.9104	26.8287	32.5487	46.8199	36.1846	25.2346	28.547		33.0097	6.30908
ENSGALG00000002726	ENSGALG00000002726	KIF1B	KIF1B	chr21:3630054-3710113	ENSG00000054523	KIF1B	chr1:10210805-10381603	20.6457	14.0358	10.0457	15.3805	12.8779	18.2843	16.0718	14.8216	4.30264	5.79641	9.72059	12.9293		12.9094	4.79407
ENSGALG00000002728	ENSGALG00000002728	SLC16A3	SLC16A3	chr18:4923166-4932003	ENSG00000141526	SLC16A3	chr17:82228397-82261129	16.5266	10.6632	10.0965	18.1241	11.5244	10.5035	15.9782	11.898	8.38977	11.7023	7.53401	25.178		13.1765	4.97104
ENSGALG00000002729	ENSGALG00000002729	GK5	GK5	chr9:10392752-10431361	ENSG00000175066	GK5	chr3:142157527-142225607	5.82043	5.83724	6.84771	4.9452	7.37986	6.94561	6.0362	5.24259	5.78283	4.28104	2.68487	2.85739		5.38841	1.49675
ENSGALG00000002734	ENSGALG00000002734	UHMK1	UHMK1	chr8:3827709-3841196	ENSG00000152332	UHMK1	chr1:162497251-162529629	31.7164	32.736	30.2631	30.9232	31.3023	29.5272	32.1054	28.9503	34.4183	30.3606	32.8777	35.3996		31.715	1.92119
ENSGALG00000002735	ENSGALG00000002735	-	TAF11	chr26:4272573-4276039	ENSG00000284439	AC106774.9	chr5:17518367-17518963	61.1319	62.1111	71.19	65.6501	87.6384	64.7127	63.1728	68.7109	90.6392	88.8142	103.476	81.2784		75.7105	14.094
ENSGALG00000002739	ENSGALG00000002739	INPP5K	INPP5K	chr19:5245125-5276310	ENSG00000132376	INPP5K	chr17:1494571-1516888	12.0899	11.7196	18.0042	10.8277	13.1156	14.6689	12.289	13.206	16.395	16.3026	14.2171	9.12448		13.4967	2.55039
ENSGALG00000002742	ENSGALG00000002742	TMEM132B	TMEM132B	chr15:4292352-4478144	ENSG00000139364	TMEM132B	chr12:125186836-125662377	0.680913	0.437212	0.281756	0.730702	0.33125	0.650134	0.404227	0.39277	0.326758	0.237839	0.406571	0.701941		0.465173	0.17656
ENSGALG00000002744	ENSGALG00000002744	PCDH15	PCDH15	chr6:6330203-6628545	ENSG00000150275	PCDH15	chr10:53802771-55627942	0.904275	0.905139	0.555507	1.02299	1.07292	0.601396	0.966395	0.748163	0.331836	0.42936	1.18292	0.671128		0.782669	0.268314
ENSGALG00000002750	ENSGALG00000002750	NCKAP1	NCKAP1	chr7:2252337-2303003	ENSG00000061676	NCKAP1	chr2:182909115-183038858	88.8091	75.9733	73.838	79.2038	69.3376	96.1688	78.7386	77.9726	44.258	51.8791	60.156	67.6046		71.995	14.6473
ENSGALG00000002755	ENSGALG00000002755	-	ENSGALG00000002755	chr11:1924630-1926769	ENSG00000168411	RFWD3	chr16:74621394-74666881	15.8794	18.4094	20.147	13.9436	15.7897	14.8213	11.4801	16.6004	20.8356	15.7474	27.2736	20.7921		17.6433	4.16227
ENSGALG00000002756	ENSGALG00000002756	TMEM121	TMEM121	chr8:3887284-3890882	ENSG00000184986	TMEM121	chr14:105526603-105530202	4.45758	3.46688	5.75361	4.2353	3.59383	3.94047	3.78079	3.27423	4.67268	3.82783	8.47187	5.90494		4.615	1.47517
ENSGALG00000002759	ENSGALG00000002759	PEAK1	PEAK1	chr10:2987919-3016419	ENSG00000173517	PEAK1	chr15:77100656-77420144	4.98495	3.20301	3.02045	3.09904	3.03719	7.43408	3.58826	4.37165	1.08754	1.58352	1.89262	1.99773		3.275	1.7286
ENSGALG00000002761	ENSGALG00000002761	SIRT1	SIRT1	chr6:6640857-6662304	ENSG00000096717	SIRT1	chr10:67884669-67918390	20.5815	23.6579	21.6589	17.6763	20.341	23.9241	19.0965	19.2299	16.5852	19.2061	32.7037	17.4943		21.013	4.33207
ENSGALG00000002762	ENSGALG00000002762	UHRF1BP1	UHRF1BP1	chr26:4279918-4293167	ENSG00000065060	UHRF1BP1	chr6:34792015-34883138	4.683	4.96057	5.29755	4.67666	5.36725	7.95423	4.94959	5.52391	3.81934	2.78867	3.32889	3.2129		4.71355	1.37246
ENSGALG00000002763	ENSGALG00000002763	FRZB	FRZB	chr7:2312659-2328060	ENSG00000162998	FRZB	chr2:182833275-182867162	11.5244	19.8385	30.2922	10.7163	17.7812	23.9077	9.25775	14.5409	20.9804	14.4701	22.2259	16.1442		17.64	6.13407
ENSGALG00000002764	ENSGALG00000002764	ATP1B3	ATP1B3	chr9:10307409-10329985	ENSG00000069849	ATP1B3	chr3:141876124-141926514	196.172	201.092	179.003	204.36	200.001	181.857	217.828	193.084	164.798	183.428	132.413	187.231		186.772	21.9829
ENSGALG00000002765	ENSGALG00000002765	NBR1	NBR1	chr27:5594510-5612269	ENSG00000188554	NBR1	chr17:43170481-43211689	28.9339	29.2371	26.5004	27.3393	25.9954	30.1007	27.4118	28.3208	19.8291	19.8068	22.6691	23.669		25.8178	3.54056
ENSGALG00000002766	ENSGALG00000002766	MLKL	MLKL	chr11:1946272-1950045	ENSG00000168404	MLKL	chr16:74671855-74700960	0.0733656	0.0627785	0.0381353	0.055219	0	0.0303256	0.116064	0	0.0322035	0.138088	0.474173	0.142259		0.0968843	0.128191
ENSGALG00000002769	ENSGALG00000002769	DNAJC12	DNAJC12	chr6:6666080-6675111	ENSG00000108176	DNAJC12	chr10:67796665-67838166	2.556	2.29404	2.81704	2.95077	2.37532	2.46324	2.37142	2.26556	2.63193	2.35239	3.91258	2.77249		2.6469	0.456024
ENSGALG00000002771	ENSGALG00000002771	-	CRIP1	chr8:4002527-4005892	ENSG00000213145	CRIP1	chr14:105486317-105488947	5.95101	8.93698	9.4751	7.07186	8.64329	7.89197	7.13972	5.78515	9.50063	8.80568	7.44628	10.2866		8.07786	1.43173
ENSGALG00000002773	ENSGALG00000002773	SNRPC	SNRPC	chr26:4305762-4310425	ENSG00000124562	SNRPC	chr6:34757406-34773794	287.179	311.309	328.151	315.453	338.972	316.606	324.11	359.822	450.659	389.846	316.069	323.117		338.441	43.8059
ENSGALG00000002774	ENSGALG00000002774	TSPAN3	TSPAN3	chr10:3039542-3065075	ENSG00000140391	TSPAN3	chr15:77041404-77083984	209.257	206.748	205.215	222.708	208.819	188.945	210.323	193.12	193.113	226.395	228.47	212.611		208.81	12.8283
ENSGALG00000002775	ENSGALG00000002775	FA2H	FA2H	chr11:1951909-1959249	ENSG00000103089	FA2H	chr16:74712955-74774831	12.0707	9.33966	8.99403	13.188	8.03292	9.83797	12.0119	7.79056	7.40277	13.1094	104.787	19.3663		18.8276	27.2736
ENSGALG00000002781	ENSGALG00000002781	BRCA1	BRCA1	chr27:5573535-5593894	ENSG00000012048	BRCA1	chr17:43044295-43170245	20.7553	22.7196	27.1488	19.2385	23.5894	28.783	19.4155	23.4865	19.4193	17.9237	19.6103	16.1807		21.5225	3.73854
ENSGALG00000002783	ENSGALG00000002783	SLC43A2	SLC43A2	chr19:5308462-5317811	ENSG00000167703	SLC43A2	chr17:1569267-1628886	78.4284	43.5213	19.4004	64.5023	27.7634	32.7794	89.3886	51.533	19.5823	41.5449	46.4964	74.1912		49.0943	23.2105
ENSGALG00000002784	ENSGALG00000002784	-	APEH	chr12:2465248-2469863	ENSG00000164062	APEH	chr3:49674002-49683963	11.4166	13.6111	12.5037	12.8692	10.3541	11.6703	14.2193	13.8787	17.1033	17.4972	19.0886	15.0502		14.1052	2.66032
ENSGALG00000002786	ENSGALG00000002786	PSTPIP1	PSTPIP1	chr10:3074080-3118760	ENSG00000140368	PSTPIP1	chr15:76993359-77037332	0.0588498	0	0.045885	0	0	0	0.0349126	0	0	0	0	0		0.0116373	0.0216638
ENSGALG00000002789	ENSGALG00000002789	-	ENSGALG00000002789	chr7:2491966-2552621	ENSG00000078018	MAP2	chr2:209424058-209734118	7.04222	3.42777	1.96813	5.38985	3.05409	4.2189	6.57596	3.97805	1.92695	5.06091	12.1852	9.87431		5.39186	3.11743
ENSGALG00000002790	ENSGALG00000002790	ABLIM3	ABLIM3	chr13:8543268-8558770	ENSG00000173210	ABLIM3	chr5:149141483-149260542	0.324192	0.0438015	0.186253	0.385271	0.131489	0.126952	0.263184	0.138723	0.179751	0.269768	0.354469	0.476431		0.240024	0.127366
ENSGALG00000002792	ENSGALG00000002792	SPDEF	SPDEF	chr26:4355983-4357800	ENSG00000124664	SPDEF	chr6:34537802-34556333	1.74307	1.31943	2.64844	0.706424	0.91846	0.942186	1.06059	3.63369	2.64847	12.5679	47.2294	3.63989		6.58816	13.199
ENSGALG00000002797	ENSGALG00000002797	PGD	PGD	chr21:3715689-3725383	ENSG00000142657	PGD	chr1:10398592-10420144	57.5856	54.4948	68.5068	59.0047	63.0255	63.3382	62.3955	59.7956	81.8284	71.6519	51.1613	54.8288		62.3014	8.46985
ENSGALG00000002798	ENSGALG00000002798	WDR59	WDR59	chr11:1960585-2009093	ENSG00000103091	WDR59	chr16:74871367-75000173	9.65957	9.01919	10.0482	8.72457	8.17741	9.59245	8.74008	10.1109	10.7406	9.2284	18.7632	11.3658		10.3475	2.79851
ENSGALG00000002800	ENSGALG00000002800	GRK7	GRK7	chr9:10271682-10289497	ENSG00000114124	GRK7	chr3:141778148-141818490	2.72255	1.60133	1.32057	2.46534	2.20764	1.88743	2.42174	1.81576	1.05853	1.52675	1.26612	2.88195		1.93131	0.602789
ENSGALG00000002802	ENSGALG00000002802	PACSIN1	PACSIN1	chr26:4361059-4364487	ENSG00000124507	PACSIN1	chr6:34466061-34535231	12.009	13.7879	27.164	10.31	17.5596	26.5759	11.1484	17.9444	27.8046	15.8867	14.2925	3.16279		16.4705	7.53083
ENSGALG00000002803	ENSGALG00000002803	MTA1	MTA1	chr8:4026900-4093219	ENSG00000182979	MTA1	chr14:105419820-105470729	63.8185	90.0401	129.177	56.441	64.455	84.1207	58.9147	98.2654	116.263	81.4833	63.0515	61.2218		80.6043	23.9803
ENSGALG00000002804	ENSGALG00000002804	RND2	RND2	chr27:5549485-5564038	ENSG00000108830	RND2	chr17:43025241-43032036	24.9551	12.4418	3.53772	24.1732	13.6538	6.3937	18.4418	7.58356	2.86399	8.53298	12.2823	24.3		13.2633	8.03797
ENSGALG00000002813	ENSGALG00000002813	RPS10-NUDT3	RPS10	chr26:4376880-4382436	ENSG00000270800	RPS10-NUDT3	chr6:34284887-34426071	2159.75	2327.96	2461.17	2285.03	2263.41	2197.1	2436.19	2724.31	3491.78	3086.19	2248.24	2319.36		2500.04	406.589
ENSGALG00000002816	ENSGALG00000002816	STK10	STK10	chr13:8806328-8849902	ENSG00000072786	STK10	chr5:172042073-172188386	3.15352	1.5901	1.2381	2.99843	1.57812	1.14014	2.19589	1.40352	1.00134	5.20931	16.4632	2.84922		3.40174	4.2854
ENSGALG00000002818	ENSGALG00000002818	VAT1	VAT1	chr27:5538067-5543804	ENSG00000108828	VAT1	chr17:43014605-43025123	80.5723	72.1305	36.6711	52.8736	50.8059	50.6134	53.5092	55.7847	21.871	33.8205	53.637	53.7367		51.3355	15.7132
ENSGALG00000002820	ENSGALG00000002820	DFFA	DFFA	chr21:3732185-3735823	ENSG00000160049	DFFA	chr1:10456522-10472526	36.3419	37.986	44.728	33.9399	43.5216	37.558	35.8892	38.844	42.6047	34.6183	33.6585	39.6559		38.2788	3.73738
ENSGALG00000002827	ENSGALG00000002827	GPS1	GPS1	chr18:4968054-5062966	ENSG00000169727	GPS1	chr17:82050691-82057470	58.6391	64.6536	62.5481	57.4402	52.5044	58.9069	58.7498	61.6242	62.9322	60.8758	55.7175	55.4068		59.1665	3.54965
ENSGALG00000002830	ENSGALG00000002830	NUDT3	NUDT3	chr26:4384290-4404329	ENSG00000272325	NUDT3	chr6:34279679-34392674	26.4174	29.9347	25.2996	23.2573	27.2808	15.3536	24.6954	22.0743	22.2077	25.0721	29.8609	32.5353		25.3324	4.50535
ENSGALG00000002831	ENSGALG00000002831	SH3PXD2B	SH3PXD2B	chr13:8853752-8918179	ENSG00000174705	SH3PXD2B	chr5:172325000-172454523	16.8035	4.29349	2.97427	15.2564	6.13047	4.15855	14.3694	5.17664	2.3613	7.42754	14.697	20.3727		9.50177	6.31692
ENSGALG00000002832	ENSGALG00000002832	IFI35	IFI35	chr27:5526111-5528076	ENSG00000068079	IFI35	chr17:43006725-43014456	41.32	40.5697	35.6713	45.6396	48.8574	35.7086	42.6578	37.36	48.1291	53.5424	57.0496	50.5509		44.7547	7.03056
ENSGALG00000002836	ENSGALG00000002836	PEX14	PEX14	chr21:3735984-3808321	ENSG00000142655	PEX14	chr1:10472288-10630758	31.5454	32.2062	29.902	30.5924	31.5252	31.4348	30.2965	30.4156	29.17	29.4961	28.0695	31.622		30.523	1.21656
ENSGALG00000002837	ENSGALG00000002837	RPL27	RPL27	chr27:5522071-5524344	ENSG00000131469	RPL27	chr17:42998273-43002959	8187.52	8839.61	8979.22	9277.67	12517.8	8318.76	9559.7	9491.06	12816.5	11669.3	8198.55	8909.23		9730.41	1654.09
ENSGALG00000002840	ENSGALG00000002840	GRM4	GRM4	chr26:4441093-4474651	ENSG00000124493	GRM4	chr6:34018645-34155622	2.6185	3.04698	1.82786	1.95842	1.12085	1.78913	3.07534	2.5489	1.90463	3.29544	2.17453	2.89881		2.35495	0.660496
ENSGALG00000002841	ENSGALG00000002841	RFNG	RFNG	chr18:4968054-5062966	ENSG00000169733	RFNG	chr17:82047902-82051831	13.8861	14.2194	13.5735	12.7858	11.737	12.1338	13.0232	12.8323	13.5239	15.4992	18.4187	15.5715		13.9337	1.83538
ENSGALG00000002843	ENSGALG00000002843	RILP	RILP	chr19:5340638-5344241	ENSG00000167705	RILP	chr17:1646145-1650077	4.36758	4.49273	4.73374	3.81185	3.77951	3.45702	5.07188	4.12384	6.32246	6.12173	8.40845	5.80213		5.04108	1.41521
ENSGALG00000002845	ENSGALG00000002845	CTNNA3	CTNNA3	chr6:6694535-7131100	ENSG00000183230	CTNNA3	chr10:65912518-67696169	0.113463	0.145634	0.0221167	0.120092	0.0910803	0.0615559	0.143038	0.108102	0.168089	0.0880928	0.206249	0.107255		0.114564	0.0484137
ENSGALG00000002846	ENSGALG00000002846	-	NEURL1B	chr13:8924781-8949939	ENSG00000214357	NEURL1B	chr5:172641266-172691540	6.00019	1.23119	0.381904	5.06906	0.996074	0.531465	3.05109	0.642965	0.134375	1.17544	2.96787	6.74335		2.41041	2.34164
ENSGALG00000002847	ENSGALG00000002847	-	ENSGALG00000002847	chr7:2684734-2686541	ENSG00000235376	RPEL1	chr10:103245887-103248016	85.6117	88.0608	83.1641	84.1881	102.06	81.4853	90.9063	95.4643	119.418	135.433	183.518	116.145		105.455	29.9162
ENSGALG00000002848	ENSGALG00000002848	-	OPN1MSW	chr26:4557194-4562767				0	0	0	0	0	0	0	0	0	0	0.0187951	0.0473661		0.00551343	0.0142447
ENSGALG00000002849	ENSGALG00000002849	DER	DCXR	chr18:4968054-5062966	ENSG00000169738	DCXR	chr17:82035136-82037732	15.9928	16.623	29.2892	15.6585	23.1089	25.58	14.4679	18.2394	38.3286	32.869	25.853	19.024		22.9195	7.63711
ENSGALG00000002850	ENSGALG00000002850	RASA2	RASA2	chr9:10213880-10256070	ENSG00000155903	RASA2	chr3:141487047-141615342	20.1509	20.361	20.5204	22.1467	23.9794	22.5451	23.3285	22.3041	15.6839	15.5879	9.69208	17.9763		19.523	4.14999
ENSGALG00000002853	ENSGALG00000002853	CFDP1	CFDP1	chr11:2041058-2091973	ENSG00000153774	CFDP1	chr16:75293698-75433485	108.617	120.346	114.304	117.586	172.514	109.533	121.72	105.908	166.576	131.285	109.465	114.707		124.38	22.243
ENSGALG00000002854	ENSGALG00000002854	-	ENSGALG00000002854	chrZ:9459676-9469737	ENSG00000133401	PDZD2	chr5:31639410-32110931	0.222455	0.173358	0.384062	0.224239	0.295919	0.35467	0.169677	0.185703	0.146469	0.260193	1.08932	0.369729		0.322983	0.254883
ENSGALG00000002855	ENSGALG00000002855	SARDH	SARDH	chr17:7501368-7519642	ENSG00000123453	SARDH	chr9:133663560-133739955	1.70076	1.76607	0.843181	1.67311	0.796592	0.819117	1.26115	1.58859	0.592739	2.31083	3.6888	1.76445		1.56712	0.846547
ENSGALG00000002856	ENSGALG00000002856	RUNDC1	RUNDC1	chr27:5517865-5521586	ENSG00000198863	RUNDC1	chr17:42980565-42993690	52.8583	40.6574	36.5908	57.6648	49.3353	41.4369	54.6745	39.1359	41.8954	40.0157	41.1908	61.2216		46.3898	8.31292
ENSGALG00000002860	ENSGALG00000002860	MLN	MLN	chr26:4573763-4579315	ENSG00000096395	MLN	chr6:33794673-33804011	0.105053	0.471941	0.327639	0	0.202391	0.390812	0.0623228	0	0.207507	0.296595	0.145495	0.122222		0.194331	0.151553
ENSGALG00000002861	ENSGALG00000002861	-	TMEM170A	chr11:2092216-2096349	ENSG00000261717	AC009163.4	chr16:75412684-75464706	11.9366	13.8206	13.9734	10.26	11.9532	13.3778	11.756	12.4959	13.9081	10.9147	10.1545	12.0719		12.2186	1.35187
ENSGALG00000002863	ENSGALG00000002863	ERGIC1	ERGIC1	chr13:9079517-9134685	ENSG00000113719	ERGIC1	chr5:172834275-172952685	102.824	101.965	82.9222	106.071	83.4349	97.6554	103.306	93.6326	70.8101	72.7442	63.364	92.2897		89.2516	14.4031
ENSGALG00000002864	ENSGALG00000002864	LRRTM3	LRRTM3	chr6:6694535-7131100	ENSG00000198739	LRRTM3	chr10:66926006-67099830	0	0.0118973	0.0289084	0.031394	0.011905	0	0.0219956	0.0094199	0	0.0104677	0.0256747	0		0.0126386	0.0117901
ENSGALG00000002866	ENSGALG00000002866	-	ENSGALG00000002866	chr7:2690869-2723639	ENSG00000144445	KANSL1L	chr2:210021423-210171383	11.5595	13.2812	9.66319	11.6966	12.0743	15.0882	12.6805	11.242	8.6764	7.67388	9.07197	11.2474		11.1629	2.09895
ENSGALG00000002868	ENSGALG00000002868	RPL26	ATP6V0E1	chr13:9138201-9153259	ENSG00000161970	RPL26	chr17:8377520-8383213	3915.9	4589.98	4707.89	4886.97	6196.49	4766.02	4918.57	4931.94	6762.96	5651.77	4024.57	4138.29		4957.61	860.463
ENSGALG00000002870	ENSGALG00000002870	LEMD2	LEMD2	chr26:4584747-4595583	ENSG00000161904	LEMD2	chr6:33771202-33789136	26.4867	22.0448	20.9743	25.1009	22.4134	23.7782	25.8068	21.0995	16.4402	20.1229	17.2589	25.1713		22.2248	3.24456
ENSGALG00000002877	ENSGALG00000002877	LRRC45	LRRC45	chr18:4968054-5062966	ENSG00000169683	LRRC45	chr17:82023302-82031151	10.2402	9.36142	9.15974	10.6989	10.9266	9.11703	9.8733	9.64068	9.42379	10.116	7.09113	12.6541		9.85857	1.31614
ENSGALG00000002878	ENSGALG00000002878	CREBRF	CREBRF	chr13:9155351-9173391	ENSG00000164463	CREBRF	chr5:173056352-173139284	2.86849	2.57046	3.18002	2.63881	1.6738	3.25156	2.71532	2.03233	1.53327	1.36895	4.44805	2.65444		2.57796	0.857832
ENSGALG00000002880	ENSGALG00000002880	AARSD1	AARSD1	chr27:5511313-5515677	ENSG00000266967	AARSD1	chr17:42950526-42964498	13.5626	13.7695	10.9723	12.3186	14.9047	9.91392	14.9063	13.0785	13.6701	17.6887	20.1113	16.8469		14.312	2.85122
ENSGALG00000002881	ENSGALG00000002881	C26H6ORF125	C26H6ORF125	chr26:4615587-4620386	ENSG00000137288	UQCC2	chr6:33694293-33711727	122.944	133.408	149.131	143.432	193.11	127.646	143.262	143.853	216.039	166.633	162.93	144.084		153.873	27.224
ENSGALG00000002882	ENSGALG00000002882	BNIP1	BNIP1	chr13:9179298-9184374	ENSG00000113734	BNIP1	chr5:173144442-173164387	18.9029	23.0481	22.3148	20.1945	22.7072	19.2332	17.6633	19.9141	24.0107	19.1578	21.8964	19.4949		20.7115	1.99652
ENSGALG00000002883	ENSGALG00000002883	SCAPER	SCAPER	chr10:3137048-3285328	ENSG00000140386	SCAPER	chr15:76347904-76905444	3.9089	3.80093	3.80969	3.50204	4.42144	4.55344	3.39059	3.8822	2.95389	3.88765	7.95646	4.22904		4.19136	1.26401
ENSGALG00000002886	ENSGALG00000002886	NKX2-5	NKX2-5	chr13:9204061-9206276	ENSG00000183072	NKX2-5	chr5:173232109-173235357	0.406987	0.174128	0.352585	0.15316	0.406561	0.364493	0.348754	0.367651	0.476387	1.17457	19.3211	1.05222		2.04988	5.44804
ENSGALG00000002888	ENSGALG00000002888	CASZ1	CASZ1	chr21:3822316-3944648	ENSG00000130940	CASZ1	chr1:10636604-10796650	0.21856	0.0917202	0.0746955	0.136529	0.0776592	0.0681627	0.0947239	0.0949667	0.0700856	0.174749	0.7004	0.161032		0.163607	0.175759
ENSGALG00000002891	ENSGALG00000002891	ACADL	ACADL	chr7:2747213-2760913	ENSG00000115361	ACADL	chr2:210187939-210225491	28.0506	26.3928	19.2897	30.1888	33.8253	22.8961	31.2735	27.8173	29.1849	38.8372	33.9588	29.7062		29.2851	5.14718
ENSGALG00000002892	ENSGALG00000002892	-	ENSGALG00000002892	chr6:7767062-7786126				10.1919	12.5329	16.2266	7.16138	10.344	15.6434	9.16113	13.424	12.4826	12.5025	10.7593	6.79944		11.4358	2.95702
ENSGALG00000002893	ENSGALG00000002893	STC2	STC2	chr13:9230033-9239581	ENSG00000113739	STC2	chr5:173314713-173329503	8.76762	8.16987	6.22789	7.85538	7.29351	9.16983	8.2926	5.32712	3.49242	3.94645	4.27807	5.2999		6.51005	2.00296
ENSGALG00000002897	ENSGALG00000002897	SLC16A14	SLC16A14	chr9:10142630-10150156	ENSG00000163053	SLC16A14	chr2:230034974-230068999	0.809091	1.29813	1.26169	0.685087	1.01031	1.61644	0.906653	1.23338	0.799081	0.812192	0.18676	0.261478		0.906691	0.417155
ENSGALG00000002899	ENSGALG00000002899	AACS	AACS	chr15:4478298-4515607	ENSG00000081760	AACS	chr12:125065379-125143333	15.8905	16.602	10.3032	16.5975	17.8495	10.6391	13.9565	13.3249	11.7554	14.3226	13.5474	16.2527		14.2534	2.46762
ENSGALG00000002900	ENSGALG00000002900	NOTUM	NOTUM	chr18:5104161-5110492	ENSG00000185269	NOTUM	chr17:81952507-81961840	15.4742	12.2197	7.60909	13.5111	9.35275	7.47564	13.8276	8.93208	5.99324	12.3354	6.73728	21.9267		11.2829	4.57434
ENSGALG00000002904	ENSGALG00000002904	REEP3	REEP3	chr6:7790267-7824279	ENSG00000165476	REEP3	chr10:63521363-63625123	14.2837	15.5165	11.4266	13.1524	12.8809	24.3703	16.3867	18.5997	5.6917	10.8301	16.3684	10.4894		14.1664	4.69088
ENSGALG00000002906	ENSGALG00000002906	TARDBP	TARDBP	chr21:4062042-4067667	ENSG00000120948	TARDBP	chr1:11012344-11026420	88.7338	81.4307	80.7102	94.4466	88.4768	77.4503	92.7837	76.723	79.5441	78.1033	71.0577	84.4929		82.8294	7.05783
ENSGALG00000002907	ENSGALG00000002907	MYL1	MYL1	chr7:2770679-2788461	ENSG00000168530	MYL1	chr2:210290150-210315190	0	0	0.140646	0.0509112	0	0	0	0.0458283	0	0.132113	0.0624545	0.0524645		0.0403681	0.051368
ENSGALG00000002908	ENSGALG00000002908	TRAIP	TRAIP	chr12:2527219-2545564	ENSG00000183763	TRAIP	chr3:49828599-49856574	69.3963	74.6867	67.6037	70.979	86.7798	77.6779	68.0975	74.5685	76.6532	64.4127	67.044	83.762		73.4718	6.89537
ENSGALG00000002911	ENSGALG00000002911	MOXD1	MOXD1	chr3:57097208-57149346	ENSG00000079931	MOXD1	chr6:132296055-132401545	4.97468	5.68431	1.86318	4.91358	3.9496	3.35539	4.3685	3.52147	1.45497	2.19033	1.00102	4.04818		3.44377	1.50774
ENSGALG00000002913	ENSGALG00000002913	BNAS1	BRI3BP	chr15:4518238-4520623	ENSG00000184992	BRI3BP	chr12:124993700-125031231	100.912	84.4449	38.0245	75.4116	68.356	60.3413	75.7169	64.525	21.4224	32.0796	31.7319	65.5542		59.8767	24.1713
ENSGALG00000002919	ENSGALG00000002919	MON1A	MON1A	chr12:2566255-2571117	ENSG00000164077	MON1A	chr3:49908862-49930173	11.7626	13.5908	12.3367	11.0995	11.1756	11.3206	11.2874	11.8981	14.3623	16.7284	19.254	15.7147		13.3776	2.64156
ENSGALG00000002921	ENSGALG00000002921	LANCL1	LANCL1	chr7:2801671-2817362	ENSG00000115365	LANCL1	chr2:210431249-210477652	36.1887	41.477	35.0824	37.8411	32.7537	35.0745	37.7379	35.6184	34.221	33.7903	40.433	40.8085		36.7522	2.90543
ENSGALG00000002922	ENSGALG00000002922	NOTCH2	NOTCH2	chr8:4177694-4256719	ENSG00000134250	NOTCH2	chr1:119911553-120069626	42.0391	29.7724	18.5482	36.5562	23.6101	26.4638	34.537	33.5097	14.0124	16.0005	12.9618	33.3479		26.7799	9.69549
ENSGALG00000002925	ENSGALG00000002925	ETFA	ETFA	chr10:3302352-3380261	ENSG00000140374	ETFA	chr15:76215355-76311472	125.591	143.617	163.16	135.2	172.885	146.316	143.943	156.618	195.738	174.818	154.354	125.952		153.183	20.9548
ENSGALG00000002929	ENSGALG00000002929	TRIP12	TRIP12	chr9:10054637-10117917	ENSG00000153827	TRIP12	chr2:229763838-229923239	24.5745	26.8735	23.9002	19.2889	20.8771	26.9548	25.6315	31.1262	15.4587	19.4134	26.5022	18.06		23.2218	4.58244
ENSGALG00000002931	ENSGALG00000002931	REG4	REG4	chr8:4258297-4259712	ENSG00000134193	REG4	chr1:119794018-119811660	2.21957	1.1947	0.334953	1.45501	1.37939	0.443929	1.78399	1.45527	0.565705	1.61715	0.694132	2.66561		1.31745	0.718435
ENSGALG00000002932	ENSGALG00000002932	-	NME2	chr18:5120225-5122254	ENSG00000011052	NME1-NME2	chr17:51153590-51171744	2121.22	2600.58	3020.67	2464	3162.07	2842.46	2582.64	2731.25	4855.98	3892.43	2664.18	2513.64		2954.26	743.598
ENSGALG00000002937	ENSGALG00000002937	PSME3	PSME3	chr27:5483513-5490234	ENSG00000131467	PSME3	chr17:42824385-42843758	208.523	236.757	212.071	206.662	225.448	233.792	207.159	224.13	215.81	208.902	229.929	198.529		217.309	12.3162
ENSGALG00000002942	ENSGALG00000002942	JMJD1C	JMJD1C	chr6:7841427-7988525	ENSG00000171988	JMJD1C	chr10:63167221-63521850	15.5854	13.3338	15.9	14.7269	14.4919	20.3624	16.1284	20.2792	13.4089	15.6021	17.1502	12.6757		15.8037	2.47401
ENSGALG00000002943	ENSGALG00000002943	PRPF8	PRPF8	chr19:5344522-5362178	ENSG00000174231	PRPF8	chr17:1650629-1684882	123.192	93.2146	106.274	115.503	92.004	144.796	120.323	133.07	109.184	109.215	79.6345	93.3535		109.98	18.766
ENSGALG00000002944	ENSGALG00000002944	CPS1	CPS1	chr7:2817506-2918510	ENSG00000021826	CPS1	chr2:210477682-210679107	0.3368	0.168115	0.213972	0.408407	0.304405	0.278431	0.288609	0.177478	0.0739184	0.232437	0.388712	0.355561		0.268904	0.0993422
ENSGALG00000002945	ENSGALG00000002945	TMEM266	TMEM266	chr10:3302352-3380261	ENSG00000169758	TMEM266	chr15:76059837-76229121	4.35586	3.54635	5.20382	3.00402	4.58083	5.32763	3.87291	4.43438	7.14283	4.57566	3.51608	3.70582		4.43885	1.09946
ENSGALG00000002952	ENSGALG00000002952	NRG4	NRG4	chr10:3406349-3428169	ENSG00000169752	NRG4	chr15:75935969-76059795	2.35713	2.4582	2.64191	2.578	2.53074	2.67176	2.57824	2.0399	3.20096	2.74512	2.60143	2.03534		2.53656	0.310165
ENSGALG00000002954	ENSGALG00000002954	MBTD1	MBTD1	chr18:5125935-5169680	ENSG00000011258	MBTD1	chr17:51177425-51260163	10.7684	14.0139	14.9877	9.10274	12.1493	17.4737	8.49102	13.221	7.58266	5.94922	8.37819	7.76979		10.824	3.53194
ENSGALG00000002955	ENSGALG00000002955	ADAMTSL2	ADAMTSL2	chr17:7446664-7466142	ENSG00000197859	ADAMTSL2	chr9:133532164-133575519	2.29298	1.93727	1.41548	2.33265	1.53016	0.886414	2.15521	2.98678	1.9581	5.35695	5.42305	3.69684		2.66432	1.46388
ENSGALG00000002957	ENSGALG00000002957	SLC12A3	SLC12A3	chr11:2096874-2103590	ENSG00000070915	SLC12A3	chr16:56865207-56915850	32.7317	22.273	10.419	38.8483	22.6534	18.1674	26.0995	13.0547	14.3304	13.7677	9.10737	31.9041		21.113	9.66076
ENSGALG00000002958	ENSGALG00000002958	DNER	DNER	chr9:9937752-10044440	ENSG00000187957	DNER	chr2:229357629-229714558	2.03543	2.16491	7.73301	1.79627	3.42303	6.07224	1.61426	2.08456	6.03339	2.06508	3.42927	0.781551		3.26942	2.17766
ENSGALG00000002959	ENSGALG00000002959	NRBF2	NRBF2	chr6:7995725-8009844	ENSG00000148572	NRBF2	chr10:63133247-63155031	27.7062	32.7171	41.5661	34.5804	42.1376	38.7168	34.4151	35.3418	44.637	38.5178	37.1283	28.744		36.3507	5.16933
ENSGALG00000002960	ENSGALG00000002960	HMGCS2	HMGCS2	chr8:4260455-4264048	ENSG00000134240	HMGCS2	chr1:119747996-119768905	1.00932	1.0894	0.786966	1.37259	0.913334	0.540467	1.46973	1.18893	1.08746	2.07244	2.41451	1.84148		1.31555	0.550961
ENSGALG00000002963	ENSGALG00000002963	PID1	PID1	chr9:9846032-9924167	ENSG00000153823	PID1	chr2:228850526-229271285	4.71287	4.26115	0.519142	3.70398	2.70796	1.40145	2.56968	1.07142	0.705802	0.626607	0.307373	1.24741		1.98624	1.55521
ENSGALG00000002964	ENSGALG00000002964	DHX37	DHX37	chr15:4523963-4535466	ENSG00000150990	DHX37	chr12:124946825-124989122	50.218	52.416	40.9979	49.0252	52.5694	45.4581	47.4262	45.8142	42.3907	42.7441	37.8942	48.074		46.2523	4.58771
ENSGALG00000002967	ENSGALG00000002967	ZNF365	ZNF365	chr6:8157124-8275706	ENSG00000138311	ZNF365	chr10:62374192-62672011	12.0591	9.34127	2.5429	12.3417	7.31753	4.46867	12.2777	8.56232	3.76451	7.12753	8.04399	10.3292		8.18137	3.33289
ENSGALG00000002968	ENSGALG00000002968	ZNF341	ZNF341	chr20:2222382-2241992	ENSG00000131061	ZNF341	chr20:33731657-33792269	7.43917	8.38771	6.84192	6.72485	8.41512	7.60766	6.83831	6.66777	8.30689	7.52846	12.6446	8.34075		7.9786	1.62038
ENSGALG00000002969	ENSGALG00000002969	MAU2	MAU2	chr28:3521625-3533172	ENSG00000129933	MAU2	chr19:19320681-19358755	28.1804	26.7113	17.9152	22.54	17.0278	20.4395	22.2286	22.222	14.4041	15.0069	16.4949	27.3568		20.8773	4.81576
ENSGALG00000002971	ENSGALG00000002971	NSD1	NSD1	chr13:10206725-10259504	ENSG00000165671	NSD1	chr5:177133025-177300215	75.9494	73.3961	111.471	64.0155	78.4814	153.051	75.09	111.724	96.3163	68.6485	36.1744	52.6751		83.0827	31.077
ENSGALG00000002973	ENSGALG00000002973	-	BECN1	chr27:5478573-5483356	ENSG00000196289	BECN2	chr1:241957767-241959062	36.6016	30.54	31.1313	37.8769	39.9516	35.4501	38.4144	32.5673	29.6909	31.7147	30.3514	37.4909		34.3151	3.68241
ENSGALG00000002974	ENSGALG00000002974	SPHKAP	SPHKAP	chr9:9572307-9638300	ENSG00000153820	SPHKAP	chr2:227979950-228181645	0.0324564	0.0080811	0.00981786	0.0488504	0.0161797	0.040242	0.0385141	0.0128023	0.00829073	0.0140545	0.0349011	0.0440484		0.0256865	0.0154829
ENSGALG00000002980	ENSGALG00000002980	RTKN2	RTKN2	chr6:8157124-8275706	ENSG00000182010	RTKN2	chr10:62183035-62268707	9.9909	6.87345	4.68692	9.15625	6.47893	6.74955	7.82155	6.5814	3.17598	4.45038	2.96189	6.8658		6.31608	2.17383
ENSGALG00000002981	ENSGALG00000002981	ERCC4	ERCC4	chr14:668702-679472	ENSG00000175595	ERCC4	chr16:13920157-13952345	11.4494	9.10605	8.27515	11.8188	9.86059	10.8276	11.9561	9.7193	5.47192	6.42246	6.20891	8.80353		9.15998	2.22448
ENSGALG00000002982	ENSGALG00000002982	SLC2A6	SLC2A6	chr17:7412382-7416017	ENSG00000160326	SLC2A6	chr9:133471095-133479137	0.112627	0.0578246	0.105378	0	0.028931	0.11173	0.0801792	0.0228919	0.207636	0.228944	0	0		0.0796785	0.0778988
ENSGALG00000002984	ENSGALG00000002984	RAB24	RAB24	chr13:10198635-10200864	ENSG00000169228	RAB24	chr5:177301198-177303744	117.41	149.556	170.384	112.564	120.588	118.507	132.641	159.223	199.564	234.352	301.264	166.196		165.187	56.4637
ENSGALG00000002985	ENSGALG00000002985	UTP18	UTP18	chr18:5125935-5169680	ENSG00000011260	UTP18	chr17:51260528-51297936	138.488	170.151	179.843	165.452	181.839	170.697	159.499	165.552	200.891	167.462	133.127	129.203		163.517	21.0231
ENSGALG00000002987	ENSGALG00000002987	SERPINF2	SERPINF2	chr19:5397322-5403025	ENSG00000167711	SERPINF2	chr17:1742836-1755268	0.354522	0.227521	0.552839	0.428838	0.0650481	0.722238	0.390594	0.437494	0.333462	0.428963	2.10428	0.412461		0.538188	0.518246
ENSGALG00000002988	ENSGALG00000002988	PHGDH	PHGDH	chr8:4264702-4268005	ENSG00000092621	PHGDH	chr1:119648411-119744226	27.2664	46.7191	57.1275	24.9738	41.3198	44.2361	24.4629	32.0016	60.4963	45.7676	26.3634	27.4886		38.1853	12.8198
ENSGALG00000002990	ENSGALG00000002990	PRELID1	PRELID1	chr13:10196747-10198549	ENSG00000169230	PRELID1	chr5:177303774-177306959	959.499	923.62	937.044	992.871	1043.84	852.323	1015.95	1072.04	1317.03	1212.67	1082.16	1163.66		1047.73	132.323
ENSGALG00000002992	ENSGALG00000002992	DAW1	DAW1	chr9:9550992-9568072	ENSG00000123977	DAW1	chr2:227871054-227924344	0.0704571	0.0678259	0.137338	0.119317	0.294102	0.0873699	0.125396	0.089504	0.0695854	0.059676	0.121975	0.286901		0.127454	0.0804458
ENSGALG00000002993	ENSGALG00000002993	CA10	CA10	chr18:5218243-5378213	ENSG00000154975	CA10	chr17:51630313-52160017	2.55051	2.10771	2.34276	3.65523	3.15613	2.61396	3.24727	2.4263	2.74516	2.64358	5.53241	4.01065		3.08597	0.951601
ENSGALG00000003003	ENSGALG00000003003	CCL20	CCL20	chr9:9539781-9541879	ENSG00000115009	CCL20	chr2:227813842-227817564	2.79094	0.3643	0.368828	3.15092	0.303779	0	2.52568	0	0	0.213684	0.327571	0.275174		0.860073	1.19885
ENSGALG00000003005	ENSGALG00000003005	CHRNB4	CHRNB4	chr10:3543222-3555508	ENSG00000117971	CHRNB4	chr15:78624119-78727754	0	0	0	0	0	0	0.0173171	0.0148325	0.0192194	0	0.0202137	0		0.00596523	0.00889769
ENSGALG00000003010	ENSGALG00000003010	NUP93	NUP93	chr11:2106866-2172556	ENSG00000102900	NUP93	chr16:56730105-56850286	107.857	107.162	128.612	118.482	126.172	134.01	127.101	137.157	161.564	141.134	98.6111	95.1226		123.582	19.2224
ENSGALG00000003011	ENSGALG00000003011	TOM1L1	TOM1L1	chr18:5886791-5907213	ENSG00000141198	TOM1L1	chr17:54899387-54961956	4.80056	1.63981	1.12692	4.37076	1.558	0.928142	3.16947	1.3377	0.951632	1.9237	5.23666	9.42863		3.03933	2.5461
ENSGALG00000003013	ENSGALG00000003013	CABCOCO1	C10orf107	chr6:8440346-8491796	ENSG00000183346	CABCOCO1	chr10:61662961-61766766	0.258694	0.132818	0.161362	0.233648	0.0996776	0.224554	0.092082	0.131451	0.0681315	0.146073	0.0716562	0.180583		0.150061	0.0638292
ENSGALG00000003014	ENSGALG00000003014	CHRNA3	CHRNA3	chr10:3561046-3566864	ENSG00000080644	CHRNA3	chr15:78593052-78621295	0.534971	0.865785	0.689147	0.81405	1.34433	0.403801	0.634742	0.638225	0.67384	0.577881	0.515418	1.00125		0.724453	0.254426
ENSGALG00000003015	ENSGALG00000003015	SERPINF1	SERPINF1	chr19:5406928-5413790	ENSG00000132386	SERPINF1	chr17:1761959-1777574	0.803885	0.514088	0.959698	0.976955	0.648944	0.778893	0.432766	0.807855	0.738333	0.581038	1.15722	0.641397		0.753423	0.207854
ENSGALG00000003016	ENSGALG00000003016	MASP2	MASP2	chr21:4069605-4082988	ENSG00000009724	MASP2	chr1:11026523-11047233	2.4793	1.62721	2.52487	2.04986	1.97047	1.61754	2.23232	2.31636	3.05475	3.05067	4.21995	2.67512		2.48487	0.721557
ENSGALG00000003021	ENSGALG00000003021	CHRNA5	CHRNA5	chr10:3569394-3580686	ENSG00000169684	CHRNA5	chr15:78565520-78595269	3.1425	3.1078	2.8117	2.41369	2.48123	2.84278	2.23103	2.068	1.01758	1.83261	2.17612	2.87691		2.41683	0.60832
ENSGALG00000003022	ENSGALG00000003022	-	ENSGALG00000003022	chr8:4300209-4347886				0.343029	0.220169	0.208288	0.35647	0.576283	0.329716	0.420402	0.540431	0.437667	0.816827	0.659904	0.509959		0.451595	0.179202
ENSGALG00000003024	ENSGALG00000003024	ARMC6	ARMC6	chr28:3671338-3676081	ENSG00000105676	ARMC6	chr19:19033575-19060311	43.8167	48.084	43.7007	43.013	41.9798	40.4593	42.5766	45.7946	50.6466	51.1827	56.0935	51.2638		46.5509	4.82736
ENSGALG00000003025	ENSGALG00000003025	-	ENSGALG00000003025	chr9:9513720-9518480	ENSG00000135917	SLC19A3	chr2:227685210-227718012	0.0821457	0.0351458	0.213496	0.0618273	0.070337	0.135819	0.0324886	0.0556547	0.252403	0.216459	0.189614	0.0955707		0.12008	0.0783649
ENSGALG00000003026	ENSGALG00000003026	MKL2	MKL2	chr14:693145-750746	ENSG00000186260	MKL2	chr16:14071321-14266773	6.67329	4.16348	3.82312	5.07801	4.19039	6.41946	4.98989	4.94477	2.3243	2.64364	2.69025	3.78884		4.31079	1.39407
ENSGALG00000003029	ENSGALG00000003029	PLPP6	PLPP6	chr8:4300209-4347886	ENSG00000205808	PLPP6	chr9:4662315-4665258	35.6713	33.1816	25.308	33.5069	27.393	23.5718	29.4128	28.7997	33.0196	32.9258	34.1874	40.4729		31.4542	4.72921
ENSGALG00000003031	ENSGALG00000003031	SMYD4	SMYD4	chr19:5414294-5420886	ENSG00000186532	SMYD4	chr17:1779485-1830634	15.187	14.094	12.6932	15.8353	14.9451	11.7534	14.503	11.7282	14.01	14.1279	20.1823	19.8459		14.9088	2.70269
ENSGALG00000003033	ENSGALG00000003033	STXBP4	STXBP4	chr18:5924876-5940217	ENSG00000166263	STXBP4	chr17:54968727-55173632	4.90547	4.54507	6.2311	3.81438	3.17108	6.60671	3.04508	3.89578	2.82345	2.20125	3.77938	3.13705		4.01298	1.34655
ENSGALG00000003034	ENSGALG00000003034	-	SS2	chr21:4096145-4099871				4.49669	3.17443	3.68136	3.55368	4.76472	3.76387	4.13487	3.42738	5.47731	4.4434	1.55694	4.05448		3.87743	0.971686
ENSGALG00000003035	ENSGALG00000003035	FAM78B	FAM78B	chr8:4300209-4347886	ENSG00000188859	FAM78B	chr1:166057426-166166969	9.55233	8.43755	5.52588	7.8274	6.33225	5.98635	8.34804	6.99374	3.44904	2.78389	5.19227	10.277		6.72548	2.30052
ENSGALG00000003039	ENSGALG00000003039	SRM	SRM	chr21:4108252-4113303	ENSG00000116649	SRM	chr1:11054584-11060024	169.141	164.864	122.105	145.798	143.504	122.089	150.747	157.296	121.11	120.969	66.0687	157.539		136.769	28.5023
ENSGALG00000003042	ENSGALG00000003042	PXMP4	PXMP4	chr20:2242490-2246388	ENSG00000101417	PXMP4	chr20:33702754-33720319	39.1704	40.381	40.0784	43.6479	36.3252	34.0146	43.7659	40.1365	45.6473	43.5296	51.9142	47.9623		42.2144	4.94081
ENSGALG00000003045	ENSGALG00000003045	E2F1	E2F1	chr20:2252979-2283007	ENSG00000101412	E2F1	chr20:33675683-33686404	31.2963	32.2352	26.7613	31.0528	29.4048	26.8047	31.1563	25.8715	33.8177	32.4867	33.8997	39.9967		31.232	3.87189
ENSGALG00000003046	ENSGALG00000003046	PSMA4	PSMA4	chr10:3585430-3590548	ENSG00000041357	PSMA4	chr15:78540405-78552419	301.031	304.811	334.207	328.985	393.6	313.267	329.769	317.869	392.099	354.988	331.789	320.927		335.279	30.4458
ENSGALG00000003047	ENSGALG00000003047	SUGP2	SUGP2	chr28:3676511-3687043	ENSG00000064607	SUGP2	chr19:18990888-19034023	16.1008	16.1176	16.5197	14.0818	14.9752	20.4875	14.2112	15.4885	10.5888	9.53491	10.0618	11.52		14.1407	3.21287
ENSGALG00000003052	ENSGALG00000003052	AGFG1	AGFG1	chr9:9475460-9510946	ENSG00000173744	AGFG1	chr2:227472152-227561214	83.3196	90.0979	90.9032	85.2833	81.0011	93.3129	85.6017	96.0594	91.1628	83.3702	86.7115	85.6722		87.708	4.548
ENSGALG00000003053	ENSGALG00000003053	PRDX6	PRDX6	chr8:4300209-4347886	ENSG00000117592	PRDX6	chr1:173477266-173488807	246.003	224.418	190.03	263.549	183.63	193.677	234.734	227.118	257.158	261.765	272.65	320.331		239.589	39.4653
ENSGALG00000003058	ENSGALG00000003058	-	ENSGALG00000003058	chr28:3693224-3701042				0.272529	0.257749	0.178939	0.582974	0.423719	0.44467	0.221244	0.262386	0.226659	0.161985	0.317847	0.300381		0.304257	0.122716
ENSGALG00000003059	ENSGALG00000003059	HLF	HLF	chr18:5980975-6011456	ENSG00000108924	HLF	chr17:55265012-55325065	17.5473	19.6503	23.4857	18.3468	25.7535	29.0713	19.5976	21.244	30.1933	22.1429	20.5389	20.5803		22.346	4.05866
ENSGALG00000003063	ENSGALG00000003063	HYKK	HYKK	chr10:3590683-3595588	ENSG00000188266	HYKK	chr15:78507564-78537372	2.79853	2.06488	2.49979	1.96753	1.17272	1.97381	1.68456	2.03956	3.04003	4.01566	3.8885	2.70879		2.48786	0.854724
ENSGALG00000003065	ENSGALG00000003065	NECAB3	NECAB3	chr20:2252979-2283007	ENSG00000125967	NECAB3	chr20:33657087-33674463	3.72991	6.05453	5.1464	3.62185	4.23703	4.67767	4.15547	3.99636	5.84063	5.39908	5.23933	4.61175		4.72583	0.810408
ENSGALG00000003067	ENSGALG00000003067	MRPL44	MRPL44	chr9:9458053-9461050	ENSG00000135900	MRPL44	chr2:223957404-223967714	191.539	203.546	235.244	198.8	252.205	209.717	204.115	224.08	347.695	282.721	211.067	220.435		231.764	44.5521
ENSGALG00000003068	ENSGALG00000003068	EZH1	EZH1	chr27:5438062-5451028	ENSG00000108799	EZH1	chr17:42700275-42745049	6.4501	4.88913	3.02892	7.11776	4.69055	4.80076	6.37437	4.98586	3.06477	4.09343	5.38022	7.93569		5.2343	1.513
ENSGALG00000003071	ENSGALG00000003071	-	ENSGALG00000003071	chr11:2207705-2210646	ENSG00000087263	OGFOD1	chr16:56451490-56479100	63.2812	78.0417	77.6923	67.0003	77.7383	72.7618	68.1724	77.8686	96.5977	79.6861	58.9185	71.4712		74.1025	9.70005
ENSGALG00000003072	ENSGALG00000003072	RPA1	RPA1	chr19:5421016-5442516	ENSG00000132383	RPA1	chr17:1829702-1900082	94.8112	92.5974	84.2932	94.7803	84.4037	86.0647	90.503	82.8614	78.6785	77.8877	84.8747	91.8617		86.9681	5.85928
ENSGALG00000003073	ENSGALG00000003073	RHOBTB1	RHOBTB1	chr6:8665350-8710772	ENSG00000072422	RHOBTB1	chr10:60869438-61001440	7.08457	5.19838	3.4528	6.43242	6.04018	5.726	6.33988	3.6055	1.85225	1.67325	0.478174	2.79378		4.2231	2.19972
ENSGALG00000003074	ENSGALG00000003074	HOMER3	HOMER3	chr28:3704907-3725461	ENSG00000051128	HOMER3	chr19:18929201-18941261	7.13242	12.5458	9.95981	4.35027	7.83296	9.59409	9.30914	12.5153	9.01579	10.7652	9.14428	5.64278		8.98399	2.47119
ENSGALG00000003075	ENSGALG00000003075	SLC34A1	SLC34A1	chr13:10116556-10122921	ENSG00000131183	SLC34A1	chr5:177379235-177398848	0.184043	0.14575	0.358934	0.207918	0.118474	0.0694013	0.436986	0.268374	0.24254	0.259865	0.175619	0.267744		0.227971	0.101913
ENSGALG00000003076	ENSGALG00000003076	TNFSF6	FASLG	chr8:4479413-4482429	ENSG00000117560	FASLG	chr1:172659018-172666874	0.676128	0.433919	0.225932	0.981433	0.124057	0.299439	0.687622	0.196322	0.572368	0.5454	0.334433	0.842815		0.493322	0.270178
ENSGALG00000003078	ENSGALG00000003078	MMD	MMD	chr18:6019994-6033286	ENSG00000108960	MMD	chr17:55392613-55421992	60.0843	62.4722	91.2035	58.0786	56.1468	73.3346	57.0139	66.7835	72.1366	83.8231	154.401	61.1279		74.7172	27.402
ENSGALG00000003079	ENSGALG00000003079	MFF	MFF	chr9:9434453-9456535	ENSG00000168958	MFF	chr2:227325151-227357836	63.6283	72.1681	69.8464	66.0306	70.8416	64.7104	65.1543	65.9412	73.4501	71.1505	66.7892	62.0193		67.6442	3.69705
ENSGALG00000003081	ENSGALG00000003081	SUCO	SUCO	chr8:4492612-4529747	ENSG00000094975	SUCO	chr1:172532349-172611833	12.0189	10.4874	8.07185	9.925	8.09581	8.82041	9.23137	9.04787	4.3909	6.40183	14.3947	12.3489		9.43625	2.69642
ENSGALG00000003082	ENSGALG00000003082	DPH1	DPH1	chr19:5495905-5510648	ENSG00000108963	DPH1	chr17:2030110-2043430	18.6338	18.5417	12.467	17.3403	15.2855	16.6671	17.6969	16.8368	14.4498	12.9471	8.67459	21.4006		15.9118	3.39343
ENSGALG00000003084	ENSGALG00000003084	NUDT21	NUDT21	chr11:2215970-2222614	ENSG00000167005	NUDT21	chr16:56429133-56452199	216.823	236.651	244.026	241.518	257.41	231.775	243.94	269.374	324.579	282.774	229.67	235.657		251.183	29.27
ENSGALG00000003085	ENSGALG00000003085	CDK1	CDK1	chr6:8734946-8742973	ENSG00000170312	CDK1	chr10:60778331-60794852	569.086	689.265	688.604	614.454	697.91	657.243	622.798	671.293	761.346	684.207	630.626	645.099		660.994	49.4522
ENSGALG00000003086	ENSGALG00000003086	EXOSC10	EXOSC10	chr21:4114484-4128598	ENSG00000171824	EXOSC10	chr1:11066618-11099881	105.678	93.3987	99.3977	114.358	113.229	117.3	116.439	116.119	117.929	107.075	83.7702	102.734		107.286	10.8381
ENSGALG00000003091	ENSGALG00000003091	PARN	PARN	chr14:793824-828456	ENSG00000140694	PARN	chr16:14435701-14632728	24.2682	33.64	35.3806	24.214	33.8067	29.3662	26.1036	29.7424	31.4819	27.228	21.6883	20.0568		28.0814	4.97568
ENSGALG00000003092	ENSGALG00000003092	ERLIN2	ERLIN2	chr22:2202504-2211560	ENSG00000147475	ERLIN2	chr8:37736599-37759101	133.877	121.821	93.129	123.972	116.688	125.912	114.117	102.592	56.1271	68.7033	103.518	115.214		106.306	23.4958
ENSGALG00000003096	ENSGALG00000003096	-	CBFA2T2	chr20:2284255-2334193	ENSG00000078699	CBFA2T2	chr20:33490075-33650036	19.2308	16.933	19.6333	17.273	20.7876	17.8524	19.2876	27.3179	21.4063	23.1174	14.0772	22.0234		19.9117	3.40637
ENSGALG00000003099	ENSGALG00000003099	PCTP	PCTP	chr18:6095733-6104125	ENSG00000141179	PCTP	chr17:55750979-55842830	4.37473	4.95454	8.14045	5.5408	6.65754	6.65549	5.91032	5.23047	8.22973	9.83935	17.5904	5.30354		7.36895	3.59337
ENSGALG00000003101	ENSGALG00000003101	PLPBP	PLPBP	chr22:2214997-2219153	ENSG00000147471	PLPBP	chr8:37762593-37779767	30.1301	34.9043	41.2628	30.6825	36.6677	37.6056	29.1469	35.9336	46.0571	34.5894	40.876	31.1339		35.7492	5.14743
ENSGALG00000003103	ENSGALG00000003103	MST1R	MST1R	chr12:2557712-2564932	ENSG00000164078	MST1R	chr3:49887002-49903873	3.46715	1.99159	1.5417	3.36402	1.70188	1.76234	4.17894	2.82582	1.86243	5.1638	2.54832	3.61842		2.83553	1.14294
ENSGALG00000003105	ENSGALG00000003105	ANKFN1	ANKFN1	chr18:6179730-6229305	ENSG00000153930	ANKFN1	chr17:55882301-56511659	0	0	0	0	0	0	0.0181663	0	0	0	0	0.0356261		0.0044827	0.0111114
ENSGALG00000003106	ENSGALG00000003106	-	TOX2	chr20:2376244-2489922	ENSG00000124191	TOX2	chr20:43914864-44069616	3.80227	4.91921	21.8269	4.08743	4.30671	8.80999	3.73849	5.97319	13.6488	8.19435	24.7143	6.59139		9.21775	7.1711
ENSGALG00000003107	ENSGALG00000003107	AMFR	AMFR	chr11:2223301-2243233	ENSG00000159461	AMFR	chr16:56361452-56425538	23.5689	24.6619	24.4207	22.2233	18.8832	22.0333	23.8515	21.0844	28.6049	29.2921	25.3802	22.6986		23.8919	2.94186
ENSGALG00000003108	ENSGALG00000003108	SMG6	SMG6	chr19:5527952-5625658	ENSG00000070366	SMG6	chr17:2059839-2303771	135.216	133.834	108.734	132.647	150.799	116.483	132.308	125.108	117.259	113.545	101.282	140.659		125.656	14.4308
ENSGALG00000003110	ENSGALG00000003110	-	ENSGALG00000003110	chr18:6232354-6237170				0	0	0	0	0	0	0.0364042	0	0	0	0	0		0.00303368	0.010509
ENSGALG00000003111	ENSGALG00000003111	BFAR	BFAR	chr14:832253-836956	ENSG00000103429	BFAR	chr16:14632815-14669236	6.33755	9.17612	8.19545	5.45349	7.09748	7.61925	7.79461	6.51919	6.81891	4.75684	6.26183	5.35013		6.78174	1.27958
ENSGALG00000003113	ENSGALG00000003113	RGS14	RGS14	chr13:10108226-10113801	ENSG00000169220	RGS14	chr5:177357837-177372601	5.26375	10.8749	15.1644	4.90414	8.54406	11.356	5.41336	9.98361	14.7899	9.9886	4.74063	4.0294		8.7544	3.91345
ENSGALG00000003114	ENSGALG00000003114	NOG	NOG	chr18:6262763-6263435	ENSG00000183691	NOG	chr17:56593699-56595590	13.9773	3.6864	3.78198	17.4374	5.82007	4.98607	18.553	5.77269	3.27776	23.1366	51.0911	41.6565		16.0981	15.7982
ENSGALG00000003118	ENSGALG00000003118	ADGRA2	ADGRA2	chr22:2221233-2236659	ENSG00000020181	ADGRA2	chr8:37784191-37844896	0.269833	0.256942	0.135766	0.146596	0.123004	0.172653	0.196272	0.238896	0.217833	0.383386	0.313508	0.202585		0.22144	0.0766476
ENSGALG00000003120	ENSGALG00000003120	NCOR2	NCOR2	chr15:4635697-4766293	ENSG00000196498	NCOR2	chr12:124324415-124567589	9.66605	6.04474	5.48175	8.33951	7.06034	7.96491	9.47527	8.03066	5.34635	8.22366	16.1086	9.96861		8.47587	2.86224
ENSGALG00000003122	ENSGALG00000003122	ZFAND2A	ZFAND2A	chr14:2374086-2377099	ENSG00000178381	ZFAND2A	chr7:1152071-1160759	100.867	98.9133	92.0501	121.953	109.94	86.691	107.054	103.852	129.342	127.827	173.414	153.228		117.094	25.6536
ENSGALG00000003123	ENSGALG00000003123	CNTNAP1	CNTNAP1	chr27:5427311-5436287	ENSG00000108797	CNTNAP1	chr17:42682613-42699814	0.853756	0.547915	0.702146	0.904458	0.548269	0.645369	0.86034	0.849816	0.97025	1.65095	1.10143	0.891234		0.877161	0.295599
ENSGALG00000003124	ENSGALG00000003124	BRF2	BRF2	chr22:2238251-2241286	ENSG00000104221	BRF2	chr8:37843268-37849904	11.4471	11.7222	10.9657	12.9034	11.7069	10.9276	13.075	10.7287	14.1128	12.686	10.0843	15.0991		12.1216	1.48655
ENSGALG00000003126	ENSGALG00000003126	ERBB4	ERBB4	chr7:3073320-3558739	ENSG00000178568	ERBB4	chr2:211375717-212538841	0.575875	0.393575	0.29418	0.48128	0.384224	0.345827	0.461431	0.372431	0.16742	0.333072	0.684355	0.661288		0.42958	0.151866
ENSGALG00000003128	ENSGALG00000003128	EDEM2	EDEM2	chr20:2675950-2684090	ENSG00000088298	EDEM2	chr20:35115357-35147364	21.9378	22.7557	25.1005	21.6165	22.7241	22.4442	21.3463	19.6245	28.0522	25.803	17.1783	23.0034		22.6322	2.82325
ENSGALG00000003129	ENSGALG00000003129	-	ENSGALG00000003129	chr22:2247857-2251407	ENSG00000156675	RAB11FIP1	chr8:37858618-37899467	11.7457	7.82757	4.29398	9.27368	6.61377	7.73594	8.93396	7.68379	2.06911	4.11113	4.74014	7.07697		6.84214	2.66408
ENSGALG00000003130	ENSGALG00000003130	DDX49	DDX49	chr28:3733487-3739178	ENSG00000105671	DDX49	chr19:18919675-18928633	90.56	98.0941	94.8788	93.9326	99.7053	86.5996	96.3742	94.6682	108.418	96.8271	67.0686	84.2522		92.6149	10.1621
ENSGALG00000003131	ENSGALG00000003131	DGKE	DGKE	chr18:6337105-6344590	ENSG00000153933	DGKE	chr17:56834099-56869567	4.67328	2.84668	2.13066	3.39814	2.84851	3.38865	3.54776	3.05888	1.72102	1.92319	2.49568	3.91651		2.99575	0.858358
ENSGALG00000003134	ENSGALG00000003134	-	ENSGALG00000003134	chr13:10105498-10107050				0.644424	0.526365	0.913555	0.859824	0.752435	0.581175	0.625589	0.893055	1.15718	0.860075	0.973639	0.749742		0.794755	0.182983
ENSGALG00000003135	ENSGALG00000003135	ANK3	ANK3	chr6:8746640-9091849	ENSG00000151150	ANK3	chr10:60026298-60733490	5.60018	4.96494	5.68521	5.31551	5.76327	8.10756	5.13509	5.4607	5.29149	5.97419	6.39103	3.71384		5.61692	1.02055
ENSGALG00000003136	ENSGALG00000003136	IKZF2	IKZF2	chr7:3645915-3763784	ENSG00000030419	IKZF2	chr2:212999691-213152427	1.1537	1.45904	1.58017	1.23858	1.60912	1.58017	1.16755	1.44225	1.42987	1.29915	2.38061	1.63198		1.49768	0.325667
ENSGALG00000003137	ENSGALG00000003137	RFLNA	RFLNA	chr15:4781350-4792186	ENSG00000178882	RFLNA	chr12:123973241-124316024	8.10037	3.17201	1.17753	5.73511	1.23436	2.04302	5.29424	1.67433	0.451986	0.852765	2.09162	13.6571		3.79037	3.8836
ENSGALG00000003138	ENSGALG00000003138	OXTR	OXTR	chr12:19319351-19323273	ENSG00000180914	OXTR	chr3:8750408-8769628	0.194985	0.166848	0.177368	0.0366891	0.0417388	0.141044	0.134954	0.165131	0.128382	0.220199	0.135023	0.13233		0.139558	0.0545854
ENSGALG00000003140	ENSGALG00000003140	-	ENSGALG00000003140	chr15:4868612-4870306				0.0568075	0.0729147	0	0.0641346	0	0	0.067402	0.0577316	0	0	0.157352	0.0660914		0.0452028	0.0478074
ENSGALG00000003142	ENSGALG00000003142	-	PRLHRL	chr22:2255358-2257800	ENSG00000119973	PRLHR	chr10:118589989-118595699	0.0324514	0.0416527	0	0	0.166718	0	0	0	0	0.146591	0.22472	0.0377549		0.0541573	0.0790858
ENSGALG00000003143	ENSGALG00000003143	ZC3H7A	ZC3H7A	chr14:866749-888736	ENSG00000122299	ZC3H7A	chr16:11750586-11797267	11.5666	13.6961	16.2374	12.1618	14.9517	14.6461	14.215	16.8388	15.5978	14.6031	16.1697	11.1746		14.3216	1.86336
ENSGALG00000003144	ENSGALG00000003144	TRIM25	TRIM25	chr18:6353976-6361372	ENSG00000121060	TRIM25	chr17:56887909-56914038	2.16445	1.58972	2.26889	1.84631	1.49808	2.23667	2.2257	2.02389	1.93181	3.53068	9.24277	3.45549		2.83454	2.11525
ENSGALG00000003146	ENSGALG00000003146	CCDC92	CCDC92	chr15:4884284-4896278	ENSG00000119242	CCDC92	chr12:123918660-123972831	8.23783	5.48669	5.8045	7.75141	6.21356	5.41065	6.62289	5.51178	4.50006	5.88504	8.23807	10.933		6.71629	1.77984
ENSGALG00000003147	ENSGALG00000003147	TRPC4AP	TRPC4AP	chr20:2688940-2721644	ENSG00000100991	TRPC4AP	chr20:35002404-35092871	84.6851	82.8322	81.1916	88.5149	71.027	76.5338	81.6785	83.6123	81.1746	76.7438	71.4043	91.8168		80.9346	6.23272
ENSGALG00000003148	ENSGALG00000003148	SPAG16	SPAG16	chr7:3803641-4064465	ENSG00000144451	SPAG16	chr2:213284379-214410501	2.65414	1.98017	2.02004	2.41317	2.61396	2.67212	2.7725	2.55008	2.74123	2.43069	2.05937	2.38696		2.4412	0.282795
ENSGALG00000003149	ENSGALG00000003149	ITPR3	ITPR3	chr26:4622272-4659503	ENSG00000096433	ITPR3	chr6:33620365-33696574	1.60481	0.924221	2.32335	1.20642	1.01337	2.50298	1.82685	1.16383	1.63413	1.34519	0.61002	0.343114		1.37486	0.643407
ENSGALG00000003153	ENSGALG00000003153	COPE	COPE	chr28:3739328-3744161	ENSG00000105669	COPE	chr19:18899514-18919397	246.009	268.271	290.114	273.609	302.71	267.408	266.002	274.127	384.15	324.325	281.829	263.975		286.877	36.7366
ENSGALG00000003154	ENSGALG00000003154	TXNDC11	TXNDC11	chr14:888915-909119	ENSG00000153066	TXNDC11	chr16:11679080-11742878	19.8401	20.7821	19.4487	18.3723	20.2983	21.1981	18.5984	21.8799	18.2466	19.5304	16.0382	18.1139		19.3622	1.60343
ENSGALG00000003155	ENSGALG00000003155	SRR	SRR	chr19:5527952-5625658	ENSG00000167720	SRR	chr17:2303383-2325260	13.4567	9.76672	7.65721	12.7379	16.2242	8.08779	12.5418	11.8852	10.1682	12.7839	9.81167	18.4033		11.9604	3.15814
ENSGALG00000003158	ENSGALG00000003158	COIL	COIL	chr18:6362779-6367874	ENSG00000121058	COIL	chr17:56938187-56961054	35.0477	35.303	38.7278	34.917	45.5608	34.5624	34.1485	33.9864	48.5464	39.973	40.3962	37.2201		38.1991	4.73808
ENSGALG00000003160	ENSGALG00000003160	-	CERS1	chr28:3746345-3756801	ENSG00000223802	CERS1	chr19:18868545-18896727	9.53391	9.90793	7.34909	6.72726	3.47871	5.74331	8.90175	11.5883	5.88497	7.12686	9.0028	11.1235		8.0307	2.39785
ENSGALG00000003161	ENSGALG00000003161	-	GDF3	chr28:3758226-3760332	ENSG00000130283	GDF1	chr19:18868545-18896096	70.747	69.0434	39.3741	66.9503	35.0205	26.3388	93.0121	125.846	70.4772	203.81	168.399	114.781		90.3166	54.2442
ENSGALG00000003162	ENSGALG00000003162	RETREG3	RETREG3	chr27:5398849-5404671	ENSG00000141699	RETREG3	chr17:42579513-42610623	21.2458	23.0433	25.675	22.9852	19.5201	27.4059	20.5122	23.1682	20.3888	18.9871	17.1461	19.2292		21.6089	2.95668
ENSGALG00000003163	ENSGALG00000003163	GNAO1	GNAO1	chr11:2264901-2382477	ENSG00000087258	GNAO1	chr16:56191347-56357457	3.14201	1.7096	0.585826	1.92787	1.62298	0.847009	1.62087	0.451203	0.359785	1.19563	2.12849	3.73498		1.61052	1.04234
ENSGALG00000003164	ENSGALG00000003164	-	ENSGALG00000003164	chr8:4681328-4689650	ENSG00000197959	DNM3	chr1:171841498-172418466	0.222399	0.428188	0.809219	0.125542	0.476072	0.919284	0.351836	0.414365	0.536917	0.293018	0.154007	0.388119		0.426581	0.240352
ENSGALG00000003165	ENSGALG00000003165	CCDC6	CCDC6	chr6:9099465-9144569	ENSG00000108091	CCDC6	chr10:59788763-59906656	11.3928	11.0714	8.82711	11.949	9.82898	9.65419	12.9258	10.4708	8.20576	12.0679	16.7657	12.5129		11.306	2.26252
ENSGALG00000003168	ENSGALG00000003168	MTMR12	MTMR12	chrZ:9711745-9742375	ENSG00000150712	MTMR12	chr5:32226994-32313009	1.66878	1.60646	2.13759	1.61488	1.74146	2.16175	1.46733	1.34766	0.981032	0.87498	1.69213	1.38679		1.55674	0.387428
ENSGALG00000003169	ENSGALG00000003169	CBFB	CBFB	chr11:2404977-2447419	ENSG00000067955	CBFB	chr16:67029116-67101058	106.209	107.313	85.9614	93.3187	115.687	80.5847	130.349	103.747	86.046	92.7817	108.109	91.28		100.116	14.3981
ENSGALG00000003172	ENSGALG00000003172	-	SLC16A9	chr6:9164999-9184327	ENSG00000165449	SLC16A9	chr10:59650761-59736002	7.17873	7.4908	6.92398	7.00903	7.10293	6.13245	7.74467	5.44461	6.89735	7.28131	4.63972	4.28424		6.51082	1.13538
ENSGALG00000003174	ENSGALG00000003174	RIMS3	RIMS3	chr23:4915860-4918547	ENSG00000117016	RIMS3	chr1:40620679-40665657	0	0.0546685	0.398553	0	0.0510816	0.158463	0.0505353	0.129867	0.112182	0.0480996	0	0		0.0836208	0.1128
ENSGALG00000003175	ENSGALG00000003175	STKLD1	STKLD1	chr17:7365890-7376849	ENSG00000198870	STKLD1	chr9:133376367-133406096	0.961439	0.919926	1.03585	0.888094	0.965423	0.802044	0.788152	1.15473	1.08191	1.24369	2.75995	1.42363		1.16874	0.533618
ENSGALG00000003176	ENSGALG00000003176	-	ENSGALG00000003176	chr6:9199145-9202263				0.0721157	0	0	0	0.185247	0	0	0	0	0.162882	0	0		0.0350204	0.0683111
ENSGALG00000003179	ENSGALG00000003179	ANGPTL7	ANGPTL7	chr21:4129576-4190653	ENSG00000171819	ANGPTL7	chr1:11189341-11195981	0.141947	0.0910972	0.0553377	0.240383	0	0.0880102	0	0.0721279	0.233651	0.280529	0	0.0825725		0.107138	0.0975179
ENSGALG00000003181	ENSGALG00000003181	SURF2	SURF2	chr17:7348591-7351670	ENSG00000148291	SURF2	chr9:133356552-133361169	133.178	132.153	115.637	137.491	165.664	112.132	140.548	161.468	161.869	157.193	106.3	156.163		139.983	20.8353
ENSGALG00000003183	ENSGALG00000003183	C16orf70	C11H16orf70	chr11:2452597-2486132	ENSG00000125149	C16orf70	chr16:67109958-67148539	16.7545	20.1753	30.4813	15.2728	20.8726	26.9676	16.3201	24.5779	29.0535	22.5426	21.9061	16.5883		21.7927	5.1497
ENSGALG00000003185	ENSGALG00000003185	SCPEP1	SCPEP1	chr18:6367936-6381362	ENSG00000121064	SCPEP1	chr17:56978105-57006768	12.7646	11.91	12.2858	14.0237	11.9753	12.4611	12.5537	12.0383	12.3294	13.7266	12.9134	13.5215		12.7086	0.707383
ENSGALG00000003189	ENSGALG00000003189	NFYC	NFYC	chr23:4927210-4955061	ENSG00000066136	NFYC	chr1:40691648-40771603	137.276	137.977	151.6	146.604	163.698	146.345	148.971	152.694	194.028	175.677	170.962	146.881		156.059	16.8851
ENSGALG00000003193	ENSGALG00000003193	CRABP-I	CRABP1	chr10:3636151-3675771	ENSG00000166426	CRABP1	chr15:78340324-78348230	39.7834	28.4258	36.5006	35.0287	36.5948	29.2856	41.1131	28.4297	35.3221	32.4559	18.0536	51.348		34.3618	8.20319
ENSGALG00000003194	ENSGALG00000003194	ATP6V0A2	ATP6V0A2	chr15:4955472-4970589	ENSG00000185344	ATP6V0A2	chr12:123712318-123761755	27.2025	28.4787	30.5241	29.4889	24.2936	28.2697	28.2302	26.0389	29.7418	28.1906	33.5382	29.0856		28.5902	2.2943
ENSGALG00000003195	ENSGALG00000003195	TRADD	TRADD	chr11:2506514-2520836	ENSG00000102871	TRADD	chr16:67154180-67160298	0.739987	0.914626	0.641073	0.556955	0.246405	0.509788	0.943031	0.835583	0.469176	0.711872	1.89788	0.892809		0.779932	0.408969
ENSGALG00000003196	ENSGALG00000003196	-	RNASE6	chr6:9290893-9300707	ENSG00000129538	RNASE1	chr14:20801228-20803278	0	0	0	0	0	0	0	0	0	0	0	0		0	0
ENSGALG00000003197	ENSGALG00000003197	RPL7A	RPL7A	chr17:7341075-7344697	ENSG00000148303	RPL7A	chr9:133348214-133351426	2842.91	3192.25	2974.9	3106.72	3499.54	2846.23	3101.33	3140.94	4260.19	3852.57	2856.63	3097.42		3230.97	435.035
ENSGALG00000003199	ENSGALG00000003199	Mlx	MLX	chr27:5390277-5396864	ENSG00000108788	MLX	chr17:42567068-42573239	87.3086	100.331	88.7588	95.1245	86.6502	90.9644	91.8026	87.8345	94.8405	84.8452	63.2805	87.9699		88.3092	9.02328
ENSGALG00000003201	ENSGALG00000003201	-	FBXL8	chr11:2506514-2520836	ENSG00000135722	FBXL8	chr16:67159931-67164570	2.28713	2.37551	1.72224	2.20987	2.36078	1.55505	2.32211	2.3911	2.30751	2.87106	5.75609	3.41491		2.63111	1.09184
ENSGALG00000003203	ENSGALG00000003203	-	ENSGALG00000003203	chr12:2634370-2635472				0.98457	0.895146	3.26258	0.926301	1.10648	1.93311	1.46024	1.45919	3.56543	4.30856	1.59086	1.57503		1.92229	1.14578
ENSGALG00000003204	ENSGALG00000003204	MED22	MED22	chr17:7334677-7340953	ENSG00000148297	MED22	chr9:133338323-133348131	78.0681	84.151	90.2556	84.1446	90.155	82.1718	78.1852	80.8323	86.9734	73.6113	72.8488	86.7176		82.3429	5.83862
ENSGALG00000003205	ENSGALG00000003205	EIF4EBP1	EIF4EBP1	chr22:2270715-2275385	ENSG00000187840	EIF4EBP1	chr8:38030341-38060365	287.924	264.292	271.424	331.56	306.021	248.785	333.703	384.282	361.405	483.608	389.739	392.679		337.952	68.0728
ENSGALG00000003206	ENSGALG00000003206	METTL13	METTL13	chr8:4714482-4718914	ENSG00000010165	METTL13	chr1:171781664-171814023	13.4655	21.5268	12.9006	11.4336	12.6345	12.3984	12.8197	12.1768	12.3168	11.4916	7.70537	12.214		12.757	3.12288
ENSGALG00000003208	ENSGALG00000003208	GABARAPL2	GABARAPL2	chr11:20146840-20159743	ENSG00000034713	GABARAPL2	chr16:75566351-75577881	31.7607	31.398	32.2181	30.5518	28.1166	28.0102	30.9756	32.3858	30.7478	30.7301	26.81	31.3102		30.4179	1.79186
ENSGALG00000003209	ENSGALG00000003209	-	ENSGALG00000003209	chr22:2278952-2281437	ENSG00000156574	NODAL	chr10:70432315-70447951	2.07844	8.71105	2.6458	0.430993	6.21063	0.894185	7.90147	55.953	12.1208	105.385	14.9215	12.436		19.1407	30.9747
ENSGALG00000003211	ENSGALG00000003211	POLDIP2	POLDIP2	chr19:5625852-5635244	ENSG00000004142	POLDIP2	chr17:28347177-28357522	74.963	79.9216	70.8084	73.3731	70.963	84.2954	76.3307	87.5809	72.6611	68.047	69.7161	83.6028		76.0219	6.39888
ENSGALG00000003212	ENSGALG00000003212	TSPO2	TSPO2	chr26:4677807-4737458	ENSG00000112212	TSPO2	chr6:41042554-41044337	0.365104	0.375312	0.423719	0.255616	0.469577	0.586077	0.433659	0.19174	0.32298	0.20457	0.130648	0.466965		0.352164	0.135146
ENSGALG00000003213	ENSGALG00000003213	LGALS2	LGALS2	chr1:51250967-51253146	ENSG00000100079	LGALS2	chr22:37570246-37582616	3.64039	3.61714	1.19808	5.66318	2.85251	1.18942	3.58814	2.59743	3.15129	5.31627	2.97242	3.05577		3.23684	1.33679
ENSGALG00000003217	ENSGALG00000003217	LITAF	LITAF	chr14:926663-933480	ENSG00000189067	LITAF	chr16:11547722-11636381	64.2249	129.879	83.9816	54.2557	92.2984	99.2757	127.402	250.031	184.932	187.432	23.241	26.1394		110.258	69.2717
ENSGALG00000003219	ENSGALG00000003219	-	TMEM231	chr11:20146840-20159743	ENSG00000260092	AC009163.2	chr16:75528532-75545428	13.3649	16.2969	20.8836	13.1823	18.0107	20.2513	14.7241	16.9367	16.5645	11.8001	10.4074	11.768		15.3492	3.3778
ENSGALG00000003220	ENSGALG00000003220	UPF1	UPF1	chr28:3764044-3781142	ENSG00000005007	UPF1	chr19:18831938-18868236	65.3457	63.794	51.86	55.333	46.2157	66.0806	57.5959	65.3609	32.8872	41.6947	36.8897	49.9333		52.7492	11.5493
ENSGALG00000003221	ENSGALG00000003221	WDR61	WDR61	chr10:3636151-3675771	ENSG00000140395	WDR61	chr15:78277835-78299794	81.22	93.3686	111.116	88.9557	112.701	101.875	92.2735	98.5512	126.302	107.806	77.1444	77.8829		97.433	15.2376
ENSGALG00000003224	ENSGALG00000003224	HSF4	HSF4	chr11:2521435-2536119	ENSG00000102878	HSF4	chr16:67164681-67169945	0	0	0	0	0	0	0	0	0.0296623	0.0254382	0.0935906	0		0.0123909	0.0277058
ENSGALG00000003226	ENSGALG00000003226	APOBEC2	APOBEC2	chr26:4677807-4737458	ENSG00000124701	APOBEC2	chr6:41053304-41064511	2.70694	1.58833	1.48746	2.85235	1.05957	1.69435	2.17178	1.75538	0.509228	0.756966	0.96403	2.21953		1.64716	0.745935
ENSGALG00000003227	ENSGALG00000003227	RAB11FIP4	RAB11FIP4	chr18:6382935-6470026	ENSG00000131242	RAB11FIP4	chr17:31391624-31538217	14.3838	14.2527	13.1467	14.9713	17.9476	16.5104	12.5407	15.3966	13.0733	11.2317	9.01011	14.5157		13.9151	2.36353
ENSGALG00000003228	ENSGALG00000003228	OARD1	OARD1	chr26:4677807-4737458	ENSG00000124596	OARD1	chr6:41033627-41097787	51.3544	41.9085	42.1964	58.6034	48.8193	35.8442	47.1945	40.9408	42.1621	37.9035	42.6969	57.9461		45.6308	7.31811
ENSGALG00000003233	ENSGALG00000003233	ASH2L	ASH2L	chr22:2281514-2291815	ENSG00000129691	ASH2L	chr8:38105242-38144076	58.8291	61.5818	55.1556	60.8595	62.0005	60.6426	62.0662	67.7194	68.6194	69.5567	65.7976	69.6138		63.5368	4.65055
ENSGALG00000003235	ENSGALG00000003235	-	ENSGALG00000003235	chrZ:9754435-9773284	ENSG00000056097	ZFR	chr5:32354350-32444761	19.5549	16.4127	14.377	16.5247	16.6119	20.4078	18.255	15.5613	7.88759	9.4502	10.3492	12.9468		14.8616	3.99102
ENSGALG00000003238	ENSGALG00000003238	-	GNA11	chr28:1250361-1263195				84.1356	80.0892	67.5173	84.1212	79.2937	65.7001	81.1137	71.609	62.78	70.2964	83.4276	92.3042		76.8657	9.05784
ENSGALG00000003241	ENSGALG00000003241	CCDC28B	CCDC28B	chr23:5177193-5181209	ENSG00000160050	CCDC28B	chr1:32200386-32205387	11.0727	9.35448	11.1186	9.38233	9.21379	10.4089	9.09293	10.2059	16.8274	13.9726	14.8766	12.9791		11.5421	2.54709
ENSGALG00000003242	ENSGALG00000003242	STAR	STAR	chr22:2281514-2291815	ENSG00000147465	STAR	chr8:38143649-38151265	1.02645	1.31749	0.875823	0.918331	0.870605	0.696463	0.735326	1.39743	0.63758	1.29041	1.15337	1.50965		1.03574	0.292961
ENSGALG00000003243	ENSGALG00000003243	RAD54L2	RAD54L2	chr12:2636974-2674730	ENSG00000164080	RAD54L2	chr3:51541144-51668667	17.2808	16.5511	17.873	14.6758	15.719	18.3784	15.2344	17.3592	16.9851	14.9813	16.9429	16.627		16.5507	1.16879
ENSGALG00000003245	ENSGALG00000003245	LSM1	LSM1	chr22:2293640-2294969	ENSG00000175324	LSM1	chr8:38163321-38176730	81.4031	90.5363	105.631	89.6253	115.333	83.8372	77.9009	78.8918	156.722	127.57	111.479	99.6275		101.546	23.5212
ENSGALG00000003246	ENSGALG00000003246	-	ENSGALG00000003246	chr23:5183005-5185861	ENSG00000084652	TXLNA	chr1:32179686-32198285	57.7409	57.8456	52.9847	56.1122	57.6097	49.816	56.6985	53.0333	62.5533	69.6935	65.5929	59.4474		58.2607	5.54898
ENSGALG00000003247	ENSGALG00000003247	NFYA	NFYA	chr26:4677807-4737458	ENSG00000001167	NFYA	chr6:41072945-41099976	18.1302	17.4184	13.9389	17.3087	13.3592	12.4391	17.0121	13.2775	10.0111	12.6335	15.1058	19.2129		14.9873	2.8061
ENSGALG00000003248	ENSGALG00000003248	-	SUB1	chrZ:9801317-9816323	ENSG00000113387	SUB1	chr5:32531633-32604079	125.285	140.421	159.232	146.157	153.927	145.195	155.955	140.94	161.32	139.148	122.219	124.448		142.854	13.5393
ENSGALG00000003249	ENSGALG00000003249	CWF19L1	CWF19L1	chr6:9308662-9344610	ENSG00000095485	CWF19L1	chr10:100232298-100267680	72.7147	70.4194	72.3577	79.4321	85.681	75.1537	78.8412	79.8765	91.5879	83.824	61.6408	69.7133		76.7702	8.13135
ENSGALG00000003250	ENSGALG00000003250	ITPA	ITPA	chr8:4719327-4722976	ENSG00000125877	ITPA	chr20:3208868-3223870	90.6428	98.8533	107.039	92.8487	101.434	90.7819	99.4931	115.45	152.118	120.922	112.953	110.334		107.739	17.1236
ENSGALG00000003254	ENSGALG00000003254	BAG4	BAG4	chr22:2295194-2297365	ENSG00000156735	BAG4	chr8:38176533-38213301	33.7574	41.792	39.4831	34.1512	33.8793	40.6049	40.4432	40.7201	53.798	43.8176	57.5079	39.4136		41.614	7.3594
ENSGALG00000003256	ENSGALG00000003256	ATP6V0A1	ATP6V0A1	chr27:5352968-5386409	ENSG00000033627	ATP6V0A1	chr17:42458844-42522611	63.4239	71.6302	54.0048	57.6702	54.1705	50.3575	55.7584	49.7737	56.7619	57.8724	83.8299	72.8814		60.6779	10.3624
ENSGALG00000003258	ENSGALG00000003258	DNAAF1	DNAAF1	chr11:2540320-2553499	ENSG00000154099	DNAAF1	chr16:84145287-84178767	1.95841	2.22365	2.4731	2.82632	2.93545	2.66851	2.14543	2.79504	2.54842	1.55692	2.00308	1.99929		2.34447	0.427124
ENSGALG00000003259	ENSGALG00000003259	EIF2B1	EIF2B1	chr15:4984383-4988102	ENSG00000111361	EIF2B1	chr12:123620406-123633766	94.7017	96.3459	96.4992	102.612	120.781	94.8443	101.292	104.345	135.472	121.584	81.9452	107.388		104.818	14.665
ENSGALG00000003260	ENSGALG00000003260	UTP6	UTP6	chr18:6643045-6652817	ENSG00000108651	UTP6	chr17:31860899-31901765	130.987	136.903	139.195	142.108	154.464	127.644	139.588	148.114	162.401	140.708	100.417	137.882		138.368	15.2716
ENSGALG00000003261	ENSGALG00000003261	CAVIN1	CAVIN1	chr27:5335536-5350085	ENSG00000177469	CAVIN1	chr17:42402452-42423517	18.7403	18.0143	7.8871	16.0237	15.772	11.7307	15.569	10.9981	10.342	11.1792	17.1117	15.6416		14.0841	3.48296
ENSGALG00000003265	ENSGALG00000003265	PTP4A2	PTP4A2	chr23:5077319-5094760	ENSG00000184007	PTP4A2	chr1:31906421-31944856	160.293	158.206	160.673	171.185	182.485	144.515	169.97	162.094	200.881	184.691	203.724	202.526		175.104	19.637
ENSGALG00000003267	ENSGALG00000003267	STAT3	STAT3	chr27:5319500-5330786	ENSG00000168610	STAT3	chr17:42313324-42388568	85.6291	66.8841	42.6563	75.8634	53.8539	53.5984	72.9607	43.1104	44.6922	51.2187	43.0397	69.8066		58.6095	14.9567
ENSGALG00000003272	ENSGALG00000003272	KHDRBS1	KHDRBS1	chr23:5096858-5111703	ENSG00000121774	KHDRBS1	chr1:32013829-32060850	70.5888	74.6475	95.8656	63.6083	79.938	91.4348	69.1185	76.5508	78.3221	74.5649	63.9724	63.2696		75.1568	10.3851
ENSGALG00000003273	ENSGALG00000003273	HSDL1	HSDL1	chr11:2554020-2560166	ENSG00000103160	HSDL1	chr16:84122146-84145192	22.899	19.6923	17.0083	27.7222	21.7097	20.8425	29.8799	21.0082	21.0303	17.7775	13.1286	24.1832		21.4068	4.53582
ENSGALG00000003277	ENSGALG00000003277	SUZ12	SUZ12	chr18:6661441-6678625	ENSG00000178691	SUZ12	chr17:31937018-32001045	14.2867	16.6481	14.5987	13.4412	14.2085	15.387	12.3536	11.8738	9.17328	7.24873	10.4875	12.3199		12.6689	2.69241
ENSGALG00000003281	ENSGALG00000003281	GSS	GSS	chr20:2756160-2764123	ENSG00000100983	GSS	chr20:34928430-34955817	31.3442	43.3584	51.3702	30.2892	40.1977	43.2168	30.9854	37.0579	56.6614	45.7887	107.022	35.0225		46.0262	20.894
ENSGALG00000003282	ENSGALG00000003282	STAT5B	STAT5B	chr27:5292831-5306850	ENSG00000126561	STAT5A	chr17:42287547-42311943	25.7671	28.1608	28.7716	21.6445	22.4984	25.2157	22.7634	27.9714	31.8913	26.7886	29.3168	20.2163		25.9172	3.54597
ENSGALG00000003283	ENSGALG00000003283	COMP	COMP	chr28:3800420-3815388	ENSG00000105664	COMP	chr19:18782773-18791314	0.610979	0.647831	0.455667	0.569822	0.511776	0.34588	0.472778	0.701908	0.489733	0.584988	0.570254	0.525397		0.540584	0.0951335
ENSGALG00000003284	ENSGALG00000003284	CRLF3	CRLF3	chr18:6682423-6695680	ENSG00000176390	CRLF3	chr17:30769388-30824776	26.9835	35.0456	36.5652	24.4248	26.1666	33.2352	26.0527	30.8624	36.0162	27.9451	24.5802	21.8579		29.1446	5.02298
ENSGALG00000003285	ENSGALG00000003285	CDHR2	CDHR2	chr13:10364595-10375987	ENSG00000074276	CDHR2	chr5:176542511-176595974	3.50924	4.88503	5.10484	3.17693	5.31462	4.22769	3.34355	4.15102	7.05512	8.05064	4.43861	4.31178		4.79742	1.46339
ENSGALG00000003286	ENSGALG00000003286	ACSBG1	ACSBG1	chr10:3686192-3715339	ENSG00000103740	ACSBG1	chr15:78167468-78245688	0.406821	0.22845	0.49562	0.487999	0.261254	0.441417	0.407272	0.245479	0.334823	0.215357	0.404966	0.35498		0.357036	0.0997727
ENSGALG00000003287	ENSGALG00000003287	TMEM39B	TMEM39B	chr23:5118150-5125207	ENSG00000121775	TMEM39B	chr1:32072031-32102866	43.5564	44.9734	43.775	44.8572	38.6978	43.3019	41.3397	47.2107	52.8823	41.1311	27.6556	49.5156		43.2414	6.22091
ENSGALG00000003288	ENSGALG00000003288	TARS	TARS	chrZ:10102158-10116869	ENSG00000113407	TARS	chr5:33440696-33469539	59.467	58.389	73.7143	63.1029	65.2875	78.9291	68.6185	55.5882	79.6895	61.7578	31.6027	46.4832		61.8858	13.5439
ENSGALG00000003289	ENSGALG00000003289	CHUK	CHUK	chr6:9308662-9344610	ENSG00000213341	CHUK	chr10:100188298-100229619	26.4935	30.3647	27.31	28.4494	29.6285	29.9487	29.8844	31.5055	34.4846	31.5011	24.9724	29.7004		29.5203	2.51286
ENSGALG00000003293	ENSGALG00000003293	MBTPS1	MBTPS1	chr11:2563344-2592411	ENSG00000140943	MBTPS1	chr16:84053761-84116906	17.6633	19.7303	18.0461	16.3512	18.8453	18.2445	15.7862	17.7274	16.7512	15.561	16.2418	14.457		17.1171	1.51885
ENSGALG00000003294	ENSGALG00000003294	ATAD5	ATAD5	chr18:6696137-6712562	ENSG00000176208	ATAD5	chr17:30831970-30895869	8.9891	8.55302	9.00764	9.72678	10.8856	7.21508	9.24164	9.55295	8.70725	7.6835	6.84888	8.10577		8.70977	1.13092
ENSGALG00000003295	ENSGALG00000003295	-	ENSGALG00000003295	chrZ:10174898-10197420				0.290237	0.0620885	0	0.436896	0.0621286	0.359907	0.344366	0.0491597	0	0.218512	0.200983	0.112557		0.17807	0.151859
ENSGALG00000003297	ENSGALG00000003297	HDAC1	HDAC1	chr23:5137851-5158527	ENSG00000116478	HDAC1	chr1:32292086-32333635	62.9645	76.4122	79.838	58.9913	76.495	77.9119	63.7794	74.1901	72.899	69.5608	64.8288	61.6659		69.9614	7.22625
ENSGALG00000003298	ENSGALG00000003298	DDX55	DDX55	chr15:4988118-4994687	ENSG00000111364	DDX55	chr12:123602077-123620941	33.7718	39.2836	38.2145	37.1382	47.8324	36.3331	35.9952	38.4477	43.671	38.1792	38.2505	34.1923		38.4425	3.9126
ENSGALG00000003299	ENSGALG00000003299	NSD3	NSD3	chr22:2316114-2337687	ENSG00000147548	NSD3	chr8:38269697-38382272	8.35325	7.52419	6.45537	7.3192	7.37714	9.8084	8.12186	7.18947	3.92296	4.64158	6.57279	7.34471		7.05258	1.57038
ENSGALG00000003301	ENSGALG00000003301	FAM167B	FAM167B	chr23:5160099-5160357	ENSG00000183615	FAM167B	chr1:32247233-32248856	0.452172	1.16076	2.82046	0	1.16151	0	1.073	0.919056	1.19087	1.53193	1.87872	0		1.01571	0.840269
ENSGALG00000003302	ENSGALG00000003302	SLC38A8	SLC38A8	chr11:2563344-2592411	ENSG00000166558	SLC38A8	chr16:84009667-84042636	0.0247582	0.0318695	0	0.0559031	0.0317987	0	0.0293756	0	0.0652051	0	0	1.49e-11		0.0199092	0.0235933
ENSGALG00000003304	ENSGALG00000003304	CRTC1	CRTC1	chr28:3825549-3857837	ENSG00000105662	CRTC1	chr19:18683677-18782333	32.7668	30.9429	29.1381	32.0376	29.2447	32.2303	29.7126	38.8365	36.8747	35.3915	35.1067	38.7549		33.4198	3.51449
ENSGALG00000003307	ENSGALG00000003307	TMED2	TMED2	chr15:4995018-5000995	ENSG00000086598	TMED2	chr12:123584531-123598577	209.571	207.554	234.941	222.273	214.747	207.584	235.04	224.862	235.747	231.686	208.822	222.118		221.245	11.3579
ENSGALG00000003308	ENSGALG00000003308	ERLIN1	ERLIN1	chr6:9344754-9360945	ENSG00000107566	ERLIN1	chr10:100150094-100188334	77.4236	77.9811	81.1374	77.0305	63.1067	75.2715	76.263	74.9261	85.1116	76.9232	77.764	82.9653		77.1587	5.40023
ENSGALG00000003309	ENSGALG00000003309	NECAB2	NECAB2	chr11:2592485-2644422	ENSG00000103154	NECAB2	chr16:83968632-84002776	1.90674	0.624864	0.316315	2.45039	1.27659	0.704304	1.75693	0.742121	0.77463	2.19912	4.21399	5.05031		1.83469	1.48325
ENSGALG00000003310	ENSGALG00000003310	SLC45A2	SLC45A2	chrZ:10331274-10346085	ENSG00000164175	SLC45A2	chr5:33944616-33984730	0.0170434	0.0218758	0	0.0192416	0	0.0211345	0	0	0	0	0	0		0.00660794	0.00982555
ENSGALG00000003313	ENSGALG00000003313	-	ENSGALG00000003313	chr23:5162259-5165312				0.122955	0.26303	0.415427	0.277628	0.28952	0.15247	0.0972575	0.312388	0.323824	1.50426	2.46918	0.357624		0.548797	0.708798
ENSGALG00000003314	ENSGALG00000003314	RILPL1	RILPL1	chr15:5010025-5020830	ENSG00000188026	RILPL1	chr12:123470054-123533718	29.2806	31.7417	37.5732	22.1842	33.8011	44.4023	25.4073	28.6814	21.9269	20.5174	23.8918	22.2455		28.4711	7.33103
ENSGALG00000003318	ENSGALG00000003318	SNRNP35	SNRNP35	chr15:5023907-5025606	ENSG00000184209	SNRNP35	chr12:123457641-123473154	14.055	16.6302	15.3771	15.2477	19.655	14.5807	11.8185	11.5436	18.5739	16.831	22.8539	16.1486		16.1096	3.1912
ENSGALG00000003319	ENSGALG00000003319	ADAP2	ADAP2	chr18:6713488-6719964	ENSG00000184060	ADAP2	chr17:30906344-30959322	1.32901	1.32347	1.45836	1.07221	0.975889	1.07672	1.83509	1.84767	2.09066	1.44021	1.20255	0.757655		1.36746	0.394664
ENSGALG00000003321	ENSGALG00000003321	RILPL2	RILPL2	chr15:5025786-5028892	ENSG00000150977	RILPL2	chr12:123410683-123436717	32.6999	39.9674	50.5623	31.1622	48.7233	43.9664	30.9515	36.7324	63.4416	46.0049	37.9097	31.3649		41.1239	9.89346
ENSGALG00000003322	ENSGALG00000003322	TBC1D2B	TBC1D2B	chr10:3781093-3800952	ENSG00000167202	TBC1D2B	chr15:77984036-78077724	2.12534	1.14507	1.8617	2.04399	1.73556	3.0585	1.99246	1.61327	1.08839	1.24453	3.88834	2.35057		2.01231	0.808833
ENSGALG00000003323	ENSGALG00000003323	OSGIN1	OSGIN1	chr11:2658955-2694119	ENSG00000140961	OSGIN1	chr16:83948282-83966332	0.0867028	0.0713861	0.0738818	0.11004	0.0178585	0.0172422	0.0300663	0.0257563	0	0.214634	0.231098	0.225136		0.0919835	0.0858079
ENSGALG00000003324	ENSGALG00000003324	PRRX1	PRRX1	chr8:4848541-4880892	ENSG00000116132	PRRX1	chr1:170662728-170739419	1.15635	0.59531	0.891568	1.08255	0.703145	0.70888	0.710529	0.353804	0.731436	1.3564	1.57331	0.955443		0.90156	0.343056
ENSGALG00000003325	ENSGALG00000003325	KMT5A	KMT5A	chr15:5032732-5039363	ENSG00000183955	KMT5A	chr12:123383773-123409358	22.4053	21.052	12.1344	18.9335	21.6687	12.8104	19.8583	17.35	8.52439	10.6437	19.3708	26.223		17.5812	5.38989
ENSGALG00000003326	ENSGALG00000003326	AMACR	AMACR	chrZ:10347476-10368417	ENSG00000242110	AMACR	chr5:33986178-34008108	13.6221	12.3968	10.5341	17.3961	9.22596	10.9383	18.1278	11.4608	10.4884	12.4204	10.7475	14.3328		12.6409	2.78407
ENSGALG00000003329	ENSGALG00000003329	GORAB	GORAB	chr8:4901369-4910290	ENSG00000120370	GORAB	chr1:170532129-170553446	14.9348	15.0158	16.9338	15.2407	14.7994	15.8502	14.5874	15.6043	17.8659	16.5296	19.0902	14.54		15.916	1.43102
ENSGALG00000003331	ENSGALG00000003331	FAF2	FAF2	chr13:10392763-10407179	ENSG00000113194	FAF2	chr5:176447628-176510074	88.0415	88.2821	94.0723	93.2619	105.139	94.1955	91.7865	92.0533	120.42	110.693	104.057	88.169		97.5143	10.292
ENSGALG00000003333	ENSGALG00000003333	GHDC	GHDC	chr27:5292831-5306850	ENSG00000167925	GHDC	chr17:42188799-42194532	0.674831	1.14984	1.10619	0.99946	1.17963	1.52916	0.886688	0.648513	2.06026	1.42627	1.09827	0.774713		1.12782	0.399811
ENSGALG00000003334	ENSGALG00000003334	METTL11B	METTL11B	chr8:4976798-4993570	ENSG00000203740	METTL11B	chr1:170146001-170167790	0.10378	0	0.0809171	0.234332	0.0666461	0.0643461	0.24627	0.158203	0.0683308	0.2344	0.215597	0.120741		0.132797	0.0828697
ENSGALG00000003336	ENSGALG00000003336	DAPK2	DAPK2	chr10:3814180-3850001	ENSG00000035664	DAPK2	chr15:63907036-64072033	1.6563	1.55015	2.4752	1.12975	2.17162	2.22504	0.900714	1.47284	0.817903	1.05214	1.57706	1.12407		1.51273	0.544629
ENSGALG00000003337	ENSGALG00000003337	EIF3I	EIF3I	chr23:5166290-5172814	ENSG00000084623	EIF3I	chr1:32221928-32231604	584.512	618.252	611.326	655.334	764.243	621.956	674.606	658.671	800.849	727.084	543.773	637.756		658.197	74.2627
ENSGALG00000003339	ENSGALG00000003339	MTOR	MTOR	chr21:4129576-4190653	ENSG00000198793	MTOR	chr1:11106535-11262507	9.93075	8.27433	8.43081	7.80794	8.11855	10.488	8.76269	9.54532	6.34675	6.90992	6.80399	6.35125		8.14752	1.38198
ENSGALG00000003340	ENSGALG00000003340	GBGT1	GBGT1	chr17:7305764-7312958	ENSG00000148288	GBGT1	chr9:133152948-133163945	0.110356	0.103015	0.0156444	0.158568	0.0386557	0.0497622	0.0952268	0.101955	0.0924766	0.181274	0.236205	0.116719		0.108321	0.0615249
ENSGALG00000003344	ENSGALG00000003344	CLTB	CLTB	chr13:10407213-10414162	ENSG00000175416	CLTB	chr5:176392455-176416569	44.6296	45.4777	32.2264	39.949	48.4672	35.8332	48.1606	42.0398	38.6056	55.6806	70.3153	54.4135		46.3165	10.3022
ENSGALG00000003345	ENSGALG00000003345	-	ENSGALG00000003345	chr27:5282574-5292696				0.539221	0.683234	1.47985	0.294712	0.403309	1.01213	0.470657	0.519849	1.20114	0.858413	0.881566	0.47395		0.734836	0.358633
ENSGALG00000003348	ENSGALG00000003348	-	ENSGALG00000003348	chr13:10415327-10415928	ENSG00000175202	HIGD2B	chr15:72675783-72686149	93.7314	81.9313	101.39	92.8279	69.4885	87.3941	101.217	100.32	156.552	141.225	116.176	128.099		105.863	25.3108
ENSGALG00000003349	ENSGALG00000003349	PLEKHA2	PLEKHA2	chr22:2434909-2444309	ENSG00000169499	PLEKHA2	chr8:38901235-38973909	8.70415	18.4547	11.2942	4.24616	6.34876	7.48885	16.6259	22.7587	15.2543	21.6011	16.5197	10.1517		13.2874	6.1
ENSGALG00000003353	ENSGALG00000003353	RAI14	RAI14	chrZ:10460207-10544773	ENSG00000039560	RAI14	chr5:34656237-34832627	1.23037	1.26462	1.79074	2.12702	1.64179	2.8739	1.31036	1.26606	1.19793	1.06403	2.37031	1.20928		1.6122	0.570199
ENSGALG00000003354	ENSGALG00000003354	KCNH4	KCNH4	chr27:5260324-5279941	ENSG00000089558	KCNH4	chr17:42156891-42181278	0.224939	0.3213	0.390352	0.171585	0.137789	0.177378	0.159111	0.172625	0.36979	0.363462	0.532414	0.272367		0.274426	0.122101
ENSGALG00000003355	ENSGALG00000003355	NOP16	NOP16	chr13:10416076-10418143	ENSG00000048162	NOP16	chr5:176383938-176388975	253.197	263.159	223.058	270.309	326.114	239.654	269.118	272.079	315.228	296.254	209.956	294.836		269.414	35.1107
ENSGALG00000003356	ENSGALG00000003356	TM2D2	TM2D2	chr22:2448284-2449185	ENSG00000169490	TM2D2	chr8:38988808-38996824	49.5494	51.0979	61.5253	37.3203	42.6395	45.3994	59.0433	72.9684	82.0988	84.1357	77.1896	51.9403		59.5757	16.0056
ENSGALG00000003357	ENSGALG00000003357	FKBP8	FKBP8	chr28:3904698-3910020	ENSG00000105701	FKBP8	chr19:18531751-18544077	51.1866	55.2503	49.9296	53.4083	52.0702	48.1965	53.493	51.379	65.8105	59.2101	50.4301	62.3685		54.3944	5.38069
ENSGALG00000003358	ENSGALG00000003358	UBIAD1	UBIAD1	chr21:4191523-4197035	ENSG00000120942	UBIAD1	chr1:11273206-11296049	18.1672	19.1781	16.7298	18.1201	16.1427	15.4534	17.3572	15.9717	13.9685	15.3412	16.6296	18.458		16.7931	1.52068
ENSGALG00000003359	ENSGALG00000003359	RAB5C	RAB5C	chr27:5260324-5279941	ENSG00000108774	RAB5C	chr17:42124976-42155044	58.5199	55.3049	53.5449	58.1314	53.0185	47.692	59.7338	53.3956	54.1447	60.2605	75.9937	74.0588		58.6499	8.41664
ENSGALG00000003360	ENSGALG00000003360	ARL10	ARL10	chr13:10418402-10420966	ENSG00000175414	ARL10	chr5:176365468-176401865	2.97424	3.5885	1.60784	2.68629	2.13921	2.31127	3.01135	3.18383	2.27162	1.85856	1.12592	1.8455		2.38368	0.723186
ENSGALG00000003361	ENSGALG00000003361	-	TREM-B1	chr26:4741375-4747862				0.35406	0.265138	0.368108	0.266259	0.120754	0.256166	0.559378	0.299748	0.339721	0.266562	0.122974	0.308974		0.293987	0.114782
ENSGALG00000003362	ENSGALG00000003362	ACSS2	ACSS2	chr20:2766640-2796869	ENSG00000131069	ACSS2	chr20:34872146-34927962	9.17107	10.2687	5.97889	7.73702	7.71621	8.6479	7.21778	6.30494	4.65135	6.68237	12.2718	8.60532		7.93778	2.04885
ENSGALG00000003365	ENSGALG00000003365	RAD1	RAD1	chrZ:10557698-10563478	ENSG00000113456	RAD1	chr5:34905264-34918989	34.841	39.7004	36.8496	60.4771	44.0392	54.7017	60.0116	46.3403	66.3712	50.4462	32.4289	49.2378		47.9538	10.9426
ENSGALG00000003369	ENSGALG00000003369	KAT2A	KAT2A	chr27:5249879-5255688	ENSG00000108773	KAT2A	chr17:42113108-42121358	42.7131	50.6604	44.5581	38.776	39.2728	41.8571	41.0911	45.7446	52.4269	42.192	38.3318	42.4677		43.341	4.42728
ENSGALG00000003370	ENSGALG00000003370	KIAA1191	KIAA1191	chr13:10421721-10429431	ENSG00000122203	KIAA1191	chr5:176346061-176361968	45.5185	46.1602	32.5465	45.0978	40.1083	40.1845	45.0905	42.5203	36.8533	40.9153	43.4177	45.9229		42.028	4.16046
ENSGALG00000003373	ENSGALG00000003373	BRIX1	BRIX1	chrZ:10563581-10567349	ENSG00000113460	BRIX1	chr5:34915376-34925996	186.566	227.971	216.552	277.553	291.805	269.929	296.496	246.377	308.098	265.442	186.213	222.394		249.616	41.724
ENSGALG00000003374	ENSGALG00000003374	ESRP2	ESRP2	chr11:3355581-3399130	ENSG00000103067	ESRP2	chr16:68229111-68238102	56.1772	59.126	54.1394	55.5255	50.3083	59.1163	53.1431	52.9114	37.8712	36.9817	35.4429	44.383		49.5938	8.6798
ENSGALG00000003377	ENSGALG00000003377	SIMC1	SIMC1	chr13:10431192-10453289	ENSG00000170085	SIMC1	chr5:176238367-176345991	13.1469	15.151	12.3104	12.2377	11.3826	11.4934	10.9118	12.5128	13.0231	10.8852	16.1729	13.2272		12.7046	1.61621
ENSGALG00000003378	ENSGALG00000003378	USP42	USP42	chr14:945678-958416	ENSG00000106346	USP42	chr7:6104884-6161564	11.0946	9.53942	11.3066	9.2568	10.7216	14.6988	10.7463	15.0054	10.1997	8.99868	8.20257	6.89052		10.5551	2.37649
ENSGALG00000003381	ENSGALG00000003381	HERC1	HERC1	chr10:3890205-3967151	ENSG00000103657	HERC1	chr15:63608618-63833942	5.36999	3.79267	4.4648	4.31465	4.30631	5.67969	4.24766	5.03804	3.10077	3.62875	3.45743	3.39654		4.23311	0.811388
ENSGALG00000003383	ENSGALG00000003383	KPNA6	KPNA6	chr23:5189900-5205960	ENSG00000025800	KPNA6	chr1:32108038-32176568	32.0728	37.9523	34.0411	30.8218	32.3445	32.9476	30.4792	35.0195	33.3037	32.7851	29.757	31.137		32.7218	2.24167
ENSGALG00000003385	ENSGALG00000003385	LSM4	LSM4	chr28:3982168-3987362	ENSG00000130520	LSM4	chr19:18306230-18323274	133.728	150.496	165.647	141.193	187.82	158.26	155.865	151.212	164.96	149.719	127.34	138.822		152.088	16.3257
ENSGALG00000003387	ENSGALG00000003387	DNAJC21	DNAJC21	chrZ:10568207-10582270	ENSG00000168724	DNAJC21	chr5:34929593-34958964	25.161	23.3561	18.6743	27.6152	23.9438	22.1433	27.7373	22.8298	19.0689	17.4564	25.7897	27.6673		23.4536	3.59528
ENSGALG00000003391	ENSGALG00000003391	EIF2AK1	EIF2AK1	chr14:960220-976442	ENSG00000086232	EIF2AK1	chr7:6022244-6059230	33.6716	38.1647	31.6434	37.2359	42.084	33.6458	36.4217	40.631	36.9974	33.7574	23.8245	32.0519		35.0108	4.79496
ENSGALG00000003392	ENSGALG00000003392	SBNO1	SBNO1	chr15:5043163-5072326	ENSG00000139697	SBNO1	chr12:123289109-123364843	57.1637	57.9593	53.3428	56.423	57.5287	58.4213	54.4353	52.1287	40.321	37.6179	38.9598	49.731		51.1694	7.81287
ENSGALG00000003396	ENSGALG00000003396	NFATC3	NFATC3	chr11:3421758-3524368	ENSG00000072736	NFATC3	chr16:68084751-68229259	46.496	40.7119	43.1457	53.4582	51.2623	47.4304	50.9865	46.3759	49.4497	45.1542	38.2505	44.5957		46.4431	4.46209
ENSGALG00000003397	ENSGALG00000003397	RHOT1	RHOT1	chr18:6724488-6747758	ENSG00000126858	RHOT1	chr17:32142454-32253374	34.7795	36.4441	30.279	33.0699	29.8353	34.3593	33.2059	30.4923	25.6765	25.2763	24.6088	29.5339		30.6301	3.91904
ENSGALG00000003398	ENSGALG00000003398	ADAM9	ADAM9	chr22:2453218-2473529	ENSG00000168615	ADAM9	chr8:38996869-39105144	8.67942	9.31869	13.4495	6.43246	5.70525	7.87756	11.5692	15.7967	17.198	20.5745	19.3729	9.09763		12.0893	5.0969
ENSGALG00000003400	ENSGALG00000003400	AIMP2	AIMP2	chr14:976633-979055	ENSG00000106305	AIMP2	chr7:6009245-6023834	161.378	194.57	199.009	182.235	197.18	187.768	192.535	215.583	271.418	219.047	165.085	184.334		197.512	28.8371
ENSGALG00000003401	ENSGALG00000003401	FBXL22	FBXL22	chr10:3970794-3974084	ENSG00000197361	FBXL22	chr15:63597353-63602428	1.25247	0.803795	1.36716	2.05032	1.36733	0.931868	1.48605	2.35475	1.23697	0.919375	1.56115	1.8943		1.43546	0.472246
ENSGALG00000003403	ENSGALG00000003403	ZNF385C	ZNF385C	chr27:5186132-5220676	ENSG00000187595	ZNF385C	chr17:42025576-42098479	0.487318	0.256795	1.11735	0.227892	0.357656	1.00716	0.165216	0.33929	0.653346	0.550419	0.548341	0.246957		0.496478	0.304829
ENSGALG00000003405	ENSGALG00000003405	BSDC1	BSDC1	chr23:5206053-5215312	ENSG00000160058	BSDC1	chr1:32365103-32394731	24.2453	26.3258	23.9779	23.4199	24.8295	24.1542	23.7367	25.3292	23.3825	22.8804	27.9259	25.1336		24.6117	1.42051
ENSGALG00000003408	ENSGALG00000003408	-	ZBTB8B	chr23:5215378-5216602	ENSG00000254553	AL033529.1	chr1:32465057-32600792	19.1905	15.9773	20.5738	16.542	24.6477	18.0086	16.6156	14.4623	27.96	24.4542	21.864	19.4605		19.9797	4.08738
ENSGALG00000003409	ENSGALG00000003409	SOGA1	SOGA1	chr20:2806855-2819565	ENSG00000149639	SOGA1	chr20:36777442-36863686	9.19983	11.569	11.7397	6.66697	8.50715	13.8577	7.30984	10.5287	10.0137	9.14149	13.8702	8.38107		10.0654	2.33841
ENSGALG00000003412	ENSGALG00000003412	-	ENSGALG00000003412	chr17:7265699-7284064				7.82281	12.7892	11.5542	6.21099	9.27136	13.2759	7.10595	13.2393	10.4409	8.05629	8.64688	5.35224		9.4805	2.75664
ENSGALG00000003415	ENSGALG00000003415	-	ENSGALG00000003415	chr11:3525435-3526031	ENSG00000182810	DDX28	chr16:68021274-68023442	53.7726	52.7922	50.2064	55.5699	57.8058	56.438	56.201	54.219	61.0429	57.8705	31.4	55.1082		53.5355	7.49345
ENSGALG00000003416	ENSGALG00000003416	FAM160A2	FAM160A2	chr1:194465095-194472407	ENSG00000051009	FAM160A2	chr11:6211335-6234711	15.1917	16.5305	14.7508	11.8473	12.5134	15.6449	13.6038	14.5425	16.3074	16.5872	16.3009	15.1933		14.9178	1.56715
ENSGALG00000003419	ENSGALG00000003419	MPHOSPH9	MPHOSPH9	chr15:5099848-5123800	ENSG00000051825	MPHOSPH9	chr12:123152320-123244014	6.65451	6.55024	8.0542	6.11972	7.90159	9.12627	5.11382	7.551	6.51125	5.4347	5.17574	5.7527		6.66215	1.26513
ENSGALG00000003420	ENSGALG00000003420	-	ENSGALG00000003420	chr23:5225562-5237226	ENSG00000254553	AL033529.1	chr1:32465057-32600792	9.92797	13.1458	14.3694	7.69779	10.9924	13.1248	8.8008	12.9308	12.4724	10.7929	9.9568	9.89094		11.1752	2.02823
ENSGALG00000003424	ENSGALG00000003424	LMX1A	LMX1A	chr8:5172827-5196196	ENSG00000162761	LMX1A	chr1:165201867-165356715	0.662944	0.212729	0.40203	0.457387	0.378429	0.570889	0.284043	0.149717	0.290996	0.603095	0.229538	0.64274		0.407045	0.179336
ENSGALG00000003425	ENSGALG00000003425	-	GALR1L	chr11:3528454-3543639				0.0325572	0.0835769	0.101539	0	0	0	0	0	0	0.0367672	0	0.113634		0.0306729	0.044035
ENSGALG00000003426	ENSGALG00000003426	RHBDL3	RHBDL3	chr18:6752225-6795369	ENSG00000141314	RHBDL3	chr17:32266176-32324661	0.0890616	0.0762094	0.092588	0	0	0.184067	0.0352238	0.181021	0.234559	0.0335261	0.0411156	0.172695		0.0950055	0.0795131
ENSGALG00000003427	ENSGALG00000003427	USP3	USP3	chr10:3979107-3998647	ENSG00000140455	USP3	chr15:63504511-63594640	40.6097	43.9333	45.2895	38.8002	37.2556	54.7894	40.7218	48.5575	32.2997	33.0199	28.3464	33.0455		39.7224	7.60702
ENSGALG00000003428	ENSGALG00000003428	-	ENSGALG00000003428	chr28:4018518-4028659	ENSG00000105647	PIK3R2	chr19:18153118-18170540	17.6019	19.5879	21.0746	11.829	14.8711	23.2394	12.5818	16.3965	14.8971	12.7185	17.2801	15.738		16.4847	3.50306
ENSGALG00000003429	ENSGALG00000003429	PBX1	PBX1	chr8:5221119-5325617	ENSG00000185630	PBX1	chr1:164555584-164899296	41.7281	44.2308	53.8226	37.6043	55.9123	41.3501	35.7756	47.6832	67.6966	55.8318	60.3099	39.065		48.4175	10.1375
ENSGALG00000003430	ENSGALG00000003430	PMS2	PMS2	chr14:979255-991301	ENSG00000122512	PMS2	chr7:5973239-6009125	22.6871	28.9071	26.525	23.3812	29.7912	29.7081	26.4726	29.1176	28.8861	25.496	17.5308	20.5736		25.7564	3.97344
ENSGALG00000003432	ENSGALG00000003432	AGXT2	AGXT2	chrZ:10584478-10596987	ENSG00000113492	AGXT2	chr5:34998101-35048135	0.394495	0.774418	0.796106	0.39298	0.715309	1.09349	0.440534	0.471661	0.947297	0.576539	0.482082	0.485965		0.630906	0.23146
ENSGALG00000003433	ENSGALG00000003433	-	ENSGALG00000003433	chr11:3565748-3573871	ENSG00000141096	DPEP3	chr16:67975663-67980829	0.283398	0.291003	0.397737	0.319952	0.181994	0.245999	0.302627	0.374411	0.037319	0.160023	0.706493	0.263771		0.297061	0.161733
ENSGALG00000003434	ENSGALG00000003434	C17orf75	C17orf75	chr18:6801942-6805493	ENSG00000108666	C17orf75	chr17:32324565-32350023	25.6045	27.3971	21.8353	26.4892	24.3015	25.885	27.2524	26.0688	15.7738	16.3447	15.3513	25.3809		23.1404	4.6477
ENSGALG00000003435	ENSGALG00000003435	-	PGC	chr26:4946917-4950939				0.342515	0.410323	0.569723	0.850725	0.469243	0.481365	0.812787	0.881819	0.541244	0.773612	0.790616	0.743851		0.638985	0.189331
ENSGALG00000003438	ENSGALG00000003438	NUF2	NUF2	chr8:5469839-5481533	ENSG00000143228	NUF2	chr1:163266576-163355764	103.991	92.52	101.929	115.371	116.985	97.3438	120.55	98.1409	95.2769	101.567	91.2365	113.101		104.001	10.0647
ENSGALG00000003439	ENSGALG00000003439	PLEKHM2	PLEKHM2	chr21:4198317-4217429	ENSG00000116786	PLEKHM2	chr1:15684332-15734769	27.1103	26.2031	21.0471	25.7109	19.2642	22.6	25.0001	23.3804	26.061	24.4522	30.4563	33.4853		25.3976	3.86846
ENSGALG00000003441	ENSGALG00000003441	GTF3C5	GTF3C5	chr17:7256051-7262972	ENSG00000148308	GTF3C5	chr9:133030675-133058503	29.9048	33.4785	28.9073	33.4292	36.2412	29	30.3753	30.6181	32.8889	31.9566	23.2622	32.091		31.0128	3.23579
ENSGALG00000003443	ENSGALG00000003443	LRRC52	LRRC52	chr8:5481660-5491026	ENSG00000162763	LRRC52	chr1:165544007-165563961	1.37407	0.91377	1.11512	1.15528	0.914358	1.48972	0.948183	0.983119	2.16147	1.98767	2.40332	1.16345		1.38413	0.520903
ENSGALG00000003445	ENSGALG00000003445	MGST3	MGST3	chr8:5481660-5491026	ENSG00000143198	MGST3	chr1:165630861-165661796	121.353	126.041	133.287	132.995	124.736	116.807	124.46	135.71	190.709	174.925	226.667	161.273		147.414	34.0626
ENSGALG00000003446	ENSGALG00000003446	PRLR	PRLR	chrZ:10611244-10678470	ENSG00000113494	PRLR	chr5:35048756-35230589	0	0	0	0.0355892	0.0809834	0	0	0	0	0.0355996	0.056666	0.0130086		0.0184872	0.0275865
ENSGALG00000003447	ENSGALG00000003447	FRS3	FRS3	chr26:4956896-4962659	ENSG00000137218	FRS3	chr6:41770176-41786542	2.58343	1.89067	2.65039	2.60963	2.24116	1.8266	2.44681	2.21091	2.23813	3.45493	4.9903	2.53106		2.6395	0.851162
ENSGALG00000003454	ENSGALG00000003454	ZNF207	ZNF207	chr18:6806512-6818207	ENSG00000010244	ZNF207	chr17:32350117-32381886	222.866	211.277	267.364	262.654	218.206	247.539	257.375	245.555	348.893	320.074	230.495	236.496		255.733	41.1726
ENSGALG00000003456	ENSGALG00000003456	CA12	CA12	chr10:4027276-4045255	ENSG00000074410	CA12	chr15:63321378-63382161	0	0	0.055535	0	0	0.044162	0	0.072385	0	0.0804368	0.0493229	0		0.0251535	0.032452
ENSGALG00000003457	ENSGALG00000003457	CNP	CNP	chr27:5156867-5161795	ENSG00000173786	CNP	chr17:41966741-41977731	1.65303	1.72045	1.75305	1.78183	2.05763	1.85422	1.58855	1.33299	1.51116	1.82493	2.82188	1.98835		1.82401	0.371659
ENSGALG00000003458	ENSGALG00000003458	-	CCZ1	chr14:1005407-1019260	ENSG00000122674	CCZ1	chr7:5898725-5926550	21.2809	24.9191	40.9433	22.7427	27.2792	32.577	23.4419	33.2829	43.6874	31.5769	27.798	20.3444		29.1561	7.51639
ENSGALG00000003461	ENSGALG00000003461	-	USP49	chr26:4994618-5002981	ENSG00000164663	USP49	chr6:41789896-41895361	0.945434	1.4562	1.57259	0.925061	1.10635	1.14633	0.772766	1.30244	1.24498	0.73552	1.68766	1.34438		1.18664	0.30508
ENSGALG00000003462	ENSGALG00000003462	-	OCM	chr14:1022707-1026097	ENSG00000122543	OCM	chr7:5879827-5886362	0	0	0.100166	0	0	0	0	0	0	0	0	0		0.00834717	0.0289154
ENSGALG00000003464	ENSGALG00000003464	TTC25	TTC25	chr27:5149291-5156649	ENSG00000204815	TTC25	chr17:41930635-41965651	0.833257	1.36534	1.21644	1.30101	2.07211	0.923353	0.778306	1.36931	1.30738	1.1212	0.540184	1.27883		1.17556	0.389412
ENSGALG00000003465	ENSGALG00000003465	-	ENSGALG00000003465	chr14:1040455-1045908				0.45714	0.276121	0.41933	0.394667	0.2763	0.333455	0.574302	0.491904	0.318695	0.546621	0.297939	0.688276		0.422896	0.132428
ENSGALG00000003466	ENSGALG00000003466	AKR1B1L	AKR1B1L	chr1:62199782-62231384	ENSG00000165568	AKR1E2	chr10:4786629-4848062	1.9308	2.74687	3.98793	2.18153	2.6823	3.08841	1.74678	2.46177	5.37242	2.89598	4.0789	2.33581		2.95913	1.04649
ENSGALG00000003467	ENSGALG00000003467	BYSL	BYSL	chr26:5026786-5029465	ENSG00000112578	BYSL	chr6:41921188-41933046	214.455	219.031	209.174	244.148	222.606	199.123	236.95	238.508	316.617	261.811	172.541	276.099		234.255	37.9574
ENSGALG00000003470	ENSGALG00000003470	ZMAT4	ZMAT4	chr22:2545783-2565726	ENSG00000165061	ZMAT4	chr8:40530590-40897833	0.565929	1.52543	7.76606	0.25557	1.96253	6.52654	0.26859	1.55287	4.84404	1.98124	3.13516	0.395051		2.56492	2.52955
ENSGALG00000003472	ENSGALG00000003472	VWC2L	VWC2L	chr7:4153989-4190146	ENSG00000174453	VWC2L	chr2:214411065-214578959	1.51351	0.925072	1.57344	2.00707	1.91305	1.45975	2.08082	1.63579	1.92978	2.38749	5.92246	1.64906		2.08311	1.26469
ENSGALG00000003473	ENSGALG00000003473	SFRP1	SFRP1	chr22:2593801-2604692	ENSG00000104332	SFRP1	chr8:41261958-41309497	3.29028	12.1012	70.1655	3.10457	13.1097	63.8046	2.66618	10.5422	50.8716	17.8038	26.7952	2.68474		23.0783	24.6614
ENSGALG00000003474	ENSGALG00000003474	MED20	MED20	chr26:5021878-5026730	ENSG00000124641	MED20	chr6:41905354-41921139	73.326	79.8688	67.7586	74.1087	84.413	64.404	81.1105	74.5925	93.9262	83.5765	79.117	90.4585		78.8884	8.65692
ENSGALG00000003475	ENSGALG00000003475	ACLY	ACLY	chr27:5123849-5147962	ENSG00000131473	ACLY	chr17:41866908-41930542	48.3408	52.9339	64.5986	46.1393	52.4088	65.0183	50.2129	59.6287	58.9825	55.6817	60.9745	45.238		55.0132	6.86225
ENSGALG00000003476	ENSGALG00000003476	ERN1	ERN1	chr18:6829424-6861860	ENSG00000178607	ERN1	chr17:64039142-64130819	8.2725	5.71604	3.67004	7.99506	5.72878	4.08933	7.43255	5.28485	3.27548	4.59154	4.98686	9.71464		5.89647	2.02361
ENSGALG00000003478	ENSGALG00000003478	GFI1B	GFI1B	chr17:7228968-7237845	ENSG00000165702	GFI1B	chr9:132944000-132991687	0	0.0649513	0.0394552	0.0856951	0.227476	0.0313751	0.0600406	0.0257132	0	0.0285734	0.0350417	0.0588732		0.0547662	0.0600251
ENSGALG00000003479	ENSGALG00000003479	LMTK2	LMTK2	chr14:1080574-1101282	ENSG00000164715	LMTK2	chr7:98106885-98209633	8.93634	5.05627	3.39395	7.24139	5.25982	6.75145	6.57254	6.78027	1.53569	2.8484	3.63407	5.7348		5.31208	2.12659
ENSGALG00000003483	ENSGALG00000003483	GOLGA7	GOLGA7	chr22:2615175-2619099	ENSG00000147533	GOLGA7	chr8:41490396-41510980	98.8794	109.488	121.073	99.4505	92.4252	103.035	98.0924	110.84	119.134	105.488	124.774	100.312		106.916	10.2669
ENSGALG00000003484	ENSGALG00000003484	BARD1	BARD1	chr7:4211634-4254770	ENSG00000138376	BARD1	chr2:214725646-214809711	17.6374	17.2465	15.7749	17.3106	13.8551	15.7369	16.5024	14.0149	10.7645	11.1271	15.6941	16.266		15.1609	2.29101
ENSGALG00000003485	ENSGALG00000003485	CCND3	CCND3	chr26:5031083-5043504	ENSG00000112576	CCND3	chr6:41934933-42050357	29.3132	25.7472	18.3719	29.1388	23.6184	17.5058	28.2029	23.6307	20.5364	22.0191	20.4933	44.4915		25.2558	7.2531
ENSGALG00000003487	ENSGALG00000003487	RAB8B	RAB8B	chr10:4056132-4078464	ENSG00000166128	RAB8B	chr15:63189469-63267782	30.2879	32.2554	24.7906	28.5309	30.552	29.264	28.7269	27.0707	19.3218	19.895	20.615	27.2093		26.5433	4.41206
ENSGALG00000003492	ENSGALG00000003492	-	GINS4	chr22:2619310-2627681				91.5433	104.548	98.9454	90.1809	103.177	91.0104	87.2153	94.715	122.766	103.577	78.9768	108.107		97.8968	11.5117
ENSGALG00000003495	ENSGALG00000003495	-	ENSGALG00000003495	chr8:5491252-5498929	ENSG00000143149	ALDH9A1	chr1:165662216-165698863	122.64	124.986	115.986	124.575	129.307	126.18	129.894	117.568	132.223	135.543	124.883	124.617		125.7	5.59005
ENSGALG00000003496	ENSGALG00000003496	TEX2	TEX2	chr18:6866077-6879693	ENSG00000136478	TEX2	chr17:64147227-64263301	9.78157	11.6425	11.0864	9.52096	12.2168	11.7344	11.0532	15.1228	10.2981	13.4274	18.4702	10.0967		12.0376	2.57961
ENSGALG00000003498	ENSGALG00000003498	TAF8	TAF8	chr26:5069093-5076726	ENSG00000137413	TAF8	chr6:42050513-42087461	25.6625	23.5615	17.9193	27.9728	20.5347	24.8643	24.4474	22.9065	16.6179	17.6579	16.2217	26.709		22.0896	4.14103
ENSGALG00000003499	ENSGALG00000003499	MAST3	MAST3	chr28:4037998-4047856	ENSG00000099308	MAST3	chr19:18097793-18151692	0.781171	1.06533	2.16983	0.633886	0.924929	2.64875	0.448947	0.979944	1.81625	0.951106	0.895941	0.49702		1.15109	0.690276
ENSGALG00000003500	ENSGALG00000003500	-	ENSGALG00000003500	chr17:7209218-7217145	ENSG00000165699	TSC1	chr9:132891348-132944633	6.88852	6.16351	4.99209	4.45323	4.14837	8.01041	5.93491	6.10009	2.37127	2.29182	6.09631	7.01667		5.37227	1.78228
ENSGALG00000003503	ENSGALG00000003503	MYBL2	MYBL2	chr20:3762944-3778150	ENSG00000101057	MYBL2	chr20:43667019-43716496	270.751	287.152	202.936	280.809	313.538	217.053	258.726	238.563	254.071	245.366	221.823	313.101		258.657	35.9532
ENSGALG00000003505	ENSGALG00000003505	LACTB	LACTB	chr10:4089828-4096675	ENSG00000103642	LACTB	chr15:63121800-63142061	20.4638	23.5208	27.3887	21.7936	31.521	24.2971	22.0651	23.5781	32.5565	26.9991	20.9159	17.4185		24.3765	4.50249
ENSGALG00000003507	ENSGALG00000003507	TECPR1	TECPR1	chr14:1112493-1131672	ENSG00000205356	TECPR1	chr7:98214624-98252251	0.556278	0.368519	0.181886	0.496345	0.47247	0.344905	0.372594	0.382964	0.283559	0.3749	0.658588	0.417542		0.409212	0.125025
ENSGALG00000003509	ENSGALG00000003509	SPACA9	SPACA9	chr17:7190612-7195802	ENSG00000165698	SPACA9	chr9:132878027-132890201	0.997521	1.00585	0.981247	1.33911	1.25447	0.971925	1.73832	1.70162	1.1259	0.563224	0.789476	1.57493		1.1703	0.363291
ENSGALG00000003510	ENSGALG00000003510	UCK2	UCK2	chr8:5499624-5536475	ENSG00000143179	UCK2	chr1:165827531-165911618	70.5865	71.1513	63.9084	71.9298	62.3305	61.7755	70.4228	71.6753	71.957	70.3982	69.0353	99.0369		71.184	9.54982
ENSGALG00000003512	ENSGALG00000003512	SPINK7	SPIK7	chr13:10574305-10579769				0.048451	0	0	0.164102	0.062229	0	0.088108	0.0984813	0	0.251584	0	0.259186		0.0810118	0.0964497
ENSGALG00000003517	ENSGALG00000003517	ZBTB8OS	ZBTB8OS	chr23:5237759-5242320	ENSG00000176261	ZBTB8OS	chr1:32600172-32650903	42.5508	37.7234	38.4201	46.5034	42.0829	37.2489	46.7653	35.8738	42.6408	40.0961	35.7059	42.4835		40.6746	3.78167
ENSGALG00000003518	ENSGALG00000003518	GPAT4	GPAT4	chr22:2633240-2636679	ENSG00000158669	GPAT4	chr8:41577187-41625001	36.6687	43.68	37.9578	41.1035	41.0918	32.7105	37.3718	36.6813	42.4401	44.8908	43.9484	43.9377		40.2069	3.8463
ENSGALG00000003519	ENSGALG00000003519	-	ENSGALG00000003519	chr26:5081427-5085396	ENSG00000134216	CHIA	chr1:111290862-111320566	0	0	0.0377655	0.0273418	0.031105	0	0	0.024612	0	0.0546995	0.30187	0		0.0397828	0.0846772
ENSGALG00000003520	ENSGALG00000003520	POLG2	POLG2	chr18:6952524-6957808	ENSG00000256525	POLG2	chr17:64477785-64497036	10.3209	9.81747	10.2453	11.8182	13.8541	9.45439	11.9258	9.76629	10.395	11.5448	9.6765	12.2358		10.9212	1.34434
ENSGALG00000003521	ENSGALG00000003521	-	TPM1	chr10:4105083-4124081				157.493	208.901	240.659	155.993	257.011	235.325	180.867	206.749	259.911	224.429	169.672	119.763		201.398	44.6257
ENSGALG00000003522	ENSGALG00000003522	RBBP4	RBBP4	chr23:5242577-5249616	ENSG00000162521	RBBP4	chr1:32651142-32686211	491.59	513.251	505.383	534.928	471.025	555.228	505.016	516.689	526.403	488.147	405.089	451.568		497.026	40.1971
ENSGALG00000003523	ENSGALG00000003523	IFT52	IFT52	chr20:3780165-3792893	ENSG00000101052	IFT52	chr20:43590931-43647296	53.7031	48.987	47.6596	60.2076	48.5956	38.1582	52.4371	48.4922	49.8785	46.1435	44.4789	53.6014		49.3619	5.46292
ENSGALG00000003526	ENSGALG00000003526	TUBGCP2	TUBGCP2	chr6:9374090-9398734	ENSG00000130640	TUBGCP2	chr10:133278630-133312337	16.1122	17.7817	13.9314	17.5466	13.5567	13.6157	18.1354	15.7039	13.708	14.7359	19.2951	17.1974		15.9433	2.02853
ENSGALG00000003527	ENSGALG00000003527	ARRDC2	ARRDC2	chr28:4063102-4065550	ENSG00000105643	ARRDC2	chr19:18001132-18014102	22.953	22.4636	23.3789	20.2133	22.3588	21.7408	21.0226	20.4933	24.2701	17.3157	11.626	21.9832		20.8183	3.40583
ENSGALG00000003529	ENSGALG00000003529	SYNC	SYNC	chr23:5250047-5253620	ENSG00000162520	SYNC	chr1:32680360-32703596	2.30453	5.28412	8.51317	2.29866	3.79323	5.74319	2.97325	4.32023	11.5495	10.4101	5.70166	1.9523		5.40366	3.21297
ENSGALG00000003532	ENSGALG00000003532	DDX5	DDX5	chr18:6959485-6966959	ENSG00000108654	DDX5	chr17:64499616-64508199	902.654	995.747	1085.88	1021.03	1087.8	1059.23	1019.04	1028.37	1137.93	1023.06	868.422	934.182		1013.61	79.0133
ENSGALG00000003533	ENSGALG00000003533	-	ENSGALG00000003533	chr6:9398773-9403220	ENSG00000198546	ZNF511	chr10:133308475-133313162	41.0177	46.6106	35.0967	40.0843	44.3022	35.3099	40.9863	49.7547	39.6944	38.0969	31.451	45.7794		40.682	5.30899
ENSGALG00000003536	ENSGALG00000003536	KLHL11	KLHL11	chr27:5118444-5123740	ENSG00000178502	KLHL11	chr17:41853545-41865431	11.0189	11.8665	10.3283	10.0263	11.0381	12.953	10.3458	10.4213	6.53546	6.89299	9.11512	11.2008		10.1452	1.86727
ENSGALG00000003537	ENSGALG00000003537	SGK2	SGK2	chr20:3793903-3799772	ENSG00000101049	SGK2	chr20:43558968-43588237	6.72067	6.23458	6.89641	8.05984	5.17455	4.35775	4.8893	6.52347	8.60569	6.52162	15.982	12.4975		7.70528	3.36466
ENSGALG00000003539	ENSGALG00000003539	KIAA1522	KIAA1522	chr23:5271572-5278137	ENSG00000162522	KIAA1522	chr1:32741885-32774970	12.8969	15.4102	13.8255	9.11404	8.97298	15.9389	11.3058	14.752	12.5192	15.6321	19.7578	15.3333		13.7882	3.06314
ENSGALG00000003540	ENSGALG00000003540	CEP95	CEP95	chr18:6970208-6982733	ENSG00000258890	CEP95	chr17:64506588-64542461	7.78712	8.3405	8.67664	8.1678	9.64676	8.02524	7.30413	7.25877	6.61684	6.78868	8.50766	7.17741		7.85813	0.877322
ENSGALG00000003545	ENSGALG00000003545	CFAP77	CFAP77	chr17:7034048-7055559	ENSG00000188523	CFAP77	chr9:132410043-132573317	0.144231	0.185127	0	0	0.0926233	0	0	0.146578	0.189929	0.162882	0	0.0839015		0.0837727	0.0800951
ENSGALG00000003547	ENSGALG00000003547	SKP2	SKP2	chrZ:10937323-10990078	ENSG00000145604	SKP2	chr5:36151989-36184319	27.7631	31.6331	34.466	37.9881	35.4051	43.2408	39.5948	33.5886	43.0046	37.7578	23.0501	34.4631		35.1629	5.86632
ENSGALG00000003548	ENSGALG00000003548	BAIAP2L1	BAIAP2L1	chr14:1148770-1183417	ENSG00000006453	BAIAP2L1	chr7:98291651-98401068	15.159	14.2976	12.7886	17.4969	17.1682	13.9732	15.6301	13.9782	12.7552	19.234	44.225	16.9414		17.804	8.55639
ENSGALG00000003549	ENSGALG00000003549	-	MTG1	chr6:9410234-9412620	ENSG00000254536	AL360181.3	chr10:133390834-133420495	42.8244	43.9199	57.5398	45.9899	51.0675	47.2361	48.2771	49.3362	89.5299	75.2046	56.9112	61.9189		55.813	13.9993
ENSGALG00000003550	ENSGALG00000003550	ARHGAP40	ARHGAP40	chr20:3848252-3884004	ENSG00000124143	ARHGAP40	chr20:38601934-38651035	2.96228	0.966285	1.24572	3.3785	1.54426	1.59893	2.30844	1.601	0.749546	2.50905	6.05815	5.38293		2.52542	1.69248
ENSGALG00000003553	ENSGALG00000003553	ABCA12	ABCA12	chr7:4266826-4314212	ENSG00000144452	ABCA12	chr2:214931542-215138428	0.0418899	0.0119483	0.0290324	0.0578025	0.0179341	0.0115434	0.0331349	0.0425714	0	0.0315379	0.0515697	0.0703964		0.0332801	0.0208144
ENSGALG00000003554	ENSGALG00000003554	OPTC	OPTC	chr26:5176852-5180319	ENSG00000188770	OPTC	chr1:203494143-203508864	0.242653	0.138381	0.630668	0.2435	0.425027	0.460233	0.159719	0.410998	0.390567	0.27403	0.605663	0.195974		0.348118	0.165308
ENSGALG00000003557	ENSGALG00000003557	PAOX	PAOX	chr6:9413042-9422083	ENSG00000148832	PAOX	chr10:133379234-133391694	5.68723	6.63939	8.94701	5.25384	6.71605	9.1327	6.18615	8.11735	11.6367	11.9016	10.2716	7.30568		8.14961	2.25016
ENSGALG00000003558	ENSGALG00000003558	NADK2	NADK2	chrZ:10993358-11023191	ENSG00000152620	NADK2	chr5:36192592-36242279	10.6167	11.6069	8.98498	10.7815	11.6144	15.3484	11.9004	8.56648	6.39309	5.96467	5.3569	9.74489		9.73994	2.8855
ENSGALG00000003559	ENSGALG00000003559	ACTR5	ACTR5	chr20:3889664-3899937	ENSG00000101442	ACTR5	chr20:38748442-38772520	30.6213	25.8293	23.8396	33.016	30.3273	28.6544	30.6127	26.0029	28.454	30.6062	26.641	34.0412		29.0538	3.05594
ENSGALG00000003560	ENSGALG00000003560	SLC6A2	SLC6A2	chr11:3672298-3735390	ENSG00000103546	SLC6A2	chr16:55655604-55706192	0.408098	0.414152	0.900203	0.276438	0.464415	0.694357	0.470368	0.707504	0.429912	1.29188	3.69156	0.339144		0.840669	0.94196
ENSGALG00000003562	ENSGALG00000003562	NPTX2	NPTX2	chr14:1225062-1235848	ENSG00000106236	NPTX2	chr7:98617297-98629868	13.3993	17.863	22.5093	14.8604	19.4322	24.6119	12.0729	19.1334	17.7616	16.7354	16.5502	14.8321		17.4801	3.61952
ENSGALG00000003563	ENSGALG00000003563	YARS	YARS	chr23:5279492-5284301	ENSG00000134684	YARS	chr1:32775237-32818153	61.1479	76.063	59.7629	67.6255	55.3774	61.4913	67.3438	58.8385	77.2691	72.3345	59.8976	75.8275		66.0816	7.70755
ENSGALG00000003566	ENSGALG00000003566	SMURF2	SMURF2	chr18:6986938-7040227	ENSG00000108854	SMURF2	chr17:64542295-64662068	7.95785	7.79123	12.7262	6.25238	5.86842	8.71449	6.95622	10.2099	11.1011	8.0959	7.84282	7.41979		8.41136	2.00954
ENSGALG00000003567	ENSGALG00000003567	FNDC5	FNDC5	chr23:5294113-5304982	ENSG00000160097	FNDC5	chr1:32862268-32872482	0.17015	0.327592	0.464329	0.0960481	0	0.421987	0.353295	0.518754	0.616165	0.816647	0.765866	0.0989787		0.387484	0.265309
ENSGALG00000003568	ENSGALG00000003568	PPP1R16B	PPP1R16B	chr20:3918079-3963460	ENSG00000101445	PPP1R16B	chr20:38805705-38923024	3.70394	2.51137	1.35424	2.87047	2.04265	2.45222	2.0608	1.92463	0.868026	3.82841	8.08597	3.4815		2.93202	1.85839
ENSGALG00000003569	ENSGALG00000003569	TMEM130	TMEM130	chr14:1309030-1318031	ENSG00000166448	TMEM130	chr7:98846488-98870771	9.92777	7.44832	5.85355	14.9316	8.29672	6.93027	11.8483	7.08778	5.7495	9.4576	7.98315	15.951		9.2888	3.35783
ENSGALG00000003570	ENSGALG00000003570	ATIC	ATIC	chr7:4369398-4387211	ENSG00000138363	ATIC	chr2:215311817-215349773	289.673	355.971	373.691	307.045	330.294	337.078	306.561	373.058	529.911	433.689	259.482	270.202		347.221	75.6161
ENSGALG00000003572	ENSGALG00000003572	-	ENSGALG00000003572	chr28:4085165-4125847	ENSG00000268861	AC008878.3	chr19:7382834-7472477	20.9985	20.0168	16.9476	24.0966	20.1287	19.5086	20.0608	17.3728	15.578	14.7202	16.6122	17.2714		18.6094	2.65272
ENSGALG00000003573	ENSGALG00000003573	HPCA	HPCA	chr23:5309930-5318833	ENSG00000121905	HPCA	chr1:32885994-32898441	0.831557	0.706215	0.768248	0.515217	2.99e-07	0.977008	0.11664	0.856693	1.28927	0.513281	3e-07	0.837163		0.617608	0.404205
ENSGALG00000003574	ENSGALG00000003574	LPCAT2	LPCAT2	chr11:3756708-3784646	ENSG00000087253	LPCAT2	chr16:55508998-55586670	1.75526	1.2079	1.41804	1.87424	1.33091	0.930954	1.46787	1.62262	0.849365	1.421	3.70502	2.01755		1.63339	0.739271
ENSGALG00000003575	ENSGALG00000003575	DNTTIP1	DNTTIP1	chr20:10705138-10708994	ENSG00000101457	DNTTIP1	chr20:45791937-45811427	132.6	141.544	154.762	145.295	144.252	122.453	141.251	145.538	229.112	189.957	133.473	155.493		152.977	29.1697
ENSGALG00000003578	ENSGALG00000003578	FN1	FN1	chr7:4390374-4439659	ENSG00000115414	FN1	chr2:215360440-215436172	12.4953	17.503	47.5728	7.88617	18.7873	50.5726	10.3274	29.0385	36.5183	45.0372	168.772	5.61228		37.5102	44.3555
ENSGALG00000003580	ENSGALG00000003580	MMP2	MMP2	chr11:3807840-3842546	ENSG00000087245	MMP2	chr16:55389700-55506691	0	0.0255856	0.0622714	0.011743	0	0.0257963	0	0.0105706	0.0524988	0.0225112	0.0144055	0.0363041		0.0218072	0.0202914
ENSGALG00000003582	ENSGALG00000003582	SLC1A3	SLC1A3	chrZ:11172321-11232589	ENSG00000079215	SLC1A3	chr5:36606355-36688334	0.668851	0.631248	0.0920296	0.510817	0.555857	0.195154	0.793591	0.179929	0.0777148	0.377671	0.408676	0.77816		0.439142	0.257884
ENSGALG00000003584	ENSGALG00000003584	KPNA2	KPNA2	chr18:7053033-7058678	ENSG00000182481	KPNA2	chr17:68035519-68046842	243.338	292.471	264.663	265.313	260.839	225.051	239.702	277.09	308.264	254.272	266.863	290.766		265.719	23.8776
ENSGALG00000003588	ENSGALG00000003588	IRX5	IRX5	chr11:4282004-4284457	ENSG00000176842	IRX5	chr16:54930862-54934485	0	0.106625	0	0.187571	0	0.0515058	0.246408	0.0422111	0	0.0938128	0.287625	0.241617		0.104781	0.108654
ENSGALG00000003589	ENSGALG00000003589	VTN	VTN	chr19:5643261-5647788	ENSG00000109072	VTN	chr17:28367276-28373091	49.5736	42.8422	64.3371	46.0492	39.7942	53.6276	50.898	57.4996	86.1221	81.2094	51.0042	55.9755		56.5777	14.2806
ENSGALG00000003590	ENSGALG00000003590	C17orf58	C17orf58	chr18:7060622-7067829	ENSG00000186665	C17orf58	chr17:67991101-67996431	2.42279	2.13561	3.57324	2.70233	2.06201	2.17183	2.28585	3.35215	5.34299	2.60422	3.92145	2.61498		2.93245	0.967004
ENSGALG00000003594	ENSGALG00000003594	ANK1	ANK1	chr22:2643818-2666293	ENSG00000029534	ANK1	chr8:41653220-41896762	2.2376	1.44683	0.411021	1.31692	0.828321	0.556337	0.918241	0.478738	0.28801	0.303994	0.124271	0.652454		0.796895	0.60808
ENSGALG00000003595	ENSGALG00000003595	SARM1	SARM1	chr19:5648057-5653116	ENSG00000004139	SARM1	chr17:28364356-28404049	2.72673	2.03665	3.147	2.0175	1.62246	3.47679	2.02889	1.94133	2.43435	2.627	1.40816	2.24037		2.30894	0.604353
ENSGALG00000003596	ENSGALG00000003596	TRRAP	TRRAP	chr14:1319981-1397532	ENSG00000196367	TRRAP	chr7:98877933-99013243	10.0984	8.28955	10.7018	8.0178	9.65024	12.1577	9.34241	10.9633	7.84611	7.95578	8.33095	7.13311		9.20726	1.53081
ENSGALG00000003597	ENSGALG00000003597	AK2	AK2	chr23:5337091-5343837	ENSG00000004455	AK2	chr1:33007940-33080996	199.666	230.345	221.847	225.698	266.403	213.203	215.783	213.009	271.036	236.678	175.181	216.19		223.753	26.215
ENSGALG00000003601	ENSGALG00000003601	ATP2B4	ATP2B4	chr26:5209969-5248800	ENSG00000058668	ATP2B4	chr1:203626561-203744081	49.4662	38.481	26.4776	41.5922	41.5779	37.6333	34.8706	25.8073	21.0061	22.1516	16.2746	36.3027		32.6368	10.0834
ENSGALG00000003602	ENSGALG00000003602	-	ENSGALG00000003602	chr11:4979230-5000529	ENSG00000103494	RPGRIP1L	chr16:53597683-53703938	5.0592	3.26519	4.32351	4.00145	3.96481	5.81286	3.1879	3.48576	1.69377	1.5494	1.02925	2.02852		3.28347	1.47258
ENSGALG00000003604	ENSGALG00000003604	SLC46A1	SLC46A1	chr19:5656630-5660143	ENSG00000076351	SLC46A1	chr17:28394756-28407197	10.6316	8.89266	7.04033	10.9459	6.7072	7.68832	10.7136	7.3158	9.01375	12.6408	8.32747	15.4674		9.6154	2.59442
ENSGALG00000003605	ENSGALG00000003605	-	ENSGALG00000003605	chrZ:11297073-11454131	ENSG00000164190	NIPBL	chr5:36876759-37066413	8.09604	7.57969	8.91711	9.95302	8.97113	9.92259	10.1885	9.17054	9.05727	7.95272	7.94084	7.00627		8.72964	1.01636
ENSGALG00000003614	ENSGALG00000003614	AZIN2	AZIN2	chr23:5344810-5350016	ENSG00000142920	AZIN2	chr1:33081104-33120530	3.23241	2.88975	4.71477	3.09374	3.77568	3.50341	2.13034	3.19763	5.32589	3.26984	2.82292	3.38786		3.44535	0.850142
ENSGALG00000003624	ENSGALG00000003624	KLHL10	KLHL10	chr27:5113815-5117579	ENSG00000161594	KLHL10	chr17:41835685-41848384	0.308006	0.219633	0.266835	0.154548	0.219775	0.254628	0.284238	0.243458	0.270396	0.347835	0.260686	0.218988		0.254086	0.0492625
ENSGALG00000003625	ENSGALG00000003625	NDUFS5	NDUFS5	chr23:5350670-5351689	ENSG00000168653	NDUFS5	chr1:39026318-39034636	165.246	160.869	217.658	162.943	289.674	185.532	178.091	140.933	307.208	253.277	213.292	193.931		205.721	52.912
ENSGALG00000003628	ENSGALG00000003628	-	ENSGALG00000003628	chr10:4197277-4225106	ENSG00000171914	TLN2	chr15:62390526-62844631	37.5916	31.5053	19.4067	40.2261	32.7594	26.2839	36.4974	33.898	17.2056	22.5963	10.7953	26.4815		27.9373	9.0663
ENSGALG00000003631	ENSGALG00000003631	-	ENSGALG00000003631	chrZ:11521788-11531898	ENSG00000197603	C5orf42	chr5:37106228-37249428	2.90221	4.4824	4.12782	3.40256	4.09616	5.16101	3.61375	4.56998	5.43862	4.06986	5.07952	4.0815		4.25212	0.746272
ENSGALG00000003634	ENSGALG00000003634	PTEN	PTEN	chr6:9577946-9621108	ENSG00000171862	PTEN	chr10:87863113-87971930	100.038	100.144	111.074	113.41	112.198	105.932	117.622	114.578	120.472	117.196	110.426	106.181		110.773	6.59645
ENSGALG00000003636	ENSGALG00000003636	FBLIM1	FBLIM1	chr21:4225295-4228219	ENSG00000162458	FBLIM1	chr1:15756607-15786594	23.3338	23.9801	31.5746	20.0293	18.9009	22.0741	27.2513	38.1005	47.0247	99.866	165.201	36.285		46.1351	43.4925
ENSGALG00000003641	ENSGALG00000003641	KAT6A	KAT6A	chr22:2698594-2723390	ENSG00000083168	KAT6A	chr8:41929479-42051990	13.3998	10.8014	9.21347	10.8977	11.0162	10.6901	11.6955	11.6877	7.52281	7.58035	8.86787	10.3988		10.3143	1.73477
ENSGALG00000003642	ENSGALG00000003642	PDGF-A	PDGFA	chr14:1992074-2013552	ENSG00000197461	PDGFA	chr7:497258-520296	30.8797	38.1267	19.0401	29.4434	35.8342	29.7877	23.5012	26.9007	18.5267	16.0837	7.06771	20.511		24.6419	8.89274
ENSGALG00000003644	ENSGALG00000003644	-	ENSGALG00000003644	chr10:4364154-4365882	ENSG00000198535	C2CD4A	chr15:62066977-62070917	26.2312	21.8492	11.4728	26.5743	20.2576	16.0999	24.5335	15.5403	17.8885	16.8887	13.1198	22.406		19.4051	5.01742
ENSGALG00000003645	ENSGALG00000003645	PITPNM2	PITPNM3	chr15:5177207-5234249	ENSG00000090975	PITPNM2	chr12:122983480-123150015	4.59414	3.06474	2.98973	4.55074	3.3411	3.76859	3.60735	3.39249	2.70169	2.46874	6.33376	5.07977		3.8244	1.1215
ENSGALG00000003647	ENSGALG00000003647	SLC13A2	SLC13A2	chr19:5661976-5671354	ENSG00000007216	SLC13A2	chr17:28473293-28497781	0.188316	0.0483423	0	0.0637817	0	0	0.0670311	0.114828	0	0.212668	0.0782432	0.087637		0.0717373	0.0718722
ENSGALG00000003648	ENSGALG00000003648	SVIP	SVIP	chr5:3016547-3020336	ENSG00000198168	SVIP	chr11:22813799-22830299	4.85449	3.18877	4.27486	5.64183	6.4917	3.75352	6.13255	4.20795	5.03885	5.83697	8.89847	6.11297		5.36941	1.52046
ENSGALG00000003650	ENSGALG00000003650	NOL11	NOL11	chr18:7120864-7131933	ENSG00000130935	NOL11	chr17:67717833-67744531	77.1838	76.2423	76.9298	94.9881	78.2024	83.0901	89.5328	81.9862	75.913	76.4869	54.3823	70.3532		77.9409	9.95999
ENSGALG00000003651	ENSGALG00000003651	NT5C3B	NT5C3B	chr27:5108612-5113311	ENSG00000141698	NT5C3B	chr17:41825181-41836263	29.187	44.2962	45.4258	29.1151	36.905	44.6212	33.712	47.0829	65.0355	51.5313	29.389	23.6777		39.9982	11.8425
ENSGALG00000003652	ENSGALG00000003652	ATAD1	ATAD1	chr6:9626736-9641125	ENSG00000138138	ATAD1	chr10:87751512-87841343	52.5727	51.9396	57.4651	51.4539	54.629	55.8031	54.43	54.6698	56.977	58.9699	44.8159	47.8381		53.4637	4.06179
ENSGALG00000003655	ENSGALG00000003655	GAS2	GAS2	chr5:2933410-3012233	ENSG00000148935	GAS2	chr11:22625642-22813055	10.2901	6.0855	4.92258	12.4678	6.29074	4.23931	10.906	6.48727	5.23178	9.1854	11.6564	13.7098		8.45606	3.28471
ENSGALG00000003657	ENSGALG00000003657	UNC119	UNC119	chr19:5722922-5726777	ENSG00000109103	UNC119	chr17:28546707-28552668	6.10698	4.56735	4.01174	4.47882	3.58213	6.4996	4.25056	3.68959	1.868	1.33046	1.69825	2.09794		3.68179	1.67726
ENSGALG00000003658	ENSGALG00000003658	DHX35	DHX35	chr20:3979357-4005682	ENSG00000101452	DHX35	chr20:38962299-39039723	12.3211	10.758	10.9651	10.8447	9.23285	12.3203	10.0564	10.3841	7.70941	7.87004	7.08656	10.5365		10.0071	1.71329
ENSGALG00000003660	ENSGALG00000003660	FANCF	FANCF	chr5:2903330-2904506	ENSG00000183161	FANCF	chr11:22622519-22626787	14.3765	10.7477	8.49702	13.4852	10.557	8.66564	11.7614	9.10413	9.93198	11.6465	11.6396	17.3708		11.482	2.58479
ENSGALG00000003661	ENSGALG00000003661	SETX	SETX	chr17:6964406-6992177	ENSG00000107290	SETX	chr9:132261356-132354985	14.6517	11.0817	12.5269	12.6233	12.9393	15.1622	12.3574	13.9324	8.43492	8.23992	8.23568	9.71411		11.6583	2.48864
ENSGALG00000003663	ENSGALG00000003663	-	RBL2	chr11:5094100-5112494	ENSG00000103479	RBL2	chr16:53433977-53491649	13.0747	9.40379	7.96516	11.3717	9.19239	11.5433	11.5148	10.6435	6.17691	8.04815	7.04174	10.6163		9.71604	2.09248
ENSGALG00000003665	ENSGALG00000003665	PIGS	PIGS	chr19:5732370-5736475	ENSG00000087111	PIGS	chr17:28553383-28571872	89.1646	87.9236	83.0775	86.519	78.9973	81.1448	83.671	89.3689	114.627	104.927	97.5446	97.7643		91.2275	10.589
ENSGALG00000003670	ENSGALG00000003670	MAFB	MAFB	chr20:4836750-4839401	ENSG00000204103	MAFB	chr20:40685848-40689240	0.477387	0.298517	0.59173	0.635698	0.754635	0.394654	0.580942	0.348315	0.402975	2.28089	16.4952	1.50956		2.06421	4.58118
ENSGALG00000003672	ENSGALG00000003672	UBLCP1	UBLCP1	chr13:10611657-10624468	ENSG00000164332	UBLCP1	chr5:159263081-159286040	42.2589	45.9058	47.4577	47.7192	48.4546	42.503	47.2363	44.9793	46.9111	40.9488	38.8715	40.5603		44.4839	3.29016
ENSGALG00000003674	ENSGALG00000003674	DHTKD1	DHTKD1	chr1:6275963-6292436	ENSG00000181192	DHTKD1	chr10:12068972-12123225	11.3782	10.0277	9.2793	12.1393	8.26753	9.06453	9.87629	10.1588	7.8735	9.46899	13.422	13.9844		10.4117	1.93693
ENSGALG00000003675	ENSGALG00000003675	PRKAR1B	PRKAR1B	chr14:2034749-2121330	ENSG00000188191	PRKAR1B	chr7:549197-727650	4.19324	3.97684	3.13608	4.80355	3.99173	4.36206	3.92494	3.33431	2.42353	4.01509	6.70863	6.35739		4.26895	1.22554
ENSGALG00000003677	ENSGALG00000003677	NTNG2	NTNG2	chr17:6922454-6957371	ENSG00000196358	NTNG2	chr9:132161676-132244534	1.65948	1.0508	1.00061	1.67368	1.22199	1.39932	1.65393	0.989396	1.01979	3.42329	14.3415	3.73265		2.76387	3.76018
ENSGALG00000003681	ENSGALG00000003681	TOP1	TOP1	chr20:4865268-5043775	ENSG00000198900	TOP1	chr20:41028818-41124487	166.219	167.517	165.895	195.284	204.902	94.2028	182.173	134.963	178.338	162.093	144.893	165.046		163.46	29.0603
ENSGALG00000003682	ENSGALG00000003682	ARL6IP4	ARL6IP4	chr15:5238152-5242237	ENSG00000182196	ARL6IP4	chr12:122980060-122982913	72.352	70.8835	74.5631	74.4269	98.2422	65.6604	71.4334	73.7999	97.6736	87.9885	70.7563	81.0626		78.2369	10.7783
ENSGALG00000003683	ENSGALG00000003683	MED27	MED27	chr17:6810485-6891412	ENSG00000160563	MED27	chr9:131860107-132079908	46.385	47.6229	52.9643	42.6326	52.5646	44.5702	41.5193	52.9014	60.6995	49.9114	54.2345	58.3528		50.3632	6.02109
ENSGALG00000003684	ENSGALG00000003684	-	ENSGALG00000003684	chr14:2132067-2141735	ENSG00000164818	DNAAF5	chr7:726701-786475	10.2094	11.6173	9.00118	11.1937	9.60752	7.96125	8.89871	10.3356	8.45427	9.88883	15.7983	11.3297		10.358	2.0664
ENSGALG00000003687	ENSGALG00000003687	OGFOD2	OGFOD2	chr15:5242478-5247808	ENSG00000111325	OGFOD2	chr12:122974580-122980043	13.6837	14.145	9.52605	13.959	11.4865	8.99935	11.9739	10.5291	10.4576	9.65826	10.0172	17.3984		11.8195	2.51128
ENSGALG00000003688	ENSGALG00000003688	NUP155	NUP155	chrZ:11533896-11564728	ENSG00000113569	NUP155	chr5:37288137-37371181	63.3609	59.2699	59.8416	74.8535	58.0459	90.7764	88.0586	71.9979	59.3042	57.8427	41.7455	60.3818		65.4566	13.8036
ENSGALG00000003689	ENSGALG00000003689	PAPSS2	PAPSS2	chr6:9643791-9663329	ENSG00000198682	PAPSS2	chr10:87659613-87747705	1.3443	0.685441	0.172276	1.03952	0.449366	0.456693	0.961377	0.80473	0.266728	1.22699	0.841619	1.04981		0.774904	0.375493
ENSGALG00000003690	ENSGALG00000003690	-	KRT17	chr27:5042179-5052819	ENSG00000186847	KRT14	chr17:41582279-41586921	2.46562	0.848519	0.268096	2.35495	1.06217	0.494477	1.78129	1.00664	0.716375	0.744231	0.972539	1.03184		1.14556	0.694511
ENSGALG00000003691	ENSGALG00000003691	RNF145	RNF145	chr13:10630367-10673899	ENSG00000145860	RNF145	chr5:159157409-159210053	34.158	35.0208	32.9087	32.3248	30.3852	31.6634	35.2975	37.0717	30.7491	31.9996	21.929	32.0736		32.1318	3.77572
ENSGALG00000003693	ENSGALG00000003693	MACF1	MACF1	chr23:5359115-5470470	ENSG00000127603	MACF1	chr1:39081316-39487177	9.73507	8.26808	15.8433	7.92172	9.30256	15.4102	8.45449	11.0689	15.0342	11.2296	12.2081	5.99545		10.8726	3.21149
ENSGALG00000003695	ENSGALG00000003695	MINPP1	MINPP1	chr6:9679454-9696260	ENSG00000107789	MINPP1	chr10:87504875-87553460	4.2428	2.55619	3.20683	2.81049	2.72466	4.13385	2.92798	2.68389	1.93837	2.37128	2.33845	4.50806		3.0369	0.825979
ENSGALG00000003696	ENSGALG00000003696	-	ENSGALG00000003696	chr15:5248108-5253078				35.3753	37.5246	36.3108	36.5946	35.8026	35.268	33.833	33.6214	44.9992	37.2474	33.7181	43.1356		36.9525	3.59128
ENSGALG00000003699	ENSGALG00000003699	EBF1	EBF1	chr13:10683920-10944830	ENSG00000164330	EBF1	chr5:158695916-159099761	0.789426	0.565541	1.76769	1.20215	0.825278	1.18381	0.824869	0.91421	1.77967	1.05737	2.01212	0.693156		1.13461	0.474623
ENSGALG00000003701	ENSGALG00000003701	SGMS1	SGMS1	chr6:9714900-9791882	ENSG00000198964	SGMS1	chr10:50305586-50625163	12.8407	7.16166	4.32504	11.9661	5.44636	4.63468	12.8891	7.25517	4.28666	10.8846	12.3668	15.7784		9.15294	4.06097
ENSGALG00000003702	ENSGALG00000003702	CLINT1	CLINT1	chr13:11235504-11283731	ENSG00000113282	CLINT1	chr5:157785743-157859175	51.3224	49.3401	45.2607	52.2142	54.867	47.1991	50.0381	48.4005	37.9894	37.2754	35.8338	41.3042		45.9204	6.37033
ENSGALG00000003703	ENSGALG00000003703	USE1	USE1	chr28:4172070-4176936	ENSG00000053501	USE1	chr19:17215346-17219829	38.5774	43.6875	47.8531	38.7	47.6356	42.4609	40.6937	47.3561	56.216	45.7936	39.8457	37.7157		43.8779	5.38719
ENSGALG00000003705	ENSGALG00000003705	VPS13C	VPS13C	chr10:4391053-4471783	ENSG00000129003	VPS13C	chr15:61852389-62060473	1.73494	0.678499	0.798955	1.38028	1.10719	1.30765	1.37663	1.33615	0.521183	0.753102	0.844744	1.0187		1.0715	0.362171
ENSGALG00000003708	ENSGALG00000003708	WDR70	WDR70	chrZ:11566339-11702225	ENSG00000082068	WDR70	chr5:37379212-37753435	24.1191	29.054	26.979	32.8027	34.1958	31.9027	35.6423	28.0964	29.1183	26.6468	23.6332	24.8705		28.9217	3.97793
ENSGALG00000003709	ENSGALG00000003709	PLAT	PLAT	chr22:2738387-2750600	ENSG00000104368	PLAT	chr8:42175233-42207724	0.471318	0.280872	0.419983	0.494102	0.281054	0.271354	0.399442	0.273706	0.265992	0.304151	0.373004	0.215421		0.337533	0.0906035
ENSGALG00000003712	ENSGALG00000003712	RAPGEF1	RAPGEF1	chr17:6717451-6765406	ENSG00000107263	RAPGEF1	chr9:131576770-131740074	19.7467	10.018	9.32684	18.417	9.47479	14.0123	16.4175	11.0073	7.66141	9.09037	16.1155	26.8977		14.0155	5.72564
ENSGALG00000003713	ENSGALG00000003713	-	ENSGALG00000003713	chr21:4308965-4313313	ENSG00000184908	CLCNKB	chr1:16043736-16057308	0.526202	0.443836	0.89089	0.220656	0.424813	0.894877	0.356765	0.504204	1.26706	0.831945	0.52055	0.297354		0.598263	0.307626
ENSGALG00000003716	ENSGALG00000003716	GDNF	GDNF	chrZ:11726942-11742980	ENSG00000168621	GDNF	chr5:37812677-37839686	0.593363	0.507737	0.308429	0.52103	0.423388	0.817552	0.704025	0.536014	0.347272	0.595637	0.0913094	0.230112		0.472989	0.204303
ENSGALG00000003717	ENSGALG00000003717	MYO9B	MYO9B	chr28:4177070-4217351	ENSG00000099331	MYO9B	chr19:17075781-17214537	9.90251	10.1985	9.53698	9.56837	8.59767	8.90576	8.66821	8.8666	7.40042	7.51182	12.4778	9.09292		9.2273	1.32864
ENSGALG00000003720	ENSGALG00000003720	FANCD2	FANCD2	chr12:2737320-2782930	ENSG00000144554	FANCD2	chr3:10026414-10101930	17.5789	15.3713	13.9213	16.8472	13.2372	16.4165	16.0693	15.2242	14.8622	15.6226	16.6462	20.3167		16.0095	1.82974
ENSGALG00000003722	ENSGALG00000003722	THG1L	THG1L	chr13:11305711-11311044	ENSG00000113272	THG1L	chr5:157731197-157741448	80.4236	83.4497	100.077	85.2812	102.866	87.1613	80.2038	83.9517	106.444	93.3458	74.8739	76.2183		87.858	10.4874
ENSGALG00000003726	ENSGALG00000003726	EGFLAM	EGFLAM	chrZ:11954662-11993224	ENSG00000164318	EGFLAM	chr5:38258409-38465021	3.09749	3.61742	3.42053	1.99615	2.45871	3.49484	3.92754	5.13388	2.18825	14.7278	27.3044	4.17597		6.29525	7.43157
ENSGALG00000003727	ENSGALG00000003727	HAUS8	HAUS8	chr28:4217426-4224451	ENSG00000131351	HAUS8	chr19:17049729-17075625	31.617	38.4089	29.7293	36.3762	37.051	31.2158	33.0823	30.9745	28.8602	30.6902	28.0105	33.9477		32.497	3.33301
ENSGALG00000003731	ENSGALG00000003731	FBXO42	FBXO42	chr21:4331469-4369323	ENSG00000037637	FBXO42	chr1:16246839-16352454	19.545	21.4369	20.5069	16.1252	14.9358	21.6343	16.8382	22.4221	17.2136	18.5357	21.2464	20.4312		19.2393	2.45739
ENSGALG00000003732	ENSGALG00000003732	UCK1	UCK1	chr17:6709264-6712827	ENSG00000130717	UCK1	chr9:131523801-131531268	49.8064	57.1808	64.5596	51.9445	53.4612	62.2624	49.4412	52.905	66.1914	61.1321	63.9942	63.6762		58.0462	6.25603
ENSGALG00000003733	ENSGALG00000003733	LIFR	LIFR	chrZ:12007503-12048425	ENSG00000113594	LIFR	chr5:38474963-38608354	0.507411	0.503264	0.92313	0.52946	0.71095	1.11542	0.620287	1.22666	1.07314	2.4397	11.4782	1.13595		1.8553	3.0766
ENSGALG00000003734	ENSGALG00000003734	SZRD1	SZRD1	chr21:4371056-4383502	ENSG00000055070	SZRD1	chr1:16352575-16398145	55.7041	48.6727	45.8622	53.8099	62.1258	44.0776	52.4787	50.73	49.2753	51.6598	43.2373	61.8286		51.6218	6.12066
ENSGALG00000003736	ENSGALG00000003736	ABCB9	ABCB9	chr15:5254762-5265560	ENSG00000150967	ABCB9	chr12:122920951-122981649	3.44685	2.27378	2.05578	3.30229	1.72848	2.46919	2.81879	2.33063	1.35626	3.36529	4.8118	5.2244		2.93196	1.17163
ENSGALG00000003738	ENSGALG00000003738	EMC3	EMC3	chr12:2783471-2787316	ENSG00000125037	EMC3	chr3:9962537-10011116	89.0751	103.599	114.896	103.136	99.8171	97.9564	92.9458	106.426	153.7	124.214	126.291	98.1877		109.187	18.1183
ENSGALG00000003741	ENSGALG00000003741	MYO18A	MYO18A	chr19:5930013-5955909	ENSG00000196535	MYO18A	chr17:29071124-29180412	11.761	12.8079	13.3756	11.3384	16.0049	15.6375	11.78	12.8488	15.7918	14.5373	12.7674	8.405		13.088	2.19925
ENSGALG00000003742	ENSGALG00000003742	CPAMD8	CPAMD8	chr28:4229271-4253848	ENSG00000160111	CPAMD8	chr19:16892947-17026815	4.20268	3.75505	2.52419	3.5879	2.72751	4.69588	3.48877	4.02957	1.90667	2.84265	2.44751	2.27198		3.2067	0.872845
ENSGALG00000003743	ENSGALG00000003743	VPS37B	VPS37B	chr15:5272664-5282778	ENSG00000139722	VPS37B	chr12:122865328-122896444	29.8057	17.944	17.5555	28.1286	16.6519	22.3708	26.496	17.5836	14.7641	15.371	14.5693	40.2595		21.7917	7.90602
ENSGALG00000003744	ENSGALG00000003744	ADAM19	ADAM19	chr13:11323098-11349859	ENSG00000135074	ADAM19	chr5:157395534-157575775	5.34582	2.40001	1.40183	3.15299	1.4317	1.63497	2.98652	2.09515	0.284108	3.05916	12.8321	6.14976		3.56451	3.35382
ENSGALG00000003745	ENSGALG00000003745	NECAP2	NECAP2	chr21:4383971-4389687	ENSG00000157191	NECAP2	chr1:16440672-16460078	18.4896	16.7534	15.8164	17.6832	13.6463	15.8351	17.0255	16.2726	15.4144	18.0451	25.7686	23.4071		17.8464	3.44079
ENSGALG00000003747	ENSGALG00000003747	OSMR	OSMR	chrZ:12151429-12180916	ENSG00000145623	OSMR	chr5:38845858-38945596	0.103942	0.106731	0.0486257	0.117348	0.0533998	0.0902245	0.0863286	0.116196	0.0410622	0.105644	0.086373	0.1693		0.0937646	0.0353484
ENSGALG00000003748	ENSGALG00000003748	ANO5	ANO5	chr5:2699424-2749644	ENSG00000171714	ANO5	chr11:22193176-22283357	17.9017	13.6104	8.3486	15.0259	10.5152	11.6494	16.2342	12.6794	6.0032	8.29536	5.66631	8.01651		11.1622	4.02127
ENSGALG00000003750	ENSGALG00000003750	PLCG1	PLCG1	chr20:5046399-5076441	ENSG00000124181	PLCG1	chr20:41136960-41196801	18.664	28.1436	37.9302	15.9613	29.1946	38.6907	17.2106	30.6657	43.4063	29.4237	23.3987	15.4949		27.3487	9.44744
ENSGALG00000003751	ENSGALG00000003751	-	ENSGALG00000003751	chr6:9798540-9814620	ENSG00000204147	ASAH2B	chr10:50739318-50816495	0.0278866	0	0.0217431	0.0157417	0.0537251	0.0172903	0	0.0141701	0.0367221	0.0314927	0.0386219	0		0.0214495	0.0170437
[truncated: 13,814 more rows]
